# Supplementary material for: Comprehensive Evaluation and Transcriptome Analysis Reveal the Salt Tolerance Mechanism in Semi-Wild Cotton (Gossypium purpurascens)
Source: MDPI journal article supplement (doi:10.3390/ijms241612853), 2023-08-16
Supplement: s1 [file s1]

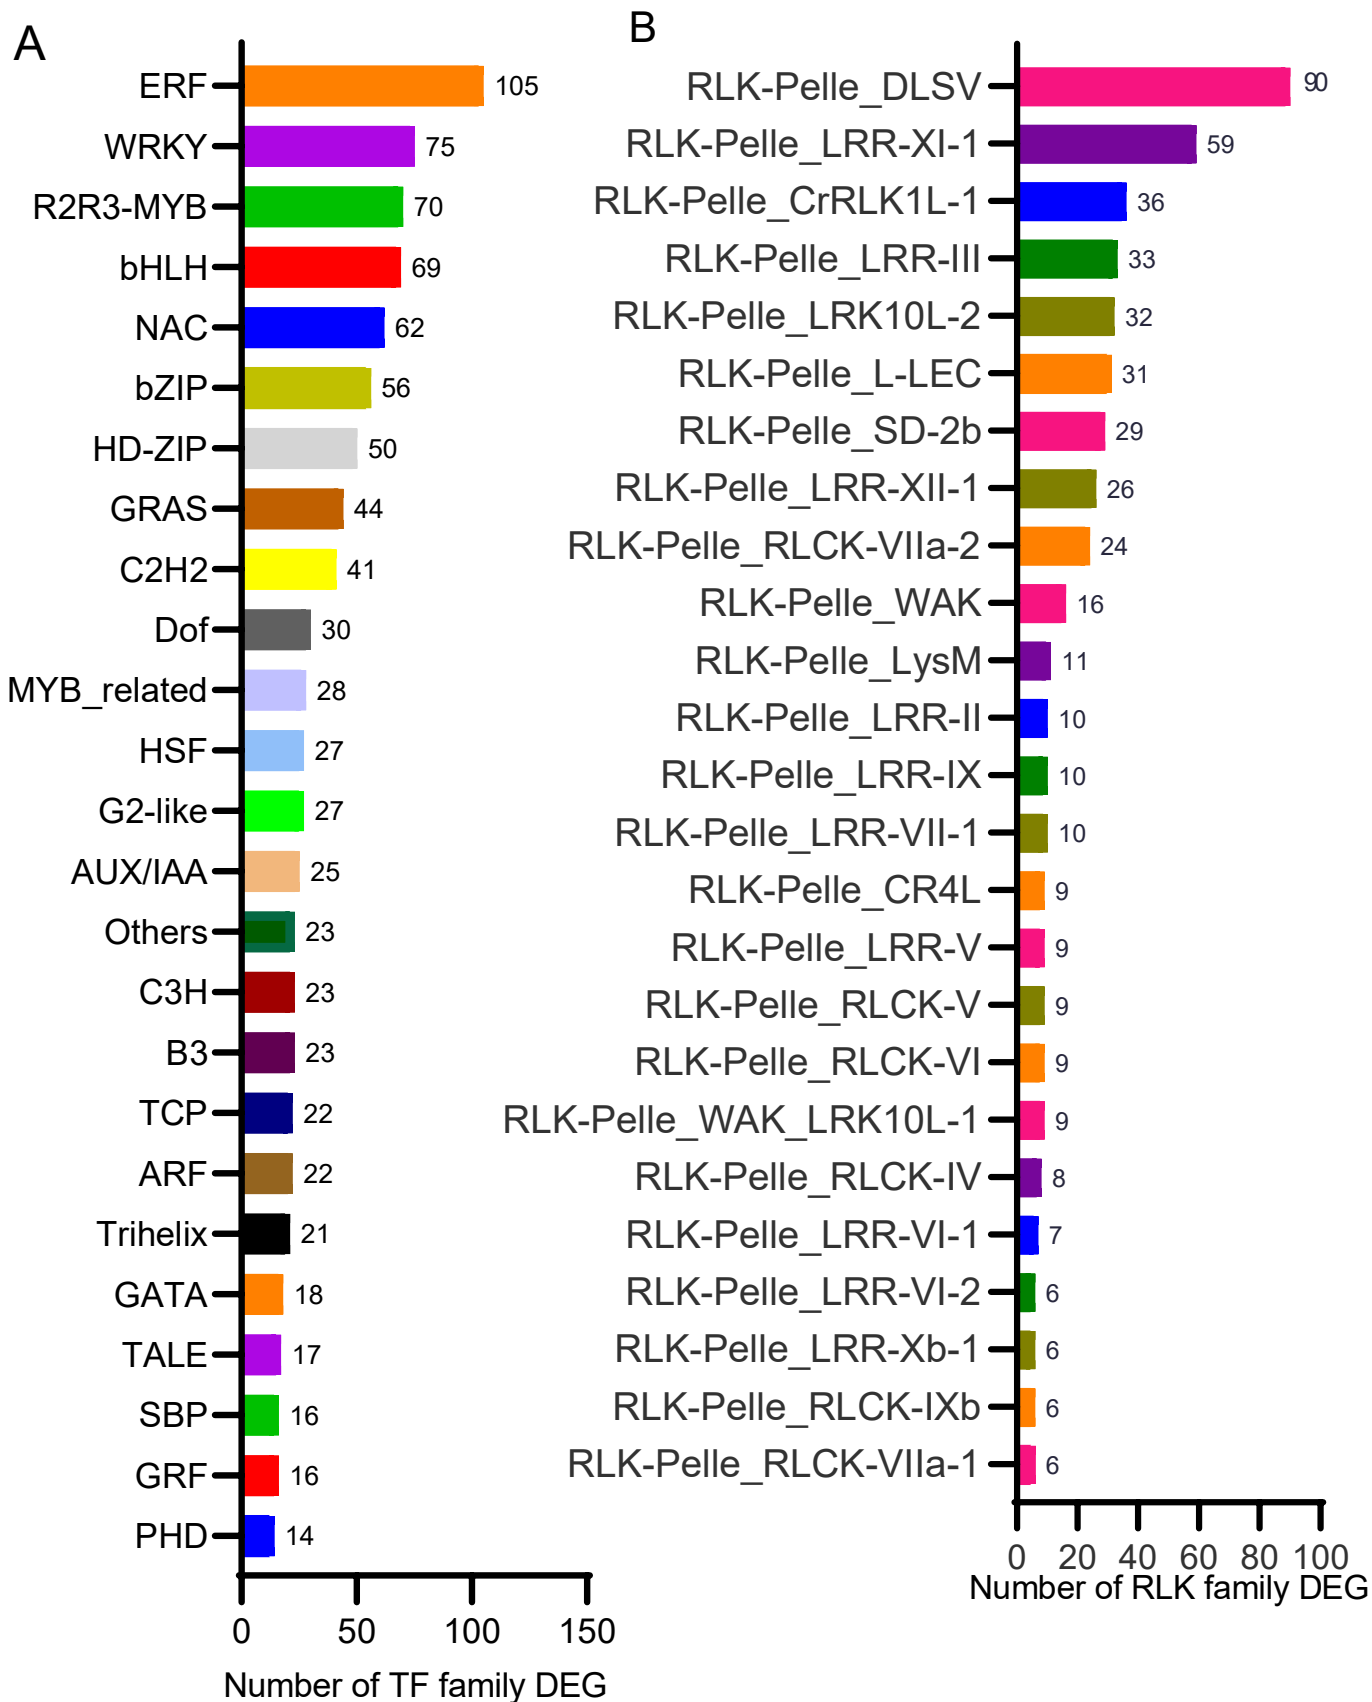

Figure S5: Differential expression analysis of genes related to salt tolerance under salt stress.(A) transcript factors (TFs) family ; (B) Receptor-like kinases (RLKs) family.
