# Supplementary material for: Comprehensive Evaluation and Transcriptome Analysis Reveal the Salt Tolerance Mechanism in Semi-Wild Cotton (Gossypium purpurascens)
Source: MDPI journal article supplement (doi:10.3390/ijms241612853), 2023-08-16
Supplement: s1 [file s1]

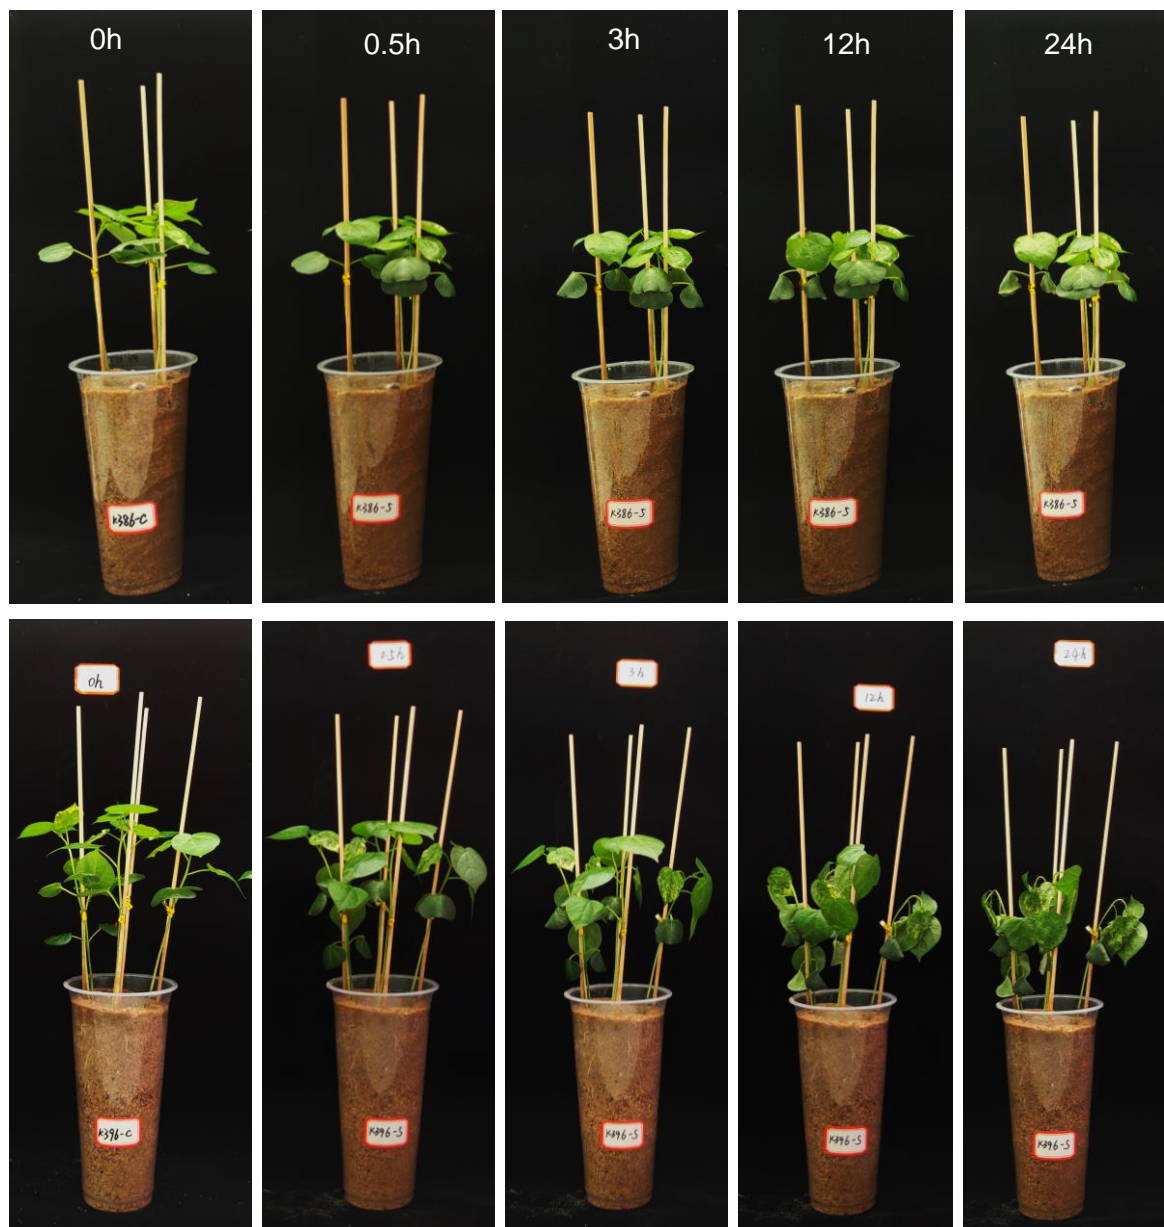

Figure S2:Response performance of two salt tolerant and sensitive germplasm under salt stress at 0.5.3.12.24 hours
