# Supplementary material for: Comprehensive Evaluation and Transcriptome Analysis Reveal the Salt Tolerance Mechanism in Semi-Wild Cotton (Gossypium purpurascens)
Source: MDPI journal article supplement (doi:10.3390/ijms241612853), 2023-08-16
Supplement: s1 [file s1]

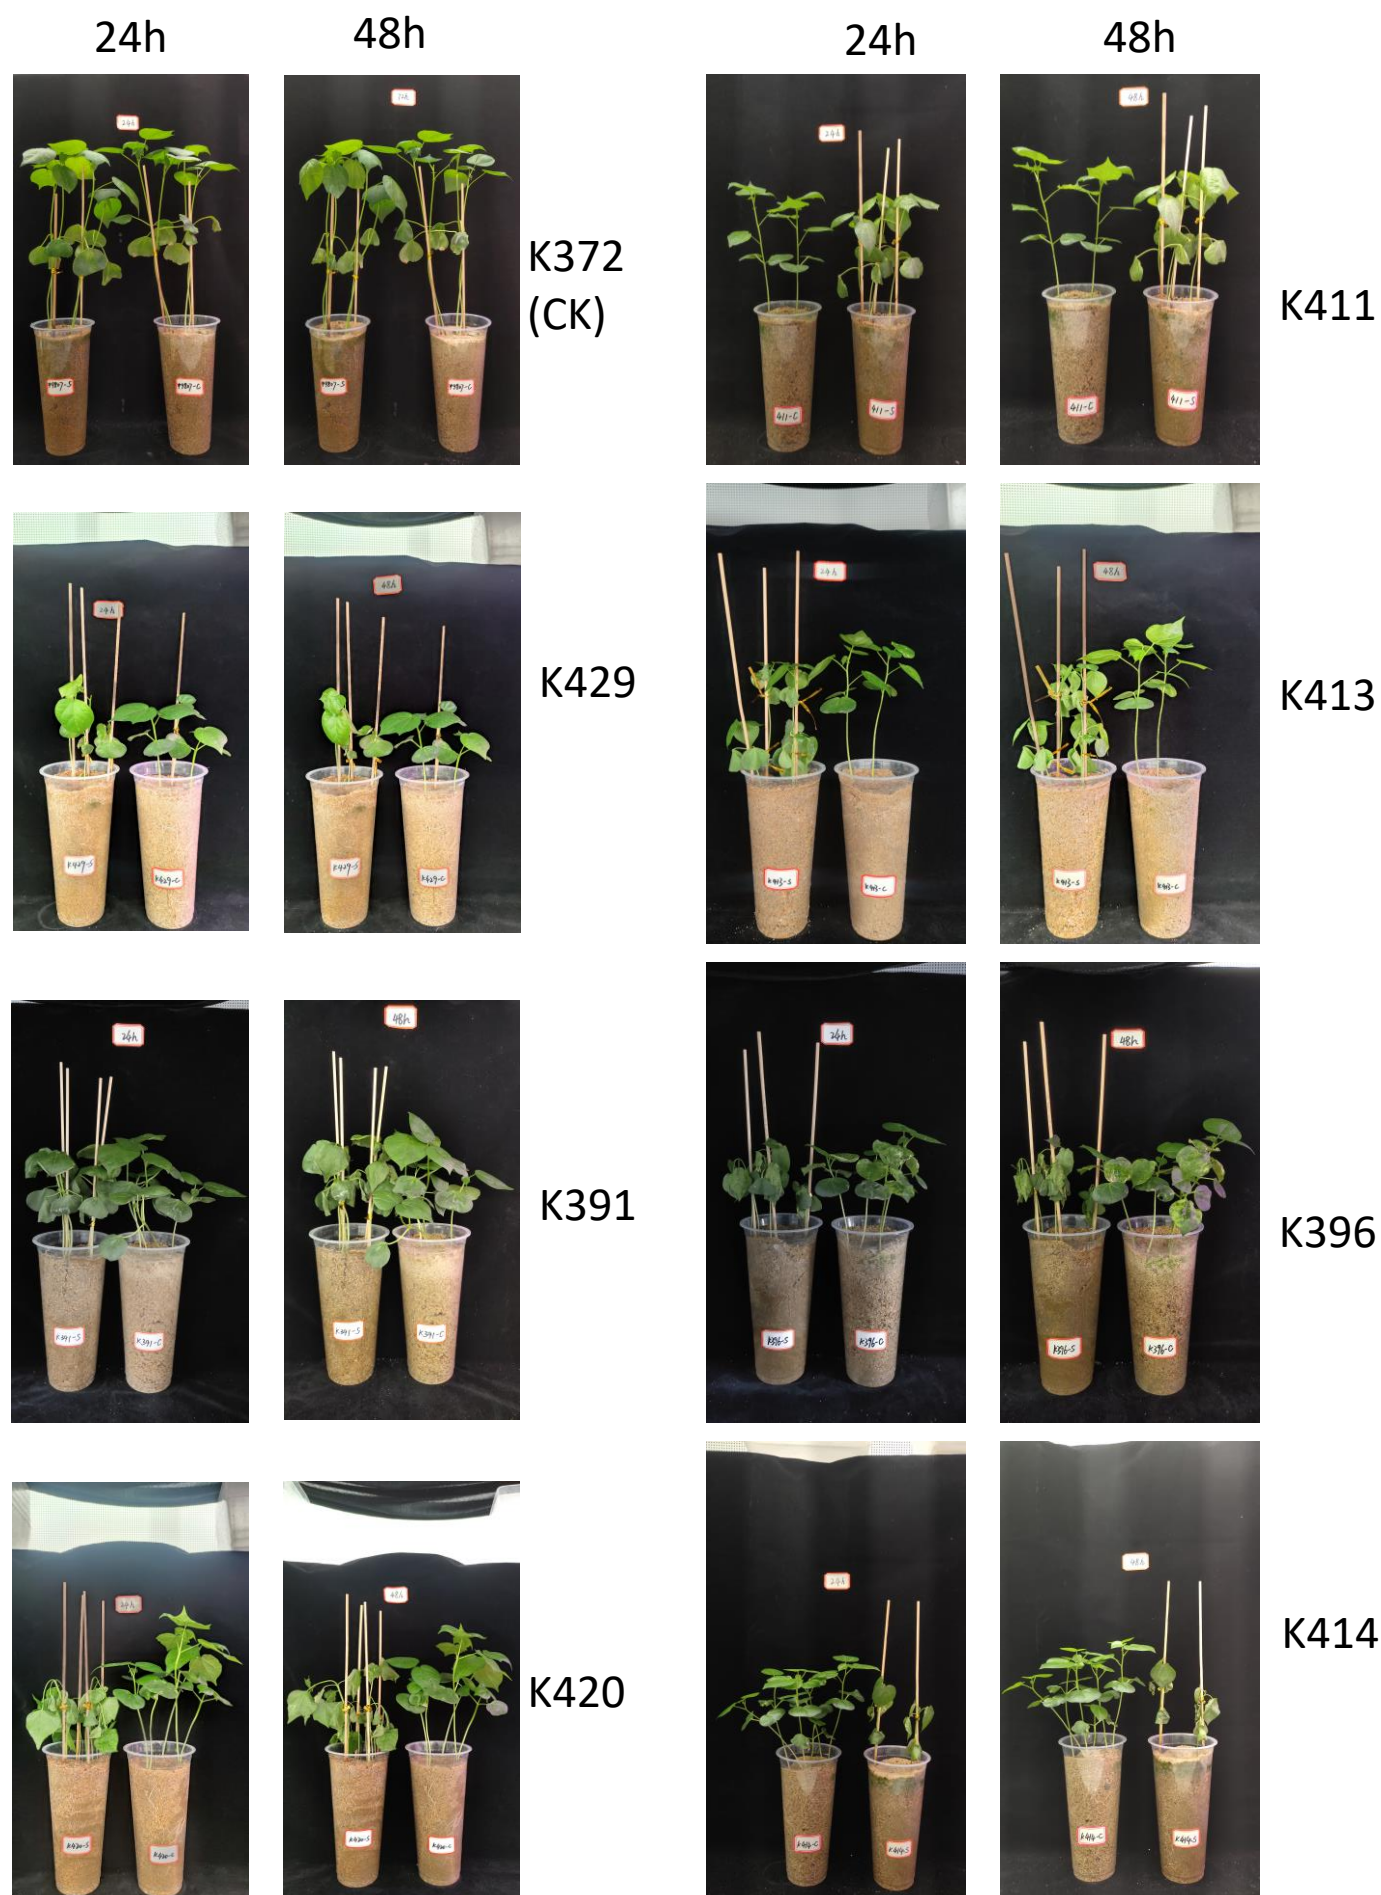

Figure S1: Phenotypic validation of salt tolerance evaluation of *Gossypium purpurascens*. Note: K372(Zhong9807) is upland cotton as CK.
