# Supplementary material for: Comprehensive Evaluation and Transcriptome Analysis Reveal the Salt Tolerance Mechanism in Semi-Wild Cotton (Gossypium purpurascens)
Source: Int J Mol Sci. 2023 Aug 16;24(16):12853. doi: 10.3390/ijms241612853 (PMC10454576; doi:10.3390/ijms241612853)
Supplement: Supplementary file 1 [file ijms-24-12853-s001.zip › Table S1.xlsx]

## Sheet: S1a
Table S1a: Descriptive statistics of saline tolerance index of Gossypium purpurascens traits under salt stress
Traits	Mean	SD	Min	Max	CV
RLFW_24h	1.20915	0.417153	0.74	3.37	0.344997
RLDW_24h	1.21749	0.361825	0.674	2.88	0.297189
RSFW_24h	0.960936	0.0561471	0.843	1.172	0.0584296
RSDW_24h	0.976745	0.3089	0.671	2.726	0.316255
RRWCL_24h	0.933957	0.127179	0.207	1.175	0.136172
RRWCS_24h	0.965617	0.0282201	0.88	1.019	0.0292249
RLFW_48h	1.08894	0.340052	0.466	2.111	0.312279
RLDW_48h	1.12834	0.338132	0.619	2.275	0.299672
RSFW_48h	0.955596	0.0710054	0.736	1.119	0.0743049
RSDW_48h	0.995085	0.280314	0.539	2.473	0.281699
RRWCL_48h	0.940298	0.0974244	0.636	1.185	0.10361
RRWCS_48h	0.965979	0.0511687	0.741	1.161	0.0529709
ST_L_K	0.940064	0.160749	0.392	1.379	0.170998
ST_R_K	0.683638	0.328219	0.32	2.406	0.480107
ST_S_K	0.953298	0.144969	0.598	1.378	0.152071
ST_ShvsR_K	1.5646	0.471799	0.378	2.855	0.301547
ST_L_Mg	0.917638	0.134415	0.745	1.454	0.146479
ST_R_Mg	0.777106	0.301465	0.54	2.239	0.387933
ST_S_Mg	1.10834	0.216391	0.846	2.063	0.195239
ST_ShvsR_Mg	1.38962	0.300835	0.602	2.347	0.216488
ST_L_Na	5.45402	3.27226	2.039	17.993	0.599971
ST_R_Na	1.41087	0.56978	0.806	4.261	0.403849
ST_S_Na	2.93094	1.08555	1.402	5.822	0.370377
ST_ShvsR_Na	2.87436	1.1829	0.892	6.253	0.411536
ST_L_KvsNa	0.230404	0.111707	0.054	0.502	0.484829
ST_R_KvsNa	0.500149	0.173951	0.248	0.952	0.347797
ST_S_KvsNa	0.368426	0.134182	0.14	0.679	0.364204
ST_L_MgvsNa	0.215511	0.0934212	0.05	0.403	0.433488
ST_R_MgvsNa	0.586553	0.169861	0.311	1.296	0.289591
ST_S_MgvsNa	0.414064	0.120013	0.185	0.772	0.289841
RISC_LvsS_K	0.607128	0.223684	0.35	1.291	0.36843
RISC_SvsR_K	0.775872	0.36704	0.218	2.585	0.473068
RISC_LvsS_Mg	0.513043	0.165868	0.213	1.013	0.323302
RISC_SvsR_Mg	0.770723	0.277642	0.224	1.748	0.360235

## Sheet: S1b
Table S1b: The eigenvalues of the first 8 principal components and the eigenvector descriptions of the 34 indicators
Traits	F1	F2	F3	F4	F5	F6	F7	F8
RLFW_24h	0.145217	0.0270629	0.0745055	0.309987	0.350963	0.239766	0.0288277	0.11291
RLDW_24h	0.142288	0.00801169	0.100352	0.295689	0.335548	0.23633	-0.000133775	0.0758129
RSFW_24h	0.0550634	0.078065	-0.0591213	0.187524	0.28035	-0.0762377	0.112727	0.365787
RSDW_24h	-0.0170326	0.0763127	0.0729505	-0.0837415	-0.0168391	0.0410044	-0.191808	-0.100949
RRWCL_24h	0.126205	0.100165	-0.187391	0.0368995	0.0288849	-0.435189	0.159691	-0.222043
RRWCS_24h	-0.0478231	0.0883252	-0.309172	-0.276482	-0.0171935	0.0897684	0.272122	-0.0666935
RLFW_48h	0.206574	0.149251	-0.0467289	-0.147675	0.329511	-0.0236021	0.0513825	-0.12424
RLDW_48h	0.181501	0.0824769	0.0558462	-0.263603	0.248962	0.0529672	0.0563849	-0.245583
RSFW_48h	0.09464	0.14631	-0.189771	0.179561	0.149144	-0.281793	0.223928	0.237081
RSDW_48h	0.126748	0.0489894	-0.150135	-0.168849	0.239805	-0.0454661	-0.120955	0.126372
RRWCL_48h	0.1281	0.138972	-0.190652	0.0807407	0.163777	-0.26148	-0.162533	0.0854788
RRWCS_48h	0.0295349	0.0722469	-0.280028	-0.100124	0.0514022	-0.252399	0.290399	-0.229276
ST_L_K	-0.0822301	-0.0699227	-0.0153313	0.364645	-0.189079	-0.155283	0.117103	-0.137084
ST_R_K	0.00978494	0.393188	-0.0363469	0.0517557	-0.165185	0.0686192	-0.113812	0.0232441
ST_S_K	-0.132475	0.050823	0.10452	0.374867	0.0397666	0.0214523	0.0844304	-0.420909
ST_ShvsR_K	-0.0217105	-0.339519	0.0320335	0.061524	0.00257328	-0.0549065	0.279235	-0.132279
ST_L_Mg	0.0681745	0.177183	0.146067	0.197241	0.138024	-0.165583	-0.25968	-0.369083
ST_R_Mg	0.055266	0.380716	0.000431061	-0.0637134	-0.10653	0.120402	-0.017636	-0.121335
ST_S_Mg	0.116536	0.215431	-0.0984237	0.212145	-0.265279	-0.0999868	-0.224268	-0.00954704
ST_ShvsR_Mg	0.0282435	-0.273899	-0.0191612	0.196004	-0.034404	-0.294188	-0.198017	0.0372933
ST_L_Na	0.307219	-0.104692	-0.0410924	0.0100426	-0.0868213	-0.0112218	-0.016522	-0.00886485
ST_R_Na	0.0813813	0.229837	-0.304498	0.13174	-0.174417	0.291923	-0.0392679	-0.0581929
ST_S_Na	0.30487	0.0739851	0.0274962	0.152761	-0.143077	0.117929	0.10365	-0.0715931
ST_ShvsR_Na	0.24776	-0.172224	0.206919	-0.0207128	-0.0927249	-0.167641	0.0451048	-0.0554723
ST_L_KvsNa	-0.31733	0.0830556	0.0200825	0.0762578	0.0273598	-0.0437557	0.148617	0.125367
ST_R_KvsNa	-0.0982001	0.239105	0.313411	-0.0705358	0.0211825	-0.242686	-0.126351	0.0910142
ST_S_KvsNa	-0.318612	-0.0377217	-0.0404563	-0.0104504	0.165108	-0.0271515	-0.0664485	-0.115265
ST_L_MgvsNa	-0.303369	0.158984	0.0435527	0.0416658	0.11135	-0.0416728	0.0374142	0.0443266
ST_R_MgvsNa	-0.0544797	0.195365	0.354726	-0.200343	0.0388305	-0.162544	0.0104525	-0.0693572
ST_S_MgvsNa	-0.279061	-0.00192491	-0.106911	-0.0490963	0.136846	-0.187014	-0.270758	0.0764759
RISC_LvsS_K	-0.158702	0.208616	-0.0381567	0.111342	-0.23368	-0.0345523	0.285159	0.228414
RISC_SvsR_K	-0.196096	-0.114157	-0.260313	0.0590734	0.185133	0.161948	-0.0309444	-0.283819
RISC_LvsS_Mg	-0.206059	0.165511	0.190808	0.0812985	0.13817	0.103468	0.272398	-0.108992
RISC_SvsR_Mg	-0.161503	-0.07152	-0.371905	0.0515797	0.0421465	0.0623585	-0.333777	-0.0579584
Standard deviation	2.817	2.334	1.918	1.6886	1.6239	1.3609	1.278	1.181
Proportion of Variance	0.233	0.16	0.108	0.0839	0.0776	0.0545	0.048	0.041
Cumulative Proportion	0.233	0.394	0.502	0.5857	0.6633	0.7177	0.766	0.807
Weight coefficient	0.288724	0.198265	0.133829	0.103965	0.0961586	0.0675341	0.0594796	0.0508055

## Sheet: S1c
	Table S1C: Comprehensive evaluation of salt tolerance CSTI (Comprehensive Salt Tolerance Index) values for 45 genotypes of Gossypium purpurascens
	Varity ID	Rank	Varityname	STCI	Salt tolerance evaluation	Var
	K411	1	Liuluomian-2	0.660864	Salt resistance	Gossypium purpurascens
	K413	2	Techengdao Wild Cotton-5	0.592343	Salt resistance	Gossypium purpurascens
	K407	3	Zhanjiang Local Species -3	0.369506	Salt tolerent	Gossypium purpurascens
	K429	4	Tanbeisha local species	0.305362	Salt tolerent	Gossypium purpurascens
	K412	5	Leizhou Wild Cotton	0.297599	Salt tolerent	Gossypium purpurascens
	K392	6	Lianjiang Wild 1-3	0.292734	Salt tolerent	Gossypium purpurascens
	K410	7	Liuluomian-1	0.283218	Salt tolerent	Gossypium purpurascens
	K388	8	Jialu-2	0.27216	Salt tolerent	Gossypium purpurascens
	K430	9	Yongxingmian	0.254244	Salt tolerent	Gossypium purpurascens
	K408	10	Mazhang Wild Cotton	0.229658	Salt tolerent	Gossypium purpurascens
	K424	11	Jialu-3	0.219909	Salt tolerent	Gossypium purpurascens
	K426	12	Jialu-7	0.201681	Salt tolerent	Gossypium purpurascens
	K406	13	Zhanjiang Local Species -2	0.199559	Salt tolerent	Gossypium purpurascens
	K389	14	Honggongmian-1	0.193693	Salt tolerent	Gossypium purpurascens
	K386	15	Nayanmian-2	0.192409	Salt tolerent	Gossypium purpurascens
	K393	16	Jialu-9	0.191972	Salt tolerent	Gossypium purpurascens
	K372	17	Zhong9807(Salt tolerant genotype, control)	0.190866	Salt tolerent	Gossypium hirsutum
	K385	18	Nayanmian-1	0.188391	Salt tolerent	Gossypium purpurascens
	K404	19	Sansha Rainwater-2	0.186828	Salt tolerent	Gossypium purpurascens
	K387	20	Nayanmian-3	0.186101	Salt tolerent	Gossypium purpurascens
	K428	21	Six Bamboo Local Species	0.170625	Salt tolerent	Gossypium purpurascens
	K417	22	Sansha Hospital -1	0.150516	Salt sensitive	Gossypium purpurascens
	K395	23	Sanshagaopao-1	0.143782	Salt sensitive	Gossypium purpurascens
	K405	24	Zhanjiang Naozhou Jialu-1	0.141287	Salt sensitive	Gossypium purpurascens
	K396	25	Sanshagaopao-2	0.134755	Salt sensitive	Gossypium purpurascens
	K402	26	Sansha Hospital -2	0.131363	Salt sensitive	Gossypium purpurascens
	K403	27	Sansha Rainwater-1	0.123621	Salt sensitive	Gossypium purpurascens
	K422	28	Jialu-13	0.120815	Salt sensitive	Gossypium purpurascens
	K397	29	Sanshagaopao-3	0.11557	Salt sensitive	Gossypium purpurascens
	K416	30	Sansha hangar	0.113105	Salt sensitive	Gossypium purpurascens
	K399	31	Sanshanan Fisherman Village-1	0.104181	Salt sensitive	Gossypium purpurascens
	K427	32	That banquet place grows	0.102378	Salt sensitive	Gossypium purpurascens
	K401	33	Sanshanan Fisherman Village-3	0.0998233	Salt sensitive	Gossypium purpurascens
	K394	34	Wild Cotton Processing Factory-1	0.0882202	Salt sensitive	Gossypium purpurascens
	K423	35	Jialu-2	0.0841514	Salt sensitive	Gossypium purpurascens
	K421	36	Jialu-12	0.0835154	Salt sensitive	Gossypium purpurascens
	K419	37	Sansha Rainwater-3	0.0814606	Salt sensitive	Gossypium purpurascens
	K400	38	Sanshanan Fisherman Village-2	0.0698766	Salt sensitive	Gossypium purpurascens
	K390	39	Honggongmian-2	0.0509405	Salt sensitive	Gossypium purpurascens
	K425	40	Techeng Island endemic species	0.0477138	Salt sensitive	Gossypium purpurascens
	K420	41	Jialu-1	0.0424462	Salt sensitive	Gossypium purpurascens
	K414	42	Sansha Airport -2	0.0415049	Salt sensitive	Gossypium purpurascens
	K415	43	Sansha Airport -3	0.0376572	Salt sensitive	Gossypium purpurascens
	K398	44	Sansha Airport -1	0.027683	Salt sensitive	Gossypium purpurascens
	K391	45	Techengdao Wild Cotton -4	0.0058216	Salt sensitive	Gossypium purpurascens
	K418	46	Sansha Hospital -1	0.00265519	Salt sensitive	Gossypium purpurascens
