# Supplementary material for: Comprehensive Evaluation and Transcriptome Analysis Reveal the Salt Tolerance Mechanism in Semi-Wild Cotton (Gossypium purpurascens)
Source: Int J Mol Sci. 2023 Aug 16;24(16):12853. doi: 10.3390/ijms241612853 (PMC10454576; doi:10.3390/ijms241612853)
Supplement: Supplementary file 1 [file ijms-24-12853-s001.zip › Table S2.xlsx]

## Sheet: S2a-AllSample_GC.stat
	TableS2a: Sequencing data Statistics
	#SampleID	ReadSum	BaseSum	GC(%)	Q30(%)
	GP2-00-1	24136332	7222590454	44.27	96.25
	GP2-00-2	26209379	7842422390	44.12	96.45
	GP2-00-3	25223967	7550709072	44.36	96.31
	GP2-05-1	26852044	8034513918	44.23	96.52
	GP2-05-2	28458801	8518227826	44	96.58
	GP2-05-3	26388169	7897479926	43.95	96.21
	GP2-12-1	23905878	7151412932	43.54	96.4
	GP2-12-2	23286431	6964441474	43.57	96.74
	GP2-12-3	27445128	8215757824	43.27	94.89
	GP2-24-1	29447039	8807410940	43.84	96.32
	GP2-24-2	26509275	7929003336	44.09	96.26
	GP2-24-3	29281314	8758686078	43.71	96.68
	GP2-3-1	24103029	7209749790	44.23	95.81
	GP2-3-2	27125333	8118732700	43.94	96.22
	GP2-3-3	27797785	8315253862	44.24	96.36
	NY2-00-1	29302314	8761574686	44.33	96.2
	NY2-00-2	26446704	7912067150	44.26	96.73
	NY2-00-3	28456612	8506004788	44.54	96.76
	NY2-05-1	19802431	5926642058	44.03	96.38
	NY2-05-2	27885376	8339840352	43.94	96.21
	NY2-05-3	21594108	6459948386	43.83	96.28
	NY2-12-1	21502331	6435666984	43.5	96.14
	NY2-12-2	27122177	8116138798	43.51	96.65
	NY2-12-3	21822186	6531258174	43.44	96.26
	NY2-24-1	28454750	8510613308	43.66	96.29
	NY2-24-2	20953771	6266435934	43.59	96.59
	NY2-24-3	24764227	7403190626	43.74	96.09
	NY2-3-1	20383845	6096981764	43.9	96
	NY2-3-2	26926181	8057288840	43.82	96.26
	NY2-3-3	26581066	7955465518	44.1	96.38

## Sheet: S2b-Mapped stat
	Table S2b: Statistics on data mapping
	Sample	Total Reads	Mapped Reads	Uniq Mapped Reads	Multiple Map Reads	Reads Map to '+'	Reads Map to '-'
	GP2-00-1	48272664	47,571,328 (98.55%)	44,838,417 (92.89%)	2,732,911 (5.66%)	26,426,969 (54.75%)	26,407,214 (54.70%)
	GP2-00-2	52418758	51,719,873 (98.67%)	49,170,972 (93.80%)	2,548,901 (4.86%)	27,954,398 (53.33%)	27,928,315 (53.28%)
	GP2-00-3	50447934	49,785,871 (98.69%)	47,257,020 (93.67%)	2,528,851 (5.01%)	27,073,404 (53.67%)	27,049,087 (53.62%)
	GP2-05-1	53704088	52,954,281 (98.60%)	49,153,883 (91.53%)	3,800,398 (7.08%)	30,929,968 (57.59%)	30,908,638 (57.55%)
	GP2-05-2	56917602	56,121,150 (98.60%)	53,188,734 (93.45%)	2,932,416 (5.15%)	30,732,132 (53.99%)	30,705,880 (53.95%)
	GP2-05-3	52776338	52,026,873 (98.58%)	49,214,155 (93.25%)	2,812,718 (5.33%)	28,645,749 (54.28%)	28,622,917 (54.23%)
	GP2-12-1	47811756	47,234,616 (98.79%)	44,782,468 (93.66%)	2,452,148 (5.13%)	25,988,294 (54.36%)	25,970,681 (54.32%)
	GP2-12-2	46572862	46,030,418 (98.84%)	43,385,937 (93.16%)	2,644,481 (5.68%)	25,829,054 (55.46%)	25,812,967 (55.42%)
	GP2-12-3	54890256	52,078,690 (94.88%)	49,491,369 (90.16%)	2,587,321 (4.71%)	28,404,138 (51.75%)	28,455,219 (51.84%)
	GP2-24-1	58894078	58,151,968 (98.74%)	53,828,929 (91.40%)	4,323,039 (7.34%)	34,159,690 (58.00%)	34,132,109 (57.96%)
	GP2-24-2	53018550	52,308,478 (98.66%)	48,264,290 (91.03%)	4,044,188 (7.63%)	31,130,951 (58.72%)	31,109,471 (58.68%)
	GP2-24-3	58894078	57,695,024 (97.96%)	53,313,856 (90.52%)	4,381,168 (7.44%)	31,875,793 (54.12%)	31,868,318 (54.11%)
	GP2-3-1	48206058	47,557,980 (98.66%)	44,261,538 (91.82%)	3,296,442 (6.84%)	27,473,136 (56.99%)	27,460,264 (56.96%)
	GP2-3-2	54250666	53,513,286 (98.64%)	50,813,069 (93.66%)	2,700,217 (4.98%)	29,009,091 (53.47%)	28,989,887 (53.44%)
	GP2-3-3	55595570	54,854,115 (98.67%)	51,639,175 (92.88%)	3,214,940 (5.78%)	30,514,614 (54.89%)	30,494,474 (54.85%)
	NY2-00-1	58604628	57,801,574 (98.63%)	54,679,668 (93.30%)	3,121,906 (5.33%)	31,537,240 (53.81%)	31,512,803 (53.77%)
	NY2-00-2	52893408	52,160,365 (98.61%)	49,648,441 (93.87%)	2,511,924 (4.75%)	27,958,438 (52.86%)	27,947,635 (52.84%)
	NY2-00-3	56913224	56,123,472 (98.61%)	52,408,074 (92.08%)	3,715,398 (6.53%)	31,880,779 (56.02%)	31,858,435 (55.98%)
	NY2-05-1	39604862	39,134,590 (98.81%)	37,011,771 (93.45%)	2,122,819 (5.36%)	21,565,118 (54.45%)	21,547,264 (54.41%)
	NY2-05-2	55770752	54,972,104 (98.57%)	52,226,152 (93.64%)	2,745,952 (4.92%)	29,663,050 (53.19%)	29,641,785 (53.15%)
	NY2-05-3	43188216	42,605,515 (98.65%)	40,551,412 (93.89%)	2,054,103 (4.76%)	22,948,651 (53.14%)	22,928,676 (53.09%)
	NY2-12-1	43004662	42,406,051 (98.61%)	40,322,874 (93.76%)	2,083,177 (4.84%)	23,112,046 (53.74%)	23,096,035 (53.71%)
	NY2-12-2	54244354	53,553,610 (98.73%)	50,732,646 (93.53%)	2,820,964 (5.20%)	29,490,696 (54.37%)	29,477,439 (54.34%)
	NY2-12-3	43644372	43,029,824 (98.59%)	40,849,246 (93.60%)	2,180,578 (5.00%)	23,578,944 (54.03%)	23,568,795 (54.00%)
	NY2-24-1	56909500	56,164,004 (98.69%)	53,101,926 (93.31%)	3,062,078 (5.38%)	30,995,335 (54.46%)	30,977,914 (54.43%)
	NY2-24-2	41907542	41,308,434 (98.57%)	38,896,270 (92.81%)	2,412,164 (5.76%)	23,113,935 (55.15%)	23,100,515 (55.12%)
	NY2-24-3	49528454	48,845,755 (98.62%)	45,774,951 (92.42%)	3,070,804 (6.20%)	27,714,503 (55.96%)	27,698,766 (55.92%)
	NY2-3-1	40767690	40,175,461 (98.55%)	37,949,149 (93.09%)	2,226,312 (5.46%)	22,129,087 (54.28%)	22,117,413 (54.25%)
	NY2-3-2	53852362	53,135,337 (98.67%)	50,204,880 (93.23%)	2,930,457 (5.44%)	29,368,748 (54.54%)	29,353,152 (54.51%)
	NY2-3-3	53162132	52,512,090 (98.78%)	49,312,588 (92.76%)	3,199,502 (6.02%)	29,580,555 (55.64%)	29,565,338 (55.61%)

## Sheet: S2c-05h TF-DEG
GeneID	Family	Type	gene_name	nr_symbol	GP2-00-1_FPKM	GP2-00-2_FPKM	GP2-00-3_FPKM	GP2-05-1_FPKM	GP2-05-2_FPKM	GP2-05-3_FPKM	GP2-12-1_FPKM	GP2-12-2_FPKM	GP2-12-3_FPKM	GP2-24-1_FPKM	GP2-24-2_FPKM	GP2-3-1_FPKM	GP2-3-2_FPKM	GP2-3-3_FPKM	NY2-00-1_FPKM	NY2-00-2_FPKM	NY2-00-3_FPKM	NY2-05-1_FPKM	NY2-05-2_FPKM	NY2-05-3_FPKM	NY2-12-1_FPKM	NY2-12-2_FPKM	NY2-12-3_FPKM	NY2-24-1_FPKM	NY2-24-2_FPKM	NY2-24-3_FPKM	NY2-3-1_FPKM	NY2-3-2_FPKM	NY2-3-3_FPKM	GP2-00_vs_GP2-05_DESeq2_FDR	GP2-00_vs_GP2-05_DESeq2_log2FC	GP2-00_vs_GP2-05_DESeq2_(FDR_0.05_FC_2)_regulated	GP2-05_vs_GP2-3_DESeq2_FDR	GP2-05_vs_GP2-3_DESeq2_log2FC	GP2-05_vs_GP2-3_DESeq2_(FDR_0.05_FC_2)_regulated	GP2-12_vs_GP2-24_DESeq2_FDR	GP2-12_vs_GP2-24_DESeq2_log2FC	GP2-12_vs_GP2-24_DESeq2_(FDR_0.05_FC_2)_regulated	GP2-3_vs_GP2-12_DESeq2_FDR	GP2-3_vs_GP2-12_DESeq2_log2FC	GP2-3_vs_GP2-12_DESeq2_(FDR_0.05_FC_2)_regulated	NY2-00_vs_NY2-05_DESeq2_FDR	NY2-00_vs_NY2-05_DESeq2_log2FC	NY2-00_vs_NY2-05_DESeq2_(FDR_0.05_FC_2)_regulated	NY2-05_vs_NY2-3_DESeq2_FDR
Gh_D11G203500	B3	Up	Os12g0591400	LOC107913128	0.182585	0.424361	0.126874	0.603328	1.14777	0.899963	1.0211	0.859097	1.57863	0	0.043469	0.957816	1.13322	0.933333	0.592915	0.473083	0.166338	1.6508	1.03792	1.24814	2.12854	1.76762	2.29904	1.13646	0.961765	1.53571	1.83051	1.25551	0.787517	--	--	--	--	--	--	2.79664e-05	-5.1789	down	0.704731	-0.173266	normal	0.00366553	1.59941	up	0.945732
Gh_A05G054300	bHLH	Up	BHLH122	LOC108470847	31.9148	32.8805	33.1379	50.4054	50.6461	68.9633	27.3077	27.0567	28.8477	19.0008	20.6905	52.656	54.8798	47.2321	30.1044	25.8103	26.113	58.5545	59.3913	61.3172	46.8626	46.8708	42.4521	44.1059	49.9334	43.3732	58.9241	73.2635	67.7087	1.5775e-05	0.844258	normal	0.402071	-0.192208	normal	0.292612	0.137013	normal	5.14107e-43	-1.24468	down	2.99622e-26	1.07549	up	0.281589
Gh_D05G070600	bHLH	Up	BHLH122	LOC107906714	19.9894	20.9857	19.7182	27.3199	27.9675	39.3869	16.7505	15.3731	17.9955	9.6973	9.84055	23.6811	28.9264	22.6425	16.7726	13.5816	13.4879	31.0292	30.5763	30.8999	32.3609	29.0997	27.8402	21.0525	23.6932	20.5949	31.5594	33.8182	34.7487	0.000864993	0.692275	normal	0.0844183	-0.389878	normal	0.268744	-0.149512	normal	5.08041e-18	-0.935868	normal	8.71294e-20	1.02496	up	0.371312
Gh_A06G024700	C2H2	Up	ZAT10	LOC107930582	1.38555	1.00523	2.58792	1.48043	0.873819	1.04624	2.03837	1.26501	1.79514	0.327382	0.916223	1.42169	1.44823	2.24957	2.32187	1.65092	2.18451	3.98664	3.4312	5.48878	3.76101	3.80226	6.26569	2.15533	2.96999	3.36481	3.2881	3.73856	5.27724	0.412089	-0.534174	normal	0.298841	0.549143	normal	0.14804	-0.844415	normal	0.372682	-0.37075	normal	0.000880399	1.00552	up	0.866412
Gh_A09G191800	Dof	Up	DOF5.6	LOC107933618	1.08014	1.24896	1.47152	1.25548	1.56309	1.15444	1.23398	1.14925	1.10555	0.218144	0.724486	1.41145	1.42485	0.749269	0.987948	0.611657	0.608146	1.78198	1.61491	1.72576	1.01588	1.26711	0.915363	0.449893	0.328706	0.556473	1.83996	1.20786	1.28118	0.846219	0.0999074	normal	0.731674	-0.212744	normal	0.294702	-0.718036	normal	0.433249	-0.36201	normal	0.00627107	1.15634	up	0.522756
Gh_A08G192800	ERF	Up	ERF038	LOC107934071	7.47183	7.43979	5.95116	11.5157	13.7847	13.0756	3.58377	2.34599	3.18795	1.50902	1.79319	7.75861	6.63951	7.40749	8.8697	8.57962	8.52848	17.4209	17.1222	19.9089	7.59268	6.27583	6.68038	4.13723	3.63894	4.18181	14.307	11.6655	10.6012	6.39088e-07	0.933099	normal	5.52262e-06	-0.865329	normal	0.540661	-0.260153	normal	1.95296e-10	-1.60578	down	3.31678e-11	1.01487	up	0.00091358
Gh_D08G189000	ERF	Up	ERF038	--	3.86718	2.1767	4.09403	6.37503	6.3259	6.33064	2.44859	1.0929	2.1008	0.779435	0.485147	5.71545	3.60207	5.40261	2.94195	2.24379	2.92915	9.80305	8.30363	7.34711	4.44929	4.54082	4.97327	3.05906	1.75846	2.78655	5.0965	4.95498	6.13123	0.0137626	0.939603	normal	0.225057	-0.418261	normal	0.149766	-0.914459	normal	7.17146e-06	-1.74552	down	1.11277e-10	1.58077	up	0.00582465
Gh_A13G244500	GRAS	Up	SCL3	LOC107939446	0.889243	0.803511	0.54627	1.09848	1.18468	1.83127	1.68637	1.55645	2.76592	1.20848	1.04631	1.60098	1.52301	1.53471	1.28349	0.882047	0.896591	2.41958	2.04663	2.00584	2.01241	1.99276	2.13117	1.87319	1.9774	2.0726	1.23797	1.51301	1.49239	0.0289662	0.920912	normal	0.81058	0.121959	normal	0.656987	-0.187146	normal	0.999711	0.000155505	normal	0.00060434	1.01824	up	0.0237458
Gh_A11G053900	HD-ZIP	Up	HAT22	--	0.964632	0.632561	0.606426	0.89394	1.15633	0.571059	1.50606	1.39206	0.984161	0.351406	0.347328	0.966884	0.733554	0.461125	0.783161	0.73319	0.674721	1.08875	1.77355	2.22374	0.80673	1.52034	1.25852	1.10227	1.6704	1.93357	1.48649	1.19121	0.881134	--	--	--	--	--	--	0.0358299	-1.21869	down	--	--	--	0.00976049	1.15814	up	0.260503
Gh_A05G202200	MIKC_MADS	Up	MADS27	--	0.387402	1.28561	0.264058	0.915382	1.39063	1.65861	2.64886	2.26197	3.1143	0.65608	0.331331	1.68	1.35777	2.13678	0.472558	0.939589	0.577405	1.71473	1.86006	2.01049	4.04498	4.31073	3.04376	1.36983	1.16353	0.677987	1.14587	1.50727	1.45723	0.163098	1.10127	normal	0.580399	0.340188	normal	0.000574847	-1.73444	down	0.517745	0.25711	normal	0.00130337	1.43805	up	0.285173
Gh_D07G070700	M-type_MADS	Up	AGL65	LOC105787862	1.89003	1.72184	1.32662	2.15306	2.90609	2.70082	3.22627	2.99286	4.19536	1.76758	1.30514	2.8283	3.43535	2.96825	1.34976	1.36773	1.03981	2.40299	2.88543	3.52743	4.25917	3.08735	5.2545	3.59967	3.75761	2.62589	3.25222	3.27628	3.09519	0.0252718	0.70283	normal	0.572233	0.194661	normal	0.127529	-0.528647	normal	0.474243	-0.181663	normal	8.53885e-05	1.17802	up	0.704354
Gh_A07G088100	NAC	Up	JUB1	--	0.299304	0	0	0.400904	0.321321	0.183305	0.510722	0.086177	0.297717	0	0.114456	0.091611	0.040816	0.258021	0.457925	0.260211	0.168209	1.4325	1.1962	1.21842	1.1118	1.08348	1.60546	0.649584	1.77206	1.44237	0.38604	1.47575	1.00495	--	--	--	--	--	--	--	--	--	--	--	--	7.50701e-05	2.03476	up	0.516722
Gh_A07G223100	NAC	Up	NAC091	--	2.22757	2.34018	2.29636	2.65648	4.5943	3.8602	7.77978	8.05384	8.24552	3.15302	3.97442	3.64695	4.30428	2.05399	3.34758	2.34933	2.07435	5.82377	5.87164	6.93195	5.71044	5.18166	6.37524	7.52233	7.90597	5.98918	5.47419	6.80592	7.87385	0.0126621	0.738466	normal	0.660654	-0.213925	normal	0.00294437	-0.554104	normal	0.000292763	0.930058	normal	3.87739e-08	1.20687	up	0.659311
Gh_D07G087300	NAC	Up	JUB1	--	0.285259	0	0.34644	0.696912	0.707761	0.678706	0.732949	0.471379	0.25013	0.346223	0.21661	0.224064	0	0.164111	1.26118	0.532611	0.542303	1.96895	2.05591	2.39699	1.66984	1.52101	2.62992	1.59729	2.90506	2.30033	1.00083	1.78019	1.37625	--	--	--	--	--	--	--	--	--	--	--	--	0.00166136	1.39164	up	0.0833938
Gh_D01G221200	NF-YA	Up	NFYA10	LOC107928144	3.41838	2.31319	3.8783	4.7141	4.9125	6.43855	4.00631	3.08516	3.61702	3.65362	2.76739	3.50389	2.88222	3.25002	3.0821	2.73421	2.6667	7.2773	5.71234	5.36042	5.79864	4.20397	5.07209	5.62924	7.68199	6.99435	3.18684	4.85942	5.30338	0.0332198	0.772376	normal	0.00234606	-0.786305	normal	0.126202	0.478098	normal	0.447023	-0.203318	normal	1.01937e-06	1.05676	up	0.120431
Gh_Contig00580G001000	NF-YB	Up	NFYB3	LOC107951661	0.656279	0.264016	0.462098	1.70466	0.751043	1.80958	0.566492	0.432965	1.00835	0.072453	0.116892	2.61032	2.1907	3.99826	0.260001	0.455961	0.315663	3.55816	2.0755	2.39274	1.37133	1.03212	1.15207	0.634462	1.26857	1.0886	5.00323	5.27176	2.75919	--	--	--	0.0742062	1.00135	normal	--	--	--	9.21097e-08	-2.48396	down	2.94077e-10	2.90326	up	0.0711794
Gh_A06G200600	OFP	Up	OFP13	--	2.3187	2.9712	2.24915	4.24525	3.29699	3.14436	3.54862	2.08723	3.61151	1.52427	1.45103	5.55177	5.23567	5.77652	2.43813	1.44591	1.82395	4.48884	3.70916	6.18757	3.58622	3.45082	3.7408	2.38398	2.86218	2.30415	1.54951	3.50415	2.8306	0.0802925	0.560315	normal	0.0396179	0.580554	normal	0.353882	-0.4043	normal	1.52123e-05	-1.20227	down	0.000226679	1.27579	up	0.0292023
Gh_D06G203600	OFP	Up	OFP13	--	2.76753	4.63959	2.33595	6.12871	5.80787	4.62225	4.77446	3.40324	6.58126	2.00909	1.29622	7.40462	8.2384	6.96047	2.60662	3.1332	2.14718	7.07701	7.0572	7.75374	6.65106	5.68024	6.10506	5.21941	5.80565	5.05997	3.20683	5.59395	3.75289	0.0161967	0.832944	normal	0.112175	0.392949	normal	0.0298751	-0.918663	normal	0.000122627	-0.973995	normal	1.63681e-10	1.42278	up	0.0025903
Gh_D09G227500	OFP	Up	OFP1	--	1.19808	5.25137	0.699459	2.63582	2.07489	2.80826	1.19743	1.76904	2.39954	0	0.047313	1.65926	1.97214	1.26646	1.9061	3.30878	1.74226	5.51291	5.29061	4.15378	4.93983	3.34451	2.54217	2.67293	2.42909	2.6575	1.61502	2.6862	2.4337	0.842305	0.190898	normal	0.0595204	-0.674192	normal	2.37348e-06	-5.68633	down	0.589103	-0.230297	normal	0.000318116	1.06582	up	4.45023e-05
Gh_A07G020100	R2R3-MYB	Up	TT2	LOC107929869	11.4181	10.9435	11.7458	22.8019	12.0448	14.4038	9.33403	5.70863	11.8952	0.687864	1.87616	13.2919	8.95749	10.7298	19.401	13.3781	14.9988	39.6448	31.5703	28.3908	20.0045	15.0528	22.6374	5.3583	4.87649	6.07118	7.91578	8.7778	9.39656	0.083884	0.580329	normal	0.0702197	-0.633202	normal	5.11592e-07	-2.18743	down	0.0206391	-0.662876	normal	2.94608e-08	1.00346	up	5.73049e-31
Gh_A08G040700	R2R3-MYB	Up	MYB3	--	1.87829	3.27603	0.625036	3.56701	0.853484	1.99266	0.280638	0.076528	0.809993	0	0	3.00447	4.24528	1.52316	1.89373	1.72846	1.77069	7.30394	5.7167	4.1686	0.431419	0.280351	0.299334	0.117935	0	0	1.1066	1.67683	1.91228	0.782999	0.258205	normal	0.65724	0.365456	normal	--	--	--	2.26309e-07	-3.22336	down	7.36771e-11	1.61113	up	5.11781e-10
Gh_D01G168900	R2R3-MYB	Up	MYB4	LOC107921404	0.507559	1.37858	0.525679	1.52437	0.434783	0.929763	0.051909	0	0.504666	0	0	0.691156	1.049	0.431239	1.47134	1.0735	1.54217	4.10628	4.92937	3.27082	0.996533	0.696203	0.737877	0	0	0	0.399773	0.909655	0.541785	--	--	--	--	--	--	--	--	--	--	--	--	1.70086e-06	1.53263	up	4.64504e-13
Gh_D08G122700	R2R3-MYB	Up	MYB7	LOC107911458	0.746118	1.05405	0.514156	0.588163	0	0.200004	0	0	0.043365	0	0	0.204194	0.698098	0	1.33388	0.752556	0.772605	2.91347	2.54054	2.04323	0	0	0	0.113315	0	0.045713	0	0.063598	0	--	--	--	--	--	--	--	--	--	--	--	--	0.000385519	1.31743	up	4.37156e-14
Gh_D08G257100	R2R3-MYB	Up	MYB63	LOC107928276	0	0.4776	0.308377	1.22453	0.550624	2.10627	0.475443	0.344244	0.787543	0.146844	0.18576	0.950135	0.371854	0.392841	0.84245	0.480374	0.299862	1.58816	2.24861	1.57225	0.656458	0.654715	0.406459	0.123064	0.261741	0.093474	0.733299	0.96337	0.41409	--	--	--	--	--	--	--	--	--	--	--	--	0.000518207	1.66522	up	0.00182207
Gh_D01G170200	SBP	Up	TGA1	LOC107921105	0.238323	0.723289	0.400061	0.535861	0.515986	0.208802	1.16429	0.521844	1.10618	0.043253	0.04796	1.07142	0.477974	0.615747	0.490351	0.857615	0.395283	1.16763	1.35415	1.28807	1.53009	1.64586	1.92267	1.09798	1.09647	0.641019	0.772345	1.6299	2.49144	--	--	--	--	--	--	0.000533767	-3.16968	down	0.997944	0.00177964	normal	0.0289145	1.08218	up	0.532359
Gh_A06G095800	WRKY	Up	WRKY50	LOC107962839	0.930175	0.628359	0.328118	0.944365	1.2085	2.47818	1.58034	1.24106	2.14221	0.116042	0.76535	1.94215	1.64307	2.56242	4.57549	3.12895	1.61282	9.82954	8.44858	13.2654	4.94484	7.34383	10.6762	4.96946	7.49559	6.14018	4.5158	7.16395	3.47186	--	--	--	--	--	--	--	--	--	--	--	--	3.46748e-06	1.70859	up	0.00127784
Gh_A07G021100	WRKY	Up	WRKY50	LOC107929964	0.704078	0	0.739923	0.736524	0.232367	1.03175	1.67641	1.07958	1.6227	0	0	1.60932	0.679062	0.851639	1.27412	1.31975	0.721001	4.18473	3.02899	4.34824	2.90734	2.48171	3.80296	2.75207	2.41937	2.90359	3.08222	4.01485	5.37661	--	--	--	--	--	--	--	--	--	--	--	--	1.02144e-05	1.74685	up	0.800337
Gh_A07G149100	WRKY	Up	WRKY46	LOC107948527	1.82775	1.28532	1.33481	2.56596	1.53614	2.86163	5.11279	5.28552	6.06396	1.64772	1.62393	1.95739	1.96558	2.71773	3.10044	2.24892	1.78909	7.10963	6.81774	8.87098	7.87007	6.1147	10.0739	3.54101	3.92848	4.44301	6.07484	7.2962	6.73119	0.0904132	0.693462	normal	0.842218	-0.111935	normal	1.73387e-07	-1.1128	down	6.04273e-05	0.939302	normal	4.13712e-13	1.62514	up	0.373417
Gh_A10G072900	WRKY	Up	WRKY51	LOC107897501	0	0	0	0.290457	0	0.22065	0.431363	0.537389	0.650742	0.391482	0.429407	0.438635	1.36569	0.156398	0.173703	0.044404	0	3.41988	2.28099	2.90149	1.51312	1.15008	2.39901	0.469333	0.461493	0.37893	0.977363	2.16747	1.45849	--	--	--	--	--	--	--	--	--	--	--	--	8.17763e-16	5.13748	up	0.0269128
Gh_A13G008300	WRKY	Up	WRKY70	LOC107959346	0.514267	0.6648	0.19821	0.907269	0.703219	0.591285	3.86098	3.07515	4.18535	1.77926	2.97991	2.14845	1.42478	0.906188	0.44341	1.30154	1.6538	6.75677	6.96578	7.5645	5.52106	5.7267	8.84251	0.591334	0.602486	0.648132	2.62677	3.66769	3.25106	--	--	--	0.0636919	0.959685	normal	0.949393	-0.0235844	normal	0.00763951	0.955193	normal	1.14881e-12	2.58933	up	4.82855e-09
Gh_D02G003800	WRKY	Up	WRKY70	LOC107903743	1.61963	1.94253	1.21907	1.58942	1.33978	2.56492	3.13111	2.9329	4.69205	1.10144	1.44668	4.00973	2.61031	3.32795	2.54454	2.40235	3.09841	7.30595	5.6164	6.57529	6.375	4.77105	9.17514	1.49583	1.65572	2.38699	3.78741	4.59928	4.2216	0.581707	0.268819	normal	0.0486942	0.803028	normal	0.0103737	-0.866526	normal	0.421165	-0.254723	normal	1.83489e-08	1.21442	up	0.00179201
Gh_D07G022300	WRKY	Up	WRKY50	LOC105802365	0.922725	0.302276	0.820111	2.77697	0.878242	1.142	1.34362	0.942643	2.76714	0	0.641944	2.37116	1.94427	2.06872	3.41427	2.32168	2.61574	8.28664	6.22155	7.3672	3.6586	3.16706	4.767	2.21803	3.15437	2.81288	4.52583	5.34885	5.89232	--	--	--	0.661173	0.355525	normal	--	--	--	0.174929	-0.705087	normal	2.55839e-06	1.33285	up	0.0857475
Gh_D07G149000	WRKY	Up	WRKY46	LOC107954500	2.33543	1.73409	1.89478	3.50075	2.5775	3.851	6.68517	7.14296	10.9395	2.36441	2.70971	5.16056	5.59304	5.22296	4.85142	4.76668	3.39449	15.5375	14.0615	18.7958	12.3684	12.4039	21.1734	8.65402	9.63979	11.1679	12.6253	12.9557	17.8359	0.0146782	0.784564	normal	0.0111061	0.629617	normal	6.31663e-05	-1.07035	down	0.233375	0.26831	normal	2.3672e-26	1.84806	up	0.548068
Gh_D11G103700	WRKY	Up	WRKY46	--	5.85997	4.29662	4.44799	8.28032	5.11338	7.33694	11.1987	9.3977	11.4612	1.6883	2.38746	8.26781	7.41343	7.62408	11.5939	9.6246	8.92494	21.343	19.1772	23.7833	17.5306	16.2987	17.1666	10.8626	14.5271	15.9342	21.6926	23.1155	20.5488	0.082021	0.555029	normal	0.757769	0.112689	normal	1.98746e-18	-1.77242	down	0.514226	0.104528	normal	2.05062e-13	1.04243	up	0.927242
Gh_A05G132400	ARF	Down	ARF6	LOC107958298	8.97321	7.56012	8.85015	7.62464	11.8377	12.6056	11.2616	12.0702	10.3016	14.8094	12.8936	9.63019	7.24577	6.64511	7.59918	7.67344	8.1601	3.26506	4.85485	3.46069	7.90513	9.08099	7.72887	9.77383	8.66928	9.31531	6.37921	8.56852	8.45121	0.196707	0.376402	normal	0.075745	-0.500137	normal	3.42583e-07	0.925724	normal	0.40764	0.17204	normal	6.10078e-11	-1.06589	down	8.72228e-07
Gh_D05G146400	ARF	Down	ARF6	--	4.61553	4.89482	3.6492	3.01138	5.1884	5.02347	6.26854	6.87412	5.32257	6.28836	6.16129	4.12849	3.1136	2.94356	3.30926	4.28229	3.45248	0.750133	1.70942	1.41528	4.52545	5.39761	4.84289	2.69686	1.74787	2.74547	2.62436	3.33929	3.56961	0.8638	0.0609637	normal	0.178847	-0.4284	normal	0.00183446	0.631674	normal	0.0173676	0.5162	normal	2.41784e-09	-1.54707	down	1.68742e-05
Gh_D11G105600	ARF	Down	ARF18	--	9.08327	15.1945	7.48821	4.08844	6.07857	5.11609	4.93508	4.2051	6.38383	1.72971	2.01845	5.06054	6.95988	4.00782	7.27389	12.277	8.88201	4.20959	4.8893	3.93839	5.02589	6.30339	4.72029	5.0497	5.14749	4.82699	4.3924	4.10128	3.14006	0.000878996	-0.980989	normal	0.973171	0.0146817	normal	0.00016806	-0.829458	normal	0.0741249	-0.4062	normal	6.80489e-11	-1.17472	down	0.368958
Gh_D01G123300	B3	Down	At5g42700	--	1.02585	10.4424	0.569497	0	0.29551	0.182541	0.254869	0.191571	0.643404	0.357116	0.123827	0.351964	0.966225	0	1.75137	5.16032	2.43016	0.489651	0.806566	0.46688	0.21177	0.868087	0.345976	0.073074	0.465423	0	0	0	0	--	--	--	--	--	--	--	--	--	--	--	--	1.62073e-07	-2.4025	down	--
Gh_D13G040800	B3	Down	At3g19184	LOC105782649	0.741672	5.396	0.207284	0.149176	0	0	0.186048	0.057594	0.455261	0.068371	0.16403	0.274912	0.212298	0	1.58718	5.03623	2.24864	0.134452	0.307058	0.213024	0	0.592982	0.077138	0.01864	0.565661	0	0.243768	0.150388	0.147343	--	--	--	--	--	--	--	--	--	--	--	--	4.70753e-13	-3.71636	down	--
Gh_A03G086000	bHLH	Down	BHLH72	--	1.41744	0.624259	1.72168	0.087636	0.252206	0.50136	0	0	0.109617	0	0	0	0	0.610298	1.6933	1.1871	1.30516	0.335683	0.132718	0.19856	0	0.097857	0.120896	0.045158	0.03832	0.070891	0	0	0.121724	--	--	--	--	--	--	--	--	--	--	--	--	1.99387e-08	-2.68941	down	--
Gh_A09G219200	bHLH	Down	BHLH94	LOC107935177	1.27941	9.07213	0.451586	0.069499	0.232681	0.30779	1.05617	0.562311	0.535828	1.63254	2.23688	0.530349	1.47507	0.161546	1.70852	5.02932	1.91821	0.324383	0.698934	0.097979	0.670829	1.64568	0.564344	0.754529	1.21146	0.322412	1.0504	0.638516	0.379374	--	--	--	--	--	--	2.03414e-05	2.02432	up	--	--	--	7.93234e-07	-2.90149	down	--
Gh_A13G034700	bHLH	Down	BHLH160	--	0.306803	0	0.451411	0	0	0	0	0	0.034699	0	0	0	0	0	1.28112	1.03405	1.49288	0.490821	0.464635	0.421708	0	0	0.089388	0.262549	0.251025	0.044674	0.041826	0.444743	0.37032	--	--	--	--	--	--	--	--	--	--	--	--	0.000366398	-1.49749	down	--
Gh_D09G210700	bHLH	Down	BHLH96	LOC107890608	1.03245	14.0284	0.158153	0	0.458181	0.166155	0.214598	0.379508	0.327237	3.40141	3.66064	0.164722	1.915	0	2.46626	9.65156	2.32691	0.259043	0.968794	0.15208	0.128029	1.3378	0.075123	0.314084	0.126371	0.375086	0.064854	0.065904	0.081325	--	--	--	--	--	--	4.00711e-29	4.09781	up	--	--	--	0.00151826	-3.38666	down	--
Gh_D12G271000	bHLH	Down	SPCH	--	0.242419	5.97625	0	0	0	0	0.311707	0.088875	0.168329	0	0	0	0.631269	0	1.09102	2.48041	0.91064	0.071764	0.109037	0	0	0.056805	0	0	0	0	0.052234	0	0	--	--	--	--	--	--	--	--	--	--	--	--	7.53413e-09	-4.45451	down	--
Gh_A13G234000	CPP	Down	TCX2	LOC107938620	0.348562	2.36606	0.256989	0.131033	0.244909	0.246801	1.03617	1.26572	1.29971	1.67665	1.59894	0	0.262116	0	0.759174	2.02068	0.718956	0.145572	0.253291	0.17017	0.60738	0.893122	0.781953	1.28605	0.984388	0.870496	0.161961	0.210032	0.045057	--	--	--	--	--	--	1.97613e-05	1.07106	up	0.157398	3.50966	normal	3.41463e-08	-2.60904	down	--
Gh_D05G199900	Dof	Down	DOF3.4	LOC105769325	1.97818	2.23132	1.15685	1.14678	0.991415	0.643941	0.891422	0.995929	0.664814	0.056683	0.189253	1.12337	0.950879	0.656993	1.78294	1.54616	1.96126	0.68102	0.946785	0.975275	1.36058	1.53174	1.09704	0.744015	0.54208	0.806136	0.674826	0.327915	0.252371	--	--	--	--	--	--	--	--	--	--	--	--	0.0149053	-1.04288	down	--
Gh_D11G374000	E2F/DP	Down	E2FA	LOC105761700	0.6997	1.50058	0.786077	0.856101	0.462677	1.03457	1.41631	1.76461	1.98466	1.04049	1.42631	0.873712	0.943314	0.784954	0.785039	1.07431	0.644647	0.157061	0.567816	0.358313	0.830927	0.926954	1.08643	1.09943	1.14831	0.660092	0.704988	0.40179	0.567149	0.686311	-0.263684	normal	0.903893	0.0877832	normal	0.73609	0.128833	normal	0.0422014	0.62716	normal	0.0340391	-1.18391	down	--
Gh_D07G049000	ERF	Down	ERF106	LOC107953621	1.19135	0.058181	0.060059	0.97642	0.380225	0.455943	0	0.71128	0	0.026222	0	0.32472	0.306384	0.879439	2.07921	2.96517	4.08157	0.690856	0.136461	0.204684	0.341166	0.399613	0.141045	0.425171	0.908502	1.0878	0.720244	0.504564	0.41464	--	--	--	--	--	--	--	--	--	--	--	--	1.1924e-08	-3.20572	down	--
Gh_D10G108100	ERF	Down	TINY	LOC107914394	5.82782	5.30284	7.70667	11.8796	5.65623	2.93843	18.8709	17.6011	21.4158	6.13675	7.21502	22.2488	15.3935	24.1861	13.731	21.0271	21.4949	3.59227	3.68717	5.03321	25.5756	16.3549	20.4656	21.848	13.9135	19.8344	20.02	12.0043	9.45795	0.823549	0.165171	normal	0.00222982	1.5431	up	2.4854e-06	-0.910113	normal	0.0579122	-0.463119	normal	3.69553e-20	-2.2344	down	2.84164e-08
Gh_D11G083300	ERF	Down	ERF034	--	2.0499	2.39476	1.54063	0.248359	1.59175	0.518997	0.587196	0.372672	0.408797	0	0	0.719393	1.58502	0.376013	1.74883	3.24256	2.13565	1.60468	1.42164	0.601156	0.35075	1.38817	0.774084	0.383829	0.210878	0.046233	0.268602	0.183248	0.096011	0.089204	-1.2834	normal	--	--	--	--	--	--	--	--	--	0.0261998	-1.00897	down	--
Gh_A02G096400	GRF	Down	GRF1	LOC107951424	0.400274	0.694717	0.176285	0.030575	0.229886	0.19491	0.712799	0.502318	0.777445	0.654284	0.872358	0.190204	0.440634	0.178135	0.633064	1.05152	0.620474	0.152874	0.161377	0.180003	1.06436	1.1328	0.765489	0.719604	0.547368	0.393742	0.462139	0.186224	0	--	--	--	--	--	--	0.0610299	0.808908	normal	--	--	--	9.02507e-06	-2.19641	down	--
Gh_A11G088400	GRF	Down	GRF9	LOC107924792	1.46209	2.00248	1.03658	1.58432	1.47491	1.52633	2.17191	1.74744	1.64158	1.01561	1.08746	1.74229	1.77123	1.28734	1.90644	3.02789	2.5551	1.23855	1.40675	0.920024	1.66053	1.98881	1.82908	1.4988	1.888	2.18442	1.95455	2.33871	2.28807	0.815082	0.0958783	normal	0.993382	0.0037418	normal	0.560453	-0.202738	normal	0.669424	-0.130487	normal	9.93593e-05	-1.11008	down	0.00129707
Gh_D05G035200	GRF	Down	GRF1	LOC107907106	0.16049	5.03888	0	0	0.018724	0	0.504531	0.257275	0.46809	0.698959	0.663896	0	1.66755	0	0.765185	2.9037	0.808188	0.364669	0.55137	0.205849	0	0.303961	0	0.060608	0.033186	0	0.156753	0	0	--	--	--	--	--	--	0.00889924	1.33879	up	--	--	--	0.000975411	-1.9852	down	--
Gh_D05G265300	GRF	Down	GRF6	LOC107905212	0.394172	2.16469	0	0	0.032735	0	0.239684	0.026124	0.806502	0	0	0	0.784961	0	0.526062	1.93517	0.596942	0.068337	0.252406	0.151945	0.442823	0.882348	0.398237	0	0.116314	0	0	0	0	--	--	--	--	--	--	--	--	--	--	--	--	4.53107e-05	-2.64721	down	--
Gh_D09G022200	HD-ZIP	Down	ATHB-20	LOC107893751	4.42685	2.6319	3.40591	1.52215	3.11955	0.886927	0	0	0.083264	0	0	2.0391	1.44443	0.663615	2.41693	3.67931	4.41352	0.437739	1.73659	1.68127	0	0.131997	0	1.03833	0.040479	0.301961	0.456465	0.36629	0	0.121382	-0.886899	normal	0.551684	-0.473383	normal	--	--	--	--	--	--	0.0013752	-1.48386	down	--
Gh_D08G270900	HRT-like	Down	ET2	--	0.731095	2.3076	0.440462	0.125379	0.220637	0.381943	0.404616	0.230519	0.526961	0.115623	0.339282	0.104265	0.510489	0.239653	0.704384	1.19838	0.908223	0.349293	0.72361	0.31537	0.662958	0.657818	0.347371	0.19372	0.310011	0.204709	0.085498	0.256511	0.193499	--	--	--	--	--	--	--	--	--	--	--	--	0.0301606	-1.03638	down	--
Gh_A11G233900	LBD	Down	LBD38	LOC107899435	9.21045	9.32943	8.77829	4.21753	4.72699	4.9722	11.3325	12.2688	12.3698	11.0239	14.0473	6.98539	5.10632	6.78551	13.247	13.06	12.2612	5.55175	5.52622	6.62742	13.556	13.1332	13.9411	15.924	12.748	14.1476	10.8423	7.65191	6.07572	1.05105e-08	-0.921862	normal	0.144183	0.393718	normal	5.15531e-05	0.677787	normal	0.00574123	0.570237	normal	2.88187e-17	-1.17217	down	0.0715412
Gh_D10G281900	LBD	Down	LBD21	--	2.06171	3.19617	2.28898	1.92397	2.39084	1.87386	0.281341	0.384599	0.750813	0	0	1.12774	1.5258	1.76781	1.67097	2.43276	1.72592	0.56846	0.98886	0.829288	0.538624	0.523124	0.186154	0.349611	0	0.375038	0.727218	0.569709	0.38383	0.598724	-0.219501	normal	0.249061	-0.535836	normal	--	--	--	--	--	--	0.00451347	-1.29073	down	--
Gh_D12G296800	LIM	Down	WLIM1	LOC105765750	1.65732	0.974296	1.94878	1.3407	1.26457	0.50829	1.86205	1.47566	1.62586	9.79701	6.84903	1.12988	0.404262	0.669299	2.05259	2.29725	2.86057	0.677474	0.886552	0.991833	2.7615	1.79593	1.68132	1.72165	1.93538	1.35252	0.986168	0.636742	0.384732	0.457598	-0.513129	normal	0.512936	-0.550963	normal	2.33374e-22	2.95425	up	0.116223	0.809912	normal	3.38513e-05	-1.52116	down	--
Gh_A01G119800	MYB_related	Down	RL6	LOC107917150	1.74149	1.27718	3.39444	1.70244	1.91284	2.73627	0	0	0	0	0	0.583143	0.226034	0.637556	5.67713	6.21043	5.46211	0	0.578716	0.72644	0	0	0	0	0	0	1.17654	1.55933	2.73567	--	--	--	--	--	--	--	--	--	--	--	--	7.69389e-10	-3.64638	down	--
Gh_D11G048300	MYB_related	Down	RL3	--	1.42812	0.429392	1.98022	0	0.493072	0.153378	0	0	0.252705	0	0	0.084232	0.181972	0.245401	3.05706	3.2485	3.34282	0	0.089982	0.108656	0	0.061616	0.167394	0.226341	0	0	0.305497	1.54062	2.10485	--	--	--	--	--	--	--	--	--	--	--	--	6.54868e-13	-5.2796	down	--
Gh_A05G068100	NF-YB	Down	POLE3	LOC108453356	1.66053	2.83464	1.59303	1.9826	2.16165	1.24322	2.1764	2.41803	2.34575	1.35049	1.01942	1.23173	1.16845	1.53646	1.83517	3.45477	3.16301	1.52914	1.57152	0.976907	2.66628	3.14351	2.03664	1.49114	1.82812	1.71554	1.70518	1.0458	1.19395	0.848378	-0.111708	normal	0.374051	-0.49182	normal	0.503775	-0.313313	normal	0.265774	0.44632	normal	0.011475	-1.08303	down	0.914551
Gh_A01G228200	OFP	Down	OFP13	--	1.03717	4.26896	0.782454	0	0	0.226179	0	0	0.174599	0	0	0	1.41805	0	1.107	2.71815	1.30249	0	0.045752	0.029599	0.029912	0.233672	0	0	0	0	0	0	0	--	--	--	--	--	--	--	--	--	--	--	--	2.04253e-09	-5.59575	down	--
Gh_A11G131400	OFP	Down	OFP12	LOC107912441	0.957132	1.16146	1.5768	0.794917	1.10364	0.571551	0.104595	0	0.139583	0	0	1.80901	1.16681	2.10845	2.90266	3.50483	2.30031	1.01839	1.40193	0.791451	0.701343	0.30189	0.104964	0.285404	0.113608	0.639149	0.887601	1.07752	0.107432	--	--	--	--	--	--	--	--	--	--	--	--	6.36778e-05	-1.44634	down	--
Gh_D13G267400	OFP	Down	OFP3	--	0.909977	1.0439	0.949002	0.395477	0.068322	0.06847	0.841826	1.3076	0.807084	0.287884	0.043742	0.704741	0.192338	0.943236	1.79013	1.83388	1.26886	0.554049	0.724498	0.392486	1.3763	0.971154	1.35226	0.604929	1.1916	0.522924	0.70925	0.086842	0	--	--	--	--	--	--	--	--	--	--	--	--	0.000309752	-1.54494	down	--
Gh_A06G092800	R2R3-MYB	Down	WER	LOC107962824	0.521972	0.389985	0.374579	0.05613	0.149864	0.117441	0	0	0.146709	0	0	0.320571	0.304388	1.86564	1.84849	2.20221	1.71427	0.978442	0.634664	0.58174	0.431845	0.230471	0	0.315787	0.253777	0.199459	0.541833	0.457136	1.01183	--	--	--	--	--	--	--	--	--	--	--	--	0.00178174	-1.43652	down	--
Gh_A07G230000	R2R3-MYB	Down	MYB30	LOC107955424	0.343765	1.92776	0.219692	0.082692	0	0	0.65516	0.329698	0.755029	0	0	0	1.33646	0	1.34569	2.89405	1.89372	0.46606	1.0383	0.622309	0.88009	2.07434	0.711107	0.207729	0	0	0.418643	0.095306	0	--	--	--	--	--	--	--	--	--	--	--	--	0.00134466	-1.53949	down	--
Gh_A11G238500	R2R3-MYB	Down	MYB44	--	9.81753	8.99762	11.0762	14.8614	9.94993	9.28613	27.9596	22.8545	28.3922	16.5887	19.6124	32.6389	24.5534	33.3662	13.3128	14.8421	16.0119	7.6469	8.08947	7.06301	18.2271	16.0551	19.7411	24.5082	22.8831	23.3961	24.4593	20.8113	21.0497	0.481169	0.235166	normal	7.85322e-08	1.35976	up	0.63615	0.0752825	normal	0.00246047	-0.557724	normal	5.54144e-16	-1.00673	down	1.09966e-38
Gh_D07G228100	R2R3-MYB	Down	MYB30	LOC121219568	0.27649	2.179	0	0	0	0.061982	0.261961	0	0.378828	0	0	0	2.34563	0.445961	1.50936	3.17288	1.35739	0.289158	1.19282	0.193856	0.167801	2.17195	0.16207	0	0	0	0.642125	0.291037	0.05789	--	--	--	--	--	--	--	--	--	--	--	--	0.00395872	-1.84724	down	--
Gh_D09G054600	R2R3-MYB	Down	ODO1	LOC107892095	1.19733	0.385345	1.22909	0.395257	1.4505	0.585916	0.044568	0.350846	0.330433	0	0.074921	0.843307	0.347801	0.224091	1.15234	1.04911	1.28533	0.356674	0.673223	0.39856	0.757773	0.887321	0.848395	1.2647	1.08537	0.657853	0.800397	0.672936	0.533652	0.833577	-0.210698	normal	--	--	--	--	--	--	--	--	--	0.00638208	-1.2965	down	--
Gh_A01G060700	SBP	Down	SPL4	LOC107917040	1.85968	1.43603	1.01793	0.417393	0.499293	0.487112	0	0	0	0	0	0.853685	0.410233	0.736548	1.76729	2.3565	2.60466	0.745578	1.23653	0.37082	1.05337	0.808074	0.849662	0.60106	0	0.48946	0.73497	0.102113	0	--	--	--	--	--	--	--	--	--	--	--	--	0.00456161	-1.52277	down	--
Gh_D01G054600	SBP	Down	SPL4	LOC105778902	1.88256	1.32175	2.00601	0.949373	0.944961	1.12652	0	0	0.043726	0	0	1.19586	0.178002	0.864139	1.86878	2.86036	2.3268	0.812216	0.796545	0.621733	0.214854	0.267132	0.133798	0	0	0.194377	1.78965	0.76553	1.03014	0.10943	-0.741462	normal	--	--	--	--	--	--	--	--	--	1.47126e-05	-1.68637	down	--
Gh_A07G257300	TCP	Down	TCP20	--	1.69158	1.06367	1.53727	0.686317	1.44277	1.03285	0.050462	0.151232	0.372741	0.187768	0.01429	0.96256	0.646618	0.829319	1.04079	1.60935	1.69965	0.465575	0.728175	0.414217	0.043433	0.38231	0.080465	0.344198	0.337414	0.70222	0.826244	0.578499	0.267463	0.490343	-0.395688	normal	--	--	--	--	--	--	--	--	--	0.00213284	-1.46537	down	--
Gh_D08G198700	TCP	Down	TCP19	--	4.10245	2.51387	3.53703	1.68592	1.96701	1.95807	6.55571	4.26244	5.19472	1.3796	2.32283	3.84774	2.80198	4.75133	3.0988	2.73721	2.94822	1.33287	1.72386	1.41585	7.16741	6.62989	6.73471	2.89068	3.65475	2.87727	4.61618	3.01295	3.10474	0.0227905	-0.818752	normal	0.00428872	0.982196	normal	0.00797359	-0.921811	normal	0.736059	0.121615	normal	0.000361456	-1.01649	down	3.98305e-05
Gh_A01G150800	Trihelix	Down	PTL	LOC107934460	2.28281	0.868137	1.9206	0.773361	1.09506	1.17449	0.363496	0.297929	0.548138	0.170842	0.22604	1.75338	0.537241	0.345223	1.04569	1.03639	1.42555	0.437937	0.524301	0.633709	0.351137	0.894886	0.547084	0.65796	0.530212	0.966727	0.699311	0.438645	0.312512	0.202342	-0.709374	normal	0.783148	-0.269111	normal	--	--	--	--	--	--	0.00218451	-1.1726	down	--
Gh_A11G085500	YABBY	Down	YAB1	LOC107911900	1.60619	8.73209	1.27842	0.227469	0.676262	0.947652	0.826322	0.195117	0.987598	0	0	0	0.558974	0.416849	3.54767	10.3228	3.34845	2.39926	2.99863	1.1827	1.72639	3.81233	0.96301	0.550652	0.261906	1.37609	0.711573	0.74585	0.559215	--	--	--	--	--	--	--	--	--	--	--	--	0.00497137	-1.4016	down	--
[truncated: 15 more columns]
