# Supplementary material for: Comprehensive Evaluation and Transcriptome Analysis Reveal the Salt Tolerance Mechanism in Semi-Wild Cotton (Gossypium purpurascens)
Source: Int J Mol Sci. 2023 Aug 16;24(16):12853. doi: 10.3390/ijms241612853 (PMC10454576; doi:10.3390/ijms241612853)
Supplement: Supplementary file 1 [file ijms-24-12853-s001.zip › Table S3.xlsx]

## Sheet: 0.5h-2776
ID	NO	gene_name	GP2-00_vs_GP2-05_DESeq2_FDR	GP2-00_vs_GP2-05_DESeq2_log2FC	GP2-00_vs_GP2-05_DESeq2_(FDR_0.05_FC_2)_regulated	GP2-00_vs_GP2-3_DESeq2_FDR	GP2-00_vs_GP2-3_DESeq2_log2FC	GP2-00_vs_GP2-3_DESeq2_(FDR_0.05_FC_2)_regulated	GP2-00_vs_GP2-12_DESeq2_FDR	GP2-00_vs_GP2-12_DESeq2_log2FC	GP2-00_vs_GP2-12_DESeq2_(FDR_0.05_FC_2)_regulated	GP2-00_vs_GP2-24_DESeq2_FDR	GP2-00_vs_GP2-24_DESeq2_log2FC	GP2-00_vs_GP2-24_DESeq2_(FDR_0.05_FC_2)_regulated	NY2-00_vs_NY2-05_DESeq2_FDR	NY2-00_vs_NY2-05_DESeq2_log2FC	NY2-00_vs_NY2-05_DESeq2_(FDR_0.05_FC_2)_regulated	NY2-00_vs_NY2-3_DESeq2_FDR	NY2-00_vs_NY2-3_DESeq2_log2FC	NY2-00_vs_NY2-3_DESeq2_(FDR_0.05_FC_2)_regulated	NY2-00_vs_NY2-12_DESeq2_FDR	NY2-00_vs_NY2-12_DESeq2_log2FC	NY2-00_vs_NY2-12_DESeq2_(FDR_0.05_FC_2)_regulated	NY2-00_vs_NY2-24_DESeq2_FDR	NY2-00_vs_NY2-24_DESeq2_log2FC	NY2-00_vs_NY2-24_DESeq2_(FDR_0.05_FC_2)_regulated	FC	GP2-00_vs_NY2-00_DESeq2_FDR	GP2-00_vs_NY2-00_DESeq2_log2FC	GP2-00_vs_NY2-00_DESeq2_(FDR_0.05_FC_2)_regulated	GP2-05_vs_NY2-05_DESeq2_FDR	GP2-05_vs_NY2-05_DESeq2_log2FC	GP2-05_vs_NY2-05_DESeq2_(FDR_0.05_FC_2)_regulated	GP2-3_vs_NY2-3_DESeq2_FDR	GP2-3_vs_NY2-3_DESeq2_log2FC	GP2-3_vs_NY2-3_DESeq2_(FDR_0.05_FC_2)_regulated	GP2-12_vs_NY2-12_DESeq2_FDR	GP2-12_vs_NY2-12_DESeq2_log2FC	GP2-12_vs_NY2-12_DESeq2_(FDR_0.05_FC_2)_regulated	GP2-24_vs_NY2-24_DESeq2_FDR	GP2-24_vs_NY2-24_DESeq2_log2FC	GP2-24_vs_NY2-24_DESeq2_(FDR_0.05_FC_2)_regulated	GO_annotation	KEGG_annotation	KEGG_pathway_annotation	Pfam_annotation	Swiss_Prot_annotation	NR_annotation	GO_second_level_annotation
Gh_A01G001100	1	AC101	0.45445	0.409987	normal	0.00164899	-1.32006	down	0.234073	0.544536	normal	5.13203e-17	3.123	up	0.00434182	-0.923917	normal	2.40053e-05	-1.11997	down	0.835967	-0.0549137	normal	0.756754	0.0871764	normal		0.478361	-0.471224	normal	0.00840306	-1.79727	down	0.595117	-0.290929	normal	0.000309045	-1.0695	down	7.51743e-80	-3.48259	down	Molecular Function: ATP binding (GO:0005524);; Cellular Component: cytoplasm (GO:0005737);; Cellular Component: cytoskeleton (GO:0005856);;	K10355|7.2e-217|ghi:107928884|K10355 actin, other eukaryote | (RefSeq) actin-100-like	--	Actin	Actin-101 OS=Solanum tuberosum OX=4113 GN=AC101 PE=3 SV=1	PREDICTED: actin-100-like [Gossypium raimondii]	molecular function: binding (GO:0005488);; cellular component: cell (GO:0005623);; cellular component: cell part (GO:0044464);; cellular component: organelle (GO:0043226)
Gh_A01G004600	2	KCS9	--	--	--	2.08346e-05	3.10836	up	1.51115e-09	3.90851	up	--	--	--	0.000766809	1.73208	up	--	--	--	4.9635e-20	3.0458	up	9.49777e-35	4.38858	up		--	--	--	0.262063	0.92984	normal	0.921953	0.097873	normal	2.44354e-05	0.790634	normal	4.1035e-21	3.09858	up	Biological Process: fatty acid biosynthetic process (GO:0006633);; Cellular Component: integral component of membrane (GO:0016021);; Molecular Function: transferase activity, transferring acyl groups other than amino-acyl groups (GO:0016747);;	K15397|3.0e-287|ghi:107936954|K15397 3-ketoacyl-CoA synthase [EC:2.3.1.199] | (RefSeq) 3-ketoacyl-CoA synthase 9-like	Fatty acid elongation (ko00062);; Plant-pathogen interaction (ko04626)	FAE1/Type III polyketide synthase-like protein	3-ketoacyl-CoA synthase 9 OS=Arabidopsis thaliana OX=3702 GN=KCS9 PE=2 SV=1	PREDICTED: 3-ketoacyl-CoA synthase 9-like [Gossypium hirsutum]	biological process: metabolic process (GO:0008152);; biological process: cellular process (GO:0009987);; biological process: single-organism process (GO:0044699);; cellular component: membrane (GO:0016020);; cellular component: membrane part (GO:0044425);; molecular function: catalytic activity (GO:0003824)
Gh_A01G006100	3	SRK2E	0.101252	0.817809	normal	0.220484	0.662324	normal	0.570057	-0.340584	normal	0.143269	-1.03096	normal	0.824406	0.122665	normal	8.11606e-05	1.30983	up	0.0477537	-0.820868	normal	0.550259	0.245109	normal		0.713916	-0.428306	normal	0.00249928	-1.11552	down	0.721716	0.197292	normal	0.0360169	-0.909065	normal	0.0945869	0.867356	normal	Molecular Function: protein serine/threonine kinase activity (GO:0004674);; Molecular Function: ATP binding (GO:0005524);; Cellular Component: nucleus (GO:0005634);; Cellular Component: cytoplasm (GO:0005737);; Biological Process: protein phosphorylation (GO:0006468);; Biological Process: intracellular signal transduction (GO:0035556);;	K14498|1.4e-209|ghi:107943303|K14498 serine/threonine-protein kinase SRK2 [EC:2.7.11.1] | (RefSeq) serine/threonine-protein kinase SRK2E-like isoform X1	MAPK signaling pathway - plant (ko04016);; Plant hormone signal transduction (ko04075)	Protein kinase domain	Serine/threonine-protein kinase SRK2E OS=Arabidopsis thaliana OX=3702 GN=SRK2E PE=1 SV=1	PREDICTED: serine/threonine-protein kinase SRK2E-like isoform X1 [Gossypium hirsutum]	biological process: metabolic process (GO:0008152);; biological process: cellular process (GO:0009987);; molecular function: catalytic activity (GO:0003824);; molecular function: binding (GO:0005488);; cellular component: cell (GO:0005623);; cellular component: organelle (GO:0043226);; cellular component: cell part (GO:0044464);; biological process: signaling (GO:0023052);; biological process: si…
Gh_A01G014900	4	TOM40-1	--	--	--	--	--	--	0.000555661	1.91332	up	0.162435	1.14104	normal	0.000364243	-1.3929	down	0.000968148	-1.24126	down	9.07614e-05	1.04889	up	0.00645044	-0.987207	normal		0.231841	1.20567	normal	--	--	--	0.478378	0.435586	normal	0.035916	0.364301	normal	0.0154964	-0.883984	normal	Cellular Component: mitochondrial outer membrane (GO:0005741);; Molecular Function: protein transmembrane transporter activity (GO:0008320);; Biological Process: protein import into mitochondrial matrix (GO:0030150);;	K11518|2.4e-178|gab:108480634|K11518 mitochondrial import receptor subunit TOM40 | (RefSeq) mitochondrial import receptor subunit TOM40-1-like	--	Eukaryotic porin	Mitochondrial import receptor subunit TOM40-1 OS=Arabidopsis thaliana OX=3702 GN=TOM40-1 PE=1 SV=3	PREDICTED: mitochondrial import receptor subunit TOM40-1-like [Gossypium arboreum]	cellular component: cell (GO:0005623);; cellular component: membrane (GO:0016020);; cellular component: organelle (GO:0043226);; cellular component: organelle part (GO:0044422);; cellular component: cell part (GO:0044464);; biological process: localization (GO:0051179);; molecular function: transporter activity (GO:0005215);; biological process: single-organism process (GO:0044699)
Gh_A01G023200	5	SWEET15	1.44796e-06	2.97414	up	1.35034e-07	3.91505	up	4.47013e-14	2.51714	up	2.69406e-43	4.98976	up	1.99135e-08	4.19946	up	1.27326e-08	2.60513	up	0.437591	0.485879	normal	6.35442e-12	2.66361	up	1.22532	0.705498	-0.461296	normal	0.593269	0.767954	normal	0.190664	-1.79762	normal	3.52901e-12	-2.48005	down	4.6699e-21	-2.7613	down	Cellular Component: plasma membrane (GO:0005886);; Biological Process: carbohydrate transport (GO:0008643);; Cellular Component: integral component of membrane (GO:0016021);;	K15382|2.3e-140|ghi:107938460|K15382 solute carrier family 50 (sugar transporter) | (RefSeq) bidirectional sugar transporter SWEET15-like	--	Sugar efflux transporter for intercellular exchange	Bidirectional sugar transporter SWEET15 OS=Arabidopsis thaliana OX=3702 GN=SWEET15 PE=1 SV=1	hypothetical protein ES288_A01G025700v1 [Gossypium darwinii]	cellular component: cell (GO:0005623);; cellular component: membrane (GO:0016020);; cellular component: cell part (GO:0044464);; biological process: single-organism process (GO:0044699);; biological process: localization (GO:0051179);; cellular component: membrane part (GO:0044425)
Gh_A01G027000	6	ufaA1	--	--	--	--	--	--	--	--	--	--	--	--	0.00842093	-1.92193	down	0.0910162	-3.68435	normal	0.00444174	-1.6356	down	2.48162e-10	-8.54299	down		0.601968	1.21777	normal	--	--	--	--	--	--	--	--	--	--	--	--	Molecular Function: oxidoreductase activity (GO:0016491);;	K00574|0.0e+00|gra:105774895|K00574 cyclopropane-fatty-acyl-phospholipid synthase [EC:2.1.1.79] | (RefSeq) uncharacterized LOC105774895	--	Mycolic acid cyclopropane synthetase	3-hydroxy-16-methoxy-2,3-dihydrotabersonine N-methyltransferase OS=Catharanthus roseus OX=4058 GN=NMT PE=1 SV=1	hypothetical protein ES319_A01G026900v1 [Gossypium barbadense]	molecular function: catalytic activity (GO:0003824)
Gh_A01G027800	7	MTERF6	--	--	--	--	--	--	0.0121385	1.34538	up	--	--	--	0.042374	-1.07846	down	0.0121099	-1.15854	down	9.96999e-05	1.09866	up	0.00618259	-1.31995	down		0.798995	0.373627	normal	--	--	--	--	--	--	0.653615	0.150294	normal	--	--	--	Molecular Function: double-stranded DNA binding (GO:0003690);; Biological Process: regulation of transcription, DNA-templated (GO:0006355);;	K15032|6.7e-154|gra:105775014|K15032 mTERF domain-containing protein, mitochondrial | (RefSeq) uncharacterized LOC105775014	--	mTERF	--	hypothetical protein ES332_A01G036200v1 [Gossypium tomentosum]	molecular function: binding (GO:0005488);; biological process: biological regulation (GO:0065007)
Gh_A01G032200	8	At5g18500	0.192282	-0.494629	normal	0.254436	-0.36356	normal	1.81582e-70	4.26536	up	1.2209e-99	5.30065	up	0.000334617	-1.38268	down	0.336489	-0.361774	normal	7.12368e-17	2.47947	up	2.03325e-38	3.28883	up		0.967267	-0.0534104	normal	0.0374545	-0.933711	normal	0.909319	-0.0696794	normal	4.36757e-14	-1.82719	down	2.58985e-20	-2.03517	down	Molecular Function: protein serine/threonine kinase activity (GO:0004674);; Molecular Function: ATP binding (GO:0005524);; Cellular Component: integral component of membrane (GO:0016021);;	K01180|1.1e-76|cmax:111487562|K01180 endo-1,3(4)-beta-glucanase [EC:3.2.1.6] | (RefSeq) uncharacterized protein LOC111487562	--	Protein kinase domain	Probable receptor-like protein kinase At5g18500 OS=Arabidopsis thaliana OX=3702 GN=At5g18500 PE=2 SV=1	hypothetical protein ES288_A01G033800v1 [Gossypium darwinii]	biological process: metabolic process (GO:0008152);; biological process: cellular process (GO:0009987);; molecular function: catalytic activity (GO:0003824);; molecular function: binding (GO:0005488);; cellular component: membrane (GO:0016020);; cellular component: membrane part (GO:0044425)
Gh_A01G034900	9	Gh_A01G034900	--	--	--	--	--	--	--	--	--	0.0350872	-1.60454	down	0.0297164	-1.04341	down	0.0178964	-1.0909	down	0.00131196	-1.39841	down	0.0180483	-1.11398	down		0.630967	0.477263	normal	--	--	--	--	--	--	--	--	--	--	--	--	Biological Process: deadenylation-dependent decapping of nuclear-transcribed mRNA (GO:0000290);; Cellular Component: integral component of membrane (GO:0016021);;	K12617|1.6e-24|ghi:107932667|K12617 DNA topoisomerase 2-associated protein PAT1 | (RefSeq) protein PAT1 homolog 1-like	RNA degradation (ko03018)	--	Protein PAT1 homolog OS=Arabidopsis thaliana OX=3702 GN=PAT1 PE=1 SV=1	hypothetical protein E1A91_A01G036500v1 [Gossypium mustelinum]	biological process: metabolic process (GO:0008152);; biological process: cellular process (GO:0009987);; biological process: biological regulation (GO:0065007);; cellular component: membrane (GO:0016020);; cellular component: membrane part (GO:0044425)
Gh_A01G036300	10	murD	--	--	--	--	--	--	0.570308	0.584011	normal	--	--	--	0.00865806	-1.31806	down	0.00329125	-1.6055	down	0.688449	0.193239	normal	0.00161446	-1.70627	down		0.397241	1.4218	normal	--	--	--	--	--	--	0.00198121	1.05397	up	--	--	--	Molecular Function: ATP binding (GO:0005524);; Cellular Component: cytoplasm (GO:0005737);; Biological Process: regulation of cell shape (GO:0008360);; Molecular Function: UDP-N-acetylmuramoylalanine-D-glutamate ligase activity (GO:0008764);; Biological Process: biosynthetic process (GO:0009058);; Biological Process: cell division (GO:0051301);;	--	--	Mur ligase middle domain	--	PREDICTED: UDP-N-acetylmuramoylalanine--D-glutamate ligase-like isoform X1 [Gossypium hirsutum]	molecular function: binding (GO:0005488);; cellular component: cell (GO:0005623);; cellular component: cell part (GO:0044464);; biological process: biological regulation (GO:0065007);; molecular function: catalytic activity (GO:0003824);; biological process: metabolic process (GO:0008152);; biological process: cellular process (GO:0009987);; biological process: single-organism process (GO:0044699)
Gh_A01G039300	11	ycf2-A	0.674211	-0.322456	normal	0.141276	-0.872345	normal	1.13881e-09	-7.0348	down	8.84322e-08	-8.38969	down	0.0175673	-1.20165	down	0.00140376	-1.70869	down	7.74706e-23	-4.4591	down	1.48007e-17	-5.05701	down		0.0174786	0.960192	normal	0.946889	0.085212	normal	0.939596	0.112185	normal	--	--	--	--	--	--	--	--	--	--	--	hypothetical protein ES319_A01G039800v1 [Gossypium barbadense]	--
Gh_A01G041600	12	GLC1	--	--	--	--	--	--	--	--	--	0.00625875	-2.89593	down	8.04243e-05	-2.37182	down	3.58301e-12	-7.3518	down	0.0118413	-4.07334	down	0.00273499	-5.69724	down		0.926692	0.267045	normal	--	--	--	--	--	--	--	--	--	--	--	--	--	K19891|1.2e-13|smo:SELMODRAFT_442025|K19891 glucan endo-1,3-beta-glucosidase 1/2/3 [EC:3.2.1.39] | (RefSeq) hypothetical protein	Starch and sucrose metabolism (ko00500)	X8 domain	Glucan endo-1,3-beta-glucosidase OS=Triticum aestivum OX=4565 GN=GLC1 PE=2 SV=1	PREDICTED: glucan endo-1,3-beta-glucosidase-like [Gossypium hirsutum]	--
Gh_A01G042400	13	ESAG8C	--	--	--	--	--	--	--	--	--	--	--	--	0.013221	0.932063	normal	0.060039	0.741074	normal	0.0318238	0.726268	normal	--	--	--		--	--	--	3.45291e-11	8.85249	up	2.18019e-10	8.65198	up	5.64803e-12	8.89627	up	--	--	--	Cellular Component: cellular_component (GO:0005575);; Cellular Component: cell (GO:0005623);; Cellular Component: plasma membrane (GO:0005886);; Biological Process: cell communication (GO:0007154);; Biological Process: signal transduction (GO:0007165);; Biological Process: biological_process (GO:0008150);; Biological Process: cellular process (GO:0009987);; Cellular Component: membrane (GO:001602…	K13459|3.3e-82|gab:108483480|K13459 disease resistance protein RPS2 | (RefSeq) probable disease resistance protein At5g43730	Plant-pathogen interaction (ko04626)	--	--	PREDICTED: uncharacterized protein LOC107933905 [Gossypium hirsutum]	cellular component: cell (GO:0005623);; cellular component: membrane (GO:0016020);; cellular component: cell part (GO:0044464);; biological process: cellular process (GO:0009987);; biological process: biological regulation (GO:0065007);; biological process: signaling (GO:0023052);; biological process: response to stimulus (GO:0050896)
Gh_A01G044900	14	RPS2	0.0318312	0.902182	normal	0.384307	0.412776	normal	0.00424233	-1.56352	down	0.0302219	1.14215	up	0.999	-0.00053513	normal	0.000657687	1.09939	up	0.000167237	-1.53222	down	4.59377e-16	2.10148	up		0.309346	-0.770401	normal	1.34539e-10	-1.65902	down	0.842508	-0.101063	normal	--	--	--	0.439728	0.212033	normal	Cellular Component: cellular_component (GO:0005575);; Cellular Component: cell (GO:0005623);; Cellular Component: plasma membrane (GO:0005886);; Biological Process: response to stress (GO:0006950);; Biological Process: defense response (GO:0006952);; Biological Process: cell communication (GO:0007154);; Biological Process: signal transduction (GO:0007165);; Biological Process: biological_process …	K13459|3.6e-12|ghi:107944739|K13459 disease resistance protein RPS2 | (RefSeq) disease resistance protein At4g27190-like	Plant-pathogen interaction (ko04626)	Leucine Rich repeats (2 copies)	--	hypothetical protein GOBAR_AA25153 [Gossypium barbadense]	cellular component: cell (GO:0005623);; cellular component: membrane (GO:0016020);; cellular component: cell part (GO:0044464);; biological process: response to stimulus (GO:0050896);; biological process: cellular process (GO:0009987);; biological process: biological regulation (GO:0065007);; biological process: signaling (GO:0023052)
Gh_A01G049500	15	XA21	--	--	--	--	--	--	--	--	--	--	--	--	2.84591e-10	1.92264	up	--	--	--	--	--	--	--	--	--		--	--	--	4.33697e-13	9.45801	up	--	--	--	--	--	--	--	--	--	Molecular Function: protein serine/threonine kinase activity (GO:0004674);; Molecular Function: ATP binding (GO:0005524);; Cellular Component: plasma membrane (GO:0005886);; Cellular Component: integral component of membrane (GO:0016021);;	K13420|4.1e-281|gab:108481249|K13420 LRR receptor-like serine/threonine-protein kinase FLS2 [EC:2.7.11.1] | (RefSeq) putative receptor-like protein kinase At3g47110	MAPK signaling pathway - plant (ko04016);; Plant-pathogen interaction (ko04626)	Leucine rich repeat	Receptor kinase-like protein Xa21 OS=Oryza sativa subsp. indica OX=39946 GN=XA21 PE=1 SV=1	PREDICTED: putative receptor-like protein kinase At3g47110 [Gossypium hirsutum]	biological process: metabolic process (GO:0008152);; biological process: cellular process (GO:0009987);; molecular function: catalytic activity (GO:0003824);; molecular function: binding (GO:0005488);; cellular component: cell (GO:0005623);; cellular component: membrane (GO:0016020);; cellular component: cell part (GO:0044464);; cellular component: membrane part (GO:0044425)
Gh_A01G054000	16	At1g78830	0.0533606	-1.29181	normal	0.252986	-0.865364	normal	3.59435e-18	2.72342	up	3.1486e-30	3.98957	up	1.62521e-06	-1.70827	down	0.0305635	-0.873784	normal	0.0784446	0.519664	normal	0.20159	0.428726	normal		0.098096	0.79722	normal	--	--	--	0.431197	0.773198	normal	1.50063e-08	-1.39737	down	2.40603e-18	-2.73735	down	Cellular Component: cellular_component (GO:0005575);; Cellular Component: extracellular region (GO:0005576);; Cellular Component: cell wall (GO:0005618);; Cellular Component: intracellular (GO:0005622);; Cellular Component: cell (GO:0005623);; Cellular Component: cytoplasm (GO:0005737);; Cellular Component: Golgi apparatus (GO:0005794);; Cellular Component: plasma membrane (GO:0005886);; Cellular…	--	--	D-mannose binding lectin	EP1-like glycoprotein 2 OS=Arabidopsis thaliana OX=3702 GN=At1g78830 PE=1 SV=1	hypothetical protein ES288_A01G059700v1 [Gossypium darwinii]	cellular component: extracellular region (GO:0005576);; cellular component: cell (GO:0005623);; cellular component: cell part (GO:0044464);; cellular component: organelle (GO:0043226);; cellular component: membrane (GO:0016020);; cellular component: cell junction (GO:0030054);; biological process: response to stimulus (GO:0050896);; cellular component: symplast (GO:0055044)
Gh_A01G056100	17	Gh_A01G056100	0.661347	-0.143517	normal	0.839488	-0.0741802	normal	1.12214e-09	1.48467	up	1.27873e-05	1.40267	up	0.0479671	0.312697	normal	0.00436126	-0.706803	normal	2.00067e-07	0.777946	normal	1.30945e-14	1.29952	up		0.00102741	0.923374	normal	1.51263e-16	1.38743	up	0.546796	0.272667	normal	0.168964	0.22159	normal	9.88531e-05	0.842772	normal	--	K01431|5.5e-08|zju:107404092|K01431 beta-ureidopropionase [EC:3.5.1.6] | (RefSeq) beta-ureidopropionase-like	Pyrimidine metabolism (ko00240);; beta-Alanine metabolism (ko00410);; Pantothenate and CoA biosynthesis (ko00770)	--	--	PREDICTED: uncharacterized protein LOC107917760 [Gossypium hirsutum]	--
Gh_A01G060700	18	SPL4	--	--	--	--	--	--	--	--	--	--	--	--	0.00456161	-1.52277	down	0.00142112	-3.12464	down	4.73366e-06	-1.87453	down	0.00104166	-2.6413	down		0.363679	0.656898	normal	--	--	--	--	--	--	--	--	--	--	--	--	Molecular Function: DNA binding (GO:0003677);; Cellular Component: nucleus (GO:0005634);; Cellular Component: host cell nucleus (GO:0042025);; Molecular Function: metal ion binding (GO:0046872);;	K20641|2.9e-14|cvr:CHLNCDRAFT_59250|K20641 Rho GTPase-activating protein 20 | (RefSeq) hypothetical protein	--	SBP domain	Squamosa promoter-binding-like protein 5 OS=Arabidopsis thaliana OX=3702 GN=SPL5 PE=2 SV=1	PREDICTED: squamosa promoter-binding protein 1-like [Gossypium hirsutum]	molecular function: binding (GO:0005488);; cellular component: cell (GO:0005623);; cellular component: organelle (GO:0043226);; cellular component: cell part (GO:0044464);; cellular component: other organism (GO:0044215);; cellular component: other organism part (GO:0044217)
Gh_A01G070400	19	PBP1	--	--	--	--	--	--	--	--	--	--	--	--	0.117904	0.834116	normal	--	--	--	--	--	--	--	--	--		--	--	--	0.000119006	1.89773	up	--	--	--	--	--	--	--	--	--	Molecular Function: calcium ion binding (GO:0005509);;	K24345|5.8e-61|gab:108482546|K24345 calcium-binding protein KIC and related proteins | (RefSeq) calcium-binding protein PBP1-like	--	EF-hand domain pair	Calcium-binding protein KRP1 OS=Arabidopsis thaliana OX=3702 GN=KRP1 PE=2 SV=1	PREDICTED: calcium-binding protein PBP1-like [Gossypium arboreum]	molecular function: binding (GO:0005488)
Gh_A01G070600	20	SD11	0.219545	-0.369586	normal	1.2417e-05	0.872645	normal	0.0240742	0.682013	normal	1.77401e-13	-2.80986	down	0.162893	0.214012	normal	1.48583e-09	1.39311	up	3.90973e-13	1.25997	up	1.74516e-14	-1.86029	down		0.00416202	0.647372	normal	6.47017e-11	1.23518	up	9.91821e-06	1.14892	up	1.27039e-07	1.23698	up	0.000756291	1.62027	up	Molecular Function: protein serine/threonine kinase activity (GO:0004674);; Molecular Function: ATP binding (GO:0005524);; Cellular Component: integral component of membrane (GO:0016021);; Biological Process: recognition of pollen (GO:0048544);;	K24104|7.3e-81|thj:104799061|K24104 GPN-loop GTPase | (RefSeq) LOW QUALITY PROTEIN: uncharacterized protein LOC104799061	--	Protein tyrosine and serine/threonine kinase	G-type lectin S-receptor-like serine/threonine-protein kinase SD1-1 OS=Arabidopsis thaliana OX=3702 GN=SD11 PE=1 SV=1	hypothetical protein E1A91_A01G073000v1 [Gossypium mustelinum]	biological process: metabolic process (GO:0008152);; biological process: cellular process (GO:0009987);; molecular function: catalytic activity (GO:0003824);; molecular function: binding (GO:0005488);; cellular component: membrane (GO:0016020);; cellular component: membrane part (GO:0044425);; biological process: reproduction (GO:0000003);; biological process: reproductive process (GO:0022414);; …
Gh_A01G071100	21	PBP1	0.980749	-0.0174605	normal	0.541875	0.302129	normal	0.790489	-0.135975	normal	0.138522	-0.858029	normal	0.978077	0.00928782	normal	0.0109363	0.543345	normal	0.000135057	-1.00243	down	0.100832	-0.400034	normal		0.0565395	1.0403	normal	0.00463858	1.07604	up	4.8634e-12	1.26017	up	0.603308	0.17464	normal	6.30006e-08	1.51814	up	Molecular Function: calcium ion binding (GO:0005509);;	K24345|3.6e-64|gab:108482779|K24345 calcium-binding protein KIC and related proteins | (RefSeq) calcium-binding protein PBP1-like	--	EF-hand domain pair	Calcium-binding protein KRP1 OS=Arabidopsis thaliana OX=3702 GN=KRP1 PE=2 SV=1	PREDICTED: calcium-binding protein PBP1-like [Gossypium hirsutum]	molecular function: binding (GO:0005488)
Gh_A01G071600	22	SLSG	--	--	--	0.000834136	1.41125	up	2.43014e-06	1.85663	up	--	--	--	0.00113645	1.59325	up	1.54873e-05	2.11777	up	1.9255e-05	1.94246	up	0.0158496	1.27555	up		--	--	--	0.479619	0.381671	normal	0.111466	0.649904	normal	0.872044	0.0528885	normal	0.059733	0.970235	normal	Biological Process: recognition of pollen (GO:0048544);;	K03327|1.1e-15|cic:CICLE_v10018703mg|K03327 multidrug resistance protein, MATE family | (RefSeq) hypothetical protein	--	D-mannose binding lectin	G-type lectin S-receptor-like serine/threonine-protein kinase At4g27290 OS=Arabidopsis thaliana OX=3702 GN=At4g27290 PE=3 SV=4	hypothetical protein E1A91_A01G074100v1 [Gossypium mustelinum]	biological process: reproduction (GO:0000003);; biological process: cellular process (GO:0009987);; biological process: reproductive process (GO:0022414);; biological process: single-organism process (GO:0044699)
Gh_A01G072200	23	GH3.6	0.22491	-0.86966	normal	0.487874	-0.595982	normal	0.000352973	-2.75074	down	6.65607e-10	-4.21409	down	0.00384861	-1.46132	down	3.15095e-06	-2.82876	down	0.000112136	-1.82335	down	7.06348e-06	-3.16519	down		0.913217	0.195035	normal	0.685649	-0.385261	normal	--	--	--	0.121531	1.12156	normal	--	--	--	Biological Process: cell morphogenesis (GO:0000902);; Molecular Function: molecular_function (GO:0003674);; Molecular Function: catalytic activity (GO:0003824);; Cellular Component: cellular_component (GO:0005575);; Cellular Component: intracellular (GO:0005622);; Cellular Component: cell (GO:0005623);; Cellular Component: cytoplasm (GO:0005737);; Biological Process: cellular aromatic compound me…	K14487|0.0e+00|ghi:107916581|K14487 auxin responsive GH3 gene family | (RefSeq) indole-3-acetic acid-amido synthetase GH3.6	Plant hormone signal transduction (ko04075)	GH3 auxin-responsive promoter	Indole-3-acetic acid-amido synthetase GH3.6 OS=Arabidopsis thaliana OX=3702 GN=GH3.6 PE=1 SV=1	hypothetical protein ES319_A01G072700v1 [Gossypium barbadense]	biological process: cellular process (GO:0009987);; biological process: developmental process (GO:0032502);; biological process: single-organism process (GO:0044699);; biological process: cellular component organization or biogenesis (GO:0071840);; molecular function: catalytic activity (GO:0003824);; cellular component: cell (GO:0005623);; cellular component: cell part (GO:0044464);; biological …
Gh_A01G072400	24	GH3.6	--	--	--	0.907523	0.151725	normal	0.0090274	1.97292	up	0.0190438	2.33307	up	2.76146e-07	-2.89798	down	0.527139	-1.40645	normal	0.208672	0.693465	normal	0.0158183	1.2475	up		0.937748	0.254875	normal	--	--	--	0.713567	-1.31132	normal	0.000381471	-1.00126	down	0.00866346	-0.791727	normal	Biological Process: cell morphogenesis (GO:0000902);; Molecular Function: molecular_function (GO:0003674);; Molecular Function: catalytic activity (GO:0003824);; Cellular Component: cellular_component (GO:0005575);; Cellular Component: intracellular (GO:0005622);; Cellular Component: cell (GO:0005623);; Cellular Component: cytoplasm (GO:0005737);; Biological Process: cellular aromatic compound me…	K14487|0.0e+00|ghi:107918077|K14487 auxin responsive GH3 gene family | (RefSeq) indole-3-acetic acid-amido synthetase GH3.6-like	Plant hormone signal transduction (ko04075)	GH3 auxin-responsive promoter	Indole-3-acetic acid-amido synthetase GH3.6 OS=Arabidopsis thaliana OX=3702 GN=GH3.6 PE=1 SV=1	hypothetical protein ES319_A01G072800v1 [Gossypium barbadense]	biological process: cellular process (GO:0009987);; biological process: developmental process (GO:0032502);; biological process: single-organism process (GO:0044699);; biological process: cellular component organization or biogenesis (GO:0071840);; molecular function: catalytic activity (GO:0003824);; cellular component: cell (GO:0005623);; cellular component: cell part (GO:0044464);; biological …
Gh_A01G076100	25	NDR1	--	--	--	0.0500973	0.925952	normal	0.0729449	0.896718	normal	--	--	--	0.370469	0.363826	normal	0.0310779	0.768535	normal	1.03803e-05	1.23484	up	0.770251	-0.120297	normal		0.463894	0.659479	normal	0.0110471	1.01963	up	0.234779	0.48573	normal	0.00018448	1.0003	up	0.0163994	1.38694	up	Cellular Component: plasmodesma (GO:0009506);; Cellular Component: integral component of membrane (GO:0016021);; Cellular Component: anchored component of plasma membrane (GO:0046658);;	--	--	--	Protein NDR1 OS=Arabidopsis thaliana OX=3702 GN=NDR1 PE=1 SV=1	PREDICTED: protein NDR1-like [Gossypium hirsutum]	cellular component: cell junction (GO:0030054);; cellular component: membrane (GO:0016020);; cellular component: membrane part (GO:0044425);; cellular component: cell (GO:0005623);; cellular component: cell part (GO:0044464)
Gh_A01G083200	26	Gh_A01G083200	--	--	--	--	--	--	--	--	--	1.01164e-05	-4.54822	down	4.73878e-08	-1.73994	down	1.04629e-16	-3.65064	down	5.99275e-24	-4.03151	down	2.34195e-11	-2.32041	down		0.0424218	1.11264	up	--	--	--	--	--	--	--	--	--	--	--	--	Cellular Component: plant-type vacuole (GO:0000325);; Biological Process: response to acid chemical (GO:0001101);; Biological Process: regulation of cell growth (GO:0001558);; Molecular Function: molecular_function (GO:0003674);; Molecular Function: structural molecule activity (GO:0005198);; Molecular Function: structural constituent of cell wall (GO:0005199);; Cellular Component: cellular_compo…	--	--	--	--	PREDICTED: glycine-rich cell wall structural protein-like [Gossypium hirsutum]	cellular component: cell (GO:0005623);; cellular component: organelle (GO:0043226);; cellular component: cell part (GO:0044464);; biological process: response to stimulus (GO:0050896);; biological process: biological regulation (GO:0065007);; molecular function: structural molecule activity (GO:0005198)
Gh_A01G090400	27	CYP71D10	--	--	--	0.157674	-1.44363	normal	--	--	--	0.000217783	-5.33155	down	0.00200341	-1.47582	down	1.62488e-07	-2.97793	down	3.53512e-06	-3.80597	down	3.0729e-08	-2.96277	down		0.98543	-0.0601756	normal	--	--	--	--	--	--	--	--	--	--	--	--	Molecular Function: iron ion binding (GO:0005506);; Cellular Component: membrane (GO:0016020);; Cellular Component: integral component of membrane (GO:0016021);; Molecular Function: oxidoreductase activity, acting on paired donors, with incorporation or reduction of molecular oxygen, NAD(P)H as one donor, and incorporation of one atom of oxygen (GO:0016709);; Molecular Function: heme binding (GO:…	K23806|1.0e-171|vvi:100263449|K23806 alpha-guaiene 2-oxidase | (RefSeq) CYP71BE5; premnaspirodiene oxygenase-like	--	Cytochrome P450	Premnaspirodiene oxygenase OS=Hyoscyamus muticus OX=35626 GN=CYP71D55 PE=1 SV=1	PREDICTED: cytochrome P450 71D9-like [Gossypium hirsutum]	molecular function: binding (GO:0005488);; cellular component: membrane (GO:0016020);; cellular component: membrane part (GO:0044425);; biological process: metabolic process (GO:0008152);; biological process: single-organism process (GO:0044699);; molecular function: catalytic activity (GO:0003824)
Gh_A01G093100	28	SEC3	--	--	--	--	--	--	0.0117083	-3.43806	down	0.0178218	-4.29454	down	3.0996e-13	-4.16783	down	5.62024e-06	-6.78674	down	4.04075e-08	-3.35669	down	1.31105e-09	-4.18821	down		0.966773	0.224609	normal	--	--	--	--	--	--	--	--	--	--	--	--	--	--	--	Inner centromere protein, ARK binding region	--	PREDICTED: uncharacterized protein LOC107952991 isoform X2 [Gossypium hirsutum]	--
Gh_A01G094600	29	NOP2	0.518611	-0.411951	normal	0.664148	0.247101	normal	9.4919e-08	2.08887	up	0.320854	0.602791	normal	0.000341734	-1.02897	down	0.0560142	-0.51514	normal	1.68254e-18	1.51012	up	0.0391983	-0.590205	normal		0.360397	0.722163	normal	0.864704	0.105059	normal	0.901044	-0.0601618	normal	0.323349	0.164892	normal	0.213662	-0.434452	normal	Biological Process: maturation of LSU-rRNA (GO:0000470);; Biological Process: RNA methylation (GO:0001510);; Molecular Function: RNA binding (GO:0003723);; Cellular Component: nucleolus (GO:0005730);; Molecular Function: rRNA (cytosine-C5-)-methyltransferase activity (GO:0009383);; Biological Process: rRNA base methylation (GO:0070475);;	K14835|2.6e-291|ghi:107888173|K14835 25S rRNA (cytosine2870-C5)-methyltransferase [EC:2.1.1.310] | (RefSeq) 25S rRNA (cytosine-C(5))-methyltransferase nop2-like	--	16S rRNA methyltransferase RsmB/F	26S rRNA (cytosine-C(5))-methyltransferase NOP2B OS=Arabidopsis thaliana OX=3702 GN=NOP2B PE=1 SV=1	PREDICTED: 25S rRNA (cytosine-C(5))-methyltransferase nop2-like [Gossypium hirsutum]	biological process: metabolic process (GO:0008152);; biological process: cellular process (GO:0009987);; biological process: cellular component organization or biogenesis (GO:0071840);; molecular function: binding (GO:0005488);; cellular component: cell (GO:0005623);; cellular component: organelle (GO:0043226);; cellular component: organelle part (GO:0044422);; cellular component: cell part (GO:0…
Gh_A01G096100	30	KIN14F	0.13709	-0.512996	normal	1.76707e-05	-1.25285	down	0.0820896	-1.76761	normal	5.80094e-09	-8.98456	down	1.7927e-05	-1.83775	down	0.373323	-0.353609	normal	3.46658e-05	-1.97477	down	5.9152e-09	-3.40345	down		0.530571	-0.386995	normal	0.000100964	-1.70623	down	0.325948	0.491766	normal	0.595916	-0.589368	normal	--	--	--	Molecular Function: nucleic acid binding (GO:0003676);; Molecular Function: microtubule motor activity (GO:0003777);; Molecular Function: ATP binding (GO:0005524);; Biological Process: microtubule-based movement (GO:0007018);; Molecular Function: microtubule binding (GO:0008017);; Molecular Function: zinc ion binding (GO:0008270);;	K10406|0.0e+00|gab:108483267|K10406 kinesin family member C2/C3 | (RefSeq) kinesin KP1-like	--	Kinesin motor domain	Kinesin-like protein KIN-14F OS=Arabidopsis thaliana OX=3702 GN=KIN14F PE=1 SV=2	hypothetical protein E1A91_A01G098200v1 [Gossypium mustelinum]	molecular function: binding (GO:0005488);; molecular function: catalytic activity (GO:0003824);; biological process: cellular process (GO:0009987);; biological process: single-organism process (GO:0044699)
Gh_A01G096500	31	At1g55760	0.0218307	0.912865	normal	2.167e-05	1.50589	up	0.00790625	1.02555	up	9.1547e-05	1.82032	up	2.87084e-09	1.28632	up	6.34046e-29	2.13897	up	2.31819e-21	1.79091	up	1.15722e-11	1.43676	up		0.902837	-0.153022	normal	0.417692	0.230596	normal	0.0180998	0.46	normal	0.000694365	0.614146	normal	0.0206619	-0.514152	normal	Cellular Component: ubiquitin ligase complex (GO:0000151);; Molecular Function: molecular_function (GO:0003674);; Molecular Function: binding (GO:0005488);; Molecular Function: protein binding (GO:0005515);; Cellular Component: cellular_component (GO:0005575);; Cellular Component: intracellular (GO:0005622);; Cellular Component: cell (GO:0005623);; Cellular Component: cytoplasm (GO:0005737);; Bio…	K10523|1.3e-190|ghi:107918085|K10523 speckle-type POZ protein | (RefSeq) BTB/POZ domain-containing protein At1g55760-like	--	BTB/POZ domain	BTB/POZ domain-containing protein At1g55760 OS=Arabidopsis thaliana OX=3702 GN=At1g55760 PE=2 SV=1	PREDICTED: BTB/POZ domain-containing protein At1g55760-like [Gossypium hirsutum]	cellular component: cell (GO:0005623);; cellular component: macromolecular complex (GO:0032991);; cellular component: cell part (GO:0044464);; molecular function: binding (GO:0005488);; biological process: metabolic process (GO:0008152);; biological process: cellular process (GO:0009987);; biological process: biological regulation (GO:0065007)
Gh_A01G108800	32	CYCB2-4	--	--	--	0.107973	-1.98635	normal	--	--	--	2.86484e-06	-9.14112	down	2.46679e-06	-2.22719	down	5.23334e-12	-5.10721	down	0.0162339	-3.65769	down	3.8221e-12	-5.26348	down		0.993711	-0.0262631	normal	--	--	--	--	--	--	--	--	--	--	--	--	Cellular Component: host cell nucleus (GO:0042025);;	K21777|1.5e-220|gra:105783719|K21777 G2/mitotic-specific cyclin-B, other | (RefSeq) G2/mitotic-specific cyclin-2-like	--	Cyclin, N-terminal domain	Cyclin-B2-4 OS=Arabidopsis thaliana OX=3702 GN=CYCB2-4 PE=2 SV=2	hypothetical protein ES332_A01G124100v1 [Gossypium tomentosum]	cellular component: other organism (GO:0044215);; cellular component: other organism part (GO:0044217)
Gh_A01G110300	33	Gh_A01G110300	0.00143029	-0.925934	normal	2.18756e-14	-2.17532	down	1.03021e-77	-7.05895	down	5.42843e-60	-7.95099	down	9.43657e-19	-1.18983	down	1.65951e-48	-2.30155	down	2.75987e-208	-8.27138	down	7.20473e-18	-4.21666	down		0.89547	-0.119795	normal	0.0137472	-0.374531	normal	0.254909	-0.266091	normal	--	--	--	1.51219e-08	3.63437	up	--	--	--	--	--	PREDICTED: uncharacterized protein LOC107916935 isoform X1 [Gossypium hirsutum]	--
Gh_A01G110700	34	Gh_A01G110700	--	--	--	--	--	--	--	--	--	0.000334407	-5.11228	down	0.0203201	-1.81962	down	--	--	--	--	--	--	--	--	--		0.877455	-0.389695	normal	--	--	--	--	--	--	--	--	--	--	--	--	--	--	--	Protein of unknown function (DUF632)	--	chromosome segregation suda [Gossypium arboreum]	--
Gh_A01G113000	35	Mfsd14a	0.0545017	-0.886215	normal	0.984435	0.00753242	normal	0.00130887	-1.21888	down	5.89676e-05	-2.96682	down	0.974294	0.0125759	normal	0.0350294	-0.582607	normal	5.43468e-05	-1.10231	down	2.60873e-06	-1.45969	down		0.766841	0.19851	normal	0.00808627	1.10075	up	0.250555	-0.412346	normal	0.437179	0.330409	normal	0.0335326	1.72674	up	Cellular Component: integral component of membrane (GO:0016021);; Molecular Function: transmembrane transporter activity (GO:0022857);;	--	--	Major Facilitator Superfamily	--	hypothetical protein ES332_A01G128200v1 [Gossypium tomentosum]	cellular component: membrane (GO:0016020);; cellular component: membrane part (GO:0044425);; biological process: localization (GO:0051179);; molecular function: transporter activity (GO:0005215)
Gh_A01G116800	36	ARF5	--	--	--	0.951043	-0.172269	normal	0.0594696	3.74277	normal	0.131638	3.86169	normal	0.000259987	-1.58981	down	0.0679514	-0.815401	normal	7.70428e-14	2.05427	up	0.00155132	1.02187	up		0.923629	0.646106	normal	--	--	--	0.985771	-0.0245559	normal	4.17948e-10	-0.996037	normal	1.75544e-38	-2.14549	down	Molecular Function: DNA binding (GO:0003677);; Cellular Component: nucleus (GO:0005634);; Biological Process: regulation of transcription, DNA-templated (GO:0006355);; Biological Process: auxin-activated signaling pathway (GO:0009734);;	K14486|0.0e+00|ghi:107918011|K14486 auxin response factor | (RefSeq) auxin response factor 5-like isoform X1	Plant hormone signal transduction (ko04075)	Auxin response factor	Auxin response factor 5 OS=Arabidopsis thaliana OX=3702 GN=ARF5 PE=1 SV=3	PREDICTED: auxin response factor 5-like isoform X1 [Gossypium hirsutum]	molecular function: binding (GO:0005488);; cellular component: cell (GO:0005623);; cellular component: organelle (GO:0043226);; cellular component: cell part (GO:0044464);; biological process: biological regulation (GO:0065007);; biological process: cellular process (GO:0009987);; biological process: signaling (GO:0023052);; biological process: single-organism process (GO:0044699);; biological pr…
Gh_A01G119800	37	RL6	--	--	--	--	--	--	--	--	--	--	--	--	7.69389e-10	-3.64638	down	0.000200579	-1.69119	down	8.13953e-13	-9.0847	down	1.00869e-11	-8.70805	down		0.0359971	1.40943	up	--	--	--	--	--	--	--	--	--	--	--	--	Molecular Function: DNA binding (GO:0003677);;	K15397|9.1e-17|cpep:111776416|K15397 3-ketoacyl-CoA synthase [EC:2.3.1.199] | (RefSeq) 3-ketoacyl-CoA synthase 17-like	Fatty acid elongation (ko00062);; Plant-pathogen interaction (ko04626)	--	Protein RADIALIS-like 5 OS=Arabidopsis thaliana OX=3702 GN=RL5 PE=3 SV=1	PREDICTED: protein RADIALIS-like 5 [Gossypium hirsutum]	molecular function: binding (GO:0005488)
Gh_A01G123300	38	MIZ1	0.0230687	-0.738283	normal	0.0118225	-0.419141	normal	4.13197e-69	-3.89918	down	1.26688e-77	-6.4486	down	5.2348e-11	-1.06118	down	7.58823e-05	-1.26253	down	1.71151e-30	-2.58457	down	2.86877e-13	-2.29308	down		0.612758	0.199972	normal	0.798036	-0.116373	normal	0.121872	-0.659539	normal	8.12965e-08	1.5231	up	7.6438e-17	4.38154	up	Biological Process: hydrotropism (GO:0010274);;	--	--	Protein of unknown function, DUF617	Protein MIZU-KUSSEI 1 OS=Arabidopsis thaliana OX=3702 GN=MIZ1 PE=1 SV=1	hypothetical protein ES319_A01G121600v1 [Gossypium barbadense]	biological process: response to stimulus (GO:0050896)
Gh_A01G124200	39	At5g42700	0.0635288	-1.35528	normal	0.393232	-0.700999	normal	0.00515604	-1.8799	down	0.0075152	-3.77621	down	0.00203874	-1.20741	down	0.239009	-0.483133	normal	0.013349	-0.884738	normal	0.000286736	-1.353	down		0.948645	-0.145806	normal	--	--	--	0.961999	0.0494366	normal	0.0470409	0.870871	normal	--	--	--	Molecular Function: DNA binding (GO:0003677);; Cellular Component: nucleus (GO:0005634);;	K10405|3.2e-07|psom:113325062|K10405 kinesin family member C1 | (RefSeq) kinesin-like protein KIN-14N	--	B3 DNA binding domain	B3 domain-containing protein At3g19184 OS=Arabidopsis thaliana OX=3702 GN=At3g19184 PE=2 SV=1	PREDICTED: B3 domain-containing protein At5g42700-like isoform X1 [Gossypium hirsutum]	molecular function: binding (GO:0005488);; cellular component: cell (GO:0005623);; cellular component: organelle (GO:0043226);; cellular component: cell part (GO:0044464)
Gh_A01G124300	40	BKI1	--	--	--	0.00670856	1.47458	up	1.21324e-05	2.08407	up	--	--	--	0.000832588	1.42108	up	1.0441e-06	1.92483	up	5.62814e-10	1.95409	up	--	--	--		--	--	--	0.159636	0.652085	normal	0.0791825	0.804692	normal	0.39483	0.250302	normal	--	--	--	Cellular Component: plasma membrane (GO:0005886);; Molecular Function: kinase activity (GO:0016301);; Molecular Function: kinase inhibitor activity (GO:0019210);;	K14499|2.1e-144|ghi:107917087|K14499 BRI1 kinase inhibitor 1 | (RefSeq) BRI1 kinase inhibitor 1-like	Plant hormone signal transduction (ko04075)	--	BRI1 kinase inhibitor 1 OS=Arabidopsis thaliana OX=3702 GN=BKI1 PE=1 SV=1	PREDICTED: BRI1 kinase inhibitor 1-like [Gossypium hirsutum]	cellular component: cell (GO:0005623);; cellular component: membrane (GO:0016020);; cellular component: cell part (GO:0044464);; molecular function: catalytic activity (GO:0003824);; biological process: biological regulation (GO:0065007);; molecular function: molecular function regulator (GO:0098772)
Gh_A01G126000	41	At3g47570	--	--	--	--	--	--	--	--	--	--	--	--	0.00297082	1.88701	up	--	--	--	--	--	--	--	--	--		--	--	--	0.241936	0.832434	normal	--	--	--	--	--	--	--	--	--	Molecular Function: protein serine/threonine kinase activity (GO:0004674);; Molecular Function: ATP binding (GO:0005524);; Cellular Component: plasma membrane (GO:0005886);; Cellular Component: integral component of membrane (GO:0016021);; Biological Process: protein autophosphorylation (GO:0046777);;	K13437|8.1e-79|osa:107276510|K13437 receptor kinase-like protein | (RefSeq) probable LRR receptor-like serine/threonine-protein kinase At3g47570	Plant-pathogen interaction (ko04626)	Protein kinase domain	Receptor kinase-like protein Xa21 OS=Oryza sativa subsp. japonica OX=39947 GN=XA21 PE=1 SV=1	PREDICTED: probable LRR receptor-like serine/threonine-protein kinase At3g47570 [Gossypium hirsutum]	biological process: metabolic process (GO:0008152);; biological process: cellular process (GO:0009987);; molecular function: catalytic activity (GO:0003824);; molecular function: binding (GO:0005488);; cellular component: cell (GO:0005623);; cellular component: membrane (GO:0016020);; cellular component: cell part (GO:0044464);; cellular component: membrane part (GO:0044425)
Gh_A01G126900	42	At4g06744	0.00431537	-0.97129	normal	4.40602e-09	-1.6231	down	1.38171e-32	-2.46981	down	3.27277e-47	-6.52036	down	0.509697	0.129845	normal	1.84786e-16	-2.11034	down	3.68443e-11	-1.50885	down	4.60864e-44	-3.78508	down		0.746616	0.158339	normal	4.11534e-06	1.26285	up	0.519885	-0.34623	normal	1.28624e-05	1.13389	up	3.82683e-05	2.91217	up	--	--	--	Leucine rich repeat	Uncharacterized protein At4g06744 OS=Arabidopsis thaliana OX=3702 GN=At4g06744 PE=2 SV=1	PREDICTED: uncharacterized protein At4g06744-like [Gossypium hirsutum]	--
Gh_A01G130100	43	Gh_A01G130100	--	--	--	--	--	--	--	--	--	--	--	--	0.848845	-0.116514	normal	--	--	--	0.844794	-0.109351	normal	--	--	--		--	--	--	0.000457297	1.86362	up	--	--	--	0.116302	0.736342	normal	--	--	--	Molecular Function: squalene monooxygenase activity (GO:0004506);; Cellular Component: endoplasmic reticulum (GO:0005783);; Cellular Component: integral component of membrane (GO:0016021);; Biological Process: sterol biosynthetic process (GO:0016126);; Molecular Function: flavin adenine dinucleotide binding (GO:0050660);;	K00511|1.4e-303|ghi:107916766|K00511 squalene monooxygenase [EC:1.14.14.17] | (RefSeq) squalene monooxygenase-like	Steroid biosynthesis (ko00100);; Sesquiterpenoid and triterpenoid biosynthesis (ko00909)	Squalene epoxidase	Squalene monooxygenase SE1 OS=Panax ginseng OX=4054 GN=SQE1 PE=2 SV=1	PREDICTED: squalene monooxygenase-like [Gossypium hirsutum]	biological process: metabolic process (GO:0008152);; biological process: single-organism process (GO:0044699);; molecular function: catalytic activity (GO:0003824);; cellular component: cell (GO:0005623);; cellular component: organelle (GO:0043226);; cellular component: cell part (GO:0044464);; cellular component: membrane (GO:0016020);; cellular component: membrane part (GO:0044425);; molecular …
Gh_A01G133100	44	rhiE	--	--	--	0.579974	-1.63857	normal	0.219461	-1.70332	normal	0.0046613	-6.11093	down	0.00141315	-1.494	down	7.20199e-13	-3.83763	down	0.339551	-1.36906	normal	8.89461e-17	-5.04434	down		0.94466	-0.324397	normal	7.88527e-07	2.23663	up	--	--	--	0.978559	0.0493636	normal	--	--	--	Biological Process: carbohydrate metabolic process (GO:0005975);; Molecular Function: lyase activity (GO:0016829);; Molecular Function: carbohydrate binding (GO:0030246);;	K18195|0.0e+00|ghi:107918135|K18195 rhamnogalacturonan endolyase [EC:4.2.2.23] | (RefSeq) probable rhamnogalacturonate lyase B isoform X1	--	Rhamnogalacturonate lyase family	--	PREDICTED: probable rhamnogalacturonate lyase B isoform X1 [Gossypium hirsutum]	biological process: metabolic process (GO:0008152);; molecular function: catalytic activity (GO:0003824);; molecular function: binding (GO:0005488)
Gh_A01G133200	45	rhiE	--	--	--	0.578669	-1.6398	normal	0.0141988	-2.29092	down	0.00418085	-6.12635	down	0.00276138	-1.4334	down	2.84804e-12	-3.89273	down	0.371483	-1.29652	normal	4.81748e-16	-5.07522	down		0.929441	-0.390188	normal	1.25609e-06	2.16841	up	--	--	--	0.690552	0.642455	normal	--	--	--	Biological Process: carbohydrate metabolic process (GO:0005975);; Molecular Function: lyase activity (GO:0016829);; Molecular Function: carbohydrate binding (GO:0030246);;	K18195|0.0e+00|ghi:107918135|K18195 rhamnogalacturonan endolyase [EC:4.2.2.23] | (RefSeq) probable rhamnogalacturonate lyase B isoform X1	--	Rhamnogalacturonate lyase family	--	PREDICTED: probable rhamnogalacturonate lyase B isoform X1 [Gossypium hirsutum]	biological process: metabolic process (GO:0008152);; molecular function: catalytic activity (GO:0003824);; molecular function: binding (GO:0005488)
Gh_A01G135900	46	BRCA1	--	--	--	--	--	--	--	--	--	--	--	--	1.60116e-06	-3.62757	down	0.00397836	-5.28248	down	1.93489e-06	-2.67589	down	0.0539401	-4.15101	normal		0.880655	0.984325	normal	--	--	--	--	--	--	--	--	--	--	--	--	Biological Process: double-strand break repair via homologous recombination (GO:0000724);; Molecular Function: DNA binding (GO:0003677);; Molecular Function: ubiquitin-protein transferase activity (GO:0004842);; Cellular Component: plasma membrane (GO:0005886);; Molecular Function: zinc ion binding (GO:0008270);; Cellular Component: BRCA1-BARD1 complex (GO:0031436);; Biological Process: positive …	K10683|0.0e+00|ghi:107942613|K10683 BRCA1-associated RING domain protein 1 | (RefSeq) protein BREAST CANCER SUSCEPTIBILITY 1 homolog	Homologous recombination (ko03440)	BRCA1 C Terminus (BRCT) domain	Protein BREAST CANCER SUSCEPTIBILITY 1 homolog OS=Arabidopsis thaliana OX=3702 GN=BRCA1 PE=1 SV=1	PREDICTED: protein BREAST CANCER SUSCEPTIBILITY 1 homolog [Gossypium hirsutum]	biological process: metabolic process (GO:0008152);; biological process: cellular process (GO:0009987);; biological process: response to stimulus (GO:0050896);; molecular function: binding (GO:0005488);; molecular function: catalytic activity (GO:0003824);; cellular component: cell (GO:0005623);; cellular component: membrane (GO:0016020);; cellular component: cell part (GO:0044464);; cellular com…
Gh_A01G142700	47	NFYA1	--	--	--	2.24819e-12	9.43529	up	1.08869e-11	8.74354	up	8.97322e-14	9.88115	up	1.16272e-10	8.66388	up	2.13417e-13	9.7125	up	--	--	--	3.18449e-15	9.91524	up		--	--	--	0.977331	0.0266753	normal	0.923107	0.0967402	normal	1.11495e-08	-1.91548	down	0.793326	-0.0963023	normal	Molecular Function: RNA polymerase II core promoter proximal region sequence-specific DNA binding (GO:0000978);; Molecular Function: transcription factor activity, sequence-specific DNA binding (GO:0003700);; Cellular Component: nucleus (GO:0005634);; Biological Process: regulation of transcription, DNA-templated (GO:0006355);; Cellular Component: CCAAT-binding factor complex (GO:0016602);;	K08064|2.0e-205|ghi:107937210|K08064 nuclear transcription factor Y, alpha | (RefSeq) nuclear transcription factor Y subunit A-1-like	--	CCAAT-binding transcription factor (CBF-B/NF-YA) subunit B	Nuclear transcription factor Y subunit A-9 OS=Arabidopsis thaliana OX=3702 GN=NFYA9 PE=1 SV=1	PREDICTED: nuclear transcription factor Y subunit A-1-like [Gossypium hirsutum]	molecular function: binding (GO:0005488);; biological process: biological regulation (GO:0065007);; molecular function: nucleic acid binding transcription factor activity (GO:0001071);; cellular component: cell (GO:0005623);; cellular component: organelle (GO:0043226);; cellular component: cell part (GO:0044464);; cellular component: macromolecular complex (GO:0032991);; cellular component: organ…
Gh_A01G143800	48	AGP15	0.000158995	-0.895162	normal	0.000386331	-1.24433	down	0.878387	-0.0439832	normal	0.683686	-0.146233	normal	4.65327e-20	-2.65761	down	1.99596e-19	-3.39602	down	0.000471394	-0.99806	normal	7.27233e-16	-2.95325	down		0.000333457	1.34792	up	0.259434	-0.407587	normal	0.191857	-0.818484	normal	0.0782569	0.405409	normal	0.00213268	-1.43245	down	Cellular Component: integral component of membrane (GO:0016021);;	--	--	--	--	hypothetical protein ES319_A01G138300v1 [Gossypium barbadense]	cellular component: membrane (GO:0016020);; cellular component: membrane part (GO:0044425)
Gh_A01G144000	49	AGP15	0.999944	-4.96762e-05	normal	0.815721	-0.111718	normal	9.67949e-05	1.26845	up	2.49727e-12	2.34222	up	2.1379e-05	-1.95094	down	1.47933e-08	-3.29957	down	0.288253	-0.413423	normal	0.000707383	-1.41963	down		0.000113758	1.85958	up	0.9389	-0.0859706	normal	--	--	--	0.53309	0.191654	normal	2.47334e-07	-1.87137	down	Cellular Component: integral component of membrane (GO:0016021);;	--	--	--	--	hypothetical protein ES319_A01G138500v1 [Gossypium barbadense]	cellular component: membrane (GO:0016020);; cellular component: membrane part (GO:0044425)
Gh_A01G145200	50	RPS28	0.00192495	-0.763271	normal	5.62262e-07	-1.18419	down	0.0534438	-0.461604	normal	0.168604	-0.36293	normal	2.02958e-08	-1.30365	down	3.65911e-11	-1.70742	down	1.86821e-05	-0.970435	normal	3.76749e-09	-1.43198	down		0.205742	0.476278	normal	0.893764	-0.0574814	normal	0.908595	-0.066324	normal	0.944623	-0.0211879	normal	0.0596067	-0.563889	normal	Biological Process: ribosomal small subunit assembly (GO:0000028);; Molecular Function: structural constituent of ribosome (GO:0003735);; Biological Process: translation (GO:0006412);; Cellular Component: cytosolic small ribosomal subunit (GO:0022627);; Biological Process: maturation of SSU-rRNA (GO:0030490);;	K02979|2.2e-28|gab:108454795|K02979 small subunit ribosomal protein S28e | (RefSeq) 40S ribosomal protein S28	Ribosome (ko03010)	Ribosomal protein S28e	40S ribosomal protein S28 OS=Zea mays OX=4577 GN=RPS28 PE=3 SV=1	hypothetical protein B456_002G154400, partial [Gossypium raimondii]	biological process: cellular process (GO:0009987);; biological process: cellular component organization or biogenesis (GO:0071840);; molecular function: structural molecule activity (GO:0005198);; biological process: metabolic process (GO:0008152);; cellular component: cell (GO:0005623);; cellular component: macromolecular complex (GO:0032991);; cellular component: organelle (GO:0043226);; cellul…
Gh_A01G148700	51	RPS14C	0.0109135	-0.981502	normal	0.00287715	-0.96503	normal	0.0447892	-0.590528	normal	0.000606769	-1.61539	down	0.0039132	-1.04223	down	0.00206303	-1.05729	down	0.466053	-0.245522	normal	0.00641568	-0.915937	normal		0.903893	0.159929	normal	0.86027	0.102904	normal	0.911562	0.0488739	normal	0.00239116	0.518972	normal	0.0120149	0.893292	normal	Biological Process: ribosomal small subunit assembly (GO:0000028);; Biological Process: maturation of SSU-rRNA from tricistronic rRNA transcript (SSU-rRNA, 5.8S rRNA, LSU-rRNA) (GO:0000462);; Molecular Function: structural constituent of ribosome (GO:0003735);; Cellular Component: ribosome (GO:0005840);; Biological Process: translation (GO:0006412);; Molecular Function: mRNA 5'-UTR binding (GO:00…	K02955|3.7e-79|gab:108465943|K02955 small subunit ribosomal protein S14e | (RefSeq) 40S ribosomal protein S14-3	Ribosome (ko03010)	Ribosomal protein S11	40S ribosomal protein S14-3 OS=Arabidopsis thaliana OX=3702 GN=RPS14C PE=2 SV=2	hypothetical protein GOBAR_AA26900 [Gossypium barbadense]	biological process: cellular process (GO:0009987);; biological process: cellular component organization or biogenesis (GO:0071840);; biological process: metabolic process (GO:0008152);; molecular function: structural molecule activity (GO:0005198);; cellular component: cell (GO:0005623);; cellular component: macromolecular complex (GO:0032991);; cellular component: organelle (GO:0043226);; cellul…
Gh_A01G150800	52	PTL	0.202342	-0.709374	normal	0.223578	-0.993929	normal	5.866e-06	-2.47528	down	7.29524e-05	-2.75394	down	0.00218451	-1.1726	down	0.00156802	-1.36131	down	0.000451079	-1.53081	down	0.0338244	-0.835184	normal		0.595501	-0.543443	normal	0.0164526	-0.996047	normal	--	--	--	--	--	--	0.0199354	1.39446	up	Biological Process: reproduction (GO:0000003);; Biological Process: developmental process involved in reproduction (GO:0003006);; Molecular Function: molecular_function (GO:0003674);; Molecular Function: nucleic acid binding (GO:0003676);; Molecular Function: DNA binding (GO:0003677);; Molecular Function: transcription factor activity, sequence-specific DNA binding (GO:0003700);; Molecular Functi…	K01051|2.3e-11|var:108341535|K01051 pectinesterase [EC:3.1.1.11] | (RefSeq) probable pectinesterase/pectinesterase inhibitor 58	Pentose and glucuronate interconversions (ko00040)	Myb/SANT-like DNA-binding domain	Trihelix transcription factor PTL OS=Arabidopsis thaliana OX=3702 GN=PTL PE=1 SV=1	PREDICTED: trihelix transcription factor PTL-like [Gossypium hirsutum]	biological process: reproduction (GO:0000003);; biological process: reproductive process (GO:0022414);; biological process: developmental process (GO:0032502);; molecular function: binding (GO:0005488);; biological process: biological regulation (GO:0065007);; molecular function: nucleic acid binding transcription factor activity (GO:0001071);; cellular component: cell (GO:0005623);; cellular com…
Gh_A01G151200	53	XTH33	4.97171e-06	-2.7909	down	0.037812	-1.70932	down	0.00867236	-3.7065	down	3.16239e-07	-8.23004	down	0.00754771	-3.41221	down	0.00526402	-5.21238	down	2.49041e-10	-2.50021	down	0.000609386	-1.10981	down	-0.621312	0.0847588	0.860719	normal	--	--	--	--	--	--	--	--	--	5.74874e-07	8.00157	up	Molecular Function: hydrolase activity, hydrolyzing O-glycosyl compounds (GO:0004553);; Cellular Component: cell wall (GO:0005618);; Biological Process: xyloglucan metabolic process (GO:0010411);; Molecular Function: xyloglucan:xyloglucosyl transferase activity (GO:0016762);; Biological Process: cell wall biogenesis (GO:0042546);; Cellular Component: apoplast (GO:0048046);; Biological Process: ce…	K08235|2.8e-182|ghi:107894833|K08235 xyloglucan:xyloglucosyl transferase [EC:2.4.1.207] | (RefSeq) probable xyloglucan endotransglucosylase/hydrolase protein 33 isoform X1	--	Glycosyl hydrolases family 16	Probable xyloglucan endotransglucosylase/hydrolase protein 33 OS=Arabidopsis thaliana OX=3702 GN=XTH33 PE=1 SV=2	PREDICTED: probable xyloglucan endotransglucosylase/hydrolase protein 33 isoform X1 [Gossypium hirsutum]	molecular function: catalytic activity (GO:0003824);; cellular component: cell (GO:0005623);; cellular component: cell part (GO:0044464);; biological process: metabolic process (GO:0008152);; biological process: cellular process (GO:0009987);; biological process: cellular component organization or biogenesis (GO:0071840);; cellular component: extracellular region (GO:0005576)
Gh_A01G152000	54	MLP423	0.00090526	-0.790358	normal	5.48406e-08	-0.963117	normal	1.14848e-17	-1.76263	down	4.4736e-84	-5.43914	down	0.23531	-0.177964	normal	6.08332e-09	-1.43479	down	2.13914e-38	-1.80174	down	5.44663e-23	-3.25849	down		0.000420486	0.46711	normal	3.05778e-07	1.08489	up	0.970573	-0.0239381	normal	0.0475174	0.434948	normal	4.42788e-06	2.67297	up	Biological Process: defense response (GO:0006952);;	K10781|3.9e-20|psom:113347984|K10781 fatty acyl-ACP thioesterase B [EC:3.1.2.14 3.1.2.21] | (RefSeq) uncharacterized protein LOC113347984 isoform X1	Fatty acid biosynthesis (ko00061);; Fatty acid metabolism (ko01212)	Pathogenesis-related protein Bet v 1 family	MLP-like protein 423 OS=Arabidopsis thaliana OX=3702 GN=MLP423 PE=2 SV=1	PREDICTED: MLP-like protein 423 [Gossypium hirsutum]	biological process: response to stimulus (GO:0050896)
Gh_A01G159400	55	COR2	--	--	--	0.0410011	1.12271	up	0.95933	0.0296648	normal	--	--	--	0.00568215	-1.40017	down	0.67397	0.190656	normal	0.787781	0.140795	normal	0.223332	-0.507123	normal		0.731994	0.380099	normal	--	--	--	0.356964	-0.569927	normal	0.312923	0.499356	normal	--	--	--	Molecular Function: oxidoreductase activity (GO:0016491);;	K22374|5.6e-192|ghi:107937488|K22374 3''-deamino-3''-oxonicotianamine reductase [EC:1.1.1.285] | (RefSeq) non-functional NADPH-dependent codeinone reductase 2-like	--	Aldo/keto reductase family	Non-functional NADPH-dependent codeinone reductase 2 OS=Papaver somniferum OX=3469 GN=COR2 PE=1 SV=1	hypothetical protein GOBAR_AA31453 [Gossypium barbadense]	molecular function: catalytic activity (GO:0003824)
Gh_A01G163800	56	PECS-2.1	0.0706112	-0.875642	normal	9.33241e-11	-7.83659	down	1.09392e-13	-9.94756	down	7.55522e-09	-9.46279	down	1.28615e-31	-2.28575	down	3.18492e-20	-11.3796	down	2.96527e-22	-11.8337	down	8.9228e-24	-2.52869	down		7.89154e-05	1.74319	up	0.354758	0.345279	normal	--	--	--	--	--	--	4.42946e-08	8.70207	up	Molecular Function: enzyme inhibitor activity (GO:0004857);; Cellular Component: extracellular region (GO:0005576);; Cellular Component: cell wall (GO:0005618);; Molecular Function: pectinesterase activity (GO:0030599);; Biological Process: cell wall modification (GO:0042545);; Molecular Function: aspartyl esterase activity (GO:0045330);; Biological Process: pectin catabolic process (GO:0045490);;	K01051|5.7e-305|ghi:107903730|K01051 pectinesterase [EC:3.1.1.11] | (RefSeq) pectinesterase-like	Pentose and glucuronate interconversions (ko00040)	Pectinesterase	Probable pectinesterase/pectinesterase inhibitor 17 OS=Arabidopsis thaliana OX=3702 GN=PME17 PE=2 SV=2	PREDICTED: pectinesterase-like [Gossypium hirsutum]	biological process: biological regulation (GO:0065007);; molecular function: molecular function regulator (GO:0098772);; cellular component: extracellular region (GO:0005576);; cellular component: cell (GO:0005623);; cellular component: cell part (GO:0044464);; molecular function: catalytic activity (GO:0003824);; biological process: cellular process (GO:0009987);; biological process: cellular co…
Gh_A01G164000	57	Gh_A01G164000	0.0547428	-1.39669	normal	0.436636	-0.853496	normal	0.00397177	-1.99487	down	0.000278194	-3.36052	down	0.80495	0.131318	normal	0.00340336	-1.55478	down	0.251249	-1.38671	normal	6.72055e-08	-3.67279	down		0.781199	-0.513128	normal	0.000901503	1.01778	up	0.262224	-1.23723	normal	0.897408	0.128586	normal	--	--	--	Molecular Function: enzyme inhibitor activity (GO:0004857);;	K01051|1.4e-15|rcu:8276562|K01051 pectinesterase [EC:3.1.1.11] | (RefSeq) pectinesterase 3	Pentose and glucuronate interconversions (ko00040)	Plant invertase/pectin methylesterase inhibitor	21 kDa protein OS=Daucus carota OX=4039 PE=2 SV=1	PREDICTED: 21 kDa protein-like [Gossypium hirsutum]	biological process: biological regulation (GO:0065007);; molecular function: molecular function regulator (GO:0098772)
Gh_A01G164400	58	CEL1	--	--	--	--	--	--	0.366717	-1.02689	normal	--	--	--	0.65102	0.278851	normal	0.0348513	-1.28634	down	0.974997	0.0306389	normal	--	--	--		0.928697	0.271001	normal	9.27691e-07	2.83425	up	--	--	--	0.367189	1.36334	normal	--	--	--	Molecular Function: cellulase activity (GO:0008810);; Biological Process: cellulose catabolic process (GO:0030245);;	K01179|2.2e-263|gab:108474272|K01179 endoglucanase [EC:3.2.1.4] | (RefSeq) endoglucanase 8-like	Starch and sucrose metabolism (ko00500)	Glycosyl hydrolase family 9	Endoglucanase 8 OS=Arabidopsis thaliana OX=3702 GN=CEL1 PE=2 SV=1	hypothetical protein ES332_A01G176400v1 [Gossypium tomentosum]	molecular function: catalytic activity (GO:0003824);; biological process: metabolic process (GO:0008152);; biological process: cellular process (GO:0009987)
Gh_A01G164700	59	PCR2	0.863245	0.0950798	normal	0.116029	-0.772157	normal	0.00163389	-1.26364	down	0.178359	-0.696522	normal	0.210849	0.329694	normal	0.0172227	0.615328	normal	2.21169e-14	-2.61895	down	0.000455862	-1.02912	down		0.16478	0.796679	normal	0.000142111	1.04065	up	4.9265e-13	2.16289	up	0.177369	-0.557125	normal	0.192412	0.485776	normal	Cellular Component: integral component of membrane (GO:0016021);;	--	--	PLAC8 family	Protein PLANT CADMIUM RESISTANCE 2 OS=Arabidopsis thaliana OX=3702 GN=PCR2 PE=1 SV=1	PREDICTED: protein PLANT CADMIUM RESISTANCE 2-like [Gossypium hirsutum]	cellular component: membrane (GO:0016020);; cellular component: membrane part (GO:0044425)
Gh_A01G171400	60	MYB4	0.956557	0.0563956	normal	0.440278	-0.498784	normal	0.0106275	-1.66357	down	3.75085e-06	-5.14973	down	2.73313e-05	0.953992	normal	1.74421e-11	-1.80691	down	2.28227e-11	-1.50104	down	3.71735e-15	-3.25161	down		0.107778	0.957403	normal	0.0397125	1.85947	up	0.609175	-0.369612	normal	0.0210778	1.13565	up	--	--	--	Molecular Function: DNA binding (GO:0003677);; Cellular Component: nucleus (GO:0005634);;	K09422|5.2e-150|ghi:107916963|K09422 transcription factor MYB, plant | (RefSeq) myb-related protein 308-like	--	Myb-like DNA-binding domain	Transcription repressor MYB4 OS=Arabidopsis thaliana OX=3702 GN=MYB4 PE=1 SV=1	PREDICTED: myb-related protein 308-like [Gossypium hirsutum]	molecular function: binding (GO:0005488);; cellular component: cell (GO:0005623);; cellular component: organelle (GO:0043226);; cellular component: cell part (GO:0044464)
Gh_A01G174700	61	MAD2	--	--	--	--	--	--	--	--	--	3.4924e-06	-8.92934	down	0.00305354	-1.69904	down	5.65874e-06	-3.91882	down	0.0375789	-4.50348	down	4.64675e-11	-8.95991	down		0.936781	-0.240724	normal	--	--	--	--	--	--	--	--	--	--	--	--	Cellular Component: kinetochore (GO:0000776);; Cellular Component: nucleoplasm (GO:0005654);; Cellular Component: cytoplasm (GO:0005737);; Biological Process: mitotic spindle assembly checkpoint (GO:0007094);;	K02537|5.3e-113|ghi:107916990|K02537 mitotic spindle assembly checkpoint protein MAD2 | (RefSeq) mitotic spindle checkpoint protein MAD2-like	--	HORMA domain	Mitotic spindle checkpoint protein MAD2 OS=Arabidopsis thaliana OX=3702 GN=MAD2 PE=1 SV=1	PREDICTED: mitotic spindle checkpoint protein MAD2-like [Gossypium hirsutum]	cellular component: cell (GO:0005623);; cellular component: macromolecular complex (GO:0032991);; cellular component: organelle (GO:0043226);; cellular component: organelle part (GO:0044422);; cellular component: cell part (GO:0044464);; biological process: cellular process (GO:0009987);; biological process: single-organism process (GO:0044699);; biological process: biological regulation (GO:0065…
Gh_A01G176400	62	JGB	0.134519	-0.672581	normal	0.786719	-0.115238	normal	0.793239	0.101611	normal	9.36055e-14	-5.21554	down	4.55457e-08	-1.23593	down	0.103039	-0.666238	normal	0.51814	0.114096	normal	0.00588849	-0.708132	normal		0.223919	0.556724	normal	0.993686	0.00574562	normal	0.99156	-0.0107766	normal	0.00469755	0.568752	normal	2.10091e-16	5.08672	up	Molecular Function: nucleotide binding (GO:0000166);; Biological Process: mitotic cell cycle (GO:0000278);; Biological Process: mitotic cytokinesis (GO:0000281);; Biological Process: cytokinesis (GO:0000910);; Molecular Function: molecular_function (GO:0003674);; Molecular Function: catalytic activity (GO:0003824);; Molecular Function: protein kinase activity (GO:0004672);; Molecular Function: pr…	K03070|5.3e-06|pmum:103319773|K03070 preprotein translocase subunit SecA [EC:7.4.2.8] | (RefSeq) protein translocase subunit SECA2, chloroplastic	Protein export (ko03060)	WD domain, G-beta repeat	Protein JINGUBANG OS=Arabidopsis thaliana OX=3702 GN=JGB PE=1 SV=1	PREDICTED: uncharacterized WD repeat-containing protein alr3466-like [Gossypium hirsutum]	molecular function: binding (GO:0005488);; biological process: cellular process (GO:0009987);; biological process: single-organism process (GO:0044699);; molecular function: catalytic activity (GO:0003824);; biological process: metabolic process (GO:0008152);; cellular component: cell (GO:0005623);; cellular component: cell part (GO:0044464);; cellular component: organelle (GO:0043226);; cellular…
Gh_A01G176700	63	Gh_A01G176700	0.387768	0.28654	normal	0.00293232	0.50381	normal	0.0001173	0.69951	normal	3.65066e-08	0.966639	normal	7.26903e-12	1.24191	up	0.664552	0.13454	normal	0.0150587	0.479471	normal	0.00107338	0.677127	normal		0.948556	0.050633	normal	4.09284e-05	1.00997	up	0.34286	-0.33983	normal	0.402378	-0.158071	normal	0.298434	-0.212507	normal	Molecular Function: hydrolase activity, hydrolyzing O-glycosyl compounds (GO:0004553);; Biological Process: carbohydrate metabolic process (GO:0005975);;	K01179|7.9e-135|sind:105164045|K01179 endoglucanase [EC:3.2.1.4] | (RefSeq) uncharacterized protein LOC105164045	Starch and sucrose metabolism (ko00500)	Cellulase (glycosyl hydrolase family 5)	Glycosyl hydrolase 5 family protein OS=Chamaecyparis obtusa OX=13415 PE=1 SV=1	PREDICTED: uncharacterized protein LOC107951507 [Gossypium hirsutum]	molecular function: catalytic activity (GO:0003824);; biological process: metabolic process (GO:0008152)
Gh_A01G177000	64	MKP1	1.12224e-05	0.871486	normal	2.53229e-08	0.906479	normal	3.87462e-49	2.49619	up	6.21865e-94	3.55303	up	1.82989e-07	1.018	up	6.7752e-12	1.65764	up	2.05091e-19	1.58618	up	5.43541e-75	2.76584	up		0.953717	-0.0478539	normal	0.715436	0.105467	normal	0.00610515	0.681967	normal	1.68397e-11	-0.949935	normal	2.01142e-14	-0.808207	normal	Molecular Function: protein tyrosine phosphatase activity (GO:0004725);; Molecular Function: protein tyrosine/serine/threonine phosphatase activity (GO:0008138);; Molecular Function: actin filament binding (GO:0051015);;	K10999|2.4e-151|han:110910338|K10999 cellulose synthase A [EC:2.4.1.12] | (RefSeq) cellulose synthase A catalytic subunit 4 [UDP-forming] isoform X1	--	Dual specificity phosphatase, catalytic domain	Protein-tyrosine-phosphatase MKP1 OS=Arabidopsis thaliana OX=3702 GN=MKP1 PE=1 SV=1	PREDICTED: protein-tyrosine-phosphatase MKP1-like isoform X1 [Gossypium hirsutum]	biological process: metabolic process (GO:0008152);; biological process: cellular process (GO:0009987);; molecular function: catalytic activity (GO:0003824);; molecular function: binding (GO:0005488)
Gh_A01G177800	65	At1g67900	0.00138606	-0.829909	normal	0.50863	-0.172435	normal	0.0221558	-0.73933	normal	5.2313e-22	-4.03972	down	6.41698e-09	-1.15661	down	0.000511794	-0.74802	normal	0.621341	-0.0857945	normal	0.00767529	-0.479595	normal		0.19652	0.338647	normal	0.976225	0.0160753	normal	0.506997	-0.256286	normal	7.894e-05	0.994572	normal	1.37754e-22	3.9235	up	Cellular Component: cellular_component (GO:0005575);; Cellular Component: cell (GO:0005623);; Cellular Component: plasma membrane (GO:0005886);; Cellular Component: membrane (GO:0016020);; Cellular Component: cell part (GO:0044464);; Cellular Component: cell periphery (GO:0071944);;	--	--	NPH3 family	BTB/POZ domain-containing protein At1g67900 OS=Arabidopsis thaliana OX=3702 GN=At1g67900 PE=1 SV=1	hypothetical protein E1A91_A01G172800v1 [Gossypium mustelinum]	cellular component: cell (GO:0005623);; cellular component: membrane (GO:0016020);; cellular component: cell part (GO:0044464)
Gh_A01G184000	66	MGS1	0.247257	-0.382416	normal	0.00118787	-0.762672	normal	0.00339166	-0.7271	normal	1.83784e-17	-3.3711	down	0.349743	0.155246	normal	0.000118431	-1.51422	down	2.99743e-06	-0.776387	normal	6.53914e-14	-1.92794	down		0.006761	0.65943	normal	3.12426e-08	1.20267	up	0.902321	-0.111005	normal	0.00223504	0.613628	normal	1.82858e-05	2.12105	up	Cellular Component: integral component of membrane (GO:0016021);;	--	--	Pollen protein Ole e 1 like	--	hypothetical protein ES319_A01G174000v1 [Gossypium barbadense]	cellular component: membrane (GO:0016020);; cellular component: membrane part (GO:0044425)
Gh_A01G185100	67	DIR15	0.250356	-0.695352	normal	0.736082	-0.225569	normal	2.54811e-07	-2.8055	down	2.68735e-06	-3.16495	down	3.42045e-05	-1.05793	down	5.48463e-07	-1.43208	down	6.07532e-19	-2.27108	down	1.00114e-17	-2.28691	down		0.793834	0.371301	normal	0.981694	0.00869741	normal	0.00192322	-0.854979	normal	0.00310978	0.92594	normal	1.79343e-05	1.28671	up	Cellular Component: apoplast (GO:0048046);;	--	--	Dirigent-like protein	Dirigent protein 15 OS=Arabidopsis thaliana OX=3702 GN=DIR15 PE=3 SV=1	hypothetical protein ES319_A01G175200v1 [Gossypium barbadense]	cellular component: extracellular region (GO:0005576)
Gh_A01G186100	68	At1g75040	--	--	--	0.209743	-2.70608	normal	--	--	--	3.72718e-06	-9.0783	down	0.024098	-1.22322	down	1.58863e-07	-2.82234	down	0.000160048	-1.83198	down	2.53041e-11	-8.80262	down		0.812516	-0.548055	normal	--	--	--	--	--	--	--	--	--	--	--	--	Cellular Component: integral component of membrane (GO:0016021);;	K12173|1.2e-43|gmx:100794341|K12173 BRCA1-A complex subunit BRE | (RefSeq) BRISC and BRCA1-A complex member 2	Homologous recombination (ko03440)	Thaumatin family	Thaumatin-like protein 1 OS=Arabidopsis thaliana OX=3702 GN=TLP1 PE=2 SV=1	PREDICTED: thaumatin-like protein 1b [Gossypium hirsutum]	cellular component: membrane (GO:0016020);; cellular component: membrane part (GO:0044425)
Gh_A01G192800	69	EXLA1	0.072668	0.738652	normal	0.00299483	0.935892	normal	9.11143e-15	2.1301	up	0.102449	0.595377	normal	9.04739e-10	-1.60373	down	1.17597e-07	-1.88673	down	0.0132262	0.659392	normal	0.0314095	-0.820074	normal		2.06017e-05	1.60848	up	0.0431623	-0.725491	normal	0.00119465	-1.23058	down	0.53911	0.141686	normal	0.638672	0.218097	normal	Cellular Component: extracellular region (GO:0005576);; Cellular Component: plant-type cell wall (GO:0009505);; Cellular Component: plasmodesma (GO:0009506);; Biological Process: sexual reproduction (GO:0019953);;	K20628|6.9e-25|ppp:112294361|K20628 expansin | (RefSeq) expansin-B3-like	--	Expansin C-terminal domain	Expansin-like A2 OS=Arabidopsis thaliana OX=3702 GN=EXLA2 PE=2 SV=1	PREDICTED: expansin-like A2 [Gossypium hirsutum]	cellular component: extracellular region (GO:0005576);; cellular component: cell (GO:0005623);; cellular component: cell part (GO:0044464);; cellular component: cell junction (GO:0030054);; biological process: reproduction (GO:0000003);; biological process: reproductive process (GO:0022414);; biological process: multi-organism process (GO:0051704)
Gh_A01G195600	70	Gh_A01G195600	--	--	--	--	--	--	--	--	--	1.0089e-06	-9.18463	down	0.00034456	-1.49596	down	5.82726e-13	-9.47087	down	0.000566124	-4.42897	down	3.03695e-15	-5.54414	down		0.977365	0.0898305	normal	--	--	--	--	--	--	--	--	--	--	--	--	Cellular Component: host cell nucleus (GO:0042025);;	K21777|2.3e-232|gab:108461437|K21777 G2/mitotic-specific cyclin-B, other | (RefSeq) G2/mitotic-specific cyclin-2-like isoform X1	--	Cyclin, N-terminal domain	G2/mitotic-specific cyclin-1 OS=Medicago sativa subsp. varia OX=36902 PE=2 SV=1	PREDICTED: G2/mitotic-specific cyclin-2-like isoform X2 [Gossypium arboreum]	cellular component: other organism (GO:0044215);; cellular component: other organism part (GO:0044217)
Gh_A01G203100	71	Gh_A01G203100	0.129516	0.601621	normal	4.73723e-15	2.14655	up	5.49595e-05	1.08977	up	4.60529e-07	1.68233	up	3.60363e-30	-1.77479	down	0.00189004	-0.796286	normal	3.7344e-25	-1.62055	down	1.58987e-06	-0.807878	normal		3.20635e-11	1.80847	up	0.081567	-0.558478	normal	8.06899e-05	-1.15031	down	6.67273e-10	-0.896267	normal	0.00024747	-0.654955	normal	--	--	--	Protein of unknown function (DUF1005)	--	PREDICTED: uncharacterized protein LOC107925469 [Gossypium hirsutum]	--
Gh_A01G204000	72	XLG1	--	--	--	--	--	--	5.21109e-08	3.99556	up	--	--	--	9.93355e-05	1.93998	up	--	--	--	1.68113e-06	2.56663	up	0.00062975	1.91432	up		--	--	--	2.96128e-11	3.48018	up	--	--	--	0.692284	0.189178	normal	0.113802	1.31066	normal	Molecular Function: GTPase activity (GO:0003924);; Biological Process: G-protein coupled receptor signaling pathway (GO:0007186);; Molecular Function: guanyl nucleotide binding (GO:0019001);; Molecular Function: G-protein beta/gamma-subunit complex binding (GO:0031683);;	K19729|4.6e-12|aof:109848696|K19729 guanine nucleotide-binding protein G(t) subunit alpha 3 | (RefSeq) guanine nucleotide-binding protein alpha-1 subunit isoform X1	--	--	Extra-large guanine nucleotide-binding protein 1 OS=Arabidopsis thaliana OX=3702 GN=XLG1 PE=1 SV=2	PREDICTED: extra-large guanine nucleotide-binding protein 1-like isoform X2 [Gossypium raimondii]	molecular function: catalytic activity (GO:0003824);; biological process: cellular process (GO:0009987);; biological process: signaling (GO:0023052);; biological process: single-organism process (GO:0044699);; biological process: response to stimulus (GO:0050896);; biological process: biological regulation (GO:0065007);; molecular function: binding (GO:0005488)
Gh_A01G207400	73	At4g24290	0.00744593	0.968853	normal	0.000632393	1.17597	up	4.42869e-11	2.53884	up	3.81414e-28	4.03711	up	2.87039e-07	1.14212	up	1.34993e-16	2.12761	up	0.000101737	0.989851	normal	1.08619e-23	2.50832	up		0.131171	0.832237	normal	5.47916e-07	1.01528	up	6.2205e-14	1.76285	up	0.0117099	-0.709326	normal	0.00641593	-0.669872	normal	--	--	--	MAC/Perforin domain	MACPF domain-containing protein At4g24290 OS=Arabidopsis thaliana OX=3702 GN=At4g24290 PE=2 SV=1	hypothetical protein ES319_A01G196100v1 [Gossypium barbadense]	--
Gh_A01G212300	74	PDS5A	0.000828343	-1.3379	down	4.89279e-09	-2.45579	down	0.0015839	-1.26197	down	0.0454026	-0.887302	normal	7.66885e-10	-2.25641	down	2.15112e-07	-2.58075	down	4.4232e-06	-1.34999	down	2.49367e-05	-1.39747	down	-0.918517	0.818769	0.222842	normal	--	--	--	--	--	--	0.735036	0.146828	normal	0.587653	-0.256024	normal	Biological Process: mitotic sister chromatid cohesion (GO:0007064);;	K11267|0.0e+00|ghi:107922589|K11267 sister chromatid cohesion protein PDS5 | (RefSeq) sister chromatid cohesion protein PDS5 homolog A isoform X1	--	non-SMC mitotic condensation complex subunit 1	--	hypothetical protein ES319_A01G200600v1 [Gossypium barbadense]	biological process: cellular process (GO:0009987);; biological process: single-organism process (GO:0044699);; biological process: cellular component organization or biogenesis (GO:0071840)
Gh_A01G213100	75	Gh_A01G213100	--	--	--	0.00197499	1.93516	up	2.6971e-06	2.36927	up	--	--	--	0.00608699	1.05695	up	0.0224351	-1.12401	down	0.61513	-0.247572	normal	0.423021	-0.389287	normal		0.0001425	2.70729	up	6.61707e-33	3.32602	up	0.597524	-0.372097	normal	0.776138	0.0984816	normal	0.405461	0.484009	normal	Molecular Function: protein disulfide isomerase activity (GO:0003756);; Cellular Component: endoplasmic reticulum (GO:0005783);; Biological Process: protein folding (GO:0006457);; Biological Process: response to endoplasmic reticulum stress (GO:0034976);; Biological Process: cell redox homeostasis (GO:0045454);;	K09580|1.3e-287|ghi:107939005|K09580 protein disulfide-isomerase A1 [EC:5.3.4.1] | (RefSeq) protein disulfide-isomerase-like	Protein processing in endoplasmic reticulum (ko04141)	Thioredoxin	Protein disulfide-isomerase OS=Ricinus communis OX=3988 PE=2 SV=1	PREDICTED: protein disulfide-isomerase-like [Gossypium hirsutum]	molecular function: catalytic activity (GO:0003824);; cellular component: cell (GO:0005623);; cellular component: organelle (GO:0043226);; cellular component: cell part (GO:0044464);; biological process: cellular process (GO:0009987);; biological process: response to stimulus (GO:0050896);; biological process: single-organism process (GO:0044699);; biological process: biological regulation (GO:00…
Gh_A01G214700	76	PAPP5	0.291676	-0.466467	normal	0.0218433	-0.931798	normal	5.99725e-07	-2.01534	down	8.58234e-08	-3.04776	down	0.0107853	-1.11664	down	0.385796	-0.365188	normal	0.00766515	-1.12866	down	0.0235255	-0.907877	normal		0.862512	-0.216581	normal	0.0478624	-0.859281	normal	0.530434	0.32949	normal	0.152805	0.684701	normal	0.000800945	1.95324	up	Cellular Component: integral component of membrane (GO:0016021);;	K04460|8.7e-18|cmax:111468380|K04460 serine/threonine-protein phosphatase 5 [EC:3.1.3.16] | (RefSeq) serine/threonine-protein phosphatase 5	--	Protein of unknown function (DUF1068)	Serine/threonine-protein phosphatase 5 OS=Solanum lycopersicum OX=4081 GN=PP5 PE=1 SV=1	hypothetical protein ES288_A01G219400v1 [Gossypium darwinii]	cellular component: membrane (GO:0016020);; cellular component: membrane part (GO:0044425)
Gh_A01G217000	77	KIN14L	--	--	--	0.0390465	-3.39614	down	0.00215286	-2.87466	down	0.0144536	-5.48678	down	1.74333e-14	-3.82583	down	2.46066e-18	-6.67451	down	3.92329e-10	-2.89693	down	1.27035e-15	-8.01362	down		0.985101	-0.0999735	normal	--	--	--	--	--	--	0.880528	-0.0880807	normal	--	--	--	Molecular Function: microtubule motor activity (GO:0003777);; Molecular Function: ATP binding (GO:0005524);; Biological Process: microtubule-based movement (GO:0007018);; Molecular Function: microtubule binding (GO:0008017);;	K10406|0.0e+00|ghi:107922535|K10406 kinesin family member C2/C3 | (RefSeq) uncharacterized protein LOC107922535 isoform X1	--	Kinesin motor domain	Kinesin-like protein KIN-14L OS=Arabidopsis thaliana OX=3702 GN=KIN14L PE=3 SV=2	PREDICTED: kinesin-4-like isoform X3 [Gossypium hirsutum]	molecular function: catalytic activity (GO:0003824);; molecular function: binding (GO:0005488);; biological process: cellular process (GO:0009987);; biological process: single-organism process (GO:0044699)
Gh_A01G222400	78	dfr1	0.738713	-0.183942	normal	0.63739	-0.204319	normal	0.973559	-0.0114993	normal	0.0200253	0.860876	normal	7.01366e-09	0.611571	normal	4.83594e-05	-0.834597	normal	4.43805e-12	-0.935339	normal	3.7806e-23	-1.22447	down		0.16388	0.622604	normal	4.9586e-07	1.42064	up	0.958248	-0.0305499	normal	0.0947156	-0.282619	normal	9.09696e-31	-1.42963	down	--	--	--	Serine hydrolase (FSH1)	--	hypothetical protein ES319_A01G210100v1 [Gossypium barbadense]	--
Gh_A01G222900	79	frr	--	--	--	--	--	--	0.00097818	2.42423	up	--	--	--	0.0138089	-1.18161	down	0.00336946	-1.40037	down	8.37732e-08	1.56747	up	0.00179038	-1.41787	down		0.574126	0.974792	normal	--	--	--	--	--	--	0.547135	0.148099	normal	--	--	--	Biological Process: translation (GO:0006412);;	K02838|1.1e-139|gab:108466465|K02838 ribosome recycling factor | (RefSeq) ribosome-recycling factor	--	Ribosome recycling factor	--	PREDICTED: ribosome-recycling factor [Gossypium arboreum]	biological process: metabolic process (GO:0008152);; biological process: cellular process (GO:0009987)
Gh_A01G223000	80	RPL21A	0.000401488	-0.916985	normal	4.39645e-08	-1.3098	down	0.0096179	-0.549992	normal	0.0379282	-0.626708	normal	1.47932e-07	-1.00785	down	3.81849e-11	-1.35126	down	0.00434875	-0.514629	normal	6.10492e-06	-0.882736	normal		0.612601	0.285936	normal	0.406991	0.200911	normal	0.364673	0.225369	normal	0.0110303	0.333804	normal	0.797504	0.0586674	normal	Molecular Function: structural constituent of ribosome (GO:0003735);; Cellular Component: ribosome (GO:0005840);; Biological Process: translation (GO:0006412);;	K02889|1.3e-90|ghi:107922438|K02889 large subunit ribosomal protein L21e | (RefSeq) 60S ribosomal protein L21-1	Ribosome (ko03010)	Ribosomal protein L21e	60S ribosomal protein L21-1 OS=Arabidopsis thaliana OX=3702 GN=RPL21A PE=2 SV=2	PREDICTED: 60S ribosomal protein L21-1 [Gossypium raimondii]	molecular function: structural molecule activity (GO:0005198);; cellular component: cell (GO:0005623);; cellular component: macromolecular complex (GO:0032991);; cellular component: organelle (GO:0043226);; cellular component: cell part (GO:0044464);; biological process: metabolic process (GO:0008152);; biological process: cellular process (GO:0009987)
Gh_A01G224200	81	Donson	--	--	--	--	--	--	--	--	--	--	--	--	0.00431068	-1.35172	down	1.6069e-07	-3.01037	down	8.45359e-06	-2.08261	down	0.114724	-3.66914	normal		0.610171	0.920965	normal	--	--	--	--	--	--	--	--	--	--	--	--	Cellular Component: nucleus (GO:0005634);; Biological Process: nuclear DNA replication (GO:0033260);;	K22422|0.0e+00|ghi:107925687|K22422 protein downstream neighbor of Son | (RefSeq) protein downstream neighbor of Son-like	--	--	--	PREDICTED: protein downstream neighbor of Son-like [Gossypium hirsutum]	cellular component: cell (GO:0005623);; cellular component: organelle (GO:0043226);; cellular component: cell part (GO:0044464);; biological process: metabolic process (GO:0008152);; biological process: cellular process (GO:0009987);; biological process: single-organism process (GO:0044699)
Gh_A01G228200	82	OFP13	--	--	--	--	--	--	--	--	--	--	--	--	2.04253e-09	-5.59575	down	3.47888e-10	-8.51089	down	2.63259e-09	-4.59816	down	1.45388e-10	-8.58587	down		0.93718	-0.19677	normal	--	--	--	--	--	--	--	--	--	--	--	--	Cellular Component: nucleus (GO:0005634);; Biological Process: negative regulation of transcription, DNA-templated (GO:0045892);;	--	--	Transcriptional repressor, ovate	Transcription repressor OFP13 OS=Arabidopsis thaliana OX=3702 GN=OFP13 PE=1 SV=1	PREDICTED: transcription repressor OFP15-like [Gossypium hirsutum]	cellular component: cell (GO:0005623);; cellular component: organelle (GO:0043226);; cellular component: cell part (GO:0044464);; biological process: biological regulation (GO:0065007)
Gh_A01G228900	83	Gh_A01G228900	0.073768	-1.93835	normal	0.981574	0.0382883	normal	0.14741	1.27499	normal	0.0101747	2.50642	up	0.0861194	-1.89873	normal	0.0105453	-2.58936	down	0.846638	-0.350647	normal	0.00299479	2.68907	up		0.25809	2.21568	normal	0.00273135	2.26794	up	0.877978	-0.423089	normal	0.750076	0.589123	normal	0.000116086	2.41311	up	--	K13070|1.3e-74|dosa:Os04t0179200-01|K13070 momilactone-A synthase [EC:1.1.1.295] | (RefSeq) Os04g0179200, MAS, MOMILACTONE_A_SYNTHASE; Similar to Stem secoisolariciresinol dehydrogenase (Fragment).	Diterpenoid biosynthesis (ko00904)	Enoyl-(Acyl carrier protein) reductase	Secoisolariciresinol dehydrogenase (Fragment) OS=Forsythia intermedia OX=55183 PE=1 SV=1	PREDICTED: secoisolariciresinol dehydrogenase-like [Gossypium hirsutum]	--
Gh_A01G229000	84	Gh_A01G229000	0.0653445	-1.98705	normal	0.98368	0.0340868	normal	0.148939	1.27901	normal	0.00934774	2.52479	up	0.0843028	-1.91241	normal	0.0102517	-2.58393	down	0.844314	-0.357381	normal	0.00285126	2.69456	up		0.254053	2.22557	normal	0.00215076	2.31291	up	0.883853	-0.403652	normal	0.752335	0.588285	normal	8.47088e-05	2.41028	up	--	K13070|1.3e-74|dosa:Os04t0179200-01|K13070 momilactone-A synthase [EC:1.1.1.295] | (RefSeq) Os04g0179200, MAS, MOMILACTONE_A_SYNTHASE; Similar to Stem secoisolariciresinol dehydrogenase (Fragment).	Diterpenoid biosynthesis (ko00904)	Enoyl-(Acyl carrier protein) reductase	Secoisolariciresinol dehydrogenase (Fragment) OS=Forsythia intermedia OX=55183 PE=1 SV=1	PREDICTED: secoisolariciresinol dehydrogenase-like [Gossypium hirsutum]	--
Gh_A01G240700	85	PAL	0.000624556	-0.767416	normal	4.06649e-09	-1.46601	down	5.18219e-15	-3.71039	down	5.29173e-50	-7.94732	down	6.28591e-05	0.470444	normal	3.3715e-24	-1.44616	down	9.21081e-61	-2.68236	down	1.96729e-09	-3.33676	down		0.38328	0.306916	normal	2.94607e-31	1.54725	up	0.314257	0.303937	normal	0.0601705	1.34985	normal	1.08363e-06	4.94046	up	Cellular Component: cytoplasm (GO:0005737);; Biological Process: L-phenylalanine catabolic process (GO:0006559);; Biological Process: cinnamic acid biosynthetic process (GO:0009800);; Molecular Function: phenylalanine ammonia-lyase activity (GO:0045548);;	K10775|0.0e+00|ghi:107905303|K10775 phenylalanine ammonia-lyase [EC:4.3.1.24] | (RefSeq) phenylalanine ammonia-lyase-like	Phenylalanine metabolism (ko00360);; Phenylpropanoid biosynthesis (ko00940)	Aromatic amino acid lyase	Phenylalanine ammonia-lyase OS=Populus trichocarpa OX=3694 GN=PAL PE=2 SV=1	hypothetical protein ES332_A01G252500v1 [Gossypium tomentosum]	cellular component: cell (GO:0005623);; cellular component: cell part (GO:0044464);; biological process: metabolic process (GO:0008152);; biological process: cellular process (GO:0009987);; biological process: single-organism process (GO:0044699);; molecular function: catalytic activity (GO:0003824)
Gh_A01G241200	86	PIP2-2	0.0167721	-0.841587	normal	7.31943e-13	-2.12374	down	3.25797e-62	-5.27453	down	4.57957e-13	-3.86907	down	1.21461e-17	-1.04487	down	2.05558e-67	-2.05921	down	6.53336e-163	-4.89324	down	1.1973e-24	-2.2517	down		0.737874	-0.213426	normal	0.159609	-0.409255	normal	0.61304	-0.168436	normal	0.679796	0.164181	normal	0.00337694	1.42058	up	Molecular Function: channel activity (GO:0015267);; Cellular Component: integral component of membrane (GO:0016021);;	K09872|2.8e-160|gra:105786423|K09872 aquaporin PIP | (RefSeq) aquaporin PIP2-2-like	--	Major intrinsic protein	Aquaporin PIP2-2 OS=Arabidopsis thaliana OX=3702 GN=PIP2-2 PE=1 SV=2	hypothetical protein ES332_A01G253000v1 [Gossypium tomentosum]	biological process: localization (GO:0051179);; molecular function: transporter activity (GO:0005215);; cellular component: membrane (GO:0016020);; cellular component: membrane part (GO:0044425)
Gh_A01G245900	87	At2g37470	1.31798e-05	-0.919573	normal	0.000131034	-0.581727	normal	0.389343	-0.203196	normal	0.758679	-0.092386	normal	6.64345e-06	-1.00183	down	1.81394e-10	-1.51789	down	0.00281504	-0.599173	normal	0.730062	0.0807399	normal		0.736262	0.187907	normal	0.753118	0.113143	normal	0.000208014	-0.769442	normal	0.358816	-0.200305	normal	0.130897	0.386697	normal	Cellular Component: nucleosome (GO:0000786);; Molecular Function: DNA binding (GO:0003677);; Cellular Component: nucleus (GO:0005634);; Molecular Function: protein heterodimerization activity (GO:0046982);;	K11252|3.7e-54|ghi:107905251|K11252 histone H2B | (RefSeq) probable histone H2B.3	--	Core histone H2A/H2B/H3/H4	Histone H2B.8 OS=Arabidopsis thaliana OX=3702 GN=At3g53650 PE=1 SV=3	hypothetical protein ES319_A01G232500v1 [Gossypium barbadense]	cellular component: cell (GO:0005623);; cellular component: macromolecular complex (GO:0032991);; cellular component: organelle (GO:0043226);; cellular component: organelle part (GO:0044422);; cellular component: cell part (GO:0044464);; molecular function: binding (GO:0005488)
Gh_A01G246100	88	At5g02560	0.197036	-0.584241	normal	0.383507	-0.396704	normal	0.00791376	-0.98748	normal	0.580591	-0.278601	normal	0.0164122	-1.01464	down	0.000148718	-1.04368	down	2.19887e-05	-1.06615	down	0.00258435	-0.807572	normal		0.849827	0.242494	normal	0.40516	-0.183421	normal	0.0304758	-0.425157	normal	0.254216	0.183278	normal	0.0496228	-0.252553	normal	Cellular Component: nucleosome (GO:0000786);; Cellular Component: nuclear chromatin (GO:0000790);; Molecular Function: DNA binding (GO:0003677);; Biological Process: chromatin organization (GO:0006325);; Biological Process: chromatin silencing (GO:0006342);; Molecular Function: protein heterodimerization activity (GO:0046982);;	K11251|1.5e-72|gab:108462857|K11251 histone H2A | (RefSeq) histone H2A-like	--	C-terminus of histone H2A	Histone H2A OS=Euphorbia esula OX=3993 PE=2 SV=1	PREDICTED: histone H2A-like [Gossypium raimondii]	cellular component: cell (GO:0005623);; cellular component: macromolecular complex (GO:0032991);; cellular component: organelle (GO:0043226);; cellular component: organelle part (GO:0044422);; cellular component: cell part (GO:0044464);; cellular component: membrane-enclosed lumen (GO:0031974);; molecular function: binding (GO:0005488);; biological process: cellular process (GO:0009987);; biologi…
Gh_A01G246200	89	Gh_A01G246200	0.202977	-0.728324	normal	0.254314	-0.670691	normal	0.0113034	-1.21766	down	0.0337445	-1.33685	down	0.00831652	-1.25376	down	2.30021e-08	-1.69612	down	0.000885739	-1.50924	down	5.19303e-07	-1.49306	down		0.81323	0.475464	normal	0.856447	-0.0476846	normal	0.0415542	-0.570331	normal	0.319529	0.209462	normal	0.0198169	0.356488	normal	Cellular Component: nucleosome (GO:0000786);; Molecular Function: DNA binding (GO:0003677);; Cellular Component: nucleus (GO:0005634);; Molecular Function: protein heterodimerization activity (GO:0046982);;	K11251|1.7e-76|gab:108462753|K11251 histone H2A | (RefSeq) histone H2A-like	--	C-terminus of histone H2A	Histone H2A OS=Euphorbia esula OX=3993 PE=2 SV=1	PREDICTED: histone H2A-like [Gossypium raimondii]	cellular component: cell (GO:0005623);; cellular component: macromolecular complex (GO:0032991);; cellular component: organelle (GO:0043226);; cellular component: organelle part (GO:0044422);; cellular component: cell part (GO:0044464);; molecular function: binding (GO:0005488)
Gh_A01G247800	90	BLH9	0.765691	-0.130928	normal	0.150644	-0.522537	normal	1.3513e-05	-1.50823	down	7.30456e-05	-1.61736	down	0.014071	-0.908658	normal	4.66748e-05	-2.31433	down	7.92436e-08	-1.66515	down	0.286703	-0.341615	normal		0.0779488	-0.675609	normal	0.000212766	-1.44547	down	7.14041e-05	-2.4846	down	0.0358494	-0.831471	normal	0.176142	0.620978	normal	Molecular Function: DNA binding (GO:0003677);; Cellular Component: nucleus (GO:0005634);; Biological Process: regulation of transcription, DNA-templated (GO:0006355);;	--	--	Associated with HOX	BEL1-like homeodomain protein 9 OS=Arabidopsis thaliana OX=3702 GN=BLH9 PE=1 SV=1	PREDICTED: BEL1-like homeodomain protein 9 [Gossypium arboreum]	molecular function: binding (GO:0005488);; cellular component: cell (GO:0005623);; cellular component: organelle (GO:0043226);; cellular component: cell part (GO:0044464);; biological process: biological regulation (GO:0065007)
Gh_A01G249300	91	SPAC24B11.05	0.103389	0.419961	normal	1.14179e-06	1.09242	up	0.0310208	0.576885	normal	0.721832	0.116294	normal	1.07918e-20	1.75878	up	3.9318e-11	1.71285	up	1.71533e-07	0.760229	normal	0.00942788	0.699928	normal		0.785719	-0.161423	normal	1.41697e-08	1.18236	up	0.229051	0.435954	normal	0.903539	0.0268576	normal	0.185687	0.446569	normal	Molecular Function: hydrolase activity (GO:0016787);;	K07025|5.6e-172|ghi:107958006|K07025 putative hydrolase of the HAD superfamily | (RefSeq) suppressor of disruption of TFIIS-like	--	Haloacid dehalogenase-like hydrolase	--	PREDICTED: suppressor of disruption of TFIIS-like [Gossypium hirsutum]	molecular function: catalytic activity (GO:0003824)
Gh_A01G251300	92	RLP12	--	--	--	--	--	--	--	--	--	--	--	--	0.247968	0.429195	normal	0.628413	-0.308846	normal	0.678383	-0.164649	normal	0.748502	-0.13836	normal		0.47331	0.786348	normal	1.79711e-09	2.17195	up	0.214837	1.42752	normal	0.00275538	1.49028	up	2.26063e-06	3.02385	up	Cellular Component: integral component of membrane (GO:0016021);;	K13466|6.5e-13|ini:109193028|K13466 EIX receptor 1/2 | (RefSeq) receptor-like protein 12	Plant-pathogen interaction (ko04626)	Leucine rich repeat	Receptor-like protein 49 OS=Arabidopsis thaliana OX=3702 GN=RLP49 PE=2 SV=2	PREDICTED: receptor-like protein 12 [Gossypium hirsutum]	cellular component: membrane (GO:0016020);; cellular component: membrane part (GO:0044425)
Gh_A01G254400	93	RANBP1B	0.0166625	-0.795538	normal	1.27245e-08	-1.5242	down	2.7087e-06	-0.909909	normal	1.42192e-23	-2.35178	down	4.83022e-09	-1.02283	down	2.57915e-15	-1.49947	down	0.185568	-0.215293	normal	5.73383e-22	-1.60229	down		0.947854	0.0406829	normal	0.692355	-0.181706	normal	0.937453	0.0478338	normal	1.4071e-05	0.743759	normal	0.00241203	0.818129	normal	Biological Process: intracellular transport (GO:0046907);;	K20827|4.5e-73|dzi:111302816|K20827 RNA polymerase II-associated protein 2 [EC:3.1.3.16] | (RefSeq) putative RNA polymerase II subunit B1 CTD phosphatase RPAP2 homolog isoform X1	--	RanBP1 domain	Ran-binding protein 1 homolog b OS=Arabidopsis thaliana OX=3702 GN=RANBP1B PE=1 SV=2	PREDICTED: ran-binding protein 1 homolog b-like [Gossypium hirsutum]	biological process: localization (GO:0051179)
Gh_A01G256300	94	RLP12	--	--	--	--	--	--	0.00279697	1.54396	up	--	--	--	0.00178682	1.10775	up	0.55982	0.298235	normal	0.000138463	1.22542	up	0.997286	0.00170748	normal		--	--	--	3.35894e-16	3.86212	up	0.000591987	1.74205	up	5.74601e-08	1.46932	up	1.60202e-05	2.85811	up	Cellular Component: integral component of membrane (GO:0016021);;	K13466|5.7e-07|cit:102616085|K13466 EIX receptor 1/2 | (RefSeq) receptor-like protein EIX1	Plant-pathogen interaction (ko04626)	Leucine rich repeat	Receptor-like protein 53 OS=Arabidopsis thaliana OX=3702 GN=RLP53 PE=3 SV=1	hypothetical protein ES288_A01G261000v1 [Gossypium darwinii]	cellular component: membrane (GO:0016020);; cellular component: membrane part (GO:0044425)
Gh_A01G258800	95	SAG20	0.539168	-0.522654	normal	0.699689	0.25228	normal	--	--	--	1.39505e-06	-7.86982	down	4.86374e-07	-1.78418	down	5.82557e-05	-2.98073	down	1.06469e-15	-3.48257	down	2.19083e-08	-3.0161	down		0.0139812	1.03543	up	--	--	--	--	--	--	--	--	--	--	--	--	--	--	--	Wound-induced protein WI12	--	hypothetical protein ES319_A01G245700v1 [Gossypium barbadense]	--
Gh_A02G001400	96	At2g37230	--	--	--	0.499399	-0.52636	normal	0.0217912	1.29666	up	0.343804	-0.826304	normal	0.00257136	-1.21577	down	0.00638568	-1.08688	down	0.0013661	0.938282	normal	4.17407e-09	-2.63505	down		0.596991	0.702444	normal	--	--	--	0.864102	0.124682	normal	0.0623082	0.368566	normal	--	--	--	Molecular Function: molecular_function (GO:0003674);; Molecular Function: nucleic acid binding (GO:0003676);; Molecular Function: RNA binding (GO:0003723);; Molecular Function: mRNA binding (GO:0003729);; Molecular Function: catalytic activity (GO:0003824);; Molecular Function: nuclease activity (GO:0004518);; Molecular Function: endonuclease activity (GO:0004519);; Molecular Function: binding (G…	--	--	PPR repeat family	Pentatricopeptide repeat-containing protein At2g37230 OS=Arabidopsis thaliana OX=3702 GN=At2g37230 PE=2 SV=1	hypothetical protein ES319_A02G001300v1 [Gossypium barbadense]	molecular function: binding (GO:0005488);; molecular function: catalytic activity (GO:0003824);; biological process: metabolic process (GO:0008152);; biological process: cellular process (GO:0009987);; cellular component: cell (GO:0005623);; cellular component: cell part (GO:0044464);; biological process: response to stimulus (GO:0050896);; cellular component: organelle (GO:0043226);; cellular co…
Gh_A02G001700	97	RER3	0.343362	-0.30815	normal	0.124255	-0.405196	normal	0.248738	0.262085	normal	0.020772	-0.848961	normal	0.0538576	-0.707638	normal	0.00365672	-0.999818	normal	0.736276	0.103823	normal	0.000674334	-1.11707	down		0.106966	-0.665134	normal	0.00115691	-1.05642	down	1.12584e-05	-1.28185	down	5.58531e-05	-0.812768	normal	0.0349874	-0.902843	normal	Cellular Component: integral component of membrane (GO:0016021);;	--	--	Protein RETICULATA-related	Protein RETICULATA-RELATED 3, chloroplastic OS=Arabidopsis thaliana OX=3702 GN=RER3 PE=1 SV=1	PREDICTED: protein RETICULATA-RELATED 3, chloroplastic-like [Gossypium hirsutum]	cellular component: membrane (GO:0016020);; cellular component: membrane part (GO:0044425)
Gh_A02G003100	98	WRKY70	--	--	--	--	--	--	1.54622e-16	2.99752	up	6.27551e-22	3.89238	up	3.03551e-15	1.61237	up	0.402749	0.26811	normal	5.78945e-06	1.02483	up	0.0258743	0.615328	normal		1.1273e-14	3.07351	up	1.21574e-45	3.04518	up	0.00573369	1.70674	up	1.58813e-08	1.11244	up	0.573862	-0.175342	normal	Molecular Function: transcription factor activity, sequence-specific DNA binding (GO:0003700);; Cellular Component: nucleus (GO:0005634);; Molecular Function: sequence-specific DNA binding (GO:0043565);;	K13459|6.2e-17|bvg:104889681|K13459 disease resistance protein RPS2 | (RefSeq) disease resistance protein At4g27190	Plant-pathogen interaction (ko04626)	WRKY DNA -binding domain	Probable WRKY transcription factor 70 OS=Arabidopsis thaliana OX=3702 GN=WRKY70 PE=1 SV=1	hypothetical protein ES319_A02G003000v1 [Gossypium barbadense]	biological process: biological regulation (GO:0065007);; molecular function: nucleic acid binding transcription factor activity (GO:0001071);; cellular component: cell (GO:0005623);; cellular component: organelle (GO:0043226);; cellular component: cell part (GO:0044464);; molecular function: binding (GO:0005488)
Gh_A02G004500	99	OFP1	0.981076	-0.00793017	normal	1.38995e-05	-1.0387	down	0.913337	0.030931	normal	0.0179527	-0.628814	normal	1.39555e-05	0.864612	normal	6.0063e-07	-1.55024	down	0.585881	0.142841	normal	0.0445766	-0.522506	normal		0.396203	0.345043	normal	1.21371e-09	1.22244	up	0.768804	-0.188001	normal	0.0572681	0.465804	normal	0.150882	0.478406	normal	Molecular Function: DNA binding (GO:0003677);; Cellular Component: nucleus (GO:0005634);; Biological Process: negative regulation of transcription, DNA-templated (GO:0045892);;	--	--	Transcriptional repressor, ovate	Transcription repressor OFP1 OS=Arabidopsis thaliana OX=3702 GN=OFP1 PE=1 SV=1	hypothetical protein ES319_A02G004300v1 [Gossypium barbadense]	molecular function: binding (GO:0005488);; cellular component: cell (GO:0005623);; cellular component: organelle (GO:0043226);; cellular component: cell part (GO:0044464);; biological process: biological regulation (GO:0065007)
Gh_A02G005700	100	At3g08860	0.000854293	1.10344	up	9.54951e-05	1.54375	up	4.33976e-07	1.37114	up	3.28714e-10	2.20226	up	5.83536e-19	1.8056	up	0.972114	0.0158704	normal	0.000111332	0.512277	normal	4.46753e-22	2.06564	up	0.702153	0.869065	-0.14458	normal	0.0522903	0.558187	normal	0.0228638	-1.69025	down	1.24525e-13	-0.984756	normal	0.377721	-0.248909	normal	Molecular Function: transaminase activity (GO:0008483);; Molecular Function: pyridoxal phosphate binding (GO:0030170);;	K00827|8.5e-287|gab:108474449|K00827 alanine-glyoxylate transaminase / (R)-3-amino-2-methylpropionate-pyruvate transaminase [EC:2.6.1.44 2.6.1.40] | (RefSeq) alanine--glyoxylate aminotransferase 2 homolog 3, mitochondrial-like	Alanine, aspartate and glutamate metabolism (ko00250);; Glycine, serine and threonine metabolism (ko00260);; Cysteine and methionine metabolism (ko00270);; Valine, leucine and isoleucine degradation (ko00280)	Aminotransferase class-III	Alanine--glyoxylate aminotransferase 2 homolog 3, mitochondrial OS=Arabidopsis thaliana OX=3702 GN=At3g08860 PE=2 SV=1	PREDICTED: alanine--glyoxylate aminotransferase 2 homolog 3, mitochondrial-like [Gossypium hirsutum]	molecular function: catalytic activity (GO:0003824);; molecular function: binding (GO:0005488)
Gh_A02G006500	101	At1g60420	0.222101	0.573218	normal	0.00359714	0.871275	normal	1.06947e-09	1.4998	up	1.63352e-10	2.00083	up	0.00011849	1.03874	up	0.000406572	1.01455	up	1.00344e-09	1.48435	up	1.00701e-05	1.18447	up		0.736658	0.257122	normal	0.0568772	0.727629	normal	0.293386	0.37767	normal	0.253363	0.253928	normal	0.0599506	-0.532278	normal	--	--	--	C1 domain	--	PREDICTED: uncharacterized protein LOC107927421 [Gossypium hirsutum]	--
Gh_A02G007400	102	BIP103	0.707115	0.25823	normal	0.472961	0.442993	normal	0.0901391	-0.993702	normal	0.00179801	-2.3406	down	--	--	--	4.4417e-05	1.47503	up	0.582816	-0.266306	normal	0.337687	0.434773	normal		0.426394	-0.776783	normal	0.0402234	-1.20449	down	0.700667	0.235616	normal	0.939528	-0.0435099	normal	0.000634348	2.02181	up	--	--	--	--	--	hypothetical protein E1A91_A02G007800v1 [Gossypium mustelinum]	--
Gh_A02G010200	103	Gh_A02G010200	--	--	--	--	--	--	5.47244e-28	4.05282	up	3.43959e-09	3.11525	up	0.000423299	1.85981	up	--	--	--	2.80425e-12	3.05052	up	--	--	--		--	--	--	0.0283147	0.82345	normal	--	--	--	0.911094	-0.0301897	normal	0.000417838	-1.442	down	--	--	--	Agglutinin domain	--	PREDICTED: uncharacterized protein LOC107927406 [Gossypium hirsutum]	--
Gh_A02G010400	104	Gh_A02G010400	--	--	--	8.51588e-17	3.12468	up	--	--	--	--	--	--	0.00364019	1.6847	up	--	--	--	--	--	--	2.7368e-06	2.39148	up		--	--	--	0.814633	0.166277	normal	0.129868	-1.02169	normal	0.719251	0.25293	normal	3.06189e-07	3.18977	up	Molecular Function: potassium ion transmembrane transporter activity (GO:0015079);; Cellular Component: membrane (GO:0016020);;	--	--	Agglutinin domain	--	hypothetical protein GOBAR_AA33293 [Gossypium barbadense]	biological process: localization (GO:0051179);; molecular function: transporter activity (GO:0005215);; cellular component: membrane (GO:0016020)
Gh_A02G010900	105	BHLH153	0.0384379	-0.95789	normal	0.651959	0.191485	normal	0.969024	0.0145443	normal	0.000773848	-1.49843	down	0.00116729	-1.47357	down	0.868137	0.0638269	normal	0.223245	-0.360029	normal	0.00203513	-1.03329	down		0.530913	0.330069	normal	--	--	--	0.779246	0.184662	normal	0.932754	-0.0336422	normal	0.154163	0.822291	normal	Molecular Function: transcriptional activator activity, RNA polymerase II transcription regulatory region sequence-specific binding (GO:0001228);; Cellular Component: nucleus (GO:0005634);; Molecular Function: protein dimerization activity (GO:0046983);;	K05765|7.9e-13|gra:105781290|K05765 cofilin | (RefSeq) uncharacterized LOC105781290	--	--	Transcription factor bHLH153 OS=Arabidopsis thaliana OX=3702 GN=BHLH153 PE=1 SV=1	PREDICTED: transcription factor bHLH113-like isoform X1 [Gossypium hirsutum]	biological process: biological regulation (GO:0065007);; molecular function: nucleic acid binding transcription factor activity (GO:0001071);; cellular component: cell (GO:0005623);; cellular component: organelle (GO:0043226);; cellular component: cell part (GO:0044464);; molecular function: binding (GO:0005488)
Gh_A02G016200	106	BIG	--	--	--	0.000120002	1.76041	up	3.15842e-11	2.64035	up	9.31926e-08	2.81804	up	0.00932893	1.24112	up	0.000994633	1.4242	up	1.44269e-05	1.63619	up	0.000265502	1.45924	up		--	--	--	0.513959	0.363161	normal	0.133028	0.626454	normal	0.967197	-0.0138223	normal	0.361237	-0.353479	normal	Biological Process: intracellular signal transduction (GO:0035556);;	--	--	C1 domain	--	hypothetical protein ES288_A02G016300v1 [Gossypium darwinii]	biological process: cellular process (GO:0009987);; biological process: signaling (GO:0023052);; biological process: single-organism process (GO:0044699);; biological process: response to stimulus (GO:0050896);; biological process: biological regulation (GO:0065007)
Gh_A02G018800	107	GDI1	--	--	--	0.852753	0.228606	normal	0.678507	0.352122	normal	0.172705	-1.53745	normal	0.0133917	-1.07819	down	0.434203	-0.358144	normal	0.00188639	1.10886	up	1.683e-06	-2.20672	down		0.986598	0.0562842	normal	--	--	--	0.597691	-0.551784	normal	0.00442929	0.840842	normal	--	--	--	Molecular Function: Rho GDP-dissociation inhibitor activity (GO:0005094);; Cellular Component: cytoplasm (GO:0005737);;	K12462|5.8e-117|gab:108475475|K12462 Rho GDP-dissociation inhibitor | (RefSeq) rho GDP-dissociation inhibitor 1-like	--	RHO protein GDP dissociation inhibitor	Rho GDP-dissociation inhibitor 1 OS=Arabidopsis thaliana OX=3702 GN=GDI1 PE=1 SV=1	PREDICTED: rho GDP-dissociation inhibitor 1-like [Gossypium hirsutum]	biological process: biological regulation (GO:0065007);; molecular function: molecular function regulator (GO:0098772);; cellular component: cell (GO:0005623);; cellular component: cell part (GO:0044464)
Gh_A02G019100	108	Dctpp1	0.214576	0.62861	normal	0.99281	0.00651442	normal	--	--	--	0.112751	-1.06334	normal	0.0866442	-0.752525	normal	0.151544	-0.586323	normal	2.62729e-05	-1.61901	down	0.0123506	-0.980244	normal		0.912873	0.16662	normal	0.00195867	-1.20121	down	0.472687	-0.443192	normal	--	--	--	--	--	--	Biological Process: nucleoside triphosphate catabolic process (GO:0009143);; Molecular Function: metal ion binding (GO:0046872);; Molecular Function: nucleoside-triphosphate diphosphatase activity (GO:0047429);;	K16904|3.5e-73|gab:108475578|K16904 dCTP diphosphatase [EC:3.6.1.12] | (RefSeq) dCTP pyrophosphatase 1-like	Pyrimidine metabolism (ko00240)	MazG-like family	--	hypothetical protein ES319_A02G018400v1 [Gossypium barbadense]	biological process: metabolic process (GO:0008152);; biological process: cellular process (GO:0009987);; biological process: single-organism process (GO:0044699);; molecular function: binding (GO:0005488);; molecular function: catalytic activity (GO:0003824)
Gh_A02G031300	109	CHS1	0.803722	0.296771	normal	0.224707	0.669879	normal	0.430293	-0.521098	normal	4.31632e-09	-3.99959	down	0.00026291	1.23994	up	0.748185	-0.102296	normal	0.846167	0.0598248	normal	6.46208e-72	-5.06648	down		0.0508244	1.16772	normal	0.00931216	2.11279	up	0.46567	0.376267	normal	0.0197467	1.77045	up	0.870879	0.12266	normal	Biological Process: biosynthetic process (GO:0009058);; Molecular Function: transferase activity, transferring acyl groups other than amino-acyl groups (GO:0016747);;	K00660|9.1e-223|ghi:107957085|K00660 chalcone synthase [EC:2.3.1.74] | (RefSeq) chalcone synthase 1-like	Flavonoid biosynthesis (ko00941);; Circadian rhythm - plant (ko04712)	Chalcone and stilbene synthases, N-terminal domain	Chalcone synthase 1 OS=Camellia sinensis OX=4442 GN=CHS1 PE=2 SV=1	PREDICTED: chalcone synthase 1-like [Gossypium hirsutum]	biological process: metabolic process (GO:0008152);; molecular function: catalytic activity (GO:0003824)
Gh_A02G033300	110	Os03g0405500	0.696108	-0.359699	normal	0.931618	-0.0764647	normal	0.323467	0.691402	normal	--	--	--	0.0376156	0.760658	normal	0.617257	0.21706	normal	2.07377e-05	1.42533	up	0.000343222	-1.64493	down		0.903022	0.267929	normal	0.000127615	1.38439	up	0.118323	0.53933	normal	0.000964638	1.02575	up	--	--	--	Biological Process: intracellular signal transduction (GO:0035556);;	K15042|8.0e-44|gra:105761158|K15042 importin subunit alpha-6/7 | (RefSeq) uncharacterized LOC105761158	--	C1 domain	--	PREDICTED: uncharacterized protein LOC107957064 [Gossypium hirsutum]	biological process: cellular process (GO:0009987);; biological process: signaling (GO:0023052);; biological process: single-organism process (GO:0044699);; biological process: response to stimulus (GO:0050896);; biological process: biological regulation (GO:0065007)
Gh_A02G033500	111	Gh_A02G033500	0.90185	0.0843531	normal	3.32411e-07	2.39999	up	7.56324e-79	6.3139	up	1.40942e-86	7.41209	up	0.991325	-0.0139757	normal	0.00585979	2.56219	up	3.92764e-05	3.46838	up	4.45942e-10	5.19784	up		0.188994	1.52354	normal	2.71998e-05	1.43737	up	3.29701e-05	1.66262	up	1.42675e-12	-1.3114	down	0.00111144	-0.664515	normal	Molecular Function: glutathione transferase activity (GO:0004364);; Cellular Component: cytoplasm (GO:0005737);;	K00799|1.1e-127|ghi:107957063|K00799 glutathione S-transferase [EC:2.5.1.18] | (RefSeq) probable glutathione S-transferase	Glutathione metabolism (ko00480)	Glutathione S-transferase, N-terminal domain	Probable glutathione S-transferase OS=Nicotiana tabacum OX=4097 PE=2 SV=1	PREDICTED: probable glutathione S-transferase [Gossypium hirsutum]	molecular function: catalytic activity (GO:0003824);; cellular component: cell (GO:0005623);; cellular component: cell part (GO:0044464)
Gh_A02G035400	112	RNR2A	0.22839	-0.819086	normal	0.290538	-0.670167	normal	0.569174	0.332765	normal	0.6666	0.315696	normal	0.00119396	-1.52093	down	0.0551377	-0.845895	normal	0.000214659	1.1627	up	0.967401	0.018442	normal		0.987511	-0.037736	normal	--	--	--	0.704403	-0.232722	normal	0.00164809	0.807746	normal	0.44261	-0.300254	normal	Biological Process: deoxyribonucleotide biosynthetic process (GO:0009263);; Cellular Component: integral component of membrane (GO:0016021);; Molecular Function: oxidoreductase activity (GO:0016491);; Molecular Function: metal ion binding (GO:0046872);;	K10808|1.8e-198|gab:108474478|K10808 ribonucleoside-diphosphate reductase subunit M2 [EC:1.17.4.1] | (RefSeq) ribonucleoside-diphosphate reductase small chain A	Purine metabolism (ko00230);; Pyrimidine metabolism (ko00240);; Glutathione metabolism (ko00480)	Ribonucleotide reductase, small chain	Ribonucleoside-diphosphate reductase small chain A OS=Arabidopsis thaliana OX=3702 GN=RNR2A PE=1 SV=2	hypothetical protein ES319_A02G034100v1 [Gossypium barbadense]	biological process: metabolic process (GO:0008152);; biological process: cellular process (GO:0009987);; biological process: single-organism process (GO:0044699);; cellular component: membrane (GO:0016020);; cellular component: membrane part (GO:0044425);; molecular function: catalytic activity (GO:0003824);; molecular function: binding (GO:0005488)
Gh_A02G036800	113	slr0305	7.03851e-07	0.956953	normal	2.98186e-05	0.908154	normal	1.75129e-05	0.731048	normal	0.000540033	0.757549	normal	6.9165e-15	1.21946	up	4.23759e-11	1.06228	up	0.190324	0.232023	normal	1.05712e-08	0.998325	normal		0.919549	-0.0676736	normal	0.297143	0.199764	normal	0.848309	0.0659851	normal	0.000192136	-0.555736	normal	0.332544	0.201686	normal	Cellular Component: integral component of membrane (GO:0016021);;	K14638|1.0e-31|mng:MNEG_6196|K14638 solute carrier family 15 (peptide/histidine transporter), member 3/4 | (RefSeq) Peptide transporter PTR2	--	SNARE associated Golgi protein	--	hypothetical protein ES332_A02G037800v1 [Gossypium tomentosum]	cellular component: membrane (GO:0016020);; cellular component: membrane part (GO:0044425)
Gh_A02G037400	114	rsc5	--	--	--	--	--	--	--	--	--	--	--	--	0.0143433	-1.46927	down	2.48926e-05	-3.36497	down	0.000751468	-2.41757	down	0.00166597	-2.74522	down		0.994096	0.0201686	normal	--	--	--	--	--	--	--	--	--	--	--	--	--	--	--	CRAL/TRIO domain	--	hypothetical protein GOBAR_AA18469 [Gossypium barbadense]	--
Gh_A02G043900	115	cas2	0.970595	0.0175109	normal	0.0935645	-0.806772	normal	0.00217656	0.873151	normal	2.39373e-11	2.08347	up	0.271029	-0.498622	normal	0.138033	-0.580247	normal	0.0761166	0.525612	normal	2.16255e-16	1.84782	up		0.260308	-0.575655	normal	0.00559434	-1.08891	down	0.636133	-0.367817	normal	0.000148922	-0.909631	normal	0.000204142	-0.781754	normal	Biological Process: positive regulation of growth (GO:0045927);;	K18081|1.1e-49|bna:106425271|K18081 myotubularin-related protein 1/2 [EC:3.1.3.64 3.1.3.95] | (RefSeq) phosphatidylinositol-3-phosphatase myotubularin-2-like	Inositol phosphate metabolism (ko00562);; Phosphatidylinositol signaling system (ko04070)	Protein of unknown function (DUF668)	Protein PSK SIMULATOR 2 OS=Arabidopsis thaliana OX=3702 GN=PSI2 PE=2 SV=2	PREDICTED: uncharacterized protein LOC107944860 [Gossypium hirsutum]	biological process: biological regulation (GO:0065007)
Gh_A02G045600	116	PRP	0.216486	-2.05729	normal	0.228104	-1.8169	normal	0.31212	-1.30129	normal	0.263811	-1.91111	normal	8.72601e-05	-2.7157	down	0.000570812	-4.19324	down	3.52783e-05	-3.35802	down	0.0061787	-4.84771	down		0.791428	0.890569	normal	0.892162	0.225155	normal	0.433837	-1.50149	normal	0.170612	-1.12921	normal	0.444805	-2.00623	normal	Cellular Component: cell wall (GO:0005618);; Biological Process: seed trichome elongation (GO:0090378);;	--	--	--	--	proline-rich protein-1 [Gossypium hirsutum]	cellular component: cell (GO:0005623);; cellular component: cell part (GO:0044464);; biological process: reproduction (GO:0000003);; biological process: cellular process (GO:0009987);; biological process: reproductive process (GO:0022414);; biological process: multicellular organismal process (GO:0032501);; biological process: developmental process (GO:0032502);; biological process: growth (GO:00…
Gh_A02G047400	117	At4g14310	--	--	--	--	--	--	--	--	--	1.38805e-06	-9.22707	down	0.000136214	-4.49001	down	0.00530351	-5.52682	down	0.0390376	-3.59061	down	4.07015e-13	-9.65713	down		0.960219	0.158162	normal	--	--	--	--	--	--	--	--	--	--	--	--	Cellular Component: cellular_component (GO:0005575);; Cellular Component: cell wall (GO:0005618);; Cellular Component: cell (GO:0005623);; Cellular Component: external encapsulating structure (GO:0030312);; Cellular Component: cell part (GO:0044464);; Cellular Component: cell periphery (GO:0071944);;	--	--	--	KIN14B-interacting protein At4g14310 OS=Arabidopsis thaliana OX=3702 GN=At4g14310 PE=1 SV=1	hypothetical protein ES332_A02G049500v1 [Gossypium tomentosum]	cellular component: cell (GO:0005623);; cellular component: cell part (GO:0044464)
Gh_A02G049700	118	Gh_A02G049700	0.0569491	-0.542544	normal	0.574073	-0.193322	normal	4.75416e-08	-1.80056	down	2.01935e-12	-5.70264	down	5.92724e-12	-1.09372	down	3.57185e-05	-0.469862	normal	1.34943e-73	-2.11711	down	3.22473e-99	-2.39157	down		2.67491e-48	2.66832	up	3.50073e-24	2.12163	up	7.04069e-36	2.3721	up	1.94806e-23	2.36635	up	1.35822e-06	6.00396	up	Molecular Function: RNA binding (GO:0003723);; Molecular Function: mRNA binding (GO:0003729);; Cellular Component: nucleus (GO:0005634);; Biological Process: regulation of RNA metabolic process (GO:0051252);; Cellular Component: ribonucleoprotein complex (GO:1990904);;	K11294|1.2e-46|ppp:112289952|K11294 nucleolin | (RefSeq) 31 kDa ribonucleoprotein, chloroplastic-like	--	RNA recognition motif. (a.k.a. RRM, RBD, or RNP domain)	29 kDa ribonucleoprotein A, chloroplastic OS=Nicotiana sylvestris OX=4096 PE=2 SV=1	PREDICTED: 29 kDa ribonucleoprotein A, chloroplastic-like [Gossypium hirsutum]	molecular function: binding (GO:0005488);; cellular component: cell (GO:0005623);; cellular component: organelle (GO:0043226);; cellular component: cell part (GO:0044464);; biological process: biological regulation (GO:0065007);; cellular component: macromolecular complex (GO:0032991)
Gh_A02G052800	119	RUK	0.0870426	-4.9873	normal	0.189953	-3.1883	normal	0.0184549	-4.25336	down	0.000566452	-4.30737	down	0.000939253	-3.684	down	2.49622e-07	-7.6273	down	0.00154112	-3.66002	down	1.68087e-16	-10.6958	down		0.931507	0.355912	normal	--	--	--	--	--	--	--	--	--	--	--	--	Molecular Function: protein kinase activity (GO:0004672);; Molecular Function: ATP binding (GO:0005524);;	K17545|0.0e+00|ghi:107949166|K17545 serine/threonine-protein kinase ULK4 [EC:2.7.11.1] | (RefSeq) serine/threonine-protein kinase RUNKEL-like	--	Protein kinase domain	Serine/threonine-protein kinase RUNKEL OS=Arabidopsis thaliana OX=3702 GN=RUK PE=1 SV=1	hypothetical protein ES319_A02G050300v1 [Gossypium barbadense]	biological process: metabolic process (GO:0008152);; biological process: cellular process (GO:0009987);; molecular function: catalytic activity (GO:0003824);; molecular function: binding (GO:0005488)
Gh_A02G055900	120	RALFL33	0.000286289	-0.961734	normal	0.0037071	-0.827665	normal	2.69642e-33	-3.49315	down	2.68506e-13	-2.54408	down	8.22739e-18	-1.13227	down	1.82162e-31	-1.90351	down	3.14198e-76	-3.18419	down	6.23748e-14	-2.55874	down		0.591306	0.280777	normal	0.623626	0.118508	normal	0.00017415	-0.814896	normal	0.0281217	0.590691	normal	0.595116	0.290075	normal	Molecular Function: molecular_function (GO:0003674);; Molecular Function: receptor binding (GO:0005102);; Molecular Function: hormone activity (GO:0005179);; Molecular Function: binding (GO:0005488);; Molecular Function: protein binding (GO:0005515);; Cellular Component: cellular_component (GO:0005575);; Cellular Component: extracellular region (GO:0005576);; Cellular Component: cell wall (GO:000…	--	--	Rapid ALkalinization Factor (RALF)	Protein RALF-like 33 OS=Arabidopsis thaliana OX=3702 GN=RALFL33 PE=2 SV=1	hypothetical protein ES319_A02G052900v1 [Gossypium barbadense]	molecular function: binding (GO:0005488);; cellular component: extracellular region (GO:0005576);; cellular component: cell (GO:0005623);; cellular component: cell part (GO:0044464);; cellular component: cell junction (GO:0030054);; biological process: cellular process (GO:0009987);; biological process: biological regulation (GO:0065007);; biological process: signaling (GO:0023052);; biological p…
Gh_A02G057500	121	CAPH2	0.175634	-1.66268	normal	0.23847	-1.50747	normal	0.323752	-1.1317	normal	0.302783	-1.47966	normal	0.0255439	-1.00813	down	3.02037e-06	-2.31054	down	0.0335834	-0.89155	normal	2.9849e-05	-2.37963	down		0.982337	0.100025	normal	0.136836	0.751087	normal	--	--	--	0.383686	0.373148	normal	--	--	--	Cellular Component: condensed chromosome (GO:0000793);; Cellular Component: condensin complex (GO:0000796);; Molecular Function: chromatin binding (GO:0003682);; Cellular Component: nucleus (GO:0005634);; Biological Process: meiotic chromosome condensation (GO:0010032);; Biological Process: chromosome organization (GO:0051276);; Biological Process: mitotic sister chromatid separation (GO:0051306)…	K11490|0.0e+00|ghi:107933193|K11490 condensin-2 complex subunit H2 | (RefSeq) condensin-2 complex subunit H2-like	--	Condensin II complex subunit CAP-H2 or CNDH2, C-term	Condensin-2 complex subunit H2 OS=Arabidopsis thaliana OX=3702 GN=CAPH2 PE=2 SV=1	PREDICTED: condensin-2 complex subunit H2-like [Gossypium hirsutum]	cellular component: cell (GO:0005623);; cellular component: organelle (GO:0043226);; cellular component: cell part (GO:0044464);; cellular component: macromolecular complex (GO:0032991);; cellular component: organelle part (GO:0044422);; molecular function: binding (GO:0005488);; biological process: reproduction (GO:0000003);; biological process: cellular process (GO:0009987);; biological process…
Gh_A02G060200	122	COBL7	0.62529	-0.175654	normal	0.000883788	-1.07196	down	0.04226	-0.434162	normal	0.001001	-1.11021	down	1.77994e-08	-1.39066	down	9.05451e-17	-2.42364	down	4.34156e-08	-0.911757	normal	2.20868e-11	-1.8872	down		0.00140496	0.802627	normal	0.341915	-0.403332	normal	0.315864	-0.563603	normal	0.0387116	0.331558	normal	0.915971	0.0520294	normal	Biological Process: cellulose microfibril organization (GO:0010215);; Cellular Component: integral component of membrane (GO:0016021);; Cellular Component: anchored component of membrane (GO:0031225);;	K10956|4.9e-19|obr:102718200|K10956 protein transport protein SEC61 subunit alpha | (RefSeq) preprotein translocase subunit SECY, chloroplastic	Protein export (ko03060);; Protein processing in endoplasmic reticulum (ko04141);; Phagosome (ko04145)	COBRA-like protein	COBRA-like protein 7 OS=Arabidopsis thaliana OX=3702 GN=COBL7 PE=2 SV=2	PREDICTED: COBRA-like protein 7 [Gossypium hirsutum]	biological process: cellular process (GO:0009987);; biological process: single-organism process (GO:0044699);; biological process: cellular component organization or biogenesis (GO:0071840);; cellular component: membrane (GO:0016020);; cellular component: membrane part (GO:0044425)
Gh_A02G060600	123	AAE7	0.504241	-0.347485	normal	0.226302	-0.612192	normal	0.47713	0.294958	normal	0.00983616	1.21609	up	0.0778299	0.520194	normal	0.0348528	-0.740155	normal	0.993349	0.00340875	normal	9.50254e-07	1.15757	up		0.774892	0.288374	normal	4.79119e-05	1.15828	up	0.854459	0.139407	normal	0.968922	0.0150629	normal	0.345961	0.262293	normal	Molecular Function: ligase activity (GO:0016874);;	K01913|0.0e+00|ghi:107933241|K01913 acetate/butyrate---CoA ligase [EC:6.2.1.1 6.2.1.2] | (RefSeq) acetate/butyrate--CoA ligase AAE7, peroxisomal-like	Glycolysis / Gluconeogenesis (ko00010);; Pyruvate metabolism (ko00620);; Glyoxylate and dicarboxylate metabolism (ko00630);; Butanoate metabolism (ko00650);; Carbon metabolism (ko01200)	AMP-binding enzyme	Acetate/butyrate--CoA ligase AAE7, peroxisomal OS=Arabidopsis thaliana OX=3702 GN=AAE7 PE=1 SV=1	PREDICTED: acetate/butyrate--CoA ligase AAE7, peroxisomal-like [Gossypium hirsutum]	molecular function: catalytic activity (GO:0003824)
Gh_A02G064700	124	GALT3	--	--	--	0.356092	0.647663	normal	0.265633	0.689748	normal	--	--	--	0.252784	-0.409131	normal	0.303327	-0.333928	normal	0.148738	0.396393	normal	1.10994e-13	-2.78869	down		0.449452	0.828468	normal	0.00183004	1.23923	up	0.747751	-0.174653	normal	0.0372128	0.558457	normal	--	--	--	Cellular Component: Golgi apparatus (GO:0005794);; Biological Process: protein glycosylation (GO:0006486);; Cellular Component: integral component of membrane (GO:0016021);; Molecular Function: transferase activity, transferring glycosyl groups (GO:0016757);; Molecular Function: carbohydrate binding (GO:0030246);;	K20843|4.6e-258|ghi:107951591|K20843 hydroxyproline O-galactosyltransferase 2/3/4/5/6 [EC:2.4.1.-] | (RefSeq) hydroxyproline O-galactosyltransferase GALT3-like isoform X1	--	Galactoside-binding lectin	Hydroxyproline O-galactosyltransferase GALT3 OS=Arabidopsis thaliana OX=3702 GN=GALT3 PE=2 SV=1	PREDICTED: hydroxyproline O-galactosyltransferase GALT3-like isoform X1 [Gossypium hirsutum]	cellular component: cell (GO:0005623);; cellular component: organelle (GO:0043226);; cellular component: cell part (GO:0044464);; biological process: metabolic process (GO:0008152);; biological process: cellular process (GO:0009987);; biological process: single-organism process (GO:0044699);; cellular component: membrane (GO:0016020);; cellular component: membrane part (GO:0044425);; molecular fu…
Gh_A02G068100	125	FRS6	0.95779	-0.0130472	normal	0.628129	0.0912772	normal	0.194061	-0.258849	normal	2.29548e-09	-1.49579	down	1.00647e-12	9.32559	up	--	--	--	1.35764e-14	9.69809	up	6.06767e-16	10.069	up		2.80635e-18	-11.1193	down	2.16822e-13	-1.77509	down	0.00030174	-1.96907	down	5.06582e-07	-1.15743	down	0.126145	0.470685	normal	Molecular Function: zinc ion binding (GO:0008270);;	K17604|9.9e-148|zju:107411697|K17604 zinc finger SWIM domain-containing protein 3 | (RefSeq) uncharacterized protein LOC107411697 isoform X1	--	MuDR family transposase	--	PREDICTED: uncharacterized protein LOC108474504 [Gossypium arboreum]	molecular function: binding (GO:0005488)
Gh_A02G069000	126	UGT71A15	0.159926	0.505789	normal	0.9429	-0.0350099	normal	0.0108127	0.711809	normal	0.000167576	1.43397	up	3.48926e-11	8.81977	up	--	--	--	2.96713e-13	9.19709	up	4.1927e-15	9.78163	up		2.53813e-15	-10.4897	down	4.00126e-16	-2.1818	down	1.18391e-18	-7.46974	down	4.03089e-26	-1.99205	down	1.08733e-17	-2.11004	down	Molecular Function: UDP-glycosyltransferase activity (GO:0008194);;	K22950|4.0e-86|fve:101295404|K22950 acylphloroglucinol glucosyltransferase [EC:2.4.1.358] | (RefSeq) anthocyanidin 3-O-glucosyltransferase 2-like	--	UDP-glucoronosyl and UDP-glucosyl transferase	UDP-glycosyltransferase 71A15 OS=Malus domestica OX=3750 GN=UGT71A15 PE=1 SV=1	hypothetical protein ES332_A02G073000v1 [Gossypium tomentosum]	molecular function: catalytic activity (GO:0003824)
Gh_A02G070300	127	SN2	--	--	--	--	--	--	0.000226995	2.49138	up	0.000871	3.052	up	0.000875927	-1.27068	down	3.41287e-07	-2.49594	down	0.988048	-0.00605757	normal	0.00122216	-1.68171	down		0.0149156	2.26755	up	0.000149111	1.89781	up	--	--	--	0.383316	-0.211935	normal	1.68857e-05	-2.43162	down	--	--	--	Gibberellin regulated protein	--	PREDICTED: snakin-2-like [Gossypium hirsutum]	--
Gh_A02G074300	128	PER12	--	--	--	--	--	--	0.86818	0.0735681	normal	--	--	--	0.0222	0.832273	normal	0.0140794	-1.15052	down	0.890718	-0.0510024	normal	0.269052	-0.454748	normal		0.414072	0.566655	normal	9.74979e-08	2.01506	up	--	--	--	0.166562	0.455693	normal	--	--	--	Molecular Function: peroxidase activity (GO:0004601);; Cellular Component: extracellular region (GO:0005576);; Biological Process: response to oxidative stress (GO:0006979);; Molecular Function: heme binding (GO:0020037);; Biological Process: hydrogen peroxide catabolic process (GO:0042744);; Molecular Function: metal ion binding (GO:0046872);;	K00430|9.2e-187|gab:108487518|K00430 peroxidase [EC:1.11.1.7] | (RefSeq) peroxidase 12	Phenylpropanoid biosynthesis (ko00940)	Peroxidase	Peroxidase 12 OS=Arabidopsis thaliana OX=3702 GN=PER12 PE=1 SV=1	hypothetical protein ES319_A02G068600v1 [Gossypium barbadense]	biological process: metabolic process (GO:0008152);; biological process: cellular process (GO:0009987);; biological process: single-organism process (GO:0044699);; biological process: response to stimulus (GO:0050896);; biological process: detoxification (GO:0098754);; molecular function: catalytic activity (GO:0003824);; molecular function: antioxidant activity (GO:0016209);; cellular component:…
Gh_A02G080300	129	FLS2	--	--	--	6.2074e-07	3.06679	up	0.00202543	2.09611	up	1.06901e-05	3.24252	up	4.85118e-08	1.82762	up	0.000337813	1.35944	up	0.000275536	1.39346	up	2.04272e-19	2.95809	up		--	--	--	5.96257e-07	1.90397	up	0.784684	0.171895	normal	0.000383622	1.20812	up	5.74289e-09	1.64069	up	Cellular Component: integral component of membrane (GO:0016021);; Molecular Function: kinase activity (GO:0016301);;	--	--	Leucine rich repeat	--	PREDICTED: leucine-rich repeat receptor-like protein kinase PXL1 isoform X1 [Gossypium hirsutum]	cellular component: membrane (GO:0016020);; cellular component: membrane part (GO:0044425);; molecular function: catalytic activity (GO:0003824)
Gh_A02G080800	130	ndhA	0.910847	0.0756831	normal	0.401775	-0.546556	normal	--	--	--	0.190657	-0.932047	normal	--	--	--	0.13314	-0.911931	normal	--	--	--	--	--	--		0.856703	0.340661	normal	0.00959042	-1.31314	down	--	--	--	--	--	--	--	--	--	Cellular Component: plasma membrane (GO:0005886);; Cellular Component: integral component of membrane (GO:0016021);; Biological Process: oxidation-reduction process (GO:0055114);;	K05572|7.6e-192|gab:11540320|K05572 NAD(P)H-quinone oxidoreductase subunit 1 [EC:7.1.1.2] | (RefSeq) ndhA, GoarCp071; NADH dehydrogenase subunit 1	Oxidative phosphorylation (ko00190)	NADH dehydrogenase	NAD(P)H-quinone oxidoreductase subunit 1, chloroplastic OS=Gossypium hirsutum OX=3635 GN=ndhA PE=3 SV=1	NADH dehydrogenase subunit 1 [Gossypium australe]	cellular component: cell (GO:0005623);; cellular component: membrane (GO:0016020);; cellular component: cell part (GO:0044464);; cellular component: membrane part (GO:0044425);; biological process: metabolic process (GO:0008152);; biological process: single-organism process (GO:0044699)
Gh_A02G081100	131	GSO1	--	--	--	--	--	--	2.10614e-11	8.90751	up	1.36147e-15	10.4527	up	3.75586e-09	2.45777	up	0.0139199	1.21182	up	7.99377e-06	1.94229	up	2.90615e-38	3.82886	up		--	--	--	0.117346	2.9651	normal	0.340297	0.63072	normal	0.781384	0.130666	normal	0.0704558	0.490213	normal	Cellular Component: integral component of membrane (GO:0016021);;	--	--	Leucine rich repeat	--	hypothetical protein E1A91_D02G091000v1 [Gossypium mustelinum]	cellular component: membrane (GO:0016020);; cellular component: membrane part (GO:0044425)
Gh_A02G083300	132	WAK2	--	--	--	0.249067	0.647054	normal	1.55898e-47	3.61673	up	5.98485e-100	5.97391	up	0.0704834	0.972429	normal	0.753351	0.218269	normal	0.00294617	2.15782	up	4.40245e-09	2.78387	up		0.297018	1.13388	normal	1.09302e-09	2.28613	up	0.301093	0.684267	normal	0.195407	-0.3171	normal	3.80114e-21	-2.03077	down	Molecular Function: protein serine/threonine kinase activity (GO:0004674);; Molecular Function: calcium ion binding (GO:0005509);; Molecular Function: ATP binding (GO:0005524);; Cellular Component: plasma membrane (GO:0005886);; Biological Process: protein phosphorylation (GO:0006468);; Biological Process: cell surface receptor signaling pathway (GO:0007166);; Cellular Component: integral compone…	K23544|1.4e-110|brp:103842861|K23544 serine incorporator 1/3 | (RefSeq) serine incorporator 3	--	Protein kinase domain	Wall-associated receptor kinase 2 OS=Arabidopsis thaliana OX=3702 GN=WAK2 PE=1 SV=1	PREDICTED: putative wall-associated receptor kinase-like 16 [Gossypium hirsutum]	biological process: metabolic process (GO:0008152);; biological process: cellular process (GO:0009987);; molecular function: catalytic activity (GO:0003824);; molecular function: binding (GO:0005488);; cellular component: cell (GO:0005623);; cellular component: membrane (GO:0016020);; cellular component: cell part (GO:0044464);; biological process: signaling (GO:0023052);; biological process: sin…
Gh_A02G088700	133	At1g18250	--	--	--	--	--	--	--	--	--	--	--	--	0.000872549	1.4709	up	--	--	--	--	--	--	--	--	--		--	--	--	0.0504006	0.940772	normal	--	--	--	--	--	--	--	--	--	Cellular Component: integral component of membrane (GO:0016021);;	K12173|3.6e-35|gmx:100794341|K12173 BRCA1-A complex subunit BRE | (RefSeq) BRISC and BRCA1-A complex member 2	Homologous recombination (ko03440)	Thaumatin family	Pathogenesis-related thaumatin-like protein 3.5 OS=Cryptomeria japonica OX=3369 PE=1 SV=1	hypothetical protein ES319_A02G080100v1 [Gossypium barbadense]	cellular component: membrane (GO:0016020);; cellular component: membrane part (GO:0044425)
Gh_A02G091500	134	EXO	0.637756	-0.286266	normal	0.714963	0.106826	normal	0.988258	-0.00765965	normal	1.24527e-35	-4.98479	down	2.87605e-87	-2.88785	down	1.9264e-16	-2.77898	down	1.36764e-37	-2.71963	down	1.10454e-29	-2.47917	down		1.01377e-35	1.98147	up	0.257783	-0.616704	normal	0.065756	-0.919612	normal	0.300487	-0.718394	normal	2.67187e-22	4.51113	up	Biological Process: response to hypoxia (GO:0001666);; Cellular Component: cellular_component (GO:0005575);; Cellular Component: cell wall (GO:0005618);; Cellular Component: intracellular (GO:0005622);; Cellular Component: cell (GO:0005623);; Cellular Component: cytoplasm (GO:0005737);; Cellular Component: Golgi apparatus (GO:0005794);; Biological Process: response to stress (GO:0006950);; Biolog…	K00020|2.7e-24|mtr:MTR_8g088900|K00020 3-hydroxyisobutyrate dehydrogenase [EC:1.1.1.31] | (RefSeq) 6-phosphogluconate dehydrogenase-like protein	Valine, leucine and isoleucine degradation (ko00280)	Phosphate-induced protein 1 conserved region	Protein PHOSPHATE-INDUCED 1 OS=Nicotiana tabacum OX=4097 GN=PHI-1 PE=2 SV=1	hypothetical protein B456_005G094300 [Gossypium raimondii]	biological process: response to stimulus (GO:0050896);; cellular component: cell (GO:0005623);; cellular component: cell part (GO:0044464);; cellular component: organelle (GO:0043226);; biological process: growth (GO:0040007)
Gh_A02G091600	135	EXO	--	--	--	--	--	--	--	--	--	0.0636438	-1.50797	normal	1.58249e-19	-4.1728	down	1.91059e-06	-2.60668	down	2.55583e-17	-3.65279	down	6.62265e-09	-3.86367	down		0.393902	0.800818	normal	--	--	--	--	--	--	--	--	--	--	--	--	--	K00020|1.5e-21|mtr:MTR_8g088900|K00020 3-hydroxyisobutyrate dehydrogenase [EC:1.1.1.31] | (RefSeq) 6-phosphogluconate dehydrogenase-like protein	Valine, leucine and isoleucine degradation (ko00280)	Phosphate-induced protein 1 conserved region	Protein PHOSPHATE-INDUCED 1 OS=Nicotiana tabacum OX=4097 GN=PHI-1 PE=2 SV=1	hypothetical protein ES319_A02G083100v1 [Gossypium barbadense]	--
Gh_A02G094400	136	AHL17	0.0147047	-0.792398	normal	0.17872	0.401286	normal	0.153967	0.381738	normal	0.50154	0.227174	normal	0.000129058	-1.05915	down	0.816584	0.0769206	normal	0.0113858	0.561348	normal	0.192048	-0.352641	normal		0.939216	0.0757197	normal	0.714403	-0.183901	normal	0.524262	-0.267831	normal	0.168971	0.262153	normal	0.0864398	-0.47843	normal	Molecular Function: AT DNA binding (GO:0003680);; Molecular Function: transcription factor activity, sequence-specific DNA binding (GO:0003700);; Cellular Component: nucleus (GO:0005634);;	--	--	Plants and Prokaryotes Conserved (PCC) domain	AT-hook motif nuclear-localized protein 17 OS=Arabidopsis thaliana OX=3702 GN=AHL17 PE=2 SV=1	PREDICTED: AT-hook motif nuclear-localized protein 17-like [Gossypium hirsutum]	molecular function: binding (GO:0005488);; biological process: biological regulation (GO:0065007);; molecular function: nucleic acid binding transcription factor activity (GO:0001071);; cellular component: cell (GO:0005623);; cellular component: organelle (GO:0043226);; cellular component: cell part (GO:0044464)
Gh_A02G094700	137	HLJ1	0.718054	-0.240371	normal	0.714297	-0.292848	normal	0.908133	-0.0673153	normal	0.60777	-0.335476	normal	0.756186	0.151414	normal	0.0492854	0.594191	normal	0.370984	0.279275	normal	0.158147	-0.518733	normal		0.327516	0.681871	normal	0.0303064	1.08148	up	0.00442039	1.54465	up	0.00220303	1.02319	up	0.339257	0.516443	normal	Molecular Function: ATPase activator activity (GO:0001671);; Molecular Function: molecular_function (GO:0003674);; Cellular Component: cellular_component (GO:0005575);; Cellular Component: intracellular (GO:0005622);; Cellular Component: cell (GO:0005623);; Cellular Component: cytoplasm (GO:0005737);; Cellular Component: endoplasmic reticulum (GO:0005783);; Cellular Component: endoplasmic reticul…	K04506|5.1e-12|csat:104734106|K04506 E3 ubiquitin-protein ligase SIAH1 [EC:2.3.2.27] | (RefSeq) E3 ubiquitin-protein ligase SINA-like 7	Ubiquitin mediated proteolysis (ko04120)	DnaJ domain	--	PREDICTED: uncharacterized protein LOC107951123 [Gossypium hirsutum]	biological process: biological regulation (GO:0065007);; molecular function: molecular function regulator (GO:0098772);; cellular component: cell (GO:0005623);; cellular component: cell part (GO:0044464);; cellular component: organelle (GO:0043226);; cellular component: membrane (GO:0016020);; cellular component: organelle part (GO:0044422);; cellular component: membrane part (GO:0044425);; biolo…
Gh_A02G096400	138	GRF1	--	--	--	--	--	--	0.594365	0.337832	normal	0.0919692	1.19556	normal	9.02507e-06	-2.19641	down	0.0621776	-1.90229	normal	0.644989	-0.185284	normal	0.203812	-0.563463	normal		0.366124	0.879413	normal	--	--	--	--	--	--	0.349943	0.373603	normal	0.0942103	-0.844007	normal	Molecular Function: ATP binding (GO:0005524);; Cellular Component: nucleus (GO:0005634);; Biological Process: transcription, DNA-templated (GO:0006351);; Biological Process: regulation of transcription, DNA-templated (GO:0006355);; Biological Process: developmental process (GO:0032502);;	K22382|1.4e-11|oeu:111408549|K22382 WD repeat-containing protein 26 | (RefSeq) WD repeat-containing protein 26 homolog	--	WRC	Growth-regulating factor 6 OS=Oryza sativa subsp. japonica OX=39947 GN=GRF6 PE=2 SV=2	PREDICTED: growth-regulating factor 1-like isoform X1 [Gossypium hirsutum]	molecular function: binding (GO:0005488);; cellular component: cell (GO:0005623);; cellular component: organelle (GO:0043226);; cellular component: cell part (GO:0044464);; biological process: metabolic process (GO:0008152);; biological process: cellular process (GO:0009987);; biological process: biological regulation (GO:0065007);; biological process: developmental process (GO:0032502)
Gh_A02G098300	139	CYTB5-E	0.080297	0.705087	normal	0.136667	0.34768	normal	0.00254288	-1.33514	down	2.74709e-52	-7.9232	down	3.89934e-11	0.992808	normal	0.661729	0.0976164	normal	1.09274e-05	-0.831619	normal	9.95402e-21	-3.06261	down		8.84467e-05	0.937292	normal	0.0200141	1.22962	up	0.00266463	0.665573	normal	0.0159588	1.45515	up	5.27221e-18	5.8252	up	Molecular Function: heme binding (GO:0020037);; Molecular Function: metal ion binding (GO:0046872);;	K23490|3.5e-12|vra:106775697|K23490 cytochrome b5 | (RefSeq) cytochrome b5	--	Cytochrome b5-like Heme/Steroid binding domain	Cytochrome b5 OS=Brassica oleracea var. botrytis OX=3715 GN=CYB5 PE=1 SV=1	PREDICTED: cytochrome b5-like [Gossypium hirsutum]	molecular function: binding (GO:0005488)
Gh_A02G098400	140	VEP1	0.616636	-0.293271	normal	7.3115e-05	-2.14772	down	0.0207165	-3.38876	down	1.38665e-05	-4.47271	down	0.0201372	0.870719	normal	--	--	--	--	--	--	--	--	--		0.971852	0.0553212	normal	0.00482816	1.2255	up	--	--	--	--	--	--	--	--	--	--	K22419|2.8e-216|gra:105797302|K22419 Delta4-3-oxosteroid 5beta-reductase [EC:1.3.1.3] | (RefSeq) 3-oxo-Delta(4,5)-steroid 5-beta-reductase-like	--	--	3-oxo-Delta(4,5)-steroid 5-beta-reductase OS=Arabidopsis thaliana OX=3702 GN=VEP1 PE=1 SV=1	hypothetical protein GOBAR_AA12858 [Gossypium barbadense]	--
Gh_A02G101100	141	PATL4	--	--	--	--	--	--	--	--	--	1.36874e-06	-9.64312	down	0.00561193	-2.80029	down	8.0516e-14	-9.89203	down	0.0136597	-5.36039	down	0.000242522	-6.34881	down		0.989957	0.0492913	normal	--	--	--	--	--	--	--	--	--	--	--	--	Cellular Component: cellular_component (GO:0005575);; Cellular Component: intracellular (GO:0005622);; Cellular Component: cell (GO:0005623);; Cellular Component: nucleus (GO:0005634);; Cellular Component: cytoplasm (GO:0005737);; Cellular Component: cytosol (GO:0005829);; Cellular Component: plasma membrane (GO:0005886);; Cellular Component: membrane (GO:0016020);; Cellular Component: organelle …	K19996|4.0e-114|atr:18449038|K19996 phosphatidylinositol transfer protein SFH5 | (RefSeq) patellin-3	--	CRAL/TRIO domain	Patellin-4 OS=Arabidopsis thaliana OX=3702 GN=PATL4 PE=1 SV=2	hypothetical protein ES332_A02G103600v1 [Gossypium tomentosum]	cellular component: cell (GO:0005623);; cellular component: cell part (GO:0044464);; cellular component: organelle (GO:0043226);; cellular component: membrane (GO:0016020)
Gh_A02G103700	142	CML42	--	--	--	--	--	--	0.284947	-0.489101	normal	4.19437e-05	1.74273	up	0.768203	-0.144135	normal	0.0225822	-0.931659	normal	0.00284032	-1.18503	down	0.168778	0.500888	normal		0.503516	0.551136	normal	0.000125254	1.66992	up	--	--	--	0.775619	-0.138763	normal	0.0398299	-0.667645	normal	Molecular Function: calcium ion binding (GO:0005509);;	K13448|8.2e-100|ghi:107951355|K13448 calcium-binding protein CML | (RefSeq) probable calcium-binding protein CML43	Plant-pathogen interaction (ko04626)	EF hand	Calcium-binding protein CML42 OS=Arabidopsis thaliana OX=3702 GN=CML42 PE=1 SV=1	PREDICTED: probable calcium-binding protein CML43 [Gossypium hirsutum]	molecular function: binding (GO:0005488)
Gh_A02G107900	143	PIX13	0.395722	0.472633	normal	0.072493	0.527204	normal	3.51379e-11	1.61431	up	4.03677e-22	2.5234	up	0.0283827	0.674061	normal	0.00687366	0.885785	normal	0.325196	0.325142	normal	1.04212e-07	1.59336	up		0.0786034	0.966425	normal	0.00286776	1.17649	up	2.05809e-10	1.30725	up	0.0651245	-0.315123	normal	0.723666	0.0615322	normal	Molecular Function: protein serine/threonine kinase activity (GO:0004674);; Molecular Function: ATP binding (GO:0005524);;	K00924|2.5e-98|csat:104716570|K00924 kinase [EC:2.7.1.-] | (RefSeq) probable serine/threonine-protein kinase Cx32, chloroplastic	--	Protein kinase domain	Probable serine/threonine-protein kinase PIX13 OS=Arabidopsis thaliana OX=3702 GN=PIX13 PE=1 SV=2	PREDICTED: probable serine/threonine-protein kinase NAK isoform X1 [Gossypium hirsutum]	biological process: metabolic process (GO:0008152);; biological process: cellular process (GO:0009987);; molecular function: catalytic activity (GO:0003824);; molecular function: binding (GO:0005488)
Gh_A02G114100	144	Gh_A02G114100	0.749968	-0.217178	normal	0.601144	-0.336281	normal	1.49282e-05	2.09431	up	0.00254789	1.88839	up	0.167928	0.439702	normal	0.326503	-0.392211	normal	0.010381	0.752215	normal	3.61718e-11	1.97635	up		0.573342	0.644687	normal	6.98922e-11	1.31766	up	0.144592	0.573587	normal	0.000249404	-0.694643	normal	0.00106182	0.755574	normal	--	--	--	--	--	PREDICTED: uncharacterized protein LOC107951311 isoform X1 [Gossypium hirsutum]	--
Gh_A02G124200	145	atad1a	--	--	--	--	--	--	3.13298e-07	2.67706	up	2.55746e-25	5.06125	up	5.38937e-05	2.118	up	--	--	--	--	--	--	5.66198e-30	4.13545	up		--	--	--	0.925881	0.073711	normal	--	--	--	2.3107e-15	-2.96664	down	1.70916e-08	-1.47557	down	Molecular Function: ATP binding (GO:0005524);;	K03231|1.3e-122|mtr:MTR_1g101870|K03231 elongation factor 1-alpha | (RefSeq) elongation factor 1-alpha	RNA transport (ko03013)	ATPase family associated with various cellular activities (AAA)	ATPase family AAA domain-containing protein FIGL1 OS=Arabidopsis thaliana OX=3702 GN=FIGL1 PE=2 SV=2	hypothetical protein ES319_A02G112600v1 [Gossypium barbadense]	molecular function: binding (GO:0005488)
Gh_A02G125900	146	ACS1	0.279402	0.47457	normal	6.79951e-06	-1.49732	down	0.275138	-0.335273	normal	0.0628511	-0.694248	normal	3.22839e-06	-0.924493	normal	4.06275e-26	-2.3461	down	2.10368e-17	-1.53888	down	2.4827e-08	-1.11588	down		0.846278	0.167218	normal	4.45123e-05	-1.22309	down	0.0327678	-0.700203	normal	4.47187e-14	-1.03476	down	0.268796	-0.231087	normal	Molecular Function: catalytic activity (GO:0003824);; Biological Process: biosynthetic process (GO:0009058);; Molecular Function: pyridoxal phosphate binding (GO:0030170);;	K20772|2.3e-284|ghi:107952122|K20772 1-aminocyclopropane-1-carboxylate synthase 1/2/6 [EC:4.4.1.14] | (RefSeq) 1-aminocyclopropane-1-carboxylate synthase-like	Cysteine and methionine metabolism (ko00270);; MAPK signaling pathway - plant (ko04016)	Aminotransferase class I and II	1-aminocyclopropane-1-carboxylate synthase OS=Glycine max OX=3847 GN=ACS1 PE=2 SV=1	PREDICTED: 1-aminocyclopropane-1-carboxylate synthase-like [Gossypium hirsutum]	molecular function: catalytic activity (GO:0003824);; biological process: metabolic process (GO:0008152);; molecular function: binding (GO:0005488)
Gh_A02G129700	147	TSO1	--	--	--	--	--	--	0.0115518	-1.82592	down	0.000207532	-3.69841	down	6.73084e-06	-2.26988	down	1.9179e-07	-3.19031	down	0.00193652	-1.19577	down	1.57733e-11	-3.56141	down		0.802272	0.453892	normal	--	--	--	--	--	--	0.00876105	1.10252	up	--	--	--	--	--	--	Tesmin/TSO1-like CXC domain, cysteine-rich domain	Protein tesmin/TSO1-like CXC 2 OS=Arabidopsis thaliana OX=3702 GN=TCX2 PE=1 SV=1	PREDICTED: protein tesmin/TSO1-like CXC 2 isoform X1 [Gossypium hirsutum]	--
Gh_A02G131000	148	CYCA1-1	0.0673188	-3.54264	normal	0.0397612	-3.79983	down	0.00251014	-6.18785	down	1.22012e-07	-9.72737	down	7.2828e-05	-4.9409	down	0.000288696	-6.42747	down	0.0808357	-4.45276	normal	3.5608e-14	-10.1229	down		0.968676	0.124966	normal	--	--	--	--	--	--	--	--	--	--	--	--	Biological Process: regulation of cyclin-dependent protein serine/threonine kinase activity (GO:0000079);; Cellular Component: cyclin-dependent protein kinase holoenzyme complex (GO:0000307);; Cellular Component: nucleus (GO:0005634);; Cellular Component: cytoplasm (GO:0005737);; Molecular Function: cyclin-dependent protein serine/threonine kinase regulator activity (GO:0016538);; Cellular Compon…	K06627|6.5e-250|ghi:107951959|K06627 cyclin-A | (RefSeq) cyclin-A1-1-like	--	Cyclin, N-terminal domain	Cyclin-A1-1 OS=Arabidopsis thaliana OX=3702 GN=CYCA1-1 PE=1 SV=1	PREDICTED: cyclin-A1-1-like [Gossypium hirsutum]	biological process: biological regulation (GO:0065007);; cellular component: cell (GO:0005623);; cellular component: macromolecular complex (GO:0032991);; cellular component: cell part (GO:0044464);; cellular component: organelle (GO:0043226);; molecular function: molecular function regulator (GO:0098772);; cellular component: other organism (GO:0044215);; cellular component: other organism part …
Gh_A02G133700	149	Gh_A02G133700	--	--	--	--	--	--	--	--	--	--	--	--	0.845023	0.105613	normal	0.269091	-0.502792	normal	0.162017	-0.580993	normal	0.207189	-0.860639	normal		--	--	--	0.0211072	1.17975	up	--	--	--	0.00136169	1.73987	up	--	--	--	--	--	--	--	--	PREDICTED: uncharacterized protein LOC107890149 [Gossypium hirsutum]	--
Gh_A02G138700	150	FAS1	--	--	--	--	--	--	--	--	--	--	--	--	0.00385577	-3.17102	down	6.0873e-12	-9.53076	down	6.61729e-10	-3.75702	down	1.85572e-08	-3.62963	down		0.946224	0.382182	normal	--	--	--	--	--	--	--	--	--	--	--	--	Biological Process: mitotic cell cycle (GO:0000278);; Biological Process: double-strand break repair via homologous recombination (GO:0000724);; Biological Process: recombinational repair (GO:0000725);; Molecular Function: molecular_function (GO:0003674);; Molecular Function: binding (GO:0005488);; Molecular Function: protein binding (GO:0005515);; Cellular Component: cellular_component (GO:00055…	K10750|0.0e+00|gab:108462077|K10750 chromatin assembly factor 1 subunit A | (RefSeq) chromatin assembly factor 1 subunit FAS1-like	--	Chromatin assembly factor 1 subunit A	Chromatin assembly factor 1 subunit FAS1 OS=Arabidopsis thaliana OX=3702 GN=FAS1 PE=1 SV=1	hypothetical protein ES319_A02G124400v1 [Gossypium barbadense]	biological process: cellular process (GO:0009987);; biological process: single-organism process (GO:0044699);; biological process: metabolic process (GO:0008152);; biological process: response to stimulus (GO:0050896);; molecular function: binding (GO:0005488);; cellular component: cell (GO:0005623);; cellular component: cell part (GO:0044464);; cellular component: organelle (GO:0043226);; biolog…
Gh_A02G146000	151	TIP2-1	0.0590373	-0.693569	normal	7.05681e-06	-1.26305	down	1.24658e-66	-4.54364	down	3.06518e-68	-6.19211	down	1.83732e-16	-1.1208	down	4.95727e-24	-1.93747	down	6.50978e-96	-3.53972	down	5.83424e-05	-2.09126	down		0.503499	0.356615	normal	0.883473	-0.0618217	normal	0.246591	-0.335829	normal	3.47265e-17	1.36206	up	1.1867e-11	4.47944	up	Molecular Function: water channel activity (GO:0015250);; Cellular Component: integral component of membrane (GO:0016021);;	K09873|3.1e-120|ghi:107951644|K09873 aquaporin TIP | (RefSeq) aquaporin TIP2-1-like	--	Major intrinsic protein	Aquaporin TIP2-1 OS=Arabidopsis thaliana OX=3702 GN=TIP2-1 PE=1 SV=2	aquaporin TIP2-1-like [Gossypium hirsutum]	biological process: single-organism process (GO:0044699);; biological process: localization (GO:0051179);; molecular function: transporter activity (GO:0005215);; cellular component: membrane (GO:0016020);; cellular component: membrane part (GO:0044425)
Gh_A02G162300	152	Gh_A02G162300	0.00861291	-1.11063	down	7.71455e-10	-2.84135	down	0.00400425	0.847382	normal	0.00569474	0.88422	normal	3.8383e-07	-1.72107	down	1.14472e-11	-2.65661	down	0.00274729	-0.777146	normal	1.72342e-05	-1.64641	down	-0.610437	0.00332183	0.856205	normal	--	--	--	--	--	--	0.00763985	-0.757	normal	0.000993749	-1.64726	down	Molecular Function: copper ion binding (GO:0005507);; Cellular Component: extracellular region (GO:0005576);; Molecular Function: oxidoreductase activity (GO:0016491);;	K00423|4.9e-180|tcc:18590851|K00423 L-ascorbate oxidase [EC:1.10.3.3] | (RefSeq) L-ascorbate oxidase	Ascorbate and aldarate metabolism (ko00053)	Multicopper oxidase	L-ascorbate oxidase OS=Cucumis sativus OX=3659 PE=1 SV=1	PREDICTED: L-ascorbate oxidase-like [Gossypium hirsutum]	molecular function: binding (GO:0005488);; cellular component: extracellular region (GO:0005576);; molecular function: catalytic activity (GO:0003824)
Gh_A02G164400	153	lptD	0.129823	-0.642984	normal	0.219848	-0.350548	normal	3.03636e-16	-2.35677	down	8.15885e-10	-2.37229	down	6.34439e-32	-1.92954	down	1.08684e-16	-1.83373	down	9.96447e-37	-2.52247	down	4.66887e-31	-1.94374	down		0.00737515	0.843042	normal	0.297407	-0.435288	normal	0.0159196	-0.657716	normal	0.012162	0.681784	normal	9.05227e-06	1.2952	up	--	--	--	--	--	hypothetical protein ES288_A02G163800v1 [Gossypium darwinii]	--
Gh_A02G164800	154	WRKY51	--	--	--	2.6942e-22	3.28694	up	5.28777e-20	3.35655	up	6.8385e-49	5.46413	up	2.05652e-21	3.40368	up	1.14662e-08	3.01672	up	2.36684e-06	2.35568	up	3.59192e-13	3.06618	up		--	--	--	1.62359e-14	2.82545	up	0.198926	0.681539	normal	0.962966	-0.0196538	normal	1.14498e-08	-1.39878	down	Molecular Function: transcription factor activity, sequence-specific DNA binding (GO:0003700);; Cellular Component: nucleus (GO:0005634);; Molecular Function: sequence-specific DNA binding (GO:0043565);;	K18835|6.1e-24|lang:109338445|K18835 WRKY transcription factor 2 | (RefSeq) WRKY transcription factor SUSIBA2-like	Plant-pathogen interaction (ko04626)	WRKY DNA -binding domain	Probable WRKY transcription factor 51 OS=Arabidopsis thaliana OX=3702 GN=WRKY51 PE=1 SV=1	PREDICTED: probable WRKY transcription factor 51 [Gossypium hirsutum]	biological process: biological regulation (GO:0065007);; molecular function: nucleic acid binding transcription factor activity (GO:0001071);; cellular component: cell (GO:0005623);; cellular component: organelle (GO:0043226);; cellular component: cell part (GO:0044464);; molecular function: binding (GO:0005488)
Gh_A02G166400	155	RNR1	--	--	--	0.33169	-2.42987	normal	--	--	--	5.82603e-05	-10.3862	down	0.000303205	-3.42197	down	1.32173e-07	-6.48413	down	8.25105e-08	-3.76376	down	5.17524e-15	-11.4648	down		0.826958	0.804162	normal	--	--	--	--	--	--	--	--	--	--	--	--	Molecular Function: ribonucleoside-diphosphate reductase activity, thioredoxin disulfide as acceptor (GO:0004748);; Molecular Function: ATP binding (GO:0005524);; Biological Process: DNA replication (GO:0006260);;	K10807|0.0e+00|gab:108461317|K10807 ribonucleoside-diphosphate reductase subunit M1 [EC:1.17.4.1] | (RefSeq) ribonucleoside-diphosphate reductase large subunit-like	Purine metabolism (ko00230);; Pyrimidine metabolism (ko00240);; Glutathione metabolism (ko00480)	Ribonucleotide reductase, barrel domain	Ribonucleoside-diphosphate reductase large subunit OS=Arabidopsis thaliana OX=3702 GN=RNR1 PE=1 SV=1	PREDICTED: ribonucleoside-diphosphate reductase large subunit-like [Gossypium hirsutum]	biological process: metabolic process (GO:0008152);; biological process: single-organism process (GO:0044699);; molecular function: catalytic activity (GO:0003824);; molecular function: binding (GO:0005488);; biological process: cellular process (GO:0009987)
Gh_A02G167400	156	At5g64700	0.453742	0.279949	normal	5.90219e-08	-2.17886	down	6.41003e-10	-3.03638	down	0.176993	-0.640054	normal	7.02705e-05	-1.7139	down	2.46964e-08	-2.7104	down	5.14633e-19	-3.8164	down	0.000172826	-1.51981	down		0.933864	0.115743	normal	4.1211e-07	-1.87883	down	--	--	--	--	--	--	0.137072	-0.739555	normal	Cellular Component: plasma membrane (GO:0005886);; Cellular Component: integral component of membrane (GO:0016021);; Molecular Function: transmembrane transporter activity (GO:0022857);;	--	--	EamA-like transporter family	WAT1-related protein At5g64700 OS=Arabidopsis thaliana OX=3702 GN=At5g64700 PE=2 SV=1	PREDICTED: WAT1-related protein At5g64700-like isoform X2 [Gossypium hirsutum]	cellular component: cell (GO:0005623);; cellular component: membrane (GO:0016020);; cellular component: cell part (GO:0044464);; cellular component: membrane part (GO:0044425);; biological process: localization (GO:0051179);; molecular function: transporter activity (GO:0005215)
Gh_A02G168300	157	PPC2	--	--	--	--	--	--	--	--	--	--	--	--	2.0443e-10	8.62356	up	--	--	--	4.3998e-15	9.82588	up	3.32373e-16	10.1708	up		--	--	--	7.26025e-10	8.52082	up	--	--	--	3.88271e-15	9.97229	up	1.4091e-10	9.85618	up	Biological Process: tricarboxylic acid cycle (GO:0006099);; Molecular Function: phosphoenolpyruvate carboxylase activity (GO:0008964);; Biological Process: carbon fixation (GO:0015977);;	K01595|4.6e-165|ghi:107917731|K01595 phosphoenolpyruvate carboxylase [EC:4.1.1.31] | (RefSeq) phosphoenolpyruvate carboxylase-like	Pyruvate metabolism (ko00620);; Carbon fixation in photosynthetic organisms (ko00710);; Carbon metabolism (ko01200)	Phosphoenolpyruvate carboxylase	Phosphoenolpyruvate carboxylase 1 OS=Arabidopsis thaliana OX=3702 GN=PPC1 PE=1 SV=1	hypothetical protein ES332_A02G168600v1 [Gossypium tomentosum]	biological process: metabolic process (GO:0008152);; biological process: cellular process (GO:0009987);; biological process: single-organism process (GO:0044699);; molecular function: catalytic activity (GO:0003824)
Gh_A02G170000	158	Gh_A02G170000	0.50656	-0.393113	normal	0.101886	-0.560253	normal	6.05229e-05	-1.94034	down	4.53866e-30	-4.05386	down	0.000139639	0.677989	normal	1.32994e-05	-0.832756	normal	6.68483e-09	-1.47437	down	5.39541e-61	-4.14347	down		0.0324039	0.755075	normal	0.00743453	1.82893	up	0.156364	0.461422	normal	0.0936428	1.2381	normal	0.125516	0.691952	normal	Molecular Function: ligase activity (GO:0016874);;	K01904|0.0e+00|gab:108486424|K01904 4-coumarate--CoA ligase [EC:6.2.1.12] | (RefSeq) 4-coumarate--CoA ligase 2	Ubiquinone and other terpenoid-quinone biosynthesis (ko00130);; Phenylpropanoid biosynthesis (ko00940)	AMP-binding enzyme	4-coumarate--CoA ligase 2 OS=Glycine max OX=3847 PE=2 SV=2	PREDICTED: 4-coumarate--CoA ligase 2 [Gossypium arboreum]	molecular function: catalytic activity (GO:0003824)
Gh_A02G172100	159	Gh_A02G172100	0.117449	-1.31103	normal	0.373063	-0.646801	normal	0.623789	-0.319886	normal	0.00835554	1.79802	up	1.92348e-05	-1.84492	down	1.47887e-05	-1.98826	down	0.000347112	-1.47617	down	0.350182	-0.404126	normal		0.715174	0.543753	normal	--	--	--	--	--	--	0.117471	-0.586694	normal	6.84979e-09	-1.62493	down	Cellular Component: nucleosome (GO:0000786);; Molecular Function: DNA binding (GO:0003677);; Cellular Component: nucleus (GO:0005634);; Biological Process: nucleosome assembly (GO:0006334);; Biological Process: DNA-templated transcription, initiation (GO:0006352);; Cellular Component: host cell nucleus (GO:0042025);; Molecular Function: protein heterodimerization activity (GO:0046982);;	K11254|1.2e-49|ghi:107934611|K11254 histone H4 | (RefSeq) histone H4-like	--	Centromere kinetochore component CENP-T histone fold	Histone H4 variant TH011 OS=Triticum aestivum OX=4565 PE=3 SV=2	PREDICTED: histone H4-like [Gossypium hirsutum]	cellular component: cell (GO:0005623);; cellular component: macromolecular complex (GO:0032991);; cellular component: organelle (GO:0043226);; cellular component: organelle part (GO:0044422);; cellular component: cell part (GO:0044464);; molecular function: binding (GO:0005488);; biological process: cellular process (GO:0009987);; biological process: cellular component organization or biogenesis …
Gh_A02G179700	160	At3g49720	0.337577	-0.344539	normal	6.57346e-08	-1.0891	down	8.48215e-10	-1.21513	down	1.50508e-15	-1.98785	down	1.80456e-09	-1.07882	down	1.32418e-10	-1.71184	down	3.01858e-09	-1.11317	down	3.52605e-09	-1.52415	down		0.992165	-0.00739804	normal	0.0203999	-0.733979	normal	0.09066	-0.647865	normal	0.693473	0.102316	normal	0.236852	0.481911	normal	Cellular Component: integral component of membrane (GO:0016021);;	K23871|3.0e-145|ghi:107935264|K23871 putative pectin methylesterase [EC:2.1.1.-] | (RefSeq) uncharacterized protein At3g49720-like	--	--	Probable pectin methylesterase CGR2 OS=Arabidopsis thaliana OX=3702 GN=CGR2 PE=2 SV=1	hypothetical protein ES319_A02G162800v1 [Gossypium barbadense]	cellular component: membrane (GO:0016020);; cellular component: membrane part (GO:0044425)
Gh_A02G183500	161	PER73	--	--	--	--	--	--	--	--	--	--	--	--	0.0295292	-1.11654	down	0.193599	-2.25557	normal	0.25876	-0.592995	normal	0.00885516	-1.34755	down		0.0179637	1.81082	up	0.0291239	2.09004	up	--	--	--	9.92953e-07	2.83463	up	0.291663	0.614778	normal	Molecular Function: peroxidase activity (GO:0004601);; Cellular Component: extracellular region (GO:0005576);; Biological Process: response to oxidative stress (GO:0006979);; Molecular Function: heme binding (GO:0020037);; Biological Process: hydrogen peroxide catabolic process (GO:0042744);; Molecular Function: metal ion binding (GO:0046872);;	K00430|7.1e-184|gab:108467615|K00430 peroxidase [EC:1.11.1.7] | (RefSeq) peroxidase 73-like	Phenylpropanoid biosynthesis (ko00940)	Peroxidase	Peroxidase 51 OS=Arabidopsis thaliana OX=3702 GN=PER51 PE=2 SV=1	hypothetical protein ES319_A02G166700v1 [Gossypium barbadense]	biological process: metabolic process (GO:0008152);; biological process: cellular process (GO:0009987);; biological process: single-organism process (GO:0044699);; biological process: response to stimulus (GO:0050896);; biological process: detoxification (GO:0098754);; molecular function: catalytic activity (GO:0003824);; molecular function: antioxidant activity (GO:0016209);; cellular component:…
Gh_A02G183600	162	Gh_A02G183600	--	--	--	0.000427732	1.33139	up	0.124226	0.607547	normal	--	--	--	0.000994472	-2.50665	down	0.114591	-0.729119	normal	6.32493e-07	1.30734	up	1.2687e-06	-2.32912	down		0.740091	0.279601	normal	--	--	--	4.0872e-05	-1.80088	down	0.000261776	0.984385	normal	--	--	--	--	--	--	--	--	hypothetical protein ES319_1Z069600v1 [Gossypium barbadense]	--
Gh_A02G183700	163	At2g23090	0.4565	0.259111	normal	0.946288	0.0255207	normal	0.0418071	-0.643399	normal	0.449186	0.293912	normal	0.303038	-0.305975	normal	0.495553	-0.179826	normal	0.0188136	-0.503974	normal	0.643183	0.105865	normal		0.00959553	-0.914078	normal	6.5838e-10	-1.46931	down	7.64179e-08	-1.13816	down	0.000306499	-0.771256	normal	1.70737e-06	-1.07874	down	--	--	--	Zinc-binding	Uncharacterized protein At2g23090 OS=Arabidopsis thaliana OX=3702 GN=At2g23090 PE=1 SV=1	Chaperone DnaJ [Gossypium australe]	--
Gh_A02G184100	164	Ddb2	0.555495	0.376026	normal	0.00190781	1.4733	up	1.88193e-12	2.81878	up	0.0792915	1.11717	normal	7.39759e-09	1.3853	up	2.90235e-11	1.52948	up	2.28585e-61	3.37518	up	0.000611357	0.921648	normal		0.8372	0.292809	normal	1.97547e-08	1.30353	up	0.16808	0.328962	normal	1.3989e-06	0.868565	normal	0.69491	0.132997	normal	Cellular Component: ubiquitin ligase complex (GO:0000151);; Biological Process: protein polyubiquitination (GO:0000209);; Biological Process: nucleotide-excision repair, DNA damage recognition (GO:0000715);; Molecular Function: molecular_function (GO:0003674);; Molecular Function: nucleic acid binding (GO:0003676);; Molecular Function: DNA binding (GO:0003677);; Molecular Function: damaged DNA bi…	--	--	Anaphase-promoting complex subunit 4 WD40 domain	--	PREDICTED: uncharacterized protein LOC107931622 isoform X1 [Gossypium hirsutum]	cellular component: cell (GO:0005623);; cellular component: macromolecular complex (GO:0032991);; cellular component: cell part (GO:0044464);; biological process: metabolic process (GO:0008152);; biological process: cellular process (GO:0009987);; biological process: cellular component organization or biogenesis (GO:0071840);; molecular function: binding (GO:0005488);; cellular component: organel…
Gh_A02G185300	165	EB1C	--	--	--	--	--	--	--	--	--	0.000679996	-5.67031	down	9.74407e-08	-2.87702	down	2.04e-13	-9.78802	down	0.00289512	-4.53524	down	3.772e-14	-7.05567	down		0.872121	0.46826	normal	--	--	--	--	--	--	--	--	--	--	--	--	Cellular Component: microtubule (GO:0005874);; Molecular Function: microtubule binding (GO:0008017);;	K10436|2.8e-180|gab:108463924|K10436 microtubule-associated protein, RP/EB family | (RefSeq) microtubule-associated protein RP/EB family member 1C	--	EB1-like C-terminal motif	Microtubule-associated protein RP/EB family member 1C OS=Arabidopsis thaliana OX=3702 GN=EB1C PE=1 SV=1	PREDICTED: microtubule-associated protein RP/EB family member 1C [Gossypium arboreum]	cellular component: cell (GO:0005623);; cellular component: organelle (GO:0043226);; cellular component: organelle part (GO:0044422);; cellular component: cell part (GO:0044464);; cellular component: supramolecular complex (GO:0099080);; molecular function: binding (GO:0005488)
Gh_A02G189300	166	nodH	--	--	--	--	--	--	0.0611358	0.759602	normal	0.122455	-1.04066	normal	0.00978216	-1.12965	down	0.000311487	-1.64232	down	0.741303	0.132305	normal	0.00174263	-1.28836	down		0.991214	-0.019323	normal	--	--	--	--	--	--	0.0700243	-0.629296	normal	--	--	--	Molecular Function: sulfotransferase activity (GO:0008146);; Cellular Component: integral component of membrane (GO:0016021);;	--	--	Sulfotransferase domain	--	PREDICTED: nodulation protein H-like [Gossypium hirsutum]	molecular function: catalytic activity (GO:0003824);; cellular component: membrane (GO:0016020);; cellular component: membrane part (GO:0044425)
Gh_A02G190200	167	PLP3	--	--	--	--	--	--	--	--	--	--	--	--	0.205404	0.708655	normal	--	--	--	1.21991e-13	2.456	up	--	--	--		--	--	--	0.012519	1.66013	up	--	--	--	5.59175e-27	3.35839	up	--	--	--	Biological Process: lipid catabolic process (GO:0016042);; Molecular Function: hydrolase activity (GO:0016787);;	--	--	Patatin-like phospholipase	Patatin-like protein 3 OS=Arabidopsis thaliana OX=3702 GN=PLP3 PE=2 SV=2	hypothetical protein ES332_A02G193800v1 [Gossypium tomentosum]	biological process: metabolic process (GO:0008152);; biological process: single-organism process (GO:0044699);; molecular function: catalytic activity (GO:0003824)
Gh_A02G194000	168	At2g18630	0.000132041	0.855631	normal	0.0170976	0.717487	normal	0.433193	-0.195337	normal	0.581054	0.238624	normal	3.51638e-11	1.10498	up	0.000295816	0.660882	normal	0.338403	0.204622	normal	6.67285e-07	0.80231	normal		0.0999707	0.519314	normal	5.40694e-06	0.775518	normal	0.154082	0.443265	normal	2.39247e-06	0.929011	normal	0.000248996	1.10897	up	Cellular Component: integral component of membrane (GO:0016021);;	--	--	Protein of unknown function (DUF677)	--	hypothetical protein ES332_A02G197800v1 [Gossypium tomentosum]	cellular component: membrane (GO:0016020);; cellular component: membrane part (GO:0044425)
Gh_A02G194400	169	At2g18630	0.723306	-0.277083	normal	0.539666	0.453795	normal	0.972942	-0.0154368	normal	0.313664	-1.05454	normal	0.00810038	0.698656	normal	0.712008	0.145862	normal	0.000149872	1.07054	up	0.414255	-0.244972	normal		0.656553	0.338836	normal	0.0103016	1.31709	up	0.99156	0.0140754	normal	5.40029e-07	1.43257	up	0.177543	1.16889	normal	Cellular Component: integral component of membrane (GO:0016021);;	--	--	Protein of unknown function (DUF677)	UPF0496 protein At2g18630 OS=Arabidopsis thaliana OX=3702 GN=At2g18630 PE=2 SV=3	hypothetical protein E1A91_A02G182800v1 [Gossypium mustelinum]	cellular component: membrane (GO:0016020);; cellular component: membrane part (GO:0044425)
Gh_A02G195700	170	Grd	0.049727	0.846507	normal	0.730725	0.185878	normal	0.832857	-0.100974	normal	0.442792	0.462243	normal	0.754331	-0.124759	normal	0.373498	-0.346941	normal	0.654173	-0.126855	normal	0.211463	-0.395757	normal		0.903022	-0.166338	normal	5.9072e-05	-1.12469	down	0.0992103	-0.719233	normal	0.415682	-0.191305	normal	0.00833357	-1.0014	down	Cellular Component: integral component of membrane (GO:0016021);;	--	--	Protein of unknown function (DUF1195)	--	hypothetical protein ES319_A02G177900v1 [Gossypium barbadense]	cellular component: membrane (GO:0016020);; cellular component: membrane part (GO:0044425)
Gh_A02G202100	171	Gh_A02G202100	--	--	--	--	--	--	--	--	--	0.000640141	-3.94939	down	3.04954e-10	-2.8586	down	1.08094e-13	-9.79567	down	5.99099e-06	-5.15426	down	0.000403009	-6.01537	down		0.946224	0.207634	normal	--	--	--	--	--	--	--	--	--	--	--	--	--	--	--	--	--	PREDICTED: uncharacterized protein LOC107936542 isoform X1 [Gossypium hirsutum]	--
Gh_A02G205500	172	Gh_A02G205500	0.975281	0.0106177	normal	0.913607	0.036761	normal	0.223505	-0.340681	normal	0.0100872	-0.819919	normal	0.623669	-0.109133	normal	0.18958	0.242945	normal	0.00915761	0.428516	normal	0.0021446	0.522004	normal		0.00373302	-0.904495	normal	2.5629e-11	-1.01661	down	1.48972e-05	-0.719409	normal	0.442446	-0.130724	normal	0.00429188	0.460665	normal	Molecular Function: aconitate hydratase activity (GO:0003994);; Molecular Function: citrate dehydratase activity (GO:0047780);; Molecular Function: 4 iron, 4 sulfur cluster binding (GO:0051539);;	K01681|0.0e+00|gab:108456604|K01681 aconitate hydratase [EC:4.2.1.3] | (RefSeq) aconitate hydratase, cytoplasmic-like isoform X1	Citrate cycle (TCA cycle) (ko00020);; Glyoxylate and dicarboxylate metabolism (ko00630);; Carbon metabolism (ko01200);; 2-Oxocarboxylic acid metabolism (ko01210);; Biosynthesis of amino acids (ko01230)	Aconitase family (aconitate hydratase)	Aconitate hydratase, cytoplasmic OS=Cucurbita maxima OX=3661 PE=2 SV=1	hypothetical protein GOBAR_AA36439 [Gossypium barbadense]	molecular function: catalytic activity (GO:0003824);; molecular function: binding (GO:0005488)
Gh_A03G004100	173	ABCB2	0.000164	-0.912596	normal	0.00111318	-0.766885	normal	1.63238e-08	-1.25586	down	2.75404e-42	-5.94936	down	5.55602e-05	0.394623	normal	0.00784939	-0.812995	normal	8.71795e-09	-0.899089	normal	6.66079e-16	-2.25964	down		0.988509	0.0119058	normal	9.78643e-22	1.32198	up	0.939637	-0.0530983	normal	0.0620606	0.381738	normal	2.16259e-13	3.72682	up	Molecular Function: ATP binding (GO:0005524);; Cellular Component: integral component of membrane (GO:0016021);; Molecular Function: ATPase activity (GO:0016887);; Molecular Function: ATPase activity, coupled to transmembrane movement of substances (GO:0042626);; Biological Process: transmembrane transport (GO:0055085);;	K05658|0.0e+00|ghi:107942025|K05658 ATP-binding cassette, subfamily B (MDR/TAP), member 1 [EC:7.6.2.2] | (RefSeq) ABC transporter B family member 2-like	ABC transporters (ko02010)	ABC transporter transmembrane region	ABC transporter B family member 2 OS=Arabidopsis thaliana OX=3702 GN=ABCB2 PE=1 SV=3	ABC transporter B family member 2-like [Gossypium hirsutum]	molecular function: binding (GO:0005488);; cellular component: membrane (GO:0016020);; cellular component: membrane part (GO:0044425);; molecular function: catalytic activity (GO:0003824);; biological process: localization (GO:0051179);; molecular function: transporter activity (GO:0005215)
Gh_A03G005200	174	Gh_A03G005200	0.220703	-0.891686	normal	0.115329	-1.06634	normal	3.44602e-05	-2.54575	down	2.25419e-05	-3.90365	down	3.45705e-12	-2.55471	down	1.54041e-21	-4.17114	down	4.26469e-19	-3.61825	down	3.28612e-23	-4.57384	down		0.13823	1.30644	normal	0.622095	-0.345553	normal	0.000833077	-1.81158	down	0.670276	0.237221	normal	--	--	--	--	--	--	--	--	hypothetical protein E1A91_A03G005800v1 [Gossypium mustelinum]	--
Gh_A03G009500	175	EXLB1	3.7925e-08	11.4898	up	7.84731e-15	12.322	up	1.6534e-16	10.5253	up	--	--	--	2.94184e-17	12.1263	up	1.79205e-15	10.1723	up	3.20066e-15	10.0567	up	--	--	--	0.63652	--	--	--	0.79636	0.486188	normal	0.00451967	-2.32371	down	0.106459	-0.613861	normal	--	--	--	Cellular Component: extracellular region (GO:0005576);;	K20628|2.2e-28|cmo:103495519|K20628 expansin | (RefSeq) expansin-B3-like	--	Expansin C-terminal domain	Expansin-like B1 OS=Arabidopsis thaliana OX=3702 GN=EXLB1 PE=2 SV=2	PREDICTED: expansin-like B1 [Gossypium hirsutum]	cellular component: extracellular region (GO:0005576)
Gh_A03G009800	176	SEOB	0.264617	2.46486	normal	0.0298824	4.28871	up	0.0788623	3.28485	normal	--	--	--	1.87177e-85	4.5724	up	5.16113e-09	3.1531	up	1.87821e-40	3.66652	up	0.522203	-0.472852	normal		0.879513	0.643804	normal	1.06736e-27	2.74269	up	0.712222	-0.508013	normal	3.97381e-05	1.07134	up	0.00119815	4.45772	up	Biological Process: phloem development (GO:0010088);;	--	--	Sieve element occlusion N-terminus	Protein SIEVE ELEMENT OCCLUSION B OS=Arabidopsis thaliana OX=3702 GN=SEOB PE=1 SV=1	PREDICTED: protein SIEVE ELEMENT OCCLUSION B-like isoform X2 [Gossypium hirsutum]	biological process: developmental process (GO:0032502)
Gh_A03G012200	177	ATL21A	0.0944615	0.724121	normal	--	--	--	--	--	--	--	--	--	0.00186901	1.0817	up	0.896641	0.0615833	normal	0.967096	-0.0188406	normal	0.492613	-0.405884	normal		0.954385	0.0781396	normal	0.318055	0.442324	normal	--	--	--	0.648124	0.210122	normal	--	--	--	Cellular Component: integral component of membrane (GO:0016021);;	--	--	Wall-associated receptor kinase galacturonan-binding	--	PREDICTED: putative RING-H2 finger protein ATL21A [Gossypium hirsutum]	cellular component: membrane (GO:0016020);; cellular component: membrane part (GO:0044425)
Gh_A03G015200	178	NPF6.3	0.0836845	1.88172	normal	0.00473008	2.59906	up	0.0070749	2.29782	up	5.27858e-06	4.54589	up	2.97213e-08	1.71771	up	0.000264753	1.37514	up	2.93951e-10	2.30814	up	7.44549e-18	2.94156	up		0.69681	0.832597	normal	0.328767	0.691058	normal	0.571141	-0.399553	normal	0.0122128	0.844591	normal	0.0415534	-0.748104	normal	Biological Process: oligopeptide transport (GO:0006857);; Cellular Component: integral component of membrane (GO:0016021);; Molecular Function: transmembrane transporter activity (GO:0022857);;	K14638|3.3e-144|smo:SELMODRAFT_97812|K14638 solute carrier family 15 (peptide/histidine transporter), member 3/4 | (RefSeq) hypothetical protein	--	POT family	Protein NRT1/ PTR FAMILY 6.3 OS=Arabidopsis thaliana OX=3702 GN=NPF6.3 PE=1 SV=1	hypothetical protein ES319_A03G015000v1 [Gossypium barbadense]	biological process: localization (GO:0051179);; cellular component: membrane (GO:0016020);; cellular component: membrane part (GO:0044425);; molecular function: transporter activity (GO:0005215)
Gh_A03G017000	179	VAS	0.0814847	0.784859	normal	0.589911	-0.289572	normal	0.00316172	-1.37798	down	0.767167	-0.186291	normal	0.000549775	-1.12168	down	0.208389	-0.624297	normal	0.0821458	-0.691027	normal	0.292831	-0.329103	normal		0.571527	0.482354	normal	9.06457e-06	-1.41403	down	0.896411	0.131243	normal	0.00438183	1.17414	up	0.377149	0.364665	normal	--	--	--	Probable lipid transfer	--	hypothetical protein ES319_A03G017100v1 [Gossypium barbadense]	--
Gh_A03G021700	180	SGR1	--	--	--	0.123439	2.05058	normal	0.00121461	4.84612	up	0.000950372	6.58051	up	1.97117e-05	1.61139	up	--	--	--	1.33406e-09	2.25156	up	7.48026e-72	4.12994	up		--	--	--	0.832022	0.211412	normal	0.178702	-1.03218	normal	4.62392e-18	-2.11692	down	1.08376e-32	-1.96736	down	Cellular Component: cellular_component (GO:0005575);; Cellular Component: intracellular (GO:0005622);; Cellular Component: cell (GO:0005623);; Cellular Component: cytoplasm (GO:0005737);; Cellular Component: chloroplast (GO:0009507);; Cellular Component: plastid envelope (GO:0009526);; Cellular Component: plastid stroma (GO:0009532);; Cellular Component: plastid (GO:0009536);; Cellular Component:…	K22013|7.3e-166|gab:108482352|K22013 magnesium dechelatase [EC:4.99.1.10] | (RefSeq) protein STAY-GREEN 1, chloroplastic-like	Porphyrin and chlorophyll metabolism (ko00860)	Staygreen protein	Protein STAY-GREEN homolog, chloroplastic OS=Capsicum annuum OX=4072 GN=SGR PE=1 SV=2	PREDICTED: protein STAY-GREEN 1, chloroplastic-like [Gossypium hirsutum]	cellular component: cell (GO:0005623);; cellular component: cell part (GO:0044464);; cellular component: organelle (GO:0043226);; cellular component: organelle part (GO:0044422);; cellular component: membrane (GO:0016020)
Gh_A03G024000	181	RGA1	0.550514	0.315192	normal	0.0562447	0.854684	normal	0.203519	0.589293	normal	0.257153	0.651222	normal	0.0010089	1.0791	up	2.79179e-07	1.44923	up	6.93477e-08	1.43036	up	4.90669e-06	1.289	up		0.672823	0.368333	normal	0.00152143	1.14074	up	0.00755339	0.941843	normal	2.03483e-05	1.2093	up	0.00656072	1.02922	up	Biological Process: defense response (GO:0006952);; Molecular Function: ADP binding (GO:0043531);;	K15078|2.6e-121|tcc:18614561|K15078 structure-specific endonuclease subunit SLX1 [EC:3.6.1.-] | (RefSeq) putative disease resistance protein RGA3	--	NB-ARC domain	Putative disease resistance protein RGA3 OS=Solanum bulbocastanum OX=147425 GN=RGA3 PE=2 SV=2	PREDICTED: putative disease resistance protein RGA3 [Gossypium hirsutum]	biological process: response to stimulus (GO:0050896);; molecular function: binding (GO:0005488)
Gh_A03G025800	182	BAP2	--	--	--	--	--	--	--	--	--	--	--	--	0.000120508	1.80338	up	0.045779	1.10348	up	0.0389169	1.15347	up	--	--	--		--	--	--	5.52847e-10	2.57652	up	1.58966e-06	2.65842	up	7.92453e-06	2.28615	up	0.0536513	1.11678	normal	--	--	--	C2 domain	--	PREDICTED: BON1-associated protein 2-like isoform X1 [Gossypium hirsutum]	--
Gh_A03G026300	183	BAM7	0.945613	-0.0188383	normal	0.543028	0.16698	normal	1.14957e-12	-1.15125	down	3.82353e-11	-1.35307	down	2.04612e-06	-1.15135	down	5.96374e-05	-1.45857	down	7.40287e-09	-1.06147	down	3.15187e-07	-1.12067	down		0.000460171	-0.665154	normal	5.93879e-14	-1.79276	down	9.25716e-10	-2.30872	down	0.00264591	-0.565989	normal	0.187626	-0.404842	normal	Biological Process: polysaccharide catabolic process (GO:0000272);; Molecular Function: beta-amylase activity (GO:0016161);; Molecular Function: amylopectin maltohydrolase activity (GO:0102229);;	K01177|4.8e-254|ghi:107933027|K01177 beta-amylase [EC:3.2.1.2] | (RefSeq) beta-amylase 2, chloroplastic-like isoform X1	Starch and sucrose metabolism (ko00500)	Glycosyl hydrolase family 14	Beta-amylase 2, chloroplastic OS=Arabidopsis thaliana OX=3702 GN=BAM2 PE=1 SV=2	PREDICTED: beta-amylase 2, chloroplastic-like isoform X1 [Gossypium hirsutum]	biological process: metabolic process (GO:0008152);; molecular function: catalytic activity (GO:0003824)
Gh_A03G027200	184	Gh_A03G027200	0.292842	-0.417475	normal	1.77862e-08	1.55491	up	2.80087e-66	3.12297	up	2.76896e-11	2.10111	up	0.00286752	-1.00442	down	8.33354e-07	1.16773	up	1.88458e-122	3.39729	up	3.99248e-05	0.973633	normal		0.842826	-0.145744	normal	0.108202	-0.726591	normal	0.0754625	-0.551348	normal	0.321462	0.136782	normal	3.25336e-06	-1.24548	down	Biological Process: microtubule cytoskeleton organization (GO:0000226);; Biological Process: mitotic cell cycle (GO:0000278);; Molecular Function: GTPase activity (GO:0003924);; Molecular Function: structural constituent of cytoskeleton (GO:0005200);; Molecular Function: GTP binding (GO:0005525);; Cellular Component: cytoplasm (GO:0005737);; Cellular Component: microtubule (GO:0005874);; Biologic…	K07375|3.0e-262|ghi:107963775|K07375 tubulin beta | (RefSeq) tubulin beta-7 chain	Phagosome (ko04145)	Tubulin/FtsZ family, GTPase domain	Tubulin beta-7 chain OS=Gossypium hirsutum OX=3635 PE=2 SV=1	PREDICTED: tubulin beta-7 chain [Gossypium hirsutum]	biological process: cellular process (GO:0009987);; biological process: cellular component organization or biogenesis (GO:0071840);; biological process: single-organism process (GO:0044699);; molecular function: catalytic activity (GO:0003824);; molecular function: structural molecule activity (GO:0005198);; molecular function: binding (GO:0005488);; cellular component: cell (GO:0005623);; cellul…
Gh_A03G027900	185	guaA	--	--	--	0.934713	0.0717712	normal	6.88194e-05	2.13764	up	0.000462842	2.51086	up	0.109232	-0.67248	normal	0.809967	-0.104273	normal	3.39253e-07	1.44599	up	0.690647	0.157713	normal		0.417462	0.943611	normal	0.00770476	1.13284	up	0.0429572	0.747236	normal	0.167731	0.275579	normal	1.14832e-06	-1.37299	down	Molecular Function: GMP synthase (glutamine-hydrolyzing) activity (GO:0003922);; Molecular Function: ATP binding (GO:0005524);; Biological Process: glutamine metabolic process (GO:0006541);; Molecular Function: pyrophosphatase activity (GO:0016462);;	K01951|0.0e+00|ghi:107963780|K01951 GMP synthase (glutamine-hydrolysing) [EC:6.3.5.2] | (RefSeq) GMP synthase [glutamine-hydrolyzing]-like	Purine metabolism (ko00230)	GMP synthase C terminal domain	--	PREDICTED: GMP synthase [glutamine-hydrolyzing]-like [Gossypium hirsutum]	molecular function: catalytic activity (GO:0003824);; molecular function: binding (GO:0005488);; biological process: metabolic process (GO:0008152);; biological process: cellular process (GO:0009987);; biological process: single-organism process (GO:0044699)
Gh_A03G028000	186	murE	0.102853	-1.09504	normal	0.250672	-0.7457	normal	0.516824	-0.341058	normal	3.63148e-05	-4.69691	down	0.0008172	-1.27779	down	4.72662e-09	-2.2155	down	0.0293785	-0.717486	normal	6.92458e-08	-3.78273	down		0.570318	0.561784	normal	0.633409	0.376404	normal	0.156085	-0.928931	normal	0.582403	0.204587	normal	--	--	--	Molecular Function: ATP binding (GO:0005524);; Cellular Component: cytoplasm (GO:0005737);; Biological Process: regulation of cell shape (GO:0008360);; Biological Process: biosynthetic process (GO:0009058);; Molecular Function: acid-amino acid ligase activity (GO:0016881);; Biological Process: cell division (GO:0051301);;	--	--	Mur ligase middle domain	UDP-N-acetylmuramoyl-L-alanyl-D-glutamate--2,6-diaminopimelate ligase MurE homolog, chloroplastic OS=Arabidopsis thaliana OX=3702 GN=MURE PE=1 SV=1	PREDICTED: UDP-N-acetylmuramoyl-L-alanyl-D-glutamate--2,6-diaminopimelate ligase-like [Gossypium hirsutum]	molecular function: binding (GO:0005488);; cellular component: cell (GO:0005623);; cellular component: cell part (GO:0044464);; biological process: biological regulation (GO:0065007);; biological process: metabolic process (GO:0008152);; molecular function: catalytic activity (GO:0003824);; biological process: cellular process (GO:0009987);; biological process: single-organism process (GO:0044699)
Gh_A03G033400	187	At5g57670	0.0394288	-0.738911	normal	0.000271372	-1.77281	down	2.36177e-11	-2.15858	down	1.20302e-06	-1.92107	down	2.14785e-19	-1.35162	down	2.52092e-21	-1.89637	down	6.01242e-65	-2.66961	down	1.51009e-32	-1.86421	down		0.753771	-0.239674	normal	0.000110338	-0.843744	normal	0.566832	-0.382928	normal	8.30295e-05	-0.748738	normal	0.43861	-0.160467	normal	Molecular Function: protein serine/threonine kinase activity (GO:0004674);; Molecular Function: ATP binding (GO:0005524);;	K01534|2.1e-142|var:108330779|K01534 Zn2+/Cd2+-exporting ATPase [EC:7.2.2.12 7.2.2.21] | (RefSeq) cadmium/zinc-transporting ATPase HMA3-like	--	Protein kinase domain	Probable receptor-like serine/threonine-protein kinase At5g57670 OS=Arabidopsis thaliana OX=3702 GN=At5g57670 PE=2 SV=1	hypothetical protein ES332_A03G034700v1 [Gossypium tomentosum]	biological process: metabolic process (GO:0008152);; biological process: cellular process (GO:0009987);; molecular function: catalytic activity (GO:0003824);; molecular function: binding (GO:0005488)
Gh_A03G035700	188	SCT	0.0556562	-0.731686	normal	0.788785	0.11321	normal	0.00120812	-1.53685	down	6.86797e-08	-3.28585	down	1.64491e-05	-1.72662	down	0.397202	0.354795	normal	0.00626094	-1.07554	down	3.55953e-07	-2.23884	down		0.942138	0.111188	normal	0.0316423	-0.873231	normal	0.440322	0.33472	normal	0.209573	0.577018	normal	--	--	--	Molecular Function: N-acyltransferase activity (GO:0016410);;	K20240|1.2e-269|ghi:107935053|K20240 spermidine dicoumaroyl transferase [EC:2.3.1.249] | (RefSeq) spermidine coumaroyl-CoA acyltransferase-like	--	Transferase family	Spermidine coumaroyl-CoA acyltransferase OS=Arabidopsis thaliana OX=3702 GN=SCT PE=1 SV=1	PREDICTED: spermidine coumaroyl-CoA acyltransferase-like [Gossypium hirsutum]	molecular function: catalytic activity (GO:0003824)
Gh_A03G043200	189	DDB_G0284757	0.08359	-1.21736	normal	0.121214	-1.10182	normal	0.544674	-0.44285	normal	0.065541	-2.87643	normal	0.607429	-0.21454	normal	0.287621	-0.770006	normal	0.933469	-0.0310334	normal	0.00243576	-1.09241	down		0.984038	0.05353	normal	0.00250888	1.05004	up	0.779119	0.367682	normal	0.214113	0.489571	normal	0.129912	1.87174	normal	--	--	--	--	OVARIAN TUMOR DOMAIN-containing deubiquitinating enzyme 9 OS=Arabidopsis thaliana OX=3702 GN=OTU9 PE=1 SV=1	PREDICTED: OTU domain-containing protein DDB_G0284757-like isoform X2 [Gossypium hirsutum]	--
Gh_A03G049000	190	ECA1	0.588164	-0.233633	normal	0.409168	0.297033	normal	0.0905572	0.545049	normal	8.33561e-10	-3.16158	down	4.60148e-06	0.743207	normal	0.908414	-0.0240587	normal	0.0452081	0.342728	normal	1.97429e-23	-2.40601	down		0.460517	0.411443	normal	2.36301e-12	1.39123	up	0.838772	0.0680796	normal	0.302765	0.224911	normal	0.0359947	1.19239	up	Molecular Function: ATP binding (GO:0005524);; Cellular Component: integral component of membrane (GO:0016021);;	K01537|0.0e+00|gab:108464226|K01537 P-type Ca2+ transporter type 2C [EC:7.2.2.10] | (RefSeq) calcium-transporting ATPase 1, endoplasmic reticulum-type-like	--	Cation transporting ATPase, C-terminus	Calcium-transporting ATPase 1, endoplasmic reticulum-type OS=Arabidopsis thaliana OX=3702 GN=ECA1 PE=1 SV=2	hypothetical protein ES319_A03G045700v1 [Gossypium barbadense]	molecular function: binding (GO:0005488);; cellular component: membrane (GO:0016020);; cellular component: membrane part (GO:0044425)
Gh_A03G050500	191	fadH	--	--	--	--	--	--	4.14983e-48	5.72899	up	4.59914e-53	6.08717	up	0.000594421	1.49239	up	3.26991e-06	1.92517	up	3.73141e-107	5.20038	up	1.56639e-36	3.9875	up		--	--	--	0.000385029	1.75478	up	0.000750783	1.30656	up	0.0199959	-0.554446	normal	1.18691e-21	-2.10579	down	--	--	--	Protein of unknown function (DUF1635)	--	PREDICTED: uncharacterized protein LOC107963932 [Gossypium hirsutum]	--
Gh_A03G051300	192	HIS2B	0.00977202	-0.746589	normal	0.757831	-0.103191	normal	0.000113204	-0.921652	normal	2.10312e-07	-1.62704	down	1.05548e-09	-1.07001	down	2.02092e-07	-1.0555	down	0.114178	-0.297278	normal	2.88138e-14	-1.46021	down		0.90236	0.117615	normal	0.179902	-0.200906	normal	1.9866e-09	-0.854756	normal	3.97459e-13	0.756229	normal	0.0274598	0.314926	normal	Cellular Component: nucleosome (GO:0000786);; Molecular Function: DNA binding (GO:0003677);; Cellular Component: nucleus (GO:0005634);; Molecular Function: protein heterodimerization activity (GO:0046982);;	K11252|4.9e-60|gab:108461293|K11252 histone H2B | (RefSeq) histone H2B	--	Core histone H2A/H2B/H3/H4	Histone H2B OS=Gossypium hirsutum OX=3635 GN=HIS2B PE=2 SV=3	PREDICTED: histone H2B [Gossypium raimondii]	cellular component: cell (GO:0005623);; cellular component: macromolecular complex (GO:0032991);; cellular component: organelle (GO:0043226);; cellular component: organelle part (GO:0044422);; cellular component: cell part (GO:0044464);; molecular function: binding (GO:0005488)
Gh_A03G058600	193	LAC2	--	--	--	--	--	--	--	--	--	--	--	--	0.775899	0.163817	normal	--	--	--	0.0503521	-0.920872	normal	--	--	--		0.787667	0.390763	normal	0.000571089	1.98533	up	--	--	--	0.00136135	1.82685	up	--	--	--	Molecular Function: copper ion binding (GO:0005507);; Biological Process: lignin catabolic process (GO:0046274);; Cellular Component: apoplast (GO:0048046);; Molecular Function: hydroquinone:oxygen oxidoreductase activity (GO:0052716);;	K05909|0.0e+00|ghi:107885975|K05909 laccase [EC:1.10.3.2] | (RefSeq) laccase-2-like isoform X1	--	Multicopper oxidase	Laccase-2 OS=Arabidopsis thaliana OX=3702 GN=LAC2 PE=2 SV=1	PREDICTED: laccase-2-like isoform X1 [Gossypium hirsutum]	molecular function: binding (GO:0005488);; biological process: metabolic process (GO:0008152);; biological process: cellular process (GO:0009987);; biological process: single-organism process (GO:0044699);; cellular component: extracellular region (GO:0005576);; molecular function: catalytic activity (GO:0003824)
Gh_A03G062200	194	Gh_A03G062200	--	--	--	0.150206	0.811548	normal	0.376968	0.470532	normal	--	--	--	0.965092	0.0236844	normal	0.0904991	-1.00501	normal	0.3667	0.35382	normal	0.0011	-1.29626	down		0.15834	1.10018	normal	0.00219513	1.44947	up	0.370018	-0.733195	normal	0.00190941	0.999587	normal	--	--	--	Molecular Function: metal ion binding (GO:0046872);;	--	--	--	--	hypothetical protein ES332_A03G065400v1 [Gossypium tomentosum]	molecular function: binding (GO:0005488)
Gh_A03G063500	195	IRX12	0.173415	-0.455409	normal	0.0784742	0.362431	normal	0.000362643	-0.684798	normal	5.34292e-07	-2.59925	down	4.99069e-09	0.859498	normal	0.437884	-0.214512	normal	0.845895	-0.0461171	normal	1.02394e-10	-1.16522	down		0.478205	-0.22373	normal	2.08217e-05	1.09618	up	0.00597452	-0.81983	normal	0.0508461	0.425527	normal	0.0146895	1.23228	up	Molecular Function: ferroxidase activity (GO:0004322);; Molecular Function: copper ion binding (GO:0005507);; Cellular Component: plasma membrane (GO:0005886);; Biological Process: iron ion transport (GO:0006826);; Biological Process: lignin catabolic process (GO:0046274);; Cellular Component: apoplast (GO:0048046);; Molecular Function: hydroquinone:oxygen oxidoreductase activity (GO:0052716);; B…	K05909|0.0e+00|ghi:107886050|K05909 laccase [EC:1.10.3.2] | (RefSeq) laccase-4-like	--	Multicopper oxidase	Laccase-4 OS=Arabidopsis thaliana OX=3702 GN=IRX12 PE=2 SV=2	PREDICTED: laccase-4-like [Gossypium hirsutum]	biological process: metabolic process (GO:0008152);; biological process: single-organism process (GO:0044699);; molecular function: catalytic activity (GO:0003824);; molecular function: binding (GO:0005488);; cellular component: cell (GO:0005623);; cellular component: membrane (GO:0016020);; cellular component: cell part (GO:0044464);; biological process: localization (GO:0051179);; biological pr…
Gh_A03G065700	196	NPC1	0.32557	0.392533	normal	0.0246288	0.75552	normal	7.71395e-10	1.73305	up	5.46468e-07	1.62018	up	--	--	--	7.47516e-06	1.78727	up	2.36435e-30	3.2362	up	1.65503e-12	2.49589	up		--	--	--	0.0306411	-1.30049	down	0.97395	0.0207591	normal	0.0093282	0.523037	normal	0.782076	-0.0872332	normal	Molecular Function: hydrolase activity, acting on ester bonds (GO:0016788);;	K01114|4.6e-283|ghi:107928748|K01114 phospholipase C [EC:3.1.4.3] | (RefSeq) non-specific phospholipase C1-like isoform X1	Inositol phosphate metabolism (ko00562);; Glycerophospholipid metabolism (ko00564);; Ether lipid metabolism (ko00565)	Phosphoesterase family	Non-specific phospholipase C1 OS=Arabidopsis thaliana OX=3702 GN=NPC1 PE=2 SV=1	hypothetical protein ES332_A03G069100v1 [Gossypium tomentosum]	molecular function: catalytic activity (GO:0003824)
Gh_A03G066100	197	CYB5	--	--	--	0.606925	-1.53364	normal	--	--	--	1.04215e-05	-9.14134	down	4.90778e-08	-2.58814	down	3.58942e-13	-4.34219	down	2.15172e-12	-3.84032	down	9.12931e-08	-2.68898	down		0.995656	0.0195265	normal	--	--	--	--	--	--	--	--	--	--	--	--	Cellular Component: integral component of membrane (GO:0016021);; Molecular Function: heme binding (GO:0020037);; Molecular Function: metal ion binding (GO:0046872);;	K23490|2.5e-71|ghi:107950355|K23490 cytochrome b5 | (RefSeq) cytochrome b5-like	--	Cytochrome b5-like Heme/Steroid binding domain	Cytochrome b5 OS=Brassica oleracea var. botrytis OX=3715 GN=CYB5 PE=1 SV=1	PREDICTED: cytochrome b5-like [Gossypium hirsutum]	cellular component: membrane (GO:0016020);; cellular component: membrane part (GO:0044425);; molecular function: binding (GO:0005488)
Gh_A03G066200	198	YSL3	0.118463	-1.96811	normal	0.702842	0.327623	normal	7.07616e-06	-3.53057	down	0.000122682	-3.69305	down	0.0112253	-0.50556	normal	0.0201746	-0.65956	normal	3.9161e-20	-2.04831	down	2.18945e-28	-2.8742	down		0.172934	1.89787	normal	1.21634e-05	3.36804	up	0.00942164	0.88295	normal	2.59432e-08	3.36727	up	1.4668e-08	2.72825	up	Cellular Component: plasma membrane (GO:0005886);; Biological Process: response to iron ion (GO:0010039);; Cellular Component: membrane (GO:0016020);; Cellular Component: integral component of membrane (GO:0016021);; Biological Process: seed development (GO:0048316);; Molecular Function: iron-nicotianamine transmembrane transporter activity (GO:0051980);;	K15363|6.2e-54|bna:111210893|K15363 fanconi-associated nuclease 1 [EC:3.1.21.- 3.1.4.1] | (RefSeq) fanconi-associated nuclease 1 homolog	--	OPT oligopeptide transporter protein	Metal-nicotianamine transporter YSL3 OS=Arabidopsis thaliana OX=3702 GN=YSL3 PE=2 SV=1	PREDICTED: metal-nicotianamine transporter YSL3-like [Gossypium hirsutum]	cellular component: cell (GO:0005623);; cellular component: membrane (GO:0016020);; cellular component: cell part (GO:0044464);; biological process: response to stimulus (GO:0050896);; cellular component: membrane part (GO:0044425);; biological process: reproduction (GO:0000003);; biological process: reproductive process (GO:0022414);; biological process: multicellular organismal process (GO:0032…
Gh_A03G068100	199	PAP27	--	--	--	--	--	--	--	--	--	--	--	--	0.00403463	-1.03504	down	6.99289e-07	-1.83372	down	0.732098	-0.130329	normal	7.327e-10	-3.53104	down		0.22512	1.18303	normal	--	--	--	--	--	--	0.00013972	1.61208	up	--	--	--	Molecular Function: acid phosphatase activity (GO:0003993);; Molecular Function: metal ion binding (GO:0046872);;	K22390|0.0e+00|ghi:107886368|K22390 acid phosphatase type 7 | (RefSeq) probable inactive purple acid phosphatase 27	--	Fn3-like domain from Purple Acid Phosphatase	Probable inactive purple acid phosphatase 27 OS=Arabidopsis thaliana OX=3702 GN=PAP27 PE=2 SV=1	PREDICTED: probable inactive purple acid phosphatase 27 [Gossypium hirsutum]	biological process: metabolic process (GO:0008152);; biological process: cellular process (GO:0009987);; molecular function: catalytic activity (GO:0003824);; molecular function: binding (GO:0005488)
Gh_A03G069200	200	SWEET10	0.695891	-0.297896	normal	9.34689e-08	-3.6607	down	2.21069e-11	-9.22478	down	1.98057e-07	-8.73971	down	5.50872e-07	-1.89113	down	2.09064e-11	-7.72939	down	4.026e-15	-10.0206	down	7.45785e-15	-6.8263	down		0.511047	0.655078	normal	0.111656	-0.92947	normal	--	--	--	--	--	--	--	--	--	Cellular Component: plasma membrane (GO:0005886);; Biological Process: carbohydrate transport (GO:0008643);; Cellular Component: integral component of membrane (GO:0016021);;	K15382|9.3e-133|gab:108459370|K15382 solute carrier family 50 (sugar transporter) | (RefSeq) bidirectional sugar transporter SWEET10-like	--	Sugar efflux transporter for intercellular exchange	Bidirectional sugar transporter SWEET10 OS=Arabidopsis thaliana OX=3702 GN=SWEET10 PE=1 SV=1	PREDICTED: bidirectional sugar transporter SWEET10-like [Gossypium arboreum]	cellular component: cell (GO:0005623);; cellular component: membrane (GO:0016020);; cellular component: cell part (GO:0044464);; biological process: single-organism process (GO:0044699);; biological process: localization (GO:0051179);; cellular component: membrane part (GO:0044425)
Gh_A03G072300	201	SCRM	0.206373	-0.631562	normal	0.675801	-0.231405	normal	0.106403	0.66051	normal	0.000116814	-1.87115	down	0.20636	0.277217	normal	0.924843	0.039798	normal	0.0101124	0.531443	normal	0.584174	0.138918	normal		0.946968	0.0940663	normal	0.000176114	1.00368	up	0.597825	0.345977	normal	0.955489	-0.0171201	normal	5.40985e-17	2.13706	up	Molecular Function: protein dimerization activity (GO:0046983);;	K13422|6.8e-14|dct:110116479|K13422 transcription factor MYC2 | (RefSeq) transcription factor MYC2	MAPK signaling pathway - plant (ko04016);; Plant hormone signal transduction (ko04075)	Helix-loop-helix DNA-binding domain	Transcription factor ICE1 OS=Arabidopsis thaliana OX=3702 GN=SCRM PE=1 SV=1	PREDICTED: transcription factor ICE1-like [Gossypium hirsutum]	molecular function: binding (GO:0005488)
Gh_A03G073100	202	PCH2	--	--	--	--	--	--	0.336162	-0.522743	normal	--	--	--	0.000489612	-1.83727	down	7.06044e-05	-2.64927	down	5.34739e-05	-1.91068	down	4.60572e-06	-3.02337	down		0.717883	0.513439	normal	--	--	--	--	--	--	0.0348713	-0.859689	normal	--	--	--	Molecular Function: ATP binding (GO:0005524);;	K22399|1.9e-264|ghi:107886216|K22399 pachytene checkpoint protein 2 | (RefSeq) pachytene checkpoint protein 2 homolog	--	ATPase family associated with various cellular activities (AAA)	Pachytene checkpoint protein 2 homolog OS=Arabidopsis thaliana OX=3702 GN=PCH2 PE=2 SV=1	PREDICTED: pachytene checkpoint protein 2 homolog [Gossypium hirsutum]	molecular function: binding (GO:0005488)
Gh_A03G073400	203	Gh_A03G073400	0.613398	0.599557	normal	1.09953e-05	-2.21439	down	0.184062	-0.516892	normal	0.200618	-0.644687	normal	4.72023e-05	-1.1064	down	2.2009e-15	-2.69551	down	4.38571e-06	-1.1432	down	5.37596e-23	-2.68582	down		0.611783	0.459931	normal	0.276145	-1.24495	normal	0.968024	-0.041167	normal	0.493864	-0.14506	normal	1.22246e-09	-1.54507	down	Molecular Function: enzyme inhibitor activity (GO:0004857);;	K01051|4.6e-13|cic:CICLE_v10007806mg|K01051 pectinesterase [EC:3.1.1.11] | (RefSeq) hypothetical protein	Pentose and glucuronate interconversions (ko00040)	Plant invertase/pectin methylesterase inhibitor	21 kDa protein OS=Daucus carota OX=4039 PE=2 SV=1	PREDICTED: 21 kDa protein-like [Gossypium hirsutum]	biological process: biological regulation (GO:0065007);; molecular function: molecular function regulator (GO:0098772)
Gh_A03G073800	204	Gh_A03G073800	6.06039e-05	-1.2891	down	0.0195722	1.10869	up	7.15987e-18	-2.50667	down	6.7962e-38	-5.13374	down	2.95846e-63	-2.47414	down	0.808889	0.0658976	normal	8.6457e-17	-1.37858	down	1.56366e-224	-4.69142	down	-1.18504	0.474526	0.400617	normal	0.000418254	-0.775952	normal	0.465963	-0.660178	normal	3.86597e-26	1.52895	up	0.00103962	0.863992	normal	Molecular Function: enzyme inhibitor activity (GO:0004857);; Biological Process: negative regulation of catalytic activity (GO:0043086);;	K01051|3.2e-14|pda:103711449|K01051 pectinesterase [EC:3.1.1.11] | (RefSeq) putative pectinesterase/pectinesterase inhibitor 28	Pentose and glucuronate interconversions (ko00040)	Plant invertase/pectin methylesterase inhibitor	21 kDa protein OS=Daucus carota OX=4039 PE=2 SV=1	PREDICTED: 21 kDa protein-like [Gossypium hirsutum]	biological process: biological regulation (GO:0065007);; molecular function: molecular function regulator (GO:0098772)
Gh_A03G075000	205	SMC2-1	0.0758382	-3.63496	normal	0.252751	-2.52771	normal	0.0020489	-2.28904	down	0.357638	-0.954428	normal	0.000138559	-3.74064	down	4.07427e-24	-5.70505	down	0.00346613	-3.14239	down	4.18428e-25	-5.95339	down		0.811378	0.495261	normal	--	--	--	--	--	--	0.714752	-0.32241	normal	1.77306e-09	-4.45206	down	Molecular Function: ATP binding (GO:0005524);; Cellular Component: nucleus (GO:0005634);; Cellular Component: chromosome (GO:0005694);; Biological Process: chromosome organization (GO:0051276);;	K06674|0.0e+00|ghi:107947348|K06674 structural maintenance of chromosome 2 | (RefSeq) structural maintenance of chromosomes protein 2-1-like	--	RecF/RecN/SMC N terminal domain	Structural maintenance of chromosomes protein 2-2 OS=Arabidopsis thaliana OX=3702 GN=SMC2-2 PE=2 SV=1	PREDICTED: structural maintenance of chromosomes protein 2-1-like [Gossypium hirsutum]	molecular function: binding (GO:0005488);; cellular component: cell (GO:0005623);; cellular component: organelle (GO:0043226);; cellular component: cell part (GO:0044464);; biological process: cellular process (GO:0009987);; biological process: cellular component organization or biogenesis (GO:0071840)
Gh_A03G080500	206	SEOB	0.346682	0.439337	normal	0.110329	0.49843	normal	0.00137227	0.94388	normal	0.0424279	0.892974	normal	2.62259e-15	1.04061	up	0.0306006	0.558165	normal	1.51197e-05	0.766864	normal	0.0220988	0.750238	normal		0.959038	-0.0529515	normal	0.118287	0.555371	normal	0.985676	-0.0113147	normal	0.265345	-0.228313	normal	0.812685	-0.174987	normal	Biological Process: phloem development (GO:0010088);;	--	--	Sieve element occlusion N-terminus	Protein SIEVE ELEMENT OCCLUSION B OS=Arabidopsis thaliana OX=3702 GN=SEOB PE=1 SV=1	PREDICTED: protein SIEVE ELEMENT OCCLUSION B-like [Gossypium hirsutum]	biological process: developmental process (GO:0032502)
Gh_A03G086000	207	BHLH72	--	--	--	--	--	--	--	--	--	7.47285e-07	-8.49658	down	1.99387e-08	-2.68941	down	6.30573e-09	-4.95504	down	1.73462e-14	-4.6011	down	1.71165e-14	-4.85011	down		0.947292	0.123617	normal	--	--	--	--	--	--	--	--	--	--	--	--	Cellular Component: nucleus (GO:0005634);; Molecular Function: protein dimerization activity (GO:0046983);;	K12126|1.0e-17|sbi:110433966|K12126 phytochrome-interacting factor 3 | (RefSeq) transcription factor APG-like isoform X1	Plant hormone signal transduction (ko04075);; Circadian rhythm - plant (ko04712)	Helix-loop-helix DNA-binding domain	Transcription factor PIF7 OS=Arabidopsis thaliana OX=3702 GN=BHLH72 PE=1 SV=2	PREDICTED: transcription factor PIF7-like [Gossypium hirsutum]	cellular component: cell (GO:0005623);; cellular component: organelle (GO:0043226);; cellular component: cell part (GO:0044464);; molecular function: binding (GO:0005488)
Gh_A03G088200	208	RPA1B	--	--	--	0.161433	-3.40863	normal	--	--	--	0.0023782	-6.83192	down	0.000122414	-3.45961	down	0.000633272	-5.42489	down	3.4356e-05	-4.35389	down	2.14087e-18	-11.2802	down		0.978128	0.153336	normal	--	--	--	--	--	--	--	--	--	--	--	--	Biological Process: telomere maintenance (GO:0000723);; Biological Process: double-strand break repair via homologous recombination (GO:0000724);; Cellular Component: nuclear chromosome, telomeric region (GO:0000784);; Molecular Function: damaged DNA binding (GO:0003684);; Molecular Function: single-stranded DNA binding (GO:0003697);; Cellular Component: DNA replication factor A complex (GO:00056…	K07466|3.2e-278|nto:104091413|K07466 replication factor A1 | (RefSeq) replication protein A 70 kDa DNA-binding subunit B	DNA replication (ko03030);; Nucleotide excision repair (ko03420);; Mismatch repair (ko03430);; Homologous recombination (ko03440)	Replication factor-A C terminal domain	Replication protein A 70 kDa DNA-binding subunit D OS=Arabidopsis thaliana OX=3702 GN=RPA1D PE=2 SV=1	PREDICTED: replication protein A 70 kDa DNA-binding subunit B-like [Gossypium hirsutum]	biological process: metabolic process (GO:0008152);; biological process: cellular process (GO:0009987);; biological process: biological regulation (GO:0065007);; biological process: cellular component organization or biogenesis (GO:0071840);; biological process: response to stimulus (GO:0050896);; cellular component: cell (GO:0005623);; cellular component: membrane-enclosed lumen (GO:0031974);; c…
Gh_A03G090600	209	wdhd1	0.0966793	-1.10016	normal	0.169362	-0.970561	normal	0.197613	-0.765597	normal	0.99048	-0.00999942	normal	0.000179971	-1.32677	down	0.00136814	-1.19341	down	0.0107091	-0.878114	normal	0.811063	0.0896124	normal		0.9502	0.139377	normal	0.873313	-0.0845145	normal	0.889642	-0.10671	normal	0.867183	0.0520677	normal	0.254768	0.276565	normal	Biological Process: mitotic cell cycle (GO:0000278);; Molecular Function: DNA binding (GO:0003677);; Molecular Function: chromatin binding (GO:0003682);; Biological Process: DNA-dependent DNA replication (GO:0006261);; Biological Process: DNA repair (GO:0006281);; Biological Process: cellular response to DNA damage stimulus (GO:0006974);; Cellular Component: replication fork protection complex (G…	K11274|0.0e+00|ghi:107887072|K11274 chromosome transmission fidelity protein 4 | (RefSeq) WD repeat and HMG-box DNA-binding protein 1-like isoform X1	--	Minichromosome loss protein, Mcl1, middle region	--	PREDICTED: WD repeat and HMG-box DNA-binding protein 1-like isoform X1 [Gossypium hirsutum]	biological process: cellular process (GO:0009987);; biological process: single-organism process (GO:0044699);; molecular function: binding (GO:0005488);; biological process: metabolic process (GO:0008152);; biological process: response to stimulus (GO:0050896);; cellular component: cell (GO:0005623);; cellular component: membrane-enclosed lumen (GO:0031974);; cellular component: macromolecular co…
Gh_A03G092800	210	KIN8A	--	--	--	0.0072941	-2.87029	down	0.00231159	-3.07564	down	0.000499394	-4.20193	down	9.93821e-10	-2.7948	down	0.00334834	-6.05173	down	5.39363e-06	-4.1758	down	2.02978e-09	-7.78232	down		0.989052	0.0730249	normal	--	--	--	--	--	--	--	--	--	--	--	--	Molecular Function: microtubule motor activity (GO:0003777);; Molecular Function: ATP binding (GO:0005524);; Cellular Component: kinesin complex (GO:0005871);; Cellular Component: microtubule (GO:0005874);; Biological Process: microtubule-based movement (GO:0007018);; Molecular Function: microtubule binding (GO:0008017);; Molecular Function: ATP-dependent microtubule motor activity, plus-end-dire…	K10401|0.0e+00|ghi:107887060|K10401 kinesin family member 18/19 | (RefSeq) kinesin-like protein KIF18A isoform X1	--	Kinesin motor domain	Kinesin-like protein KIN-8A OS=Arabidopsis thaliana OX=3702 GN=KIN8A PE=3 SV=1	PREDICTED: kinesin-like protein KIF18A isoform X1 [Gossypium hirsutum]	molecular function: catalytic activity (GO:0003824);; molecular function: binding (GO:0005488);; cellular component: cell (GO:0005623);; cellular component: macromolecular complex (GO:0032991);; cellular component: organelle (GO:0043226);; cellular component: organelle part (GO:0044422);; cellular component: cell part (GO:0044464);; cellular component: supramolecular complex (GO:0099080);; biolog…
Gh_A03G096500	211	SPT16	--	--	--	--	--	--	--	--	--	--	--	--	1.05341e-05	2.33148	up	--	--	--	--	--	--	--	--	--		--	--	--	0.329447	0.573646	normal	--	--	--	0.0483816	-1.23476	down	--	--	--	Cellular Component: integral component of membrane (GO:0016021);;	--	--	--	--	hypothetical protein ES319_A03G090700v1 [Gossypium barbadense]	cellular component: membrane (GO:0016020);; cellular component: membrane part (GO:0044425)
Gh_A03G098500	212	NHL13	0.0483958	-0.737132	normal	0.530253	-0.244604	normal	0.00149523	-0.796937	normal	3.06235e-15	-2.35559	down	3.94792e-15	-1.6444	down	2.9242e-08	-2.42754	down	2.39434e-19	-1.80573	down	9.11179e-09	-1.43113	down		0.000586714	0.891284	normal	0.985836	-0.0122022	normal	0.0364042	-1.30686	down	0.686435	-0.110395	normal	2.71017e-07	1.84132	up	Cellular Component: integral component of membrane (GO:0016021);;	--	--	--	--	PREDICTED: uncharacterized protein LOC107887312 [Gossypium hirsutum]	cellular component: membrane (GO:0016020);; cellular component: membrane part (GO:0044425)
Gh_A03G104100	213	MCM2	--	--	--	0.358978	-3.45346	normal	--	--	--	0.00150903	-10.1521	down	2.97486e-08	-3.28086	down	0.000118357	-6.50767	down	6.76361e-17	-4.78543	down	7.53117e-14	-9.92872	down		0.932848	-0.499715	normal	--	--	--	--	--	--	--	--	--	--	--	--	Molecular Function: DNA binding (GO:0003677);; Molecular Function: DNA helicase activity (GO:0003678);; Molecular Function: ATP binding (GO:0005524);; Cellular Component: nucleus (GO:0005634);; Biological Process: DNA replication initiation (GO:0006270);; Cellular Component: MCM complex (GO:0042555);; Biological Process: negative regulation of DNA helicase activity (GO:1905775);;	K02540|0.0e+00|gab:108489880|K02540 DNA replication licensing factor MCM2 [EC:3.6.4.12] | (RefSeq) LOW QUALITY PROTEIN: DNA replication licensing factor MCM2-like	DNA replication (ko03030)	MCM P-loop domain	DNA replication licensing factor MCM2 OS=Oryza sativa subsp. indica OX=39946 GN=OsI_36121 PE=3 SV=1	PREDICTED: LOW QUALITY PROTEIN: DNA replication licensing factor MCM2-like [Gossypium arboreum]	molecular function: binding (GO:0005488);; molecular function: catalytic activity (GO:0003824);; cellular component: cell (GO:0005623);; cellular component: organelle (GO:0043226);; cellular component: cell part (GO:0044464);; biological process: metabolic process (GO:0008152);; biological process: cellular process (GO:0009987);; cellular component: macromolecular complex (GO:0032991);; biologica…
Gh_A03G115800	214	RAV1	0.0447728	-0.802534	normal	0.855816	0.118009	normal	1.27183e-11	-3.22513	down	1.65871e-09	-6.95094	down	6.56913e-09	-1.82587	down	0.0137859	-0.794146	normal	3.42555e-41	-3.50594	down	5.19087e-10	-2.40127	down		0.00546674	0.923581	normal	0.905727	-0.0939326	normal	0.995944	-0.00596753	normal	--	--	--	2.59997e-05	5.50102	up	Molecular Function: DNA binding (GO:0003677);; Molecular Function: transcription factor activity, sequence-specific DNA binding (GO:0003700);; Cellular Component: nucleus (GO:0005634);;	K09287|2.2e-196|ghi:107887166|K09287 RAV-like factor | (RefSeq) AP2/ERF and B3 domain-containing transcription factor RAV1-like	--	B3 DNA binding domain	AP2/ERF and B3 domain-containing transcription factor RAV1 OS=Arabidopsis thaliana OX=3702 GN=RAV1 PE=1 SV=1	PREDICTED: AP2/ERF and B3 domain-containing transcription factor RAV1-like [Gossypium hirsutum]	molecular function: binding (GO:0005488);; biological process: biological regulation (GO:0065007);; molecular function: nucleic acid binding transcription factor activity (GO:0001071);; cellular component: cell (GO:0005623);; cellular component: organelle (GO:0043226);; cellular component: cell part (GO:0044464)
Gh_A03G118700	215	SBH2	--	--	--	0.00121078	2.44141	up	0.000561792	2.47025	up	--	--	--	1.54874e-05	2.02204	up	2.67752e-07	2.3559	up	3.76097e-09	2.05129	up	2.44364e-16	2.71996	up		--	--	--	0.293397	0.598506	normal	0.839861	0.160506	normal	0.599949	-0.157539	normal	0.00417231	1.87185	up	Molecular Function: iron ion binding (GO:0005506);; Biological Process: lipid biosynthetic process (GO:0008610);; Cellular Component: integral component of membrane (GO:0016021);; Molecular Function: oxidoreductase activity (GO:0016491);;	K04713|1.6e-140|ghi:107886264|K04713 sphinganine C4-monooxygenase [EC:1.14.18.5] | (RefSeq) sphinganine C4-monooxygenase 2-like	Sphingolipid metabolism (ko00600)	Fatty acid hydroxylase superfamily	Sphinganine C4-monooxygenase 2 OS=Arabidopsis thaliana OX=3702 GN=SBH2 PE=1 SV=1	PREDICTED: sphinganine C4-monooxygenase 2-like [Gossypium hirsutum]	molecular function: binding (GO:0005488);; biological process: metabolic process (GO:0008152);; biological process: single-organism process (GO:0044699);; cellular component: membrane (GO:0016020);; cellular component: membrane part (GO:0044425);; molecular function: catalytic activity (GO:0003824)
Gh_A03G118800	216	SBH2	0.00944374	0.971407	normal	0.117664	0.624841	normal	7.59328e-65	-7.74681	down	1.76396e-27	-5.70835	down	0.000141077	0.692529	normal	3.54172e-05	-1.0658	down	7.59696e-102	-8.2821	down	0.000344347	-1.33084	down		0.107765	-0.796544	normal	4.14931e-07	-1.06605	down	1.78114e-20	-2.5078	down	--	--	--	4.65274e-11	3.59852	up	Molecular Function: iron ion binding (GO:0005506);; Biological Process: lipid biosynthetic process (GO:0008610);; Cellular Component: integral component of membrane (GO:0016021);; Molecular Function: oxidoreductase activity (GO:0016491);;	K04713|2.4e-150|ghi:107886265|K04713 sphinganine C4-monooxygenase [EC:1.14.18.5] | (RefSeq) sphinganine C4-monooxygenase 1-like	Sphingolipid metabolism (ko00600)	Fatty acid hydroxylase superfamily	Sphinganine C4-monooxygenase 1 OS=Arabidopsis thaliana OX=3702 GN=SBH1 PE=1 SV=1	PREDICTED: sphinganine C4-monooxygenase 1-like [Gossypium hirsutum]	molecular function: binding (GO:0005488);; biological process: metabolic process (GO:0008152);; biological process: single-organism process (GO:0044699);; cellular component: membrane (GO:0016020);; cellular component: membrane part (GO:0044425);; molecular function: catalytic activity (GO:0003824)
Gh_A03G119700	217	NPF3.1	0.00998719	1.07069	up	1.57233e-08	1.79897	up	5.96326e-18	2.74693	up	0.334366	0.537195	normal	2.96575e-20	2.08843	up	0.000578765	1.33372	up	5.79544e-29	2.30981	up	0.373444	-0.377876	normal	1.01774	0.934263	0.109401	normal	4.05324e-06	1.12821	up	0.475236	-0.377011	normal	0.160399	-0.31556	normal	0.154996	-0.773609	normal	Cellular Component: plasma membrane (GO:0005886);; Molecular Function: peptide:proton symporter activity (GO:0015333);; Cellular Component: integral component of membrane (GO:0016021);; Molecular Function: oligopeptide transmembrane transporter activity (GO:0035673);; Molecular Function: peptide transmembrane transporter activity (GO:1904680);;	K14638|0.0e+00|ghi:107886263|K14638 solute carrier family 15 (peptide/histidine transporter), member 3/4 | (RefSeq) protein NRT1/ PTR FAMILY 3.1-like	--	POT family	Protein NRT1/ PTR FAMILY 3.1 OS=Arabidopsis thaliana OX=3702 GN=NPF3.1 PE=2 SV=1	PREDICTED: protein NRT1/ PTR FAMILY 3.1-like [Gossypium hirsutum]	cellular component: cell (GO:0005623);; cellular component: membrane (GO:0016020);; cellular component: cell part (GO:0044464);; biological process: single-organism process (GO:0044699);; biological process: localization (GO:0051179);; molecular function: transporter activity (GO:0005215);; cellular component: membrane part (GO:0044425)
Gh_A03G119900	218	NPF3.1	0.691624	0.399778	normal	0.0379608	1.7462	up	4.78898e-05	2.79817	up	0.328727	1.005	normal	2.59465e-08	2.13824	up	8.51628e-05	1.78935	up	9.67623e-10	2.45865	up	0.337248	0.49076	normal		0.881584	-0.378812	normal	0.000218246	1.35956	up	0.653168	-0.356842	normal	0.0552138	-0.690785	normal	0.0850827	-0.853953	normal	Cellular Component: plasma membrane (GO:0005886);; Molecular Function: peptide:proton symporter activity (GO:0015333);; Cellular Component: integral component of membrane (GO:0016021);; Molecular Function: oligopeptide transmembrane transporter activity (GO:0035673);; Molecular Function: peptide transmembrane transporter activity (GO:1904680);;	K14638|0.0e+00|ghi:107887170|K14638 solute carrier family 15 (peptide/histidine transporter), member 3/4 | (RefSeq) protein NRT1/ PTR FAMILY 3.1-like	--	POT family	Protein NRT1/ PTR FAMILY 3.1 OS=Arabidopsis thaliana OX=3702 GN=NPF3.1 PE=2 SV=1	PREDICTED: protein NRT1/ PTR FAMILY 3.1-like [Gossypium hirsutum]	cellular component: cell (GO:0005623);; cellular component: membrane (GO:0016020);; cellular component: cell part (GO:0044464);; biological process: single-organism process (GO:0044699);; biological process: localization (GO:0051179);; molecular function: transporter activity (GO:0005215);; cellular component: membrane part (GO:0044425)
Gh_A03G141500	219	At2g01630	--	--	--	--	--	--	--	--	--	--	--	--	0.0011869	-1.26412	down	0.00187537	-2.87078	down	1.09164e-07	-2.48635	down	1.49468e-11	-4.92278	down		0.279799	1.64766	normal	--	--	--	--	--	--	--	--	--	--	--	--	Molecular Function: hydrolase activity, hydrolyzing O-glycosyl compounds (GO:0004553);; Biological Process: carbohydrate metabolic process (GO:0005975);; Cellular Component: anchored component of plasma membrane (GO:0046658);;	K19891|2.2e-285|ghi:107886273|K19891 glucan endo-1,3-beta-glucosidase 1/2/3 [EC:3.2.1.39] | (RefSeq) glucan endo-1,3-beta-glucosidase 3-like	Starch and sucrose metabolism (ko00500)	Glycosyl hydrolases family 17	Glucan endo-1,3-beta-glucosidase 3 OS=Arabidopsis thaliana OX=3702 GN=At2g01630 PE=2 SV=2	PREDICTED: glucan endo-1,3-beta-glucosidase 3-like [Gossypium hirsutum]	molecular function: catalytic activity (GO:0003824);; biological process: metabolic process (GO:0008152);; cellular component: cell (GO:0005623);; cellular component: membrane (GO:0016020);; cellular component: membrane part (GO:0044425);; cellular component: cell part (GO:0044464)
Gh_A03G142700	220	PMEI11	0.661199	-0.309441	normal	--	--	--	--	--	--	--	--	--	--	--	--	--	--	--	--	--	--	--	--	--		0.933864	-0.164214	normal	0.00672674	-1.31397	down	--	--	--	--	--	--	--	--	--	Molecular Function: enzyme inhibitor activity (GO:0004857);;	K01051|6.8e-15|han:110880309|K01051 pectinesterase [EC:3.1.1.11] | (RefSeq) pectinesterase-like	Pentose and glucuronate interconversions (ko00040)	Plant invertase/pectin methylesterase inhibitor	Pectinesterase inhibitor 11 OS=Arabidopsis thaliana OX=3702 GN=PMEI11 PE=2 SV=1	PREDICTED: 21 kDa protein-like [Gossypium hirsutum]	biological process: biological regulation (GO:0065007);; molecular function: molecular function regulator (GO:0098772)
Gh_A03G152200	221	ABCC3	0.101737	1.95842	normal	1.10386e-05	2.80797	up	7.44911e-07	3.14221	up	5.69548e-07	3.89448	up	0.0185978	1.90854	up	0.00698287	2.10591	up	0.009057	2.05671	up	1.20368e-05	3.62119	up		0.473375	1.4646	normal	0.0965306	1.42572	normal	0.00518906	0.744176	normal	0.198066	0.384546	normal	9.37648e-05	1.21373	up	Cellular Component: plant-type vacuole (GO:0000325);; Molecular Function: ATP binding (GO:0005524);; Cellular Component: vacuolar membrane (GO:0005774);; Cellular Component: membrane (GO:0016020);; Cellular Component: integral component of membrane (GO:0016021);; Molecular Function: ATPase activity (GO:0016887);; Molecular Function: ATPase activity, coupled to transmembrane movement of substances…	K05666|0.0e+00|aip:110262356|K05666 ATP-binding cassette, subfamily C (CFTR/MRP), member 2 | (RefSeq) ABC transporter C family member 3-like isoform X1	ABC transporters (ko02010)	ABC transporter transmembrane region	ABC transporter C family member 3 OS=Arabidopsis thaliana OX=3702 GN=ABCC3 PE=1 SV=1	PREDICTED: putative ABC transporter C family member 15 [Gossypium hirsutum]	cellular component: cell (GO:0005623);; cellular component: organelle (GO:0043226);; cellular component: cell part (GO:0044464);; molecular function: binding (GO:0005488);; cellular component: membrane (GO:0016020);; cellular component: organelle part (GO:0044422);; cellular component: membrane part (GO:0044425);; molecular function: catalytic activity (GO:0003824);; biological process: localizat…
Gh_A03G152900	222	WDL7	--	--	--	--	--	--	--	--	--	--	--	--	6.10072e-05	-2.30514	down	1.8375e-10	-8.69876	down	4.42402e-06	-2.4781	down	9.28398e-10	-4.98104	down		0.999577	0.00229987	normal	--	--	--	--	--	--	--	--	--	--	--	--	--	--	--	Targeting protein for Xklp2 (TPX2) domain	Protein WVD2-like 7 OS=Arabidopsis thaliana OX=3702 GN=WDL7 PE=2 SV=1	PREDICTED: protein WVD2-like 7 [Gossypium hirsutum]	--
Gh_A03G153600	223	RGS1	--	--	--	--	--	--	--	--	--	--	--	--	0.00934111	0.995812	normal	7.78627e-08	1.80398	up	8.34056e-17	2.55266	up	2.07926e-05	1.51792	up		--	--	--	3.90087e-16	3.25269	up	3.15974e-28	4.08732	up	3.55907e-26	3.6644	up	4.72589e-09	2.51455	up	Cellular Component: integral component of membrane (GO:0016021);;	--	--	Regulator of G protein signaling domain	Regulator of G-protein signaling 1 OS=Arabidopsis thaliana OX=3702 GN=RGS1 PE=1 SV=1	PREDICTED: regulator of G-protein signaling 1-like [Gossypium hirsutum]	cellular component: membrane (GO:0016020);; cellular component: membrane part (GO:0044425)
Gh_A03G154700	224	JGB	0.967513	-0.0331137	normal	0.744591	-0.275246	normal	0.195921	-0.772474	normal	0.874086	0.123569	normal	2.65876e-07	0.865742	normal	0.308215	0.267565	normal	0.516261	0.131686	normal	0.236333	0.345178	normal		0.0516057	1.31156	normal	6.59431e-20	2.22153	up	9.12977e-05	1.83991	up	1.60399e-26	2.21736	up	9.08114e-06	1.55441	up	Molecular Function: nucleotide binding (GO:0000166);; Biological Process: mitotic cell cycle (GO:0000278);; Biological Process: mitotic cytokinesis (GO:0000281);; Biological Process: cytokinesis (GO:0000910);; Molecular Function: molecular_function (GO:0003674);; Molecular Function: catalytic activity (GO:0003824);; Molecular Function: protein kinase activity (GO:0004672);; Molecular Function: pr…	K14963|1.4e-09|var:108321830|K14963 COMPASS component SWD3 | (RefSeq) myosin heavy chain kinase B-like	--	WD domain, G-beta repeat	Protein JINGUBANG OS=Arabidopsis thaliana OX=3702 GN=JGB PE=1 SV=1	hypothetical protein E1A91_A03G147500v1 [Gossypium mustelinum]	molecular function: binding (GO:0005488);; biological process: cellular process (GO:0009987);; biological process: single-organism process (GO:0044699);; molecular function: catalytic activity (GO:0003824);; biological process: metabolic process (GO:0008152);; cellular component: cell (GO:0005623);; cellular component: cell part (GO:0044464);; cellular component: organelle (GO:0043226);; cellular…
Gh_A03G155000	225	SEOB	0.178103	0.391921	normal	0.415983	0.236691	normal	0.204726	0.314072	normal	0.0117421	-3.34706	down	1.17981e-10	1.31806	up	0.239272	0.466426	normal	0.0774624	-0.464716	normal	0.00833844	-1.19229	down		0.992926	-0.0075089	normal	0.000161429	0.924774	normal	0.771084	0.203253	normal	0.00132447	-0.778899	normal	0.316062	2.15945	normal	Biological Process: phloem development (GO:0010088);;	--	--	Sieve element occlusion N-terminus	Protein SIEVE ELEMENT OCCLUSION B OS=Arabidopsis thaliana OX=3702 GN=SEOB PE=1 SV=1	hypothetical protein ES332_A03G159600v1 [Gossypium tomentosum]	biological process: developmental process (GO:0032502)
Gh_A03G162600	226	AMSH2	0.00318026	0.894138	normal	0.00220024	0.851101	normal	0.666903	-0.151255	normal	0.678751	0.182126	normal	0.361934	0.363709	normal	0.000127797	1.05574	up	0.640989	0.153648	normal	0.107017	0.497654	normal		0.328504	-0.562642	normal	0.000154073	-1.08903	down	0.135127	-0.377122	normal	0.358985	-0.251006	normal	0.525863	-0.22329	normal	Molecular Function: protein binding (GO:0005515);; Biological Process: cellular protein modification process (GO:0006464);; Biological Process: proteolysis (GO:0006508);; Biological Process: nitrogen compound metabolic process (GO:0006807);; Biological Process: biological_process (GO:0008150);; Biological Process: metabolic process (GO:0008152);; Biological Process: cellular process (GO:0009987);…	K11866|6.0e-183|gra:105794653|K11866 STAM-binding protein [EC:3.4.19.12] | (RefSeq) AMSH-like ubiquitin thioesterase 2	Endocytosis (ko04144)	JAB1/Mov34/MPN/PAD-1 ubiquitin protease	AMSH-like ubiquitin thioesterase 2 OS=Arabidopsis thaliana OX=3702 GN=AMSH2 PE=2 SV=1	hypothetical protein ES319_A03G151700v1 [Gossypium barbadense]	molecular function: binding (GO:0005488);; biological process: metabolic process (GO:0008152);; biological process: cellular process (GO:0009987)
Gh_A03G163500	227	Gh_A03G163500	0.101566	-3.69777	normal	0.0113856	-3.49399	down	0.00173599	-5.82615	down	1.84575e-09	-11.0007	down	0.00290668	-2.27544	down	3.83282e-05	-5.59292	down	0.00610921	-4.89808	down	4.68524e-12	-8.78927	down		0.992081	-0.0458987	normal	0.626156	1.3757	normal	--	--	--	--	--	--	--	--	--	--	--	--	Plant protein of unknown function (DUF936)	--	hypothetical protein ES319_A03G152500v1 [Gossypium barbadense]	--
Gh_A03G168000	228	Zmynd15	--	--	--	--	--	--	0.783084	0.226088	normal	--	--	--	0.977801	-0.011825	normal	0.525809	0.207227	normal	0.21881	0.361611	normal	0.033058	-0.614632	normal		0.513407	0.871585	normal	0.00093234	1.60128	up	0.000780992	1.36913	up	0.00149664	1.03424	up	0.0155701	1.87891	up	Molecular Function: metal ion binding (GO:0046872);;	K24081|4.5e-227|ghi:107886622|K24081 zinc finger MYND domain-containing protein 15 | (RefSeq) zinc finger MYND domain-containing protein 15-like	--	MYND finger	--	PREDICTED: zinc finger MYND domain-containing protein 15-like [Gossypium hirsutum]	molecular function: binding (GO:0005488)
Gh_A03G169100	229	TOR1L4	--	--	--	--	--	--	0.132674	-0.951613	normal	0.000581826	-2.62657	down	0.180665	-0.598437	normal	0.00538115	-1.42104	down	0.423844	-0.33083	normal	0.00294625	-1.59116	down		0.179238	1.19239	normal	0.0355663	3.44796	up	--	--	--	9.14001e-08	1.82836	up	0.00200536	2.26483	up	Cellular Component: microtubule (GO:0005874);; Molecular Function: microtubule binding (GO:0008017);;	--	--	HEAT repeats	TORTIFOLIA1-like protein 4 OS=Arabidopsis thaliana OX=3702 GN=TOR1L4 PE=2 SV=1	hypothetical protein ES332_A03G172700v1 [Gossypium tomentosum]	cellular component: cell (GO:0005623);; cellular component: organelle (GO:0043226);; cellular component: organelle part (GO:0044422);; cellular component: cell part (GO:0044464);; cellular component: supramolecular complex (GO:0099080);; molecular function: binding (GO:0005488)
Gh_A03G170000	230	WAK2	0.27367	-0.441083	normal	0.234717	-0.314401	normal	2.15522e-06	-1.78901	down	1.58601e-09	-6.74328	down	0.014281	0.555823	normal	0.704564	-0.124225	normal	1.79176e-09	-1.43729	down	5.26546e-13	-2.06905	down		0.130638	0.521882	normal	1.4797e-07	1.52315	up	0.0465754	0.691375	normal	0.0217484	0.885697	normal	2.42733e-05	5.21635	up	Molecular Function: polysaccharide binding (GO:0030247);;	--	--	Wall-associated receptor kinase galacturonan-binding	--	PREDICTED: wall-associated receptor kinase-like 10 [Gossypium raimondii]	molecular function: binding (GO:0005488)
Gh_A03G170700	231	Prkab2	0.00808496	0.516358	normal	0.000224543	0.640257	normal	6.96049e-20	1.31531	up	2.96454e-12	1.47967	up	0.357794	0.270842	normal	2.2403e-05	0.97928	normal	7.84667e-11	1.29596	up	1.04565e-12	1.42417	up		0.00345906	-0.818851	normal	5.97805e-09	-1.05953	down	0.0109009	-0.499918	normal	2.18828e-09	-0.829011	normal	2.70139e-06	-0.845675	normal	Biological Process: polysaccharide biosynthetic process (GO:0000271);; Molecular Function: pattern binding (GO:0001871);; Molecular Function: molecular_function (GO:0003674);; Molecular Function: binding (GO:0005488);; Cellular Component: cellular_component (GO:0005575);; Cellular Component: intracellular (GO:0005622);; Cellular Component: cell (GO:0005623);; Cellular Component: cytoplasm (GO:000…	K19720|2.6e-07|mng:MNEG_1488|K19720 collagen type III alpha | (RefSeq) SNF1-related protein kinase regulatory subunit beta-2	--	Glycogen recognition site of AMP-activated protein kinase	Protein PTST homolog 2, chloroplastic OS=Arabidopsis thaliana OX=3702 GN=PTST2 PE=1 SV=1	PREDICTED: uncharacterized protein LOC107886645 [Gossypium hirsutum]	biological process: metabolic process (GO:0008152);; biological process: single-organism process (GO:0044699);; molecular function: binding (GO:0005488);; cellular component: cell (GO:0005623);; cellular component: cell part (GO:0044464);; biological process: cellular process (GO:0009987);; biological process: biological regulation (GO:0065007);; cellular component: organelle (GO:0043226)
Gh_A03G173700	232	At1g68400	--	--	--	--	--	--	0.84686	0.200534	normal	--	--	--	0.0161443	-1.36794	down	0.00167347	-2.94075	down	0.00977209	-1.7031	down	0.00683975	-1.75563	down		0.837344	0.551747	normal	--	--	--	--	--	--	0.0233275	-1.31541	down	--	--	--	Molecular Function: protein kinase activity (GO:0004672);; Molecular Function: ATP binding (GO:0005524);; Cellular Component: integral component of membrane (GO:0016021);;	K20359|9.1e-53|eus:EUTSA_v10006389mg|K20359 PRA1 family protein 1 | (RefSeq) hypothetical protein	--	Protein kinase domain	Probable leucine-rich repeat receptor-like protein kinase At1g68400 OS=Arabidopsis thaliana OX=3702 GN=At1g68400 PE=1 SV=1	PREDICTED: probable leucine-rich repeat receptor-like protein kinase At1g68400 [Gossypium hirsutum]	biological process: metabolic process (GO:0008152);; biological process: cellular process (GO:0009987);; molecular function: catalytic activity (GO:0003824);; molecular function: binding (GO:0005488);; cellular component: membrane (GO:0016020);; cellular component: membrane part (GO:0044425)
Gh_A03G174700	233	At5g13110	0.0477256	-0.742006	normal	0.937385	-0.0377928	normal	0.236331	0.42315	normal	0.443277	0.336759	normal	8.35943e-14	-1.10819	down	0.968239	0.00808093	normal	0.0783586	-0.280736	normal	0.550861	-0.111074	normal		0.476484	0.442217	normal	0.793352	0.0849768	normal	0.0545604	0.467928	normal	0.0831247	-0.260829	normal	0.932445	0.0162583	normal	Molecular Function: glucose-6-phosphate dehydrogenase activity (GO:0004345);; Biological Process: glucose metabolic process (GO:0006006);; Biological Process: pentose-phosphate shunt (GO:0006098);; Molecular Function: NADP binding (GO:0050661);;	K00036|0.0e+00|ghi:107886719|K00036 glucose-6-phosphate 1-dehydrogenase [EC:1.1.1.49 1.1.1.363] | (RefSeq) glucose-6-phosphate 1-dehydrogenase, chloroplastic-like	Pentose phosphate pathway (ko00030);; Glutathione metabolism (ko00480);; Carbon metabolism (ko01200)	Glucose-6-phosphate dehydrogenase, C-terminal domain	Glucose-6-phosphate 1-dehydrogenase, chloroplastic OS=Nicotiana tabacum OX=4097 PE=2 SV=1	PREDICTED: glucose-6-phosphate 1-dehydrogenase, chloroplastic-like [Gossypium hirsutum]	biological process: metabolic process (GO:0008152);; biological process: single-organism process (GO:0044699);; molecular function: catalytic activity (GO:0003824);; biological process: cellular process (GO:0009987);; molecular function: binding (GO:0005488)
Gh_A03G176200	234	At4g18596	0.270844	-0.496591	normal	0.481187	-0.341784	normal	1.36238e-09	-2.61932	down	6.33282e-11	-10.2193	down	2.45556e-05	-1.10882	down	8.90172e-14	-2.37253	down	1.62823e-22	-3.29658	down	2.40372e-22	-2.95008	down		0.851314	0.183507	normal	0.308709	-0.42622	normal	1.13122e-05	-1.85982	down	0.423821	-0.481555	normal	8.55709e-06	7.47469	up	--	--	--	Pollen protein Ole e 1 like	--	hypothetical protein ES319_A03G163500v1 [Gossypium barbadense]	--
Gh_A03G176400	235	GDPD1	0.315587	0.791542	normal	0.0397703	1.49763	up	9.46876e-07	2.76263	up	3.1613e-07	3.71661	up	0.000316907	1.78568	up	--	--	--	3.7204e-07	2.01359	up	2.12117e-35	4.06014	up		--	--	--	0.893841	-0.0886022	normal	5.54867e-06	-2.08358	down	1.4934e-15	-1.80917	down	0.010116	-0.697861	normal	Biological Process: lipid metabolic process (GO:0006629);; Molecular Function: phosphoric diester hydrolase activity (GO:0008081);;	K18696|9.3e-220|gab:108484687|K18696 glycerophosphodiester phosphodiesterase [EC:3.1.4.46] | (RefSeq) glycerophosphodiester phosphodiesterase GDPD1, chloroplastic-like	Glycerophospholipid metabolism (ko00564)	Glycerophosphoryl diester phosphodiesterase family	Glycerophosphodiester phosphodiesterase GDPD1, chloroplastic OS=Arabidopsis thaliana OX=3702 GN=GDPD1 PE=1 SV=1	PREDICTED: glycerophosphodiester phosphodiesterase GDPD1, chloroplastic-like [Gossypium arboreum]	biological process: metabolic process (GO:0008152);; biological process: single-organism process (GO:0044699);; molecular function: catalytic activity (GO:0003824)
Gh_A03G181000	236	E6	--	--	--	--	--	--	--	--	--	0.000144061	-4.2042	down	0.000384435	-1.44236	down	1.10739e-07	-2.58398	down	0.000470976	-1.29739	down	1.9583e-15	-6.0119	down		0.0012899	1.25952	up	--	--	--	--	--	--	--	--	--	--	--	--	--	--	--	--	--	PREDICTED: protein E6-like [Gossypium hirsutum]	--
Gh_A03G183100	237	Gh_A03G183100	--	--	--	--	--	--	--	--	--	--	--	--	1.25426e-07	-2.81834	down	8.45748e-12	-4.03473	down	3.52473e-10	-4.09848	down	4.98437e-11	-4.73573	down		0.897257	-0.637333	normal	--	--	--	--	--	--	--	--	--	--	--	--	--	--	--	--	--	PREDICTED: uncharacterized protein LOC107886778 [Gossypium hirsutum]	--
Gh_A03G183400	238	CALS12	0.291625	0.258827	normal	0.00019706	0.407282	normal	1.95957e-24	1.18999	up	3.56321e-23	2.22804	up	0.13443	-0.305732	normal	0.000451792	0.80067	normal	0.414684	0.147427	normal	0.0257609	0.413174	normal		2.67404e-05	-0.818554	normal	1.34201e-12	-1.37631	down	0.0643708	-0.446497	normal	7.0264e-56	-1.85382	down	8.36759e-38	-2.60462	down	Cellular Component: 1,3-beta-D-glucan synthase complex (GO:0000148);; Molecular Function: 1,3-beta-D-glucan synthase activity (GO:0003843);; Cellular Component: plasma membrane (GO:0005886);; Biological Process: (1->3)-beta-D-glucan biosynthetic process (GO:0006075);; Cellular Component: integral component of membrane (GO:0016021);; Molecular Function: glucosyltransferase activity (GO:0046527);;	K11000|0.0e+00|ghi:107886774|K11000 callose synthase [EC:2.4.1.-] | (RefSeq) callose synthase 12-like	--	1,3-beta-glucan synthase component	Callose synthase 12 OS=Arabidopsis thaliana OX=3702 GN=CALS12 PE=2 SV=1	PREDICTED: callose synthase 12-like [Gossypium hirsutum]	cellular component: cell (GO:0005623);; cellular component: membrane (GO:0016020);; cellular component: macromolecular complex (GO:0032991);; cellular component: membrane part (GO:0044425);; cellular component: cell part (GO:0044464);; molecular function: catalytic activity (GO:0003824);; biological process: metabolic process (GO:0008152);; biological process: cellular process (GO:0009987);; biol…
Gh_A03G183800	239	yfiP	0.203566	-0.978771	normal	0.748602	-0.241023	normal	0.930194	-0.0569417	normal	0.0293787	-1.77757	down	0.000346447	-1.38753	down	0.0292243	-0.849543	normal	0.698575	0.144837	normal	9.02251e-05	-1.87139	down		0.649588	0.583295	normal	--	--	--	0.950177	-0.0482365	normal	0.00382754	0.807005	normal	--	--	--	--	--	--	DTW domain	--	PREDICTED: uncharacterized protein LOC107886771 [Gossypium hirsutum]	--
Gh_A03G184300	240	PLT4	0.126596	-3.81203	normal	0.16685	-1.81496	normal	3.30502e-05	-4.92995	down	5.93014e-07	-8.49956	down	0.0177404	-1.19156	down	2.07361e-06	-3.50063	down	0.0679326	-2.99102	normal	4.87671e-12	-8.9169	down		0.934093	0.150816	normal	--	--	--	--	--	--	--	--	--	--	--	--	Cellular Component: integral component of membrane (GO:0016021);; Molecular Function: transmembrane transporter activity (GO:0022857);;	K08150|1.3e-65|egu:105051438|K08150 MFS transporter, SP family, solute carrier family 2 (myo-inositol transporter), member 13 | (RefSeq) inositol transporter 1	--	Sugar (and other) transporter	Probable polyol transporter 4 OS=Arabidopsis thaliana OX=3702 GN=PLT4 PE=2 SV=1	hypothetical protein ES332_A03G188500v1 [Gossypium tomentosum]	cellular component: membrane (GO:0016020);; cellular component: membrane part (GO:0044425);; biological process: localization (GO:0051179);; molecular function: transporter activity (GO:0005215)
Gh_A03G186500	241	sna41	--	--	--	--	--	--	--	--	--	--	--	--	0.000148564	-1.97545	down	6.40886e-13	-5.49121	down	4.16155e-10	-4.39649	down	2.16906e-12	-9.18863	down		0.930715	0.252048	normal	--	--	--	--	--	--	--	--	--	--	--	--	--	--	--	--	--	hypothetical protein ES319_A03G173500v1 [Gossypium barbadense]	--
Gh_A03G187700	242	CYCD6-1	--	--	--	0.0766083	2.57519	normal	0.0316669	3.95696	up	0.0381864	3.63015	up	0.0164102	2.14057	up	--	--	--	0.002594	3.61783	up	9.1298e-05	3.26714	up		--	--	--	0.227701	0.630335	normal	0.129524	-0.811328	normal	0.00667026	-0.475424	normal	0.0681466	-0.487283	normal	Cellular Component: nucleus (GO:0005634);; Cellular Component: host cell nucleus (GO:0042025);; Biological Process: regulation of cell cycle (GO:0051726);;	K18812|2.9e-160|gra:105794919|K18812 cyclin D6, plant | (RefSeq) putative cyclin-D6-1	--	Cyclin, N-terminal domain	Putative cyclin-D6-1 OS=Arabidopsis thaliana OX=3702 GN=CYCD6-1 PE=3 SV=1	PREDICTED: putative cyclin-D6-1 isoform X2 [Gossypium raimondii]	cellular component: cell (GO:0005623);; cellular component: organelle (GO:0043226);; cellular component: cell part (GO:0044464);; cellular component: other organism (GO:0044215);; cellular component: other organism part (GO:0044217);; biological process: biological regulation (GO:0065007)
Gh_A03G192400	243	PYRD	--	--	--	--	--	--	0.163718	1.42686	normal	0.816552	-0.3618	normal	0.0191731	-1.1336	down	0.0525309	-0.926529	normal	1.07131e-06	1.43959	up	0.340429	-0.402772	normal		0.926047	0.336312	normal	--	--	--	--	--	--	0.111875	0.383032	normal	0.549348	0.339054	normal	Molecular Function: dihydroorotate dehydrogenase activity (GO:0004152);; Cellular Component: mitochondrial inner membrane (GO:0005743);; Biological Process: 'de novo' pyrimidine nucleobase biosynthetic process (GO:0006207);; Biological Process: 'de novo' UMP biosynthetic process (GO:0044205);;	K00254|3.2e-259|gab:108474506|K00254 dihydroorotate dehydrogenase [EC:1.3.5.2] | (RefSeq) dihydroorotate dehydrogenase (quinone), mitochondrial	Pyrimidine metabolism (ko00240)	Dihydroorotate dehydrogenase	Dihydroorotate dehydrogenase (quinone), mitochondrial OS=Arabidopsis thaliana OX=3702 GN=PYRD PE=1 SV=2	PREDICTED: dihydroorotate dehydrogenase (quinone), mitochondrial [Gossypium arboreum]	biological process: metabolic process (GO:0008152);; biological process: single-organism process (GO:0044699);; molecular function: catalytic activity (GO:0003824);; cellular component: cell (GO:0005623);; cellular component: membrane (GO:0016020);; cellular component: organelle (GO:0043226);; cellular component: organelle part (GO:0044422);; cellular component: cell part (GO:0044464);; biologica…
Gh_A03G192600	244	TMEM53	0.110877	0.584169	normal	0.670574	0.197497	normal	1.36763e-79	4.2995	up	2.25411e-100	5.87444	up	1.45967e-05	-1.27344	down	0.586014	0.164471	normal	0.515299	0.254296	normal	0.00163893	1.15416	up		0.00362746	1.21986	up	0.0541483	-0.628554	normal	2.92144e-05	1.16854	up	8.16423e-31	-2.8169	down	7.52299e-25	-3.47002	down	Cellular Component: integral component of membrane (GO:0016021);;	--	--	Eukaryotic protein of unknown function (DUF829)	--	PREDICTED: transmembrane protein 53-like [Gossypium hirsutum]	cellular component: membrane (GO:0016020);; cellular component: membrane part (GO:0044425)
Gh_A03G192900	245	At5g08350	--	--	--	--	--	--	--	--	--	--	--	--	0.0046234	-1.24612	down	0.00202752	-1.80605	down	5.66131e-08	-2.73631	down	1.69112e-07	-2.38522	down		0.041747	1.1035	up	--	--	--	--	--	--	--	--	--	--	--	--	--	--	--	GRAM domain	GEM-like protein 4 OS=Arabidopsis thaliana OX=3702 GN=At5g08350 PE=2 SV=1	hypothetical protein ES319_A03G181200v1 [Gossypium barbadense]	--
Gh_A03G193900	246	TOM40-1	0.104058	-0.876094	normal	0.846433	-0.0995409	normal	0.00416021	1.03112	up	0.253991	0.572341	normal	0.224528	-0.343396	normal	0.138135	-0.386757	normal	4.53958e-05	0.72481	normal	0.47381	-0.169738	normal		0.0493749	0.979315	normal	2.29527e-05	1.51937	up	0.0241586	0.673024	normal	7.894e-05	0.69203	normal	0.326782	0.270475	normal	Cellular Component: mitochondrial outer membrane (GO:0005741);; Molecular Function: protein transmembrane transporter activity (GO:0008320);; Biological Process: protein import into mitochondrial matrix (GO:0030150);;	K11518|2.2e-179|ghi:107886867|K11518 mitochondrial import receptor subunit TOM40 | (RefSeq) mitochondrial import receptor subunit TOM40-1-like	--	Eukaryotic porin	Mitochondrial import receptor subunit TOM40-1 OS=Arabidopsis thaliana OX=3702 GN=TOM40-1 PE=1 SV=3	PREDICTED: mitochondrial import receptor subunit TOM40-1-like [Gossypium hirsutum]	cellular component: cell (GO:0005623);; cellular component: membrane (GO:0016020);; cellular component: organelle (GO:0043226);; cellular component: organelle part (GO:0044422);; cellular component: cell part (GO:0044464);; biological process: localization (GO:0051179);; molecular function: transporter activity (GO:0005215);; biological process: single-organism process (GO:0044699)
Gh_A03G196300	247	HMG2	0.0799204	-1.52767	normal	0.23605	-1.14315	normal	0.00137091	2.02728	up	0.0108632	2.16507	up	0.000179187	-1.73915	down	0.000477942	-1.47208	down	0.844082	-0.0791427	normal	0.301654	-0.445246	normal		0.928526	-0.228476	normal	0.600636	-0.446209	normal	0.546441	-0.579256	normal	2.45508e-42	-2.30379	down	9.72862e-19	-2.79953	down	Molecular Function: hydroxymethylglutaryl-CoA reductase (NADPH) activity (GO:0004420);; Cellular Component: peroxisomal membrane (GO:0005778);; Cellular Component: endoplasmic reticulum membrane (GO:0005789);; Biological Process: isoprenoid biosynthetic process (GO:0008299);; Biological Process: coenzyme A metabolic process (GO:0015936);; Cellular Component: integral component of membrane (GO:001…	K00021|0.0e+00|ghi:107939235|K00021 hydroxymethylglutaryl-CoA reductase (NADPH) [EC:1.1.1.34] | (RefSeq) 3-hydroxy-3-methylglutaryl-coenzyme A reductase 1-like	Terpenoid backbone biosynthesis (ko00900)	Hydroxymethylglutaryl-coenzyme A reductase	3-hydroxy-3-methylglutaryl-coenzyme A reductase 1 OS=Gossypium hirsutum OX=3635 GN=HMG1 PE=3 SV=1	PREDICTED: 3-hydroxy-3-methylglutaryl-coenzyme A reductase 1-like [Gossypium hirsutum]	biological process: metabolic process (GO:0008152);; biological process: single-organism process (GO:0044699);; molecular function: catalytic activity (GO:0003824);; cellular component: cell (GO:0005623);; cellular component: membrane (GO:0016020);; cellular component: organelle (GO:0043226);; cellular component: organelle part (GO:0044422);; cellular component: cell part (GO:0044464);; cellular …
Gh_A03G198800	248	Xyl2	--	--	--	--	--	--	--	--	--	--	--	--	9.16271e-06	-2.32999	down	1.76438e-05	-2.64512	down	1.1778e-09	-3.5816	down	1.23308e-10	-4.37716	down		0.601976	0.812488	normal	--	--	--	--	--	--	--	--	--	--	--	--	Molecular Function: hydrolase activity, hydrolyzing O-glycosyl compounds (GO:0004553);; Biological Process: carbohydrate metabolic process (GO:0005975);;	K15920|0.0e+00|gab:108476039|K15920 xylan 1,4-beta-xylosidase [EC:3.2.1.37] | (RefSeq) beta-xylosidase/alpha-L-arabinofuranosidase 2	Amino sugar and nucleotide sugar metabolism (ko00520)	Glycosyl hydrolase family 3 C-terminal domain	Beta-xylosidase/alpha-L-arabinofuranosidase 2 OS=Medicago sativa subsp. varia OX=36902 GN=Xyl2 PE=2 SV=1	PREDICTED: beta-xylosidase/alpha-L-arabinofuranosidase 2 [Gossypium arboreum]	molecular function: catalytic activity (GO:0003824);; biological process: metabolic process (GO:0008152)
Gh_A03G200300	249	poxN1	--	--	--	--	--	--	--	--	--	1.46507e-05	-7.54507	down	0.00666092	-1.60154	down	3.5851e-11	-4.61201	down	0.000185933	-3.17442	down	3.46062e-06	-3.63605	down		0.118349	1.02681	normal	--	--	--	--	--	--	--	--	--	--	--	--	Molecular Function: peroxidase activity (GO:0004601);; Cellular Component: extracellular region (GO:0005576);; Biological Process: response to oxidative stress (GO:0006979);; Molecular Function: heme binding (GO:0020037);; Biological Process: hydrogen peroxide catabolic process (GO:0042744);; Molecular Function: metal ion binding (GO:0046872);;	K00430|3.7e-185|ghi:107908967|K00430 peroxidase [EC:1.11.1.7] | (RefSeq) peroxidase N1-like	Phenylpropanoid biosynthesis (ko00940)	Peroxidase	Peroxidase N1 OS=Nicotiana tabacum OX=4097 GN=poxN1 PE=1 SV=1	bacterial-induced peroxidase [Gossypium tomentosum]	biological process: metabolic process (GO:0008152);; biological process: cellular process (GO:0009987);; biological process: single-organism process (GO:0044699);; biological process: response to stimulus (GO:0050896);; biological process: detoxification (GO:0098754);; molecular function: catalytic activity (GO:0003824);; molecular function: antioxidant activity (GO:0016209);; cellular component:…
Gh_A03G203400	250	AGP1	--	--	--	--	--	--	--	--	--	--	--	--	0.00220389	-1.73918	down	5.55076e-06	-2.25677	down	0.000454814	-1.44065	down	5.17551e-11	-3.57908	down		0.811354	0.452142	normal	--	--	--	--	--	--	0.0581996	0.789932	normal	--	--	--	--	--	--	--	--	hypothetical protein ES332_A03G210300v1 [Gossypium tomentosum]	--
Gh_A03G205800	251	ULP2B	--	--	--	--	--	--	--	--	--	--	--	--	5.72161e-05	1.98551	up	--	--	--	3.07567e-07	2.33914	up	--	--	--		--	--	--	0.0963157	0.912465	normal	--	--	--	0.0838435	0.771313	normal	--	--	--	Molecular Function: cysteine-type peptidase activity (GO:0008234);;	K08596|0.0e+00|gra:105795118|K08596 sentrin-specific protease 7 [EC:3.4.22.68] | (RefSeq) probable ubiquitin-like-specific protease 2A	--	Ulp1 protease family, C-terminal catalytic domain	Probable ubiquitin-like-specific protease 2B OS=Arabidopsis thaliana OX=3702 GN=ULP2B PE=1 SV=3	PREDICTED: probable ubiquitin-like-specific protease 2A isoform X3 [Gossypium raimondii]	biological process: metabolic process (GO:0008152);; molecular function: catalytic activity (GO:0003824)
Gh_A03G211200	252	rplA	--	--	--	--	--	--	4.68783e-06	2.97394	up	0.0434285	1.98986	up	0.00988475	-1.14054	down	0.0302179	-0.9838	normal	2.13334e-13	1.93931	up	0.835601	-0.086464	normal		0.168691	1.60048	normal	--	--	--	--	--	--	0.00516797	0.590432	normal	0.222402	-0.43718	normal	Biological Process: maturation of LSU-rRNA (GO:0000470);; Molecular Function: RNA binding (GO:0003723);; Molecular Function: structural constituent of ribosome (GO:0003735);; Biological Process: translation (GO:0006412);; Cellular Component: cytosolic large ribosomal subunit (GO:0022625);;	K02863|5.0e-43|mtr:MTR_0059s0060|K02863 large subunit ribosomal protein L1 | (RefSeq) 50S ribosomal protein L1p	Ribosome (ko03010)	Ribosomal protein L1p/L10e family	50S ribosomal protein L1, chloroplastic OS=Spinacia oleracea OX=3562 GN=RPL1 PE=1 SV=1	PREDICTED: 50S ribosomal protein L1-like [Gossypium hirsutum]	biological process: metabolic process (GO:0008152);; biological process: cellular process (GO:0009987);; biological process: cellular component organization or biogenesis (GO:0071840);; molecular function: binding (GO:0005488);; molecular function: structural molecule activity (GO:0005198);; cellular component: cell (GO:0005623);; cellular component: macromolecular complex (GO:0032991);; cellular…
Gh_A03G211900	253	ZAT10	0.31728	0.557969	normal	0.746269	-0.222609	normal	1.2055e-10	2.98031	up	1.38681e-18	4.93186	up	9.11654e-09	1.58412	up	4.05749e-25	2.92224	up	5.78566e-23	2.73185	up	8.54462e-74	4.60562	up		0.00151619	-1.95637	down	6.6128e-05	-0.923687	normal	0.00185537	1.16224	up	1.09193e-24	-2.208	down	1.41887e-33	-2.26317	down	Biological Process: response to acid chemical (GO:0001101);; Molecular Function: molecular_function (GO:0003674);; Molecular Function: nucleic acid binding (GO:0003676);; Molecular Function: DNA binding (GO:0003677);; Molecular Function: transcription factor activity, sequence-specific DNA binding (GO:0003700);; Molecular Function: binding (GO:0005488);; Cellular Component: cellular_component (GO…	--	--	C2H2-type zinc finger	Zinc finger protein ZAT10 OS=Arabidopsis thaliana OX=3702 GN=ZAT10 PE=2 SV=1	zinc finger protein ZAT10-like [Gossypium hirsutum]	biological process: response to stimulus (GO:0050896);; molecular function: binding (GO:0005488);; biological process: biological regulation (GO:0065007);; molecular function: nucleic acid binding transcription factor activity (GO:0001071);; cellular component: cell (GO:0005623);; cellular component: cell part (GO:0044464);; cellular component: organelle (GO:0043226);; biological process: metabol…
Gh_A03G214800	254	MYB44	0.653593	-0.312866	normal	0.00771866	0.970364	normal	5.69954e-06	1.58904	up	0.410289	0.393444	normal	1.41307e-23	-3.07335	down	7.56676e-05	-2.55045	down	1.56981e-08	-1.58028	down	0.00375089	-1.10123	down		2.5899e-13	2.49372	up	--	--	--	0.309384	-1.04069	normal	0.0212747	-0.671318	normal	0.0443318	1.02241	up	Molecular Function: DNA binding (GO:0003677);; Cellular Component: nucleus (GO:0005634);;	K09422|1.2e-132|gab:108475474|K09422 transcription factor MYB, plant | (RefSeq) transcription factor MYB44-like	--	Myb-like DNA-binding domain	Transcription factor MYB73 OS=Arabidopsis thaliana OX=3702 GN=MYB73 PE=1 SV=1	PREDICTED: transcription factor MYB44-like [Gossypium hirsutum]	molecular function: binding (GO:0005488);; cellular component: cell (GO:0005623);; cellular component: organelle (GO:0043226);; cellular component: cell part (GO:0044464)
Gh_A03G215500	255	CYCD3-1	--	--	--	--	--	--	--	--	--	--	--	--	0.0246299	-1.50345	down	--	--	--	0.000490295	-2.1613	down	--	--	--		0.991576	-0.0954957	normal	--	--	--	--	--	--	--	--	--	--	--	--	Biological Process: regulation of cyclin-dependent protein serine/threonine kinase activity (GO:0000079);; Cellular Component: cyclin-dependent protein kinase holoenzyme complex (GO:0000307);; Cellular Component: nucleus (GO:0005634);; Cellular Component: cytoplasm (GO:0005737);; Molecular Function: cyclin-dependent protein serine/threonine kinase regulator activity (GO:0016538);; Cellular Compon…	K14505|2.1e-216|ghi:107934998|K14505 cyclin D3, plant | (RefSeq) cyclin-D3-3-like	Plant hormone signal transduction (ko04075)	Cyclin, N-terminal domain	Cyclin-D3-3 OS=Arabidopsis thaliana OX=3702 GN=CYCD3-3 PE=2 SV=1	PREDICTED: cyclin-D3-3-like [Gossypium hirsutum]	biological process: biological regulation (GO:0065007);; cellular component: cell (GO:0005623);; cellular component: macromolecular complex (GO:0032991);; cellular component: cell part (GO:0044464);; cellular component: organelle (GO:0043226);; molecular function: molecular function regulator (GO:0098772);; cellular component: other organism (GO:0044215);; cellular component: other organism part …
Gh_A03G217300	256	GAT1	0.00366501	0.749612	normal	0.513256	0.208261	normal	0.00379632	0.755744	normal	3.85867e-06	1.24045	up	0.000780579	1.00382	up	0.0100439	0.869545	normal	1.29025e-06	1.16393	up	1.04365e-06	1.53283	up		0.323892	-0.465824	normal	0.559497	-0.206982	normal	0.746685	0.174549	normal	0.859925	-0.0485064	normal	0.701797	-0.145655	normal	Biological Process: cell redox homeostasis (GO:0045454);;	K03671|1.5e-89|ghi:107908900|K03671 thioredoxin 1 | (RefSeq) thioredoxin M3, chloroplastic-like	--	Thioredoxin	Thioredoxin M3, chloroplastic OS=Arabidopsis thaliana OX=3702 GN=GAT1 PE=2 SV=2	PREDICTED: thioredoxin M3, chloroplastic-like isoform X2 [Gossypium hirsutum]	biological process: cellular process (GO:0009987);; biological process: single-organism process (GO:0044699);; biological process: biological regulation (GO:0065007)
Gh_A03G217800	257	CYP707A4	0.427335	0.497709	normal	0.0596861	-1.17752	normal	2.43565e-11	-2.86558	down	0.831455	-0.125102	normal	0.00218136	-0.962393	normal	1.27352e-13	-1.81079	down	2.15081e-34	-3.08574	down	0.100472	-0.779136	normal		0.288936	-0.746139	normal	0.00125084	-2.19671	down	0.00948285	-1.39676	down	0.00128058	-0.967002	normal	0.0901552	-1.37758	normal	Molecular Function: monooxygenase activity (GO:0004497);; Molecular Function: iron ion binding (GO:0005506);; Molecular Function: oxidoreductase activity, acting on paired donors, with incorporation or reduction of molecular oxygen (GO:0016705);; Molecular Function: heme binding (GO:0020037);;	K09843|2.5e-275|ghi:107935002|K09843 (+)-abscisic acid 8'-hydroxylase [EC:1.14.14.137] | (RefSeq) abscisic acid 8'-hydroxylase 4-like isoform X1	Carotenoid biosynthesis (ko00906)	Cytochrome P450	Abscisic acid 8'-hydroxylase 4 OS=Arabidopsis thaliana OX=3702 GN=CYP707A4 PE=2 SV=2	hypothetical protein E1A91_A03G207900v1 [Gossypium mustelinum]	biological process: metabolic process (GO:0008152);; biological process: single-organism process (GO:0044699);; molecular function: catalytic activity (GO:0003824);; molecular function: binding (GO:0005488)
Gh_A03G223200	258	At4g34480	0.00187981	-0.837835	normal	3.57612e-06	-0.880151	normal	0.623358	-0.109385	normal	1.69687e-12	-2.57384	down	0.0690097	0.182058	normal	4.6824e-08	-1.16008	down	0.000271577	0.569142	normal	4.4317e-20	-0.793144	normal		0.0889183	0.363182	normal	1.19549e-12	1.38672	up	0.900307	0.064262	normal	9.70187e-09	1.05457	up	1.13022e-13	2.1701	up	Molecular Function: hydrolase activity, hydrolyzing O-glycosyl compounds (GO:0004553);; Biological Process: carbohydrate metabolic process (GO:0005975);;	K19891|3.3e-91|lja:Lj6g3v0423710.1|K19891 glucan endo-1,3-beta-glucosidase 1/2/3 [EC:3.2.1.39] | (RefSeq) Lj6g3v0423710.1; -	Starch and sucrose metabolism (ko00500)	Glycosyl hydrolases family 17	Glucan endo-1,3-beta-glucosidase 7 OS=Arabidopsis thaliana OX=3702 GN=At4g34480 PE=1 SV=2	hypothetical protein ES288_A03G235300v1 [Gossypium darwinii]	molecular function: catalytic activity (GO:0003824);; biological process: metabolic process (GO:0008152)
Gh_A03G229800	259	Gh_A03G229800	0.0236822	-0.966262	normal	6.71005e-09	-2.5	down	4.44337e-13	-8.28564	down	1.80468e-07	-8.19513	down	2.44728e-12	-1.57842	down	3.86849e-13	-2.87317	down	1.83521e-38	-6.49952	down	1.81953e-26	-3.00601	down		0.253936	0.544201	normal	0.922022	-0.0641553	normal	--	--	--	--	--	--	--	--	--	Biological Process: response to auxin (GO:0009733);;	K14488|1.0e-36|gra:105784859|K14488 SAUR family protein | (RefSeq) auxin-induced protein 15A-like	Plant hormone signal transduction (ko04075)	Auxin responsive protein	Auxin-induced protein 15A OS=Glycine max OX=3847 PE=2 SV=1	hypothetical protein ES319_A03G215900v1 [Gossypium barbadense]	biological process: response to stimulus (GO:0050896)
Gh_A03G229900	260	Os09g0528100	--	--	--	--	--	--	--	--	--	--	--	--	0.0129831	-1.05265	down	6.78148e-05	-1.64633	down	0.000185219	-1.66468	down	8.71941e-07	-2.02308	down		0.0962792	0.831686	normal	--	--	--	--	--	--	--	--	--	--	--	--	Cellular Component: ribosome (GO:0005840);; Cellular Component: plastid (GO:0009536);; Biological Process: plastid translation (GO:0032544);;	K19033|7.9e-45|ghi:107927974|K19033 30S ribosomal protein S31 | (RefSeq) 30S ribosomal protein S31, mitochondrial	--	Ribosomal protein S31e	30S ribosomal protein S31, mitochondrial OS=Arabidopsis thaliana OX=3702 GN=At2g21290 PE=1 SV=1	PREDICTED: 30S ribosomal protein S31, mitochondrial [Gossypium hirsutum]	cellular component: cell (GO:0005623);; cellular component: macromolecular complex (GO:0032991);; cellular component: organelle (GO:0043226);; cellular component: cell part (GO:0044464);; biological process: metabolic process (GO:0008152);; biological process: cellular process (GO:0009987);; biological process: cellular component organization or biogenesis (GO:0071840)
Gh_A03G230200	261	Gh_A03G230200	0.264645	-0.613473	normal	1.9487e-08	-2.66353	down	3.75027e-24	-5.27219	down	2.7327e-10	-9.96113	down	2.2069e-05	-1.02139	down	5.22915e-23	-3.10291	down	8.6127e-43	-4.00569	down	1.64857e-21	-3.5402	down		0.60536	0.37853	normal	0.976382	-0.0229632	normal	--	--	--	--	--	--	--	--	--	Biological Process: response to auxin (GO:0009733);;	K14488|2.4e-40|gab:108465758|K14488 SAUR family protein | (RefSeq) auxin-induced protein 15A-like	Plant hormone signal transduction (ko04075)	Auxin responsive protein	Auxin-induced protein 15A OS=Glycine max OX=3847 PE=2 SV=1	PREDICTED: auxin-induced protein 15A-like [Gossypium hirsutum]	biological process: response to stimulus (GO:0050896)
Gh_A03G236200	262	Gh_A03G236200	--	--	--	--	--	--	--	--	--	9.9473e-07	-8.01005	down	0.00178504	-1.74086	down	2.81576e-06	-2.34413	down	3.99672e-11	-8.60582	down	4.24244e-10	-8.22912	down		0.980952	-0.0394524	normal	--	--	--	--	--	--	--	--	--	--	--	--	Cellular Component: integral component of membrane (GO:0016021);;	--	--	--	--	PREDICTED: uncharacterized protein LOC107927846 [Gossypium hirsutum]	cellular component: membrane (GO:0016020);; cellular component: membrane part (GO:0044425)
Gh_A03G236600	263	SAUR66	0.287574	-0.881076	normal	0.00202846	-1.73615	down	5.35048e-11	-6.79895	down	7.53006e-08	-8.72494	down	3.62258e-05	-1.7955	down	7.38529e-25	-4.64156	down	9.70205e-19	-7.88352	down	6.12346e-24	-5.67299	down		0.0434362	0.958256	normal	0.977731	0.0412253	normal	--	--	--	--	--	--	--	--	--	Biological Process: response to auxin (GO:0009733);;	K14488|7.6e-10|qsu:112003572|K14488 SAUR family protein | (RefSeq) uncharacterized protein LOC112003572 isoform X1	Plant hormone signal transduction (ko04075)	Auxin responsive protein	Auxin-responsive protein SAUR67 OS=Arabidopsis thaliana OX=3702 GN=SAUR67 PE=2 SV=1	hypothetical protein B456_N012200 [Gossypium raimondii]	biological process: response to stimulus (GO:0050896)
Gh_A03G237000	264	SAUR66	0.26784	0.495567	normal	0.269307	-0.34958	normal	7.71007e-24	-6.28913	down	2.84777e-10	-9.64818	down	6.00327e-05	-1.07185	down	2.88088e-12	-3.03247	down	3.26679e-48	-6.85009	down	3.90899e-15	-3.17256	down		9.27861e-05	1.23098	up	0.523732	-0.331135	normal	0.0110714	-1.46597	down	--	--	--	--	--	--	Biological Process: response to auxin (GO:0009733);;	K14488|1.4e-08|atr:18440739|K14488 SAUR family protein | (RefSeq) LOW QUALITY PROTEIN: auxin-responsive protein SAUR50	Plant hormone signal transduction (ko04075)	Auxin responsive protein	Auxin-responsive protein SAUR67 OS=Arabidopsis thaliana OX=3702 GN=SAUR67 PE=2 SV=1	PREDICTED: auxin-responsive protein SAUR62-like [Gossypium hirsutum]	biological process: response to stimulus (GO:0050896)
Gh_A03G238900	265	Gpat3	0.0405995	-0.898387	normal	0.81404	0.128013	normal	0.687892	0.149516	normal	2.4704e-05	-2.6246	down	0.404464	0.310674	normal	0.919498	-0.0606351	normal	0.0679189	0.489545	normal	0.13502	-0.487809	normal		0.83624	-0.189916	normal	0.011245	1.02313	up	0.655669	-0.396275	normal	0.593137	0.159849	normal	0.00129859	1.97143	up	Cellular Component: integral component of membrane (GO:0016021);; Molecular Function: transferase activity, transferring acyl groups (GO:0016746);;	K13506|2.7e-224|ghi:107939384|K13506 glycerol-3-phosphate O-acyltransferase 3/4 [EC:2.3.1.15] | (RefSeq) glycerol-3-phosphate acyltransferase 3-like	Glycerolipid metabolism (ko00561);; Glycerophospholipid metabolism (ko00564)	Acyltransferase	Glycerol-3-phosphate acyltransferase 9 OS=Arabidopsis thaliana OX=3702 GN=GPAT9 PE=1 SV=1	PREDICTED: glycerol-3-phosphate acyltransferase 3-like [Gossypium hirsutum]	cellular component: membrane (GO:0016020);; cellular component: membrane part (GO:0044425);; molecular function: catalytic activity (GO:0003824)
Gh_A03G240700	266	SGS3	--	--	--	--	--	--	0.667293	0.26936	normal	0.224776	0.806091	normal	4.45495e-05	-2.91455	down	0.0557576	-2.00466	normal	0.995928	-0.00327025	normal	0.00311925	-1.82324	down		0.798995	0.32562	normal	--	--	--	--	--	--	0.91098	0.0740877	normal	0.00339435	-2.2628	down	Biological Process: gene silencing by RNA (GO:0031047);;	--	--	XS domain	Protein SUPPRESSOR OF GENE SILENCING 3 OS=Solanum lycopersicum OX=4081 GN=SGS3 PE=1 SV=1	PREDICTED: protein SUPPRESSOR OF GENE SILENCING 3-like [Gossypium hirsutum]	biological process: cellular process (GO:0009987);; biological process: single-organism process (GO:0044699);; biological process: biological regulation (GO:0065007)
Gh_A03G241700	267	Gh_A03G241700	0.697362	-0.236853	normal	0.74722	-0.203447	normal	0.328923	0.469537	normal	0.00109639	1.74259	up	0.0356499	-1.07839	down	0.225556	-0.678363	normal	0.254001	-0.564348	normal	0.231924	0.555362	normal		0.964451	0.100204	normal	0.143168	-0.728216	normal	0.597524	-0.389622	normal	0.00225722	-0.92852	normal	0.000406175	-1.06382	down	--	--	--	Organ specific protein	--	PREDICTED: organ-specific protein P4-like [Gossypium hirsutum]	--
Gh_A03G242300	268	Gh_A03G242300	--	--	--	0.0393234	-3.39406	down	--	--	--	4.75424e-07	-9.91908	down	0.0173956	-2.86232	down	2.28988e-15	-7.36575	down	0.000217985	-5.14967	down	6.64038e-15	-10.2562	down		0.989957	0.0644155	normal	--	--	--	--	--	--	--	--	--	--	--	--	--	--	--	--	--	PREDICTED: uncharacterized protein LOC107938844 isoform X2 [Gossypium hirsutum]	--
Gh_A03G242900	269	Gh_A03G242900	0.65459	-0.255782	normal	0.000133749	1.32066	up	0.258603	0.310675	normal	7.81353e-11	-2.61567	down	1.706e-21	-1.77982	down	3.70901e-05	-2.04033	down	4.99619e-06	-0.849225	normal	1.03256e-11	-1.39822	down		1.56792e-09	1.3663	up	0.819357	-0.154415	normal	0.0339811	-2.00481	down	0.370233	0.215712	normal	6.92699e-12	2.60923	up	--	--	--	Protein of unknown function (DUF1005)	--	hypothetical protein ES288_A03G256900v1 [Gossypium darwinii]	--
Gh_A03G243100	270	ARI2	--	--	--	0.881143	-0.0868312	normal	0.820811	-0.114633	normal	0.205587	-0.789254	normal	0.0315448	0.823427	normal	0.000627526	1.36094	up	0.447141	0.318942	normal	0.319174	0.38543	normal		0.933864	-0.130149	normal	0.00480437	1.0579	up	0.00195473	1.29592	up	0.449291	0.305	normal	0.0259377	1.06538	up	Molecular Function: ubiquitin-protein transferase activity (GO:0004842);; Molecular Function: metal ion binding (GO:0046872);;	K11968|8.2e-296|ghi:107938877|K11968 ariadne-1 [EC:2.3.2.31] | (RefSeq) probable E3 ubiquitin-protein ligase ARI2 isoform X1	--	IBR domain, a half RING-finger domain	Probable E3 ubiquitin-protein ligase ARI2 OS=Arabidopsis thaliana OX=3702 GN=ARI2 PE=2 SV=1	PREDICTED: probable E3 ubiquitin-protein ligase ARI2 isoform X2 [Gossypium hirsutum]	molecular function: catalytic activity (GO:0003824);; molecular function: binding (GO:0005488)
Gh_A03G245000	271	Os11g0156000	--	--	--	--	--	--	0.0285113	2.50692	up	--	--	--	0.347227	0.670684	normal	--	--	--	0.947768	0.0500939	normal	0.0261291	1.44664	up		--	--	--	0.000100964	2.3674	up	--	--	--	4.88724e-05	-1.30371	down	0.189196	0.923342	normal	Molecular Function: DNA binding (GO:0003677);; Cellular Component: nucleus (GO:0005634);;	--	--	B3 DNA binding domain	--	hypothetical protein ES319_1Z189600v1 [Gossypium barbadense]	molecular function: binding (GO:0005488);; cellular component: cell (GO:0005623);; cellular component: organelle (GO:0043226);; cellular component: cell part (GO:0044464)
Gh_A03G248200	272	Gh_A03G248200	0.234763	-0.705015	normal	--	--	--	0.447196	0.385766	normal	0.899371	-0.0979787	normal	0.110773	0.54006	normal	3.49626e-09	-3.16661	down	0.23991	-0.443226	normal	0.319428	0.347904	normal		0.75997	0.346438	normal	1.40039e-05	1.60072	up	--	--	--	0.215822	-0.47083	normal	0.115348	0.819845	normal	--	--	--	--	--	PREDICTED: uncharacterized protein LOC107938523 [Gossypium hirsutum]	--
Gh_A03G248900	273	MCM6	--	--	--	0.346245	-2.63659	normal	--	--	--	0.000659919	-10.4489	down	3.85459e-05	-3.43638	down	3.6797e-06	-6.00007	down	5.48119e-29	-6.04405	down	1.28365e-11	-9.40587	down		0.933864	0.478696	normal	--	--	--	--	--	--	--	--	--	--	--	--	Molecular Function: DNA binding (GO:0003677);; Molecular Function: DNA helicase activity (GO:0003678);; Molecular Function: ATP binding (GO:0005524);; Cellular Component: nucleus (GO:0005634);; Biological Process: DNA replication initiation (GO:0006270);; Cellular Component: MCM complex (GO:0042555);;	K02542|0.0e+00|gab:108479944|K02542 DNA replication licensing factor MCM6 [EC:3.6.4.12] | (RefSeq) DNA replication licensing factor MCM6 isoform X1	DNA replication (ko03030)	MCM P-loop domain	DNA replication licensing factor MCM6 OS=Arabidopsis thaliana OX=3702 GN=MCM6 PE=1 SV=1	hypothetical protein ES319_A03G235000v1 [Gossypium barbadense]	molecular function: binding (GO:0005488);; molecular function: catalytic activity (GO:0003824);; cellular component: cell (GO:0005623);; cellular component: organelle (GO:0043226);; cellular component: cell part (GO:0044464);; biological process: metabolic process (GO:0008152);; biological process: cellular process (GO:0009987);; cellular component: macromolecular complex (GO:0032991)
Gh_A04G001900	274	nuoN	--	--	--	--	--	--	--	--	--	0.000104652	-5.75792	down	2.0901e-06	-2.54372	down	1.26065e-15	-5.93416	down	0.00863123	-5.60382	down	5.51581e-12	-9.09849	down		0.942863	-0.227465	normal	--	--	--	--	--	--	--	--	--	--	--	--	Cellular Component: integral component of membrane (GO:0016021);;	--	--	--	--	PREDICTED: uncharacterized protein LOC107931190 [Gossypium hirsutum]	cellular component: membrane (GO:0016020);; cellular component: membrane part (GO:0044425)
Gh_A04G003600	275	HIPP47	--	--	--	--	--	--	--	--	--	--	--	--	0.0735082	0.79288	normal	--	--	--	--	--	--	--	--	--		--	--	--	3.50459e-10	3.11398	up	--	--	--	--	--	--	--	--	--	--	--	--	--	Heavy metal-associated isoprenylated plant protein 16 OS=Arabidopsis thaliana OX=3702 GN=HIPP16 PE=2 SV=1	PREDICTED: uncharacterized protein LOC107931139 isoform X1 [Gossypium hirsutum]	--
Gh_A04G005500	276	At5g55950	0.0316601	0.742762	normal	0.897972	0.0540948	normal	0.478717	-0.17403	normal	0.671143	-0.153138	normal	5.51524e-10	1.05316	up	0.00275868	0.464186	normal	0.0151224	-0.432102	normal	0.150065	-0.247639	normal		0.931504	-0.0669215	normal	0.503467	0.246791	normal	0.39011	0.322303	normal	0.115497	-0.311027	normal	0.653684	-0.129208	normal	Molecular Function: nucleotide-sugar transmembrane transporter activity (GO:0005338);; Molecular Function: UDP-xylose transmembrane transporter activity (GO:0005464);; Cellular Component: Golgi apparatus (GO:0005794);; Molecular Function: antiporter activity (GO:0015297);; Cellular Component: integral component of membrane (GO:0016021);; Molecular Function: transmembrane transporter activity (GO:…	K15285|2.2e-35|ghi:107963028|K15285 solute carrier family 35, member E3 | (RefSeq) uncharacterized protein LOC107963028	--	Triose-phosphate Transporter family	Nucleotide-sugar uncharacterized transporter 2 OS=Arabidopsis thaliana OX=3702 GN=At5g55950 PE=2 SV=1	PREDICTED: uncharacterized membrane protein At1g06890-like [Gossypium hirsutum]	biological process: single-organism process (GO:0044699);; biological process: localization (GO:0051179);; molecular function: transporter activity (GO:0005215);; cellular component: cell (GO:0005623);; cellular component: organelle (GO:0043226);; cellular component: cell part (GO:0044464);; cellular component: membrane (GO:0016020);; cellular component: membrane part (GO:0044425)
Gh_A04G007700	277	RLP12	--	--	--	--	--	--	--	--	--	--	--	--	5.83701e-27	2.89098	up	0.389069	0.479515	normal	8.89511e-06	1.70519	up	0.741167	-0.162072	normal		--	--	--	1.9233e-18	11.0792	up	--	--	--	1.65256e-15	10.1415	up	1.27966e-06	7.81052	up	Cellular Component: integral component of membrane (GO:0016021);;	K03131|1.8e-38|ghi:107956070|K03131 transcription initiation factor TFIID subunit 6 | (RefSeq) transcription initiation factor TFIID subunit 6b-like	Basal transcription factors (ko03022)	Leucine rich repeat	Receptor-like protein 35 OS=Arabidopsis thaliana OX=3702 GN=RLP35 PE=3 SV=1	PREDICTED: receptor-like protein 12 [Gossypium hirsutum]	cellular component: membrane (GO:0016020);; cellular component: membrane part (GO:0044425)
Gh_A04G011400	278	GDPDL3	0.795741	-0.0802747	normal	0.090625	-0.391083	normal	4.36069e-08	-1.20711	down	0.741593	0.129935	normal	3.32263e-13	-0.678849	normal	0.176637	0.25348	normal	8.37974e-27	-1.23405	down	5.49192e-27	-1.29147	down		0.0883939	-0.497692	normal	9.80377e-16	-1.08775	down	0.685666	0.12558	normal	1.65281e-05	-0.521243	normal	1.29121e-14	-1.89362	down	Biological Process: lipid metabolic process (GO:0006629);; Molecular Function: glycerophosphodiester phosphodiesterase activity (GO:0008889);;	K01126|4.1e-25|nnu:104597936|K01126 glycerophosphoryl diester phosphodiesterase [EC:3.1.4.46] | (RefSeq) glycerophosphodiester phosphodiesterase GDPD6-like	Glycerophospholipid metabolism (ko00564)	Glycerophosphoryl diester phosphodiesterase family	Glycerophosphodiester phosphodiesterase GDPDL1 OS=Arabidopsis thaliana OX=3702 GN=GDPDL1 PE=1 SV=2	PREDICTED: glycerophosphodiester phosphodiesterase GDPDL3-like isoform X1 [Gossypium hirsutum]	biological process: metabolic process (GO:0008152);; biological process: single-organism process (GO:0044699);; molecular function: catalytic activity (GO:0003824)
Gh_A04G013400	279	Gh_A04G013400	--	--	--	--	--	--	--	--	--	--	--	--	0.00060434	-1.43674	down	3.10106e-07	-2.99875	down	0.00258476	-1.73463	down	3.19108e-06	-4.07232	down		0.409766	0.751594	normal	--	--	--	--	--	--	--	--	--	--	--	--	Molecular Function: sulfotransferase activity (GO:0008146);;	K22321|5.2e-61|eus:EUTSA_v10008073mg|K22321 aliphatic desulfoglucosinolate sulfotransferase [EC:2.8.2.38] | (RefSeq) hypothetical protein	Glucosinolate biosynthesis (ko00966)	Sulfotransferase domain	Flavonol sulfotransferase-like OS=Flaveria bidentis OX=4224 PE=2 SV=1	PREDICTED: flavonol sulfotransferase-like [Gossypium hirsutum]	molecular function: catalytic activity (GO:0003824)
Gh_A04G018300	280	At3g14460	--	--	--	--	--	--	--	--	--	0.0480183	2.83978	up	0.00355151	1.4742	up	0.0167588	1.28977	up	0.187567	0.728381	normal	8.12826e-07	2.18157	up		--	--	--	0.114414	0.739543	normal	0.0273071	1.21105	up	0.0622136	0.837534	normal	0.331746	-0.291314	normal	--	--	--	--	--	PREDICTED: disease resistance protein TAO1-like [Gossypium hirsutum]	--
Gh_A04G019800	281	At1g28570	0.00158132	-1.27612	down	0.0254284	-1.90753	down	2.11448e-70	-7.04359	down	9.36065e-33	-6.34961	down	4.62859e-06	-2.29098	down	1.63481e-06	-2.41795	down	3.35679e-09	-2.99686	down	0.899306	-0.0650209	normal	-1.01485	2.63411e-33	-4.91535	down	6.38548e-69	-5.91082	down	9.62106e-12	-5.43777	down	--	--	--	0.0199899	1.39357	up	Molecular Function: hydrolase activity, acting on ester bonds (GO:0016788);;	K01206|7.0e-45|eus:EUTSA_v10018726mg|K01206 alpha-L-fucosidase [EC:3.2.1.51] | (RefSeq) hypothetical protein	Other glycan degradation (ko00511)	GDSL-like Lipase/Acylhydrolase	GDSL esterase/lipase At1g28570 OS=Arabidopsis thaliana OX=3702 GN=At1g28570 PE=3 SV=1	PREDICTED: GDSL esterase/lipase At1g28570-like isoform X1 [Gossypium hirsutum]	molecular function: catalytic activity (GO:0003824)
Gh_A04G021000	282	TOR1	0.0895059	-1.47813	normal	0.532043	-0.447701	normal	0.51154	-0.358556	normal	1.07446e-07	-8.62312	down	0.0234287	-0.809862	normal	0.000683509	-1.66138	down	0.109583	-0.392203	normal	1.3798e-10	-4.22425	down		0.0431665	0.955795	normal	0.0438923	1.6226	up	0.832767	-0.272983	normal	0.0102051	0.938592	normal	--	--	--	Biological Process: multicellular organism development (GO:0007275);; Molecular Function: microtubule binding (GO:0008017);; Biological Process: unidimensional cell growth (GO:0009826);; Cellular Component: cortical microtubule, transverse to long axis (GO:0010005);; Biological Process: circumnutation (GO:0010031);;	--	--	HEAT repeats	Microtubule-associated protein TORTIFOLIA1 OS=Arabidopsis thaliana OX=3702 GN=TOR1 PE=1 SV=2	PREDICTED: microtubule-associated protein TORTIFOLIA1-like isoform X1 [Gossypium hirsutum]	biological process: multicellular organismal process (GO:0032501);; biological process: developmental process (GO:0032502);; biological process: single-organism process (GO:0044699);; molecular function: binding (GO:0005488);; biological process: cellular process (GO:0009987);; biological process: growth (GO:0040007);; biological process: cellular component organization or biogenesis (GO:0071840)…
Gh_A04G023300	283	At2g25060	0.9011	-0.0600787	normal	0.0388514	-0.749725	normal	0.0439257	-0.672452	normal	5.26793e-07	-4.80429	down	2.71507e-09	0.975443	normal	0.143823	-0.56188	normal	3.65179e-05	-0.929445	normal	2.53814e-09	-2.10488	down		0.129789	0.47683	normal	5.35524e-09	1.51765	up	0.296933	0.648522	normal	0.510109	0.233263	normal	0.00384456	3.19066	up	Molecular Function: electron carrier activity (GO:0009055);;	--	--	Plastocyanin-like domain	Early nodulin-like protein 3 OS=Arabidopsis thaliana OX=3702 GN=At5g25090 PE=2 SV=2	hypothetical protein ES288_A04G027300v1 [Gossypium darwinii]	molecular function: electron carrier activity (GO:0009055)
Gh_A04G025700	284	RAT5	0.00969197	-0.835903	normal	0.000355531	-1.13517	down	0.0893734	0.514555	normal	0.000189503	1.26546	up	3.06381e-08	-1.41916	down	1.02665e-07	-1.48135	down	0.000454615	-0.888555	normal	0.232461	-0.366003	normal		0.694202	0.33871	normal	0.339168	-0.238437	normal	0.946186	-0.0285279	normal	1.59127e-10	-1.05087	down	2.53171e-09	-1.2616	down	Cellular Component: nucleosome (GO:0000786);; Molecular Function: DNA binding (GO:0003677);; Cellular Component: nucleus (GO:0005634);; Molecular Function: protein heterodimerization activity (GO:0046982);;	K11251|3.2e-66|dzi:111275732|K11251 histone H2A | (RefSeq) histone H2A.6-like	--	C-terminus of histone H2A	Probable histone H2A.2 OS=Oryza sativa subsp. indica OX=39946 GN=OsI_025469 PE=3 SV=1	PREDICTED: histone H2A.6-like [Gossypium raimondii]	cellular component: cell (GO:0005623);; cellular component: macromolecular complex (GO:0032991);; cellular component: organelle (GO:0043226);; cellular component: organelle part (GO:0044422);; cellular component: cell part (GO:0044464);; molecular function: binding (GO:0005488)
Gh_A04G026100	285	Gh_A04G026100	--	--	--	--	--	--	--	--	--	--	--	--	0.000435642	-4.88746	down	2.60466e-14	-10.2461	down	5.1987e-05	-7.00536	down	1.04338e-14	-10.3195	down		0.945546	0.393156	normal	--	--	--	--	--	--	--	--	--	--	--	--	Molecular Function: magnesium ion binding (GO:0000287);; Molecular Function: terpene synthase activity (GO:0010333);;	K14183|1.4e-306|gra:105768276|K14183 (+)-delta-cadinene synthase [EC:4.2.3.13] | (RefSeq) (+)-delta-cadinene synthase isozyme XC14-like	Sesquiterpenoid and triterpenoid biosynthesis (ko00909)	Terpene synthase family, metal binding domain	(+)-delta-cadinene synthase isozyme XC14 OS=Gossypium arboreum OX=29729 PE=2 SV=1	hypothetical protein E1A91_A04G026400v1 [Gossypium mustelinum]	molecular function: binding (GO:0005488);; molecular function: catalytic activity (GO:0003824)
Gh_A04G026700	286	CAD1-C2	--	--	--	0.875391	-0.439102	normal	0.0280686	-3.33232	down	2.93441e-05	-11.0336	down	0.000556549	-2.75773	down	2.33265e-27	-5.40019	down	0.0704521	-2.54267	normal	2.54585e-07	-2.53223	down		0.964799	0.234076	normal	--	--	--	--	--	--	0.558998	1.06306	normal	7.38031e-08	8.77956	up	Molecular Function: magnesium ion binding (GO:0000287);; Molecular Function: terpene synthase activity (GO:0010333);;	K14183|0.0e+00|ghi:107920690|K14183 (+)-delta-cadinene synthase [EC:4.2.3.13] | (RefSeq) (+)-delta-cadinene synthase isozyme C2-like	Sesquiterpenoid and triterpenoid biosynthesis (ko00909)	Terpene synthase family, metal binding domain	(+)-delta-cadinene synthase isozyme C2 OS=Gossypium arboreum OX=29729 GN=CAD1-C2 PE=2 SV=1	PREDICTED: (+)-delta-cadinene synthase isozyme C2-like [Gossypium hirsutum]	molecular function: binding (GO:0005488);; molecular function: catalytic activity (GO:0003824)
Gh_A04G030100	287	At4g19050	--	--	--	--	--	--	0.000170955	1.76675	up	1.72353e-05	2.63072	up	4.91779e-05	1.65241	up	0.00126958	1.33918	up	0.0617958	0.818681	normal	3.08331e-09	2.15243	up		--	--	--	0.0305681	1.15204	up	0.0925962	0.695213	normal	0.40742	-0.290314	normal	0.640596	0.192227	normal	Cellular Component: cellular_component (GO:0005575);; Cellular Component: intracellular (GO:0005622);; Cellular Component: cell (GO:0005623);; Cellular Component: cytoplasm (GO:0005737);; Cellular Component: cytosol (GO:0005829);; Cellular Component: plasma membrane (GO:0005886);; Biological Process: response to stress (GO:0006950);; Biological Process: defense response (GO:0006952);; Biological …	K13459|6.7e-126|gra:105768344|K13459 disease resistance protein RPS2 | (RefSeq) probable disease resistance protein At1g61300	Plant-pathogen interaction (ko04626)	--	--	hypothetical protein E1A91_A04G032400v1 [Gossypium mustelinum]	cellular component: cell (GO:0005623);; cellular component: cell part (GO:0044464);; cellular component: membrane (GO:0016020);; biological process: response to stimulus (GO:0050896);; biological process: cellular process (GO:0009987);; biological process: biological regulation (GO:0065007);; biological process: signaling (GO:0023052)
Gh_A04G037500	288	VQ4	0.696112	-0.231818	normal	0.471196	-0.434669	normal	3.78127e-06	1.595	up	9.76929e-05	1.84514	up	0.000712363	0.985554	normal	0.755145	-0.117214	normal	9.45907e-14	1.71778	up	2.17176e-08	1.44756	up		0.99295	0.0144014	normal	5.12908e-05	1.23339	up	0.641398	0.308849	normal	0.487995	0.151015	normal	0.20591	-0.350985	normal	--	--	--	VQ motif	VQ motif-containing protein 4 OS=Arabidopsis thaliana OX=3702 GN=VQ4 PE=1 SV=1	PREDICTED: VQ motif-containing protein 4-like [Gossypium arboreum]	--
Gh_A04G038100	289	PSKR2	0.0653073	0.731528	normal	0.0098792	1.14658	up	2.26755e-72	3.75071	up	1.7299e-62	3.77864	up	1.4966e-05	1.3489	up	8.98768e-15	2.24755	up	1.78061e-27	2.65775	up	2.3572e-14	2.29825	up		0.901189	-0.157003	normal	0.201956	0.464065	normal	0.02377	0.921798	normal	3.04791e-18	-1.24101	down	3.87594e-15	-1.6154	down	Molecular Function: protein serine/threonine kinase activity (GO:0004674);; Molecular Function: ATP binding (GO:0005524);; Cellular Component: integral component of membrane (GO:0016021);;	K13415|9.1e-76|pavi:110744703|K13415 protein brassinosteroid insensitive 1 [EC:2.7.10.1 2.7.11.1] | (RefSeq) systemin receptor SR160	Plant hormone signal transduction (ko04075)	Leucine rich repeat	Phytosulfokine receptor 2 OS=Arabidopsis thaliana OX=3702 GN=PSKR2 PE=1 SV=1	PREDICTED: phytosulfokine receptor 2-like [Gossypium hirsutum]	biological process: metabolic process (GO:0008152);; biological process: cellular process (GO:0009987);; molecular function: catalytic activity (GO:0003824);; molecular function: binding (GO:0005488);; cellular component: membrane (GO:0016020);; cellular component: membrane part (GO:0044425)
Gh_A04G043800	290	At3g03300	0.99639	0.0030426	normal	0.51742	-0.310547	normal	0.681665	-0.177269	normal	0.520852	-0.288887	normal	0.399786	0.271644	normal	0.0194239	-0.919073	normal	1.11255e-05	-1.25121	down	0.0247157	-0.710222	normal		0.0814575	0.732762	normal	0.0338603	1.00359	up	0.912552	0.105786	normal	0.389267	-0.33204	normal	0.448144	0.341562	normal	Molecular Function: RNA binding (GO:0003723);; Molecular Function: ribonuclease III activity (GO:0004525);; Cellular Component: nucleus (GO:0005634);; Cellular Component: cytoplasm (GO:0005737);; Cellular Component: RISC complex (GO:0016442);; Biological Process: production of siRNA involved in RNA interference (GO:0030422);; Biological Process: RNA phosphodiester bond hydrolysis (GO:0090501);;	K11592|0.0e+00|ghi:107948746|K11592 endoribonuclease Dicer [EC:3.1.26.-] | (RefSeq) endoribonuclease Dicer homolog 2-like	--	Ribonuclease III domain	Endoribonuclease Dicer homolog 2 OS=Arabidopsis thaliana OX=3702 GN=At3g03300 PE=1 SV=2	PREDICTED: endoribonuclease Dicer homolog 2-like [Gossypium hirsutum]	molecular function: binding (GO:0005488);; biological process: metabolic process (GO:0008152);; biological process: cellular process (GO:0009987);; molecular function: catalytic activity (GO:0003824);; cellular component: cell (GO:0005623);; cellular component: organelle (GO:0043226);; cellular component: cell part (GO:0044464);; cellular component: macromolecular complex (GO:0032991);; biologica…
Gh_A04G046500	291	XA21	0.0428991	1.15074	up	0.701358	0.234433	normal	0.642745	0.289257	normal	--	--	--	2.70265e-10	2.1142	up	0.0369321	0.849719	normal	0.952642	0.0297337	normal	0.860372	0.0920478	normal	0.963454	0.587189	0.605843	normal	2.63447e-05	1.57625	up	0.000726918	1.20208	up	0.433028	0.345268	normal	0.000108028	2.18145	up	Molecular Function: protein kinase activity (GO:0004672);; Molecular Function: ATP binding (GO:0005524);; Cellular Component: integral component of membrane (GO:0016021);;	K13420|1.7e-188|gra:105766360|K13420 LRR receptor-like serine/threonine-protein kinase FLS2 [EC:2.7.11.1] | (RefSeq) probable LRR receptor-like serine/threonine-protein kinase At3g47570	MAPK signaling pathway - plant (ko04016);; Plant-pathogen interaction (ko04626)	Protein kinase domain	Receptor kinase-like protein Xa21 OS=Oryza sativa subsp. indica OX=39946 GN=XA21 PE=1 SV=1	hypothetical protein B456_009G370900 [Gossypium raimondii]	biological process: metabolic process (GO:0008152);; biological process: cellular process (GO:0009987);; molecular function: catalytic activity (GO:0003824);; molecular function: binding (GO:0005488);; cellular component: membrane (GO:0016020);; cellular component: membrane part (GO:0044425)
Gh_A04G053100	292	Gh_A04G053100	--	--	--	0.724011	-0.358261	normal	--	--	--	0.000830647	-3.84328	down	1.4007e-08	-2.12918	down	0.0006817	-4.54884	down	0.000335164	-4.99745	down	2.93926e-05	-5.13344	down		0.479245	1.0504	normal	0.000908275	1.69317	up	0.000511169	-3.15705	down	--	--	--	--	--	--	Molecular Function: magnesium ion binding (GO:0000287);; Cellular Component: plastid (GO:0009536);; Molecular Function: terpene synthase activity (GO:0010333);;	K18108|2.0e-184|vvi:100854267|K18108 (-)-alpha-terpineol synthase [EC:4.2.3.111] | (RefSeq) (-)-alpha-terpineol synthase-like	Monoterpenoid biosynthesis (ko00902)	Terpene synthase family, metal binding domain	Myrcene synthase, chloroplastic OS=Quercus ilex OX=58334 PE=1 SV=1	terpene synthase 10-like [Gossypium hirsutum]	molecular function: binding (GO:0005488);; cellular component: cell (GO:0005623);; cellular component: organelle (GO:0043226);; cellular component: cell part (GO:0044464);; molecular function: catalytic activity (GO:0003824)
Gh_A04G069400	293	Gh_A04G069400	6.39992e-06	-0.829292	normal	1.60003e-10	-1.31938	down	0.316593	0.185248	normal	0.245681	-0.284076	normal	4.79254e-05	-1.06115	down	3.88263e-16	-2.24806	down	0.000611103	-0.812791	normal	6.53808e-08	-1.33581	down		0.156421	0.579376	normal	0.235313	0.35783	normal	0.328118	-0.36721	normal	0.00622285	-0.411301	normal	0.0386002	-0.44364	normal	Molecular Function: ATP binding (GO:0005524);; Cellular Component: cytoplasm (GO:0005737);; Cellular Component: cytoskeleton (GO:0005856);;	K10355|1.1e-217|ghi:107948247|K10355 actin, other eukaryote | (RefSeq) actin-like	--	Actin	Actin OS=Gossypium hirsutum OX=3635 PE=3 SV=1	PREDICTED: actin-like [Gossypium hirsutum]	molecular function: binding (GO:0005488);; cellular component: cell (GO:0005623);; cellular component: cell part (GO:0044464);; cellular component: organelle (GO:0043226)
Gh_A04G081500	294	Gh_A04G081500	0.0030487	-0.967274	normal	2.5826e-05	-1.23161	down	0.00679575	-0.77842	normal	0.000102098	-1.44282	down	2.26677e-07	-1.1225	down	8.54136e-09	-1.30527	down	0.00546356	-0.523138	normal	2.9661e-08	-1.29236	down		0.38844	0.431381	normal	0.414312	0.280221	normal	0.310239	0.338135	normal	0.000461331	0.700865	normal	0.072847	0.612461	normal	Biological Process: ribosomal small subunit assembly (GO:0000028);; Biological Process: maturation of SSU-rRNA from tricistronic rRNA transcript (SSU-rRNA, 5.8S rRNA, LSU-rRNA) (GO:0000462);; Molecular Function: structural constituent of ribosome (GO:0003735);; Cellular Component: ribosome (GO:0005840);; Biological Process: translation (GO:0006412);; Molecular Function: mRNA 5'-UTR binding (GO:00…	K02955|1.3e-79|ghi:107948311|K02955 small subunit ribosomal protein S14e | (RefSeq) 40S ribosomal protein S14-like	Ribosome (ko03010)	Ribosomal protein S11	40S ribosomal protein S14 OS=Zea mays OX=4577 PE=3 SV=1	PREDICTED: 40S ribosomal protein S14-like [Gossypium hirsutum]	biological process: cellular process (GO:0009987);; biological process: cellular component organization or biogenesis (GO:0071840);; biological process: metabolic process (GO:0008152);; molecular function: structural molecule activity (GO:0005198);; cellular component: cell (GO:0005623);; cellular component: macromolecular complex (GO:0032991);; cellular component: organelle (GO:0043226);; cellul…
Gh_A04G081600	295	INV1	0.0471142	-0.990622	normal	4.88052e-12	-5.89768	down	2.74164e-05	-4.81997	down	0.00166403	-3.70468	down	0.0109324	-1.06742	down	5.47288e-15	-10.0665	down	6.55661e-20	-7.70007	down	6.41445e-07	-2.31967	down		0.0363817	1.03413	up	0.115131	0.959644	normal	--	--	--	--	--	--	--	--	--	Molecular Function: hydrolase activity, hydrolyzing O-glycosyl compounds (GO:0004553);; Biological Process: carbohydrate metabolic process (GO:0005975);;	K01193|0.0e+00|ghi:107948309|K01193 beta-fructofuranosidase [EC:3.2.1.26] | (RefSeq) beta-fructofuranosidase, insoluble isoenzyme 1-like	Galactose metabolism (ko00052);; Starch and sucrose metabolism (ko00500)	Glycosyl hydrolases family 32 N-terminal domain	Beta-fructofuranosidase, insoluble isoenzyme 1 OS=Daucus carota OX=4039 GN=INV1 PE=1 SV=1	hypothetical protein ES332_A04G093900v1 [Gossypium tomentosum]	molecular function: catalytic activity (GO:0003824);; biological process: metabolic process (GO:0008152)
Gh_A04G082600	296	SBEI	0.193166	-0.6122	normal	0.0672367	-1.09757	normal	0.129456	-0.573894	normal	0.0515562	-1.26306	normal	0.84169	0.0709198	normal	0.680229	-0.12653	normal	0.178405	0.328611	normal	0.359856	0.242613	normal		0.454987	0.485811	normal	0.000279991	1.17346	up	0.00573305	1.43735	up	1.30427e-09	1.40548	up	9.31415e-06	2.02742	up	Molecular Function: 1,4-alpha-glucan branching enzyme activity (GO:0003844);; Molecular Function: hydrolase activity, hydrolyzing O-glycosyl compounds (GO:0004553);; Cellular Component: cytoplasm (GO:0005737);; Biological Process: carbohydrate metabolic process (GO:0005975);; Biological Process: glycogen biosynthetic process (GO:0005978);; Biological Process: starch metabolic process (GO:0005982)…	K00700|0.0e+00|ghi:107948121|K00700 1,4-alpha-glucan branching enzyme [EC:2.4.1.18] | (RefSeq) 1,4-alpha-glucan-branching enzyme 2-2, chloroplastic/amyloplastic-like	Starch and sucrose metabolism (ko00500)	Alpha amylase, C-terminal all-beta domain	1,4-alpha-glucan-branching enzyme 1, chloroplastic/amyloplastic OS=Pisum sativum OX=3888 GN=SBEI PE=1 SV=1	PREDICTED: 1,4-alpha-glucan-branching enzyme 2-2, chloroplastic/amyloplastic-like [Gossypium hirsutum]	molecular function: catalytic activity (GO:0003824);; cellular component: cell (GO:0005623);; cellular component: cell part (GO:0044464);; biological process: metabolic process (GO:0008152);; biological process: cellular process (GO:0009987);; biological process: single-organism process (GO:0044699);; molecular function: binding (GO:0005488)
Gh_A04G087500	297	UGT73D1	--	--	--	--	--	--	--	--	--	--	--	--	0.0334613	1.36147	up	0.00878974	1.62719	up	--	--	--	--	--	--		--	--	--	0.631507	0.37406	normal	1.75294e-07	2.71706	up	0.400347	0.522465	normal	--	--	--	Molecular Function: UDP-glycosyltransferase activity (GO:0008194);; Cellular Component: intracellular membrane-bounded organelle (GO:0043231);;	K13496|1.0e-167|qsu:111982929|K13496 UDP-glucosyltransferase 73C [EC:2.4.1.-] | (RefSeq) UDP-glycosyltransferase 73C6-like	Zeatin biosynthesis (ko00908)	UDP-glucoronosyl and UDP-glucosyl transferase	UDP-glycosyltransferase 73D1 OS=Arabidopsis thaliana OX=3702 GN=UGT73D1 PE=3 SV=1	PREDICTED: UDP-glycosyltransferase 73D1-like [Gossypium hirsutum]	molecular function: catalytic activity (GO:0003824);; cellular component: cell (GO:0005623);; cellular component: organelle (GO:0043226);; cellular component: cell part (GO:0044464)
Gh_A04G093200	298	FTSHI1	0.556312	-0.259244	normal	0.0228205	0.709001	normal	0.578406	-0.193001	normal	0.117623	-0.825243	normal	2.8079e-05	1.83502	up	1.35862e-08	2.27724	up	0.00575063	1.23484	up	9.71689e-11	2.46019	up		0.000172372	-1.93349	down	0.779731	0.158171	normal	0.271981	-0.390968	normal	0.105051	-0.495893	normal	0.000720285	1.38103	up	Molecular Function: ATP binding (GO:0005524);;	K03798|2.4e-31|mis:MICPUN_104714|K03798 cell division protease FtsH [EC:3.4.24.-] | (RefSeq) FTSH2; aaa-metalloprotease chloroplast precursor	--	ATPase family associated with various cellular activities (AAA)	Probable inactive ATP-dependent zinc metalloprotease FTSHI 1, chloroplastic OS=Arabidopsis thaliana OX=3702 GN=FTSHI1 PE=1 SV=1	hypothetical protein ES332_A04G106200v1 [Gossypium tomentosum]	molecular function: binding (GO:0005488)
Gh_A04G096300	299	PP2C38	1.91932e-08	-1.48415	down	0.95282	-0.0213424	normal	0.000135098	-0.970555	normal	1.33081e-19	-3.30952	down	1.97167e-15	-2.45322	down	3.66018e-25	-3.92629	down	8.40815e-08	-1.36203	down	0.0413494	0.828359	normal	-0.969077	0.558505	-0.192545	normal	0.015698	-1.15856	down	5.15776e-22	-4.11286	down	0.0751329	-0.575937	normal	1.01057e-12	3.973	up	Molecular Function: protein serine/threonine phosphatase activity (GO:0004722);; Molecular Function: magnesium-dependent protein serine/threonine phosphatase activity (GO:0004724);; Molecular Function: metal ion binding (GO:0046872);;	K01102|9.6e-214|ghi:107948342|K01102 pyruvate dehydrogenase phosphatase [EC:3.1.3.43] | (RefSeq) probable protein phosphatase 2C 38	--	Protein phosphatase 2C	Probable protein phosphatase 2C 38 OS=Arabidopsis thaliana OX=3702 GN=PP2C38 PE=1 SV=1	PREDICTED: probable protein phosphatase 2C 38 [Gossypium hirsutum]	biological process: metabolic process (GO:0008152);; biological process: cellular process (GO:0009987);; molecular function: catalytic activity (GO:0003824);; molecular function: binding (GO:0005488)
Gh_A04G098200	300	SG1	--	--	--	--	--	--	2.81146e-06	2.80357	up	0.00190822	2.57212	up	9.16805e-07	-2.80483	down	5.3347e-05	-1.94867	down	7.9326e-07	1.44375	up	0.964987	0.0197957	normal		0.676682	0.690232	normal	--	--	--	--	--	--	0.000963385	-0.645036	normal	1.53264e-09	-1.82238	down	--	--	--	Tetratricopeptide repeat	protein SLOW GREEN 1, chloroplastic OS=Arabidopsis thaliana OX=3702 GN=SG1 PE=1 SV=1	PREDICTED: protein SLOW GREEN 1, chloroplastic-like [Gossypium hirsutum]	--
Gh_A04G098600	301	KIN5B	--	--	--	--	--	--	--	--	--	3.19529e-06	-8.8375	down	2.31837e-08	-3.90938	down	1.20413e-11	-9.12327	down	1.29669e-10	-4.53146	down	4.8915e-12	-9.19769	down		0.978644	0.0889927	normal	--	--	--	--	--	--	--	--	--	--	--	--	Molecular Function: microtubule motor activity (GO:0003777);; Molecular Function: ATP binding (GO:0005524);; Biological Process: microtubule-based movement (GO:0007018);; Molecular Function: microtubule binding (GO:0008017);;	K10398|0.0e+00|gab:108457735|K10398 kinesin family member 11 | (RefSeq) kinesin-like protein KIN-5B	--	Kinesin motor domain	Kinesin-like protein KIN-5B OS=Arabidopsis thaliana OX=3702 GN=KIN5B PE=2 SV=1	kinesin-related protein [Gossypium arboreum]	molecular function: catalytic activity (GO:0003824);; molecular function: binding (GO:0005488);; biological process: cellular process (GO:0009987);; biological process: single-organism process (GO:0044699)
Gh_A04G100500	302	Gh_A04G100500	--	--	--	--	--	--	0.0360965	-1.57081	down	0.00116669	-2.98978	down	4.71125e-07	-2.47575	down	1.69262e-08	-3.21065	down	6.3574e-05	-2.06777	down	5.05623e-09	-3.19544	down		0.459103	0.952856	normal	--	--	--	--	--	--	--	--	--	--	--	--	Cellular Component: nucleosome (GO:0000786);; Molecular Function: DNA binding (GO:0003677);; Cellular Component: nucleus (GO:0005634);; Biological Process: nucleosome assembly (GO:0006334);; Cellular Component: host cell nucleus (GO:0042025);; Molecular Function: protein heterodimerization activity (GO:0046982);;	K11254|7.1e-50|adu:107458448|K11254 histone H4 | (RefSeq) histone H4	--	Centromere kinetochore component CENP-T histone fold	Histone H4 variant TH011 OS=Triticum aestivum OX=4565 PE=3 SV=2	PREDICTED: uncharacterized protein LOC107825453 [Nicotiana tabacum]	cellular component: cell (GO:0005623);; cellular component: macromolecular complex (GO:0032991);; cellular component: organelle (GO:0043226);; cellular component: organelle part (GO:0044422);; cellular component: cell part (GO:0044464);; molecular function: binding (GO:0005488);; biological process: cellular process (GO:0009987);; biological process: cellular component organization or biogenesis …
Gh_A04G101900	303	KIN10B	--	--	--	0.00470788	-3.30357	down	--	--	--	0.000576474	-5.65375	down	1.57753e-09	-2.79056	down	2.74997e-05	-6.83268	down	0.00636312	-4.09154	down	3.78965e-19	-6.39626	down		0.988075	0.0795313	normal	--	--	--	--	--	--	--	--	--	--	--	--	Molecular Function: microtubule motor activity (GO:0003777);; Molecular Function: ATP binding (GO:0005524);; Cellular Component: microtubule (GO:0005874);; Biological Process: microtubule-based movement (GO:0007018);; Molecular Function: microtubule binding (GO:0008017);;	K10403|0.0e+00|ghi:107948900|K10403 kinesin family member 22 | (RefSeq) kinesin-like protein KIF22	--	Kinesin motor domain	Kinesin-like protein KIN-10B OS=Arabidopsis thaliana OX=3702 GN=KIN10B PE=2 SV=1	PREDICTED: kinesin-like protein KIF22 [Gossypium hirsutum]	molecular function: catalytic activity (GO:0003824);; molecular function: binding (GO:0005488);; cellular component: cell (GO:0005623);; cellular component: organelle (GO:0043226);; cellular component: organelle part (GO:0044422);; cellular component: cell part (GO:0044464);; cellular component: supramolecular complex (GO:0099080);; biological process: cellular process (GO:0009987);; biological p…
Gh_A04G106400	304	LAC7	--	--	--	--	--	--	--	--	--	--	--	--	7.5632e-07	-3.19957	down	1.10633e-10	-8.6668	down	3.37218e-12	-9.1149	down	4.47274e-11	-8.74182	down		0.810859	0.597029	normal	--	--	--	--	--	--	--	--	--	--	--	--	Molecular Function: ferroxidase activity (GO:0004322);; Molecular Function: copper ion binding (GO:0005507);; Cellular Component: plasma membrane (GO:0005886);; Biological Process: iron ion transport (GO:0006826);; Biological Process: lignin catabolic process (GO:0046274);; Cellular Component: apoplast (GO:0048046);; Molecular Function: hydroquinone:oxygen oxidoreductase activity (GO:0052716);; B…	K05909|0.0e+00|ghi:107948847|K05909 laccase [EC:1.10.3.2] | (RefSeq) laccase-7-like	--	Multicopper oxidase	Laccase-7 OS=Arabidopsis thaliana OX=3702 GN=LAC7 PE=2 SV=1	PREDICTED: laccase-7-like [Gossypium hirsutum]	biological process: metabolic process (GO:0008152);; biological process: single-organism process (GO:0044699);; molecular function: catalytic activity (GO:0003824);; molecular function: binding (GO:0005488);; cellular component: cell (GO:0005623);; cellular component: membrane (GO:0016020);; cellular component: cell part (GO:0044464);; biological process: localization (GO:0051179);; biological pr…
Gh_A04G111900	305	FAD7A-1	0.0703911	0.781232	normal	0.00323454	-1.01685	down	0.118455	-0.486055	normal	0.0482274	0.747766	normal	2.06725e-05	-0.830984	normal	6.02589e-11	-1.29513	down	2.33783e-11	-1.17315	down	2.13368e-11	-1.57163	down		0.864908	0.151743	normal	2.60555e-06	-1.4509	down	0.733867	-0.144942	normal	0.000385452	-0.532334	normal	1.04444e-17	-2.143	down	Biological Process: lipid metabolic process (GO:0006629);; Cellular Component: integral component of membrane (GO:0016021);; Molecular Function: oxidoreductase activity, acting on paired donors, with oxidation of a pair of donors resulting in the reduction of molecular oxygen to two molecules of water (GO:0016717);;	K10257|9.9e-274|ghi:107948941|K10257 acyl-lipid omega-3 desaturase [EC:1.14.19.25 1.14.19.35 1.14.19.36] | (RefSeq) omega-3 fatty acid desaturase, chloroplastic-like	--	Domain of unknown function (DUF3474)	Omega-3 fatty acid desaturase, chloroplastic OS=Sesamum indicum OX=4182 GN=FAD7 PE=2 SV=1	omega-3 fatty acid desaturase, chloroplastic-like [Gossypium hirsutum]	biological process: metabolic process (GO:0008152);; biological process: single-organism process (GO:0044699);; cellular component: membrane (GO:0016020);; cellular component: membrane part (GO:0044425);; molecular function: catalytic activity (GO:0003824)
Gh_A04G114000	306	MTH_273	--	--	--	3.96742e-09	2.78227	up	2.22923e-16	3.08062	up	7.17613e-16	3.97379	up	0.000291147	1.9721	up	0.000542842	1.52113	up	2.42235e-07	1.96293	up	2.25554e-18	3.14786	up		--	--	--	0.932556	0.092952	normal	0.0090177	-1.11652	down	0.000281802	-0.940412	normal	0.0978634	-0.631578	normal	--	--	--	Phosphatidylethanolamine-binding protein	--	PREDICTED: UPF0098 protein CPn_0877/CP_0992/CPj0877/CpB0906-like [Gossypium hirsutum]	--
Gh_A04G117100	307	GSTU18	0.80405	0.0809136	normal	0.600151	-0.116512	normal	1.18224e-09	-1.848	down	2.01499e-95	-4.25827	down	0.000116139	0.523048	normal	0.474806	-0.166661	normal	7.77079e-24	-1.36514	down	5.81145e-49	-2.96558	down		6.28889e-07	0.712197	normal	7.36755e-08	1.16005	up	0.0221639	0.639584	normal	3.88355e-06	1.20486	up	1.37625e-08	2.02944	up	Molecular Function: molecular_function (GO:0003674);; Molecular Function: catalytic activity (GO:0003824);; Molecular Function: glutathione transferase activity (GO:0004364);; Molecular Function: protein binding (GO:0005515);; Cellular Component: cellular_component (GO:0005575);; Cellular Component: intracellular (GO:0005622);; Cellular Component: cell (GO:0005623);; Cellular Component: cytoplasm…	K00799|1.3e-134|ghi:107948962|K00799 glutathione S-transferase [EC:2.5.1.18] | (RefSeq) glutathione S-transferase U17-like	Glutathione metabolism (ko00480)	Glutathione S-transferase, N-terminal domain	Glutathione S-transferase U17 OS=Arabidopsis thaliana OX=3702 GN=GSTU17 PE=2 SV=1	PREDICTED: glutathione S-transferase U17-like [Gossypium hirsutum]	molecular function: catalytic activity (GO:0003824);; molecular function: binding (GO:0005488);; cellular component: cell (GO:0005623);; cellular component: cell part (GO:0044464);; biological process: metabolic process (GO:0008152);; biological process: cellular process (GO:0009987);; biological process: response to stimulus (GO:0050896);; biological process: multicellular organismal process (GO…
Gh_A04G118900	308	ATJ16	0.0576268	-1.42648	normal	0.370014	-0.758814	normal	0.947896	0.0491734	normal	0.236193	-1.06278	normal	3.88627e-05	-1.78809	down	0.0193084	-1.23927	down	0.758157	0.114293	normal	0.00252001	-1.43498	down		0.943556	0.172649	normal	0.808161	-0.19048	normal	0.756505	-0.326135	normal	0.384545	0.260974	normal	0.812808	-0.160373	normal	Biological Process: response to acid chemical (GO:0001101);; Biological Process: biological_process (GO:0008150);; Biological Process: response to endogenous stimulus (GO:0009719);; Biological Process: response to hormone (GO:0009725);; Biological Process: response to abscisic acid (GO:0009737);; Biological Process: response to organic substance (GO:0010033);; Biological Process: response to lipi…	K14566|4.7e-20|aof:109844566|K14566 U3 small nucleolar RNA-associated protein 24 | (RefSeq) uncharacterized protein LOC109844566 isoform X1	Ribosome biogenesis in eukaryotes (ko03008)	DnaJ domain	Chaperone protein dnaJ 16 OS=Arabidopsis thaliana OX=3702 GN=ATJ16 PE=2 SV=1	hypothetical protein ES332_A04G133900v1 [Gossypium tomentosum]	biological process: response to stimulus (GO:0050896)
Gh_A04G123800	309	Gh_A04G123800	--	--	--	--	--	--	--	--	--	--	--	--	7.81473e-09	-4.71135	down	3.21417e-10	-8.89102	down	1.11184e-07	-4.47919	down	1.76773e-08	-7.07424	down		0.875881	-0.749641	normal	--	--	--	--	--	--	--	--	--	--	--	--	--	--	--	--	--	PREDICTED: uncharacterized protein LOC107948978 isoform X1 [Gossypium hirsutum]	--
Gh_A04G123900	310	Gh_A04G123900	--	--	--	0.0625077	-3.54032	normal	--	--	--	0.000782524	-7.60461	down	0.000351661	-3.33973	down	5.36245e-13	-4.62374	down	2.11095e-15	-4.39961	down	1.60296e-20	-6.40189	down		0.90236	-0.565272	normal	--	--	--	--	--	--	--	--	--	--	--	--	--	--	--	--	--	PREDICTED: uncharacterized protein LOC107948977 [Gossypium hirsutum]	--
Gh_A04G124600	311	STH-2	0.260202	-1.02893	normal	0.481804	-0.667322	normal	0.00155683	-1.70544	down	0.42257	-0.592292	normal	4.00432e-06	-1.86704	down	1.02715e-08	-1.74773	down	0.00462117	-2.16208	down	3.14713e-10	-1.6278	down		0.430093	1.13132	normal	0.296783	0.288832	normal	0.968098	0.0279751	normal	0.348062	0.705617	normal	0.452782	0.132589	normal	Molecular Function: protein phosphatase inhibitor activity (GO:0004864);; Biological Process: defense response (GO:0006952);; Biological Process: response to biotic stimulus (GO:0009607);; Biological Process: abscisic acid-activated signaling pathway (GO:0009738);; Molecular Function: abscisic acid binding (GO:0010427);; Molecular Function: signaling receptor activity (GO:0038023);;	--	--	Pathogenesis-related protein Bet v 1 family	Major pollen allergen Bet v 1-E OS=Betula pendula OX=3505 GN=BETV1E PE=1 SV=2	PREDICTED: pathogenesis-related protein STH-2-like [Gossypium raimondii]	biological process: biological regulation (GO:0065007);; molecular function: molecular function regulator (GO:0098772);; biological process: response to stimulus (GO:0050896);; biological process: cellular process (GO:0009987);; biological process: signaling (GO:0023052);; biological process: single-organism process (GO:0044699);; molecular function: binding (GO:0005488);; molecular function: sig…
Gh_A04G128900	312	RPL44	0.0208766	-0.704236	normal	2.4601e-05	-1.07805	down	0.019855	-0.648539	normal	0.000276154	-1.29865	down	7.43238e-06	-1.15059	down	3.59033e-10	-1.53222	down	0.000186915	-0.804877	normal	1.30982e-10	-1.79499	down		0.258743	0.43156	normal	0.990034	-0.00814771	normal	0.942248	-0.0418785	normal	0.30256	0.280489	normal	0.943204	-0.0376393	normal	Molecular Function: structural constituent of ribosome (GO:0003735);; Cellular Component: ribosome (GO:0005840);; Biological Process: translation (GO:0006412);;	K02929|1.0e-55|jre:108988531|K02929 large subunit ribosomal protein L44e | (RefSeq) 60S ribosomal protein L44 isoform X1	Ribosome (ko03010)	Ribosomal protein L44	60S ribosomal protein L44 OS=Gossypium hirsutum OX=3635 GN=RPL44 PE=3 SV=3	60S ribosomal protein L44-like [Gossypium australe]	molecular function: structural molecule activity (GO:0005198);; cellular component: cell (GO:0005623);; cellular component: macromolecular complex (GO:0032991);; cellular component: organelle (GO:0043226);; cellular component: cell part (GO:0044464);; biological process: metabolic process (GO:0008152);; biological process: cellular process (GO:0009987)
Gh_A04G135000	313	EXL5	0.000280057	-1.24044	down	0.000187493	1.14997	up	0.0879225	0.642581	normal	5.67254e-11	-3.80023	down	8.19559e-12	-1.93864	down	0.000182684	-1.77821	down	0.761069	0.0828393	normal	6.32858e-05	-1.93371	down	-0.698203	0.00054096	1.05297	up	0.516124	0.36689	normal	0.000426001	-1.89083	down	0.103864	0.494197	normal	0.000739271	2.93799	up	--	--	--	Phosphate-induced protein 1 conserved region	Protein EXORDIUM-like 5 OS=Arabidopsis thaliana OX=3702 GN=EXL5 PE=2 SV=1	hypothetical protein ES288_A04G150500v1 [Gossypium darwinii]	--
Gh_A04G135600	314	At3g43660	--	--	--	--	--	--	--	--	--	--	--	--	0.00762301	-2.34702	down	3.74398e-06	-2.44221	down	9.56137e-13	-4.53206	down	1.32967e-09	-4.64536	down		0.120168	1.19543	normal	--	--	--	--	--	--	--	--	--	--	--	--	Molecular Function: manganese ion transmembrane transporter activity (GO:0005384);; Cellular Component: integral component of membrane (GO:0016021);; Biological Process: cellular manganese ion homeostasis (GO:0030026);;	K22736|1.6e-110|gab:108459757|K22736 vacuolar iron transporter family protein | (RefSeq) vacuolar iron transporter homolog 2-like	--	VIT family	Vacuolar iron transporter homolog 2.1 OS=Arabidopsis thaliana OX=3702 GN=VTL5 PE=1 SV=1	PREDICTED: vacuolar iron transporter homolog 2-like [Gossypium arboreum]	biological process: localization (GO:0051179);; molecular function: transporter activity (GO:0005215);; cellular component: membrane (GO:0016020);; cellular component: membrane part (GO:0044425);; biological process: cellular process (GO:0009987);; biological process: single-organism process (GO:0044699);; biological process: biological regulation (GO:0065007)
Gh_A04G137200	315	AOMI	--	--	--	1.78069e-06	3.01536	up	2.55733e-40	6.01314	up	6.59553e-25	6.44196	up	0.000234428	1.66726	up	5.64989e-18	3.51558	up	7.0217e-10	3.69774	up	3.90279e-25	3.94241	up		--	--	--	0.000307628	1.69883	up	4.68997e-08	1.63106	up	1.26404e-08	-1.15402	down	1.53726e-22	-1.32017	down	Cellular Component: mitochondrion (GO:0005739);; Molecular Function: alternative oxidase activity (GO:0009916);; Biological Process: alternative respiration (GO:0010230);; Cellular Component: integral component of membrane (GO:0016021);; Molecular Function: metal ion binding (GO:0046872);; Cellular Component: respiratory chain (GO:0070469);; Molecular Function: ubiquinol:oxygen oxidoreductase act…	K17893|2.4e-195|ghi:107949133|K17893 ubiquinol oxidase [EC:1.10.3.11] | (RefSeq) ubiquinol oxidase, mitochondrial-like	--	Alternative oxidase	Ubiquinol oxidase 2, mitochondrial OS=Glycine max OX=3847 GN=AOX2 PE=1 SV=2	PREDICTED: ubiquinol oxidase, mitochondrial-like [Gossypium hirsutum]	cellular component: cell (GO:0005623);; cellular component: organelle (GO:0043226);; cellular component: cell part (GO:0044464);; biological process: metabolic process (GO:0008152);; biological process: single-organism process (GO:0044699);; molecular function: catalytic activity (GO:0003824);; biological process: cellular process (GO:0009987);; cellular component: membrane (GO:0016020);; cellula…
Gh_A04G140300	316	LECRK91	--	--	--	--	--	--	6.37358e-48	4.68407	up	3.40878e-68	5.89928	up	4.09173e-06	1.74141	up	--	--	--	7.53594e-06	1.77435	up	1.49282e-15	2.79339	up		--	--	--	4.14157e-10	2.27572	up	--	--	--	2.66956e-08	-1.17935	down	2.01071e-12	-1.35676	down	Biological Process: defense response to oomycetes (GO:0002229);; Molecular Function: transmembrane receptor protein serine/threonine kinase activity (GO:0004675);; Molecular Function: ATP binding (GO:0005524);; Cellular Component: plasma membrane (GO:0005886);; Biological Process: defense response (GO:0006952);; Cellular Component: integral component of membrane (GO:0016021);; Molecular Function:…	K22133|2.2e-86|egr:104443802|K22133 oxalate---CoA ligase [EC:6.2.1.8] | (RefSeq) oxalate--CoA ligase	Glyoxylate and dicarboxylate metabolism (ko00630)	Protein kinase domain	L-type lectin-domain containing receptor kinase IX.1 OS=Arabidopsis thaliana OX=3702 GN=LECRK91 PE=1 SV=1	PREDICTED: L-type lectin-domain containing receptor kinase IX.1-like [Gossypium arboreum]	biological process: response to stimulus (GO:0050896);; biological process: multi-organism process (GO:0051704);; biological process: metabolic process (GO:0008152);; biological process: cellular process (GO:0009987);; biological process: signaling (GO:0023052);; biological process: single-organism process (GO:0044699);; biological process: biological regulation (GO:0065007);; molecular function:…
Gh_A04G141300	317	CLPP6	0.00350084	-0.877105	normal	0.144704	-0.473321	normal	0.0642621	0.432541	normal	0.159424	0.442202	normal	8.00805e-08	-1.25259	down	1.43664e-05	-0.98098	normal	0.655643	0.0841783	normal	0.000710529	-0.814836	normal		0.75997	0.19178	normal	0.67008	-0.178871	normal	0.390918	-0.336846	normal	0.423894	-0.142916	normal	0.000347642	-1.03397	down	Molecular Function: serine-type endopeptidase activity (GO:0004252);;	K01358|4.1e-145|ghi:107945171|K01358 ATP-dependent Clp protease, protease subunit [EC:3.4.21.92] | (RefSeq) ATP-dependent Clp protease proteolytic subunit 6, chloroplastic-like isoform X1	--	Clp protease	ATP-dependent Clp protease proteolytic subunit 6, chloroplastic OS=Arabidopsis thaliana OX=3702 GN=CLPP6 PE=1 SV=1	PREDICTED: ATP-dependent Clp protease proteolytic subunit 6, chloroplastic-like isoform X3 [Gossypium hirsutum]	biological process: metabolic process (GO:0008152);; molecular function: catalytic activity (GO:0003824)
Gh_A04G143000	318	BXL5	--	--	--	0.006647	1.37846	up	0.124344	0.790631	normal	--	--	--	0.000183409	1.37157	up	0.616755	0.252794	normal	0.00453262	0.997548	normal	0.583144	-0.439873	normal		--	--	--	1.14043e-07	1.95019	up	0.950499	-0.0518269	normal	1.27854e-06	1.30977	up	--	--	--	Molecular Function: hydrolase activity, hydrolyzing O-glycosyl compounds (GO:0004553);; Molecular Function: xylan 1,4-beta-xylosidase activity (GO:0009044);; Cellular Component: plant-type cell wall (GO:0009505);; Biological Process: arabinan catabolic process (GO:0031222);; Biological Process: xylan catabolic process (GO:0045493);; Molecular Function: alpha-L-arabinofuranosidase activity (GO:004…	K15920|0.0e+00|ghi:107945153|K15920 xylan 1,4-beta-xylosidase [EC:3.2.1.37] | (RefSeq) probable beta-D-xylosidase 5	Amino sugar and nucleotide sugar metabolism (ko00520)	Glycosyl hydrolase family 3 C-terminal domain	Probable beta-D-xylosidase 5 OS=Arabidopsis thaliana OX=3702 GN=BXL5 PE=2 SV=2	PREDICTED: probable beta-D-xylosidase 5 [Gossypium hirsutum]	molecular function: catalytic activity (GO:0003824);; cellular component: cell (GO:0005623);; cellular component: cell part (GO:0044464);; biological process: metabolic process (GO:0008152);; biological process: single-organism process (GO:0044699);; biological process: cellular process (GO:0009987)
Gh_A04G143500	319	RPS29A	0.143334	-0.43895	normal	5.99062e-06	-1.22552	down	0.0871951	-0.622986	normal	0.177419	-0.445283	normal	1.05084e-05	-1.11694	down	1.9973e-07	-1.28364	down	0.000507294	-0.846385	normal	0.000747289	-0.787896	normal		0.235506	0.440346	normal	0.58221	-0.231913	normal	0.403217	0.364511	normal	0.547991	0.229663	normal	0.726014	0.127924	normal	Molecular Function: structural constituent of ribosome (GO:0003735);; Cellular Component: ribosome (GO:0005840);; Biological Process: translation (GO:0006412);; Molecular Function: zinc ion binding (GO:0008270);;	K02980|1.7e-29|dzi:111295804|K02980 small subunit ribosomal protein S29e | (RefSeq) 40S ribosomal protein S29	Ribosome (ko03010)	Ribosomal protein S14p/S29e	40S ribosomal protein S29 OS=Arabidopsis thaliana OX=3702 GN=RPS29A PE=3 SV=2	PREDICTED: 40S ribosomal protein S29 [Theobroma cacao]	molecular function: structural molecule activity (GO:0005198);; cellular component: cell (GO:0005623);; cellular component: macromolecular complex (GO:0032991);; cellular component: organelle (GO:0043226);; cellular component: cell part (GO:0044464);; biological process: metabolic process (GO:0008152);; biological process: cellular process (GO:0009987);; molecular function: binding (GO:0005488)
Gh_A04G144000	320	SN1	0.0841465	-1.03259	normal	4.4389e-10	-3.54357	down	0.134581	-0.529784	normal	4.3623e-15	-8.59243	down	0.00266792	-1.08175	down	5.83239e-05	-4.45433	down	0.817278	-0.0869728	normal	1.43565e-07	-2.71998	down		0.936374	0.101843	normal	0.96763	0.0606217	normal	--	--	--	0.0798951	0.554949	normal	1.06454e-05	5.99784	up	--	--	--	Gibberellin regulated protein	Snakin-1 OS=Solanum tuberosum OX=4113 GN=SN1 PE=1 SV=1	PREDICTED: snakin-1-like [Gossypium hirsutum]	--
Gh_A04G148600	321	Cyp1	--	--	--	--	--	--	0.342716	0.358321	normal	--	--	--	0.00356831	1.04219	up	0.903822	0.0581903	normal	0.392385	-0.371573	normal	0.345723	-0.450133	normal		--	--	--	0.00637561	1.11216	up	0.762414	0.218034	normal	0.33304	-0.379568	normal	0.220317	-0.65656	normal	Biological Process: protein peptidyl-prolyl isomerization (GO:0000413);; Molecular Function: peptidyl-prolyl cis-trans isomerase activity (GO:0003755);; Cellular Component: cytoplasm (GO:0005737);; Cellular Component: cytosol (GO:0005829);; Cellular Component: plasma membrane (GO:0005886);; Biological Process: protein folding (GO:0006457);; Molecular Function: cyclosporin A binding (GO:0016018);;	K01802|2.6e-97|ghi:107949078|K01802 peptidylprolyl isomerase [EC:5.2.1.8] | (RefSeq) peptidyl-prolyl cis-trans isomerase 1-like	--	Cyclophilin type peptidyl-prolyl cis-trans isomerase/CLD	Peptidyl-prolyl cis-trans isomerase 1 OS=Glycine max OX=3847 GN=Cyp1 PE=2 SV=1	PREDICTED: peptidyl-prolyl cis-trans isomerase 1-like [Gossypium hirsutum]	biological process: metabolic process (GO:0008152);; biological process: cellular process (GO:0009987);; molecular function: catalytic activity (GO:0003824);; cellular component: cell (GO:0005623);; cellular component: cell part (GO:0044464);; cellular component: membrane (GO:0016020);; molecular function: binding (GO:0005488)
Gh_A04G150400	322	BZIP11	0.479574	-0.282102	normal	0.625763	0.344585	normal	3.99943e-14	-3.24478	down	3.80873e-09	-9.21964	down	0.00206313	-1.02879	down	3.06204e-08	-1.64388	down	1.51009e-14	-2.32076	down	4.21058e-05	-1.14371	down		0.612854	0.333846	normal	0.403909	-0.405058	normal	0.00632251	-1.67194	down	--	--	--	9.1249e-08	8.43309	up	Molecular Function: transcription factor activity, sequence-specific DNA binding (GO:0003700);;	--	--	bZIP transcription factor	bZIP transcription factor 44 OS=Arabidopsis thaliana OX=3702 GN=BZIP44 PE=1 SV=1	PREDICTED: bZIP transcription factor 53-like [Gossypium hirsutum]	biological process: biological regulation (GO:0065007);; molecular function: nucleic acid binding transcription factor activity (GO:0001071)
Gh_A04G152700	323	4'OMT2	0.0599128	-0.7701	normal	0.000139015	1.3338	up	8.90846e-36	-3.77712	down	1.06789e-56	-6.23147	down	2.54941e-05	-1.01623	down	0.0119086	0.65897	normal	4.20535e-07	-1.23728	down	0.287302	-0.396211	normal		0.17557	-0.703896	normal	0.00283657	-0.939706	normal	2.74457e-07	-1.3958	down	4.87515e-18	1.84469	up	1.45731e-34	5.16194	up	Molecular Function: O-methyltransferase activity (GO:0008171);; Molecular Function: S-adenosylmethionine-dependent methyltransferase activity (GO:0008757);; Biological Process: aromatic compound biosynthetic process (GO:0019438);; Biological Process: methylation (GO:0032259);; Molecular Function: protein dimerization activity (GO:0046983);;	K22588|5.0e-98|boe:106329225|K22588 acetylserotonin O-methyltransferase, plant [EC:2.1.1.4] | (RefSeq) (R,S)-reticuline 7-O-methyltransferase-like isoform X1	Tryptophan metabolism (ko00380)	O-methyltransferase domain	Acetylserotonin O-methyltransferase OS=Arabidopsis thaliana OX=3702 GN=ASMT PE=1 SV=1	PREDICTED: 3'-hydroxy-N-methyl-(S)-coclaurine 4'-O-methyltransferase 2-like [Gossypium hirsutum]	biological process: metabolic process (GO:0008152);; molecular function: catalytic activity (GO:0003824);; biological process: cellular process (GO:0009987);; molecular function: binding (GO:0005488)
Gh_A04G156500	324	Gh_A04G156500	--	--	--	--	--	--	--	--	--	--	--	--	0.000130214	-5.92397	down	2.9083e-12	-9.25813	down	6.87215e-14	-9.70544	down	1.12126e-12	-9.33288	down		0.860526	1.01395	normal	--	--	--	--	--	--	--	--	--	--	--	--	Molecular Function: squalene monooxygenase activity (GO:0004506);; Cellular Component: endoplasmic reticulum (GO:0005783);; Cellular Component: integral component of membrane (GO:0016021);; Biological Process: sterol biosynthetic process (GO:0016126);; Molecular Function: flavin adenine dinucleotide binding (GO:0050660);;	K00511|4.2e-311|ghi:107934957|K00511 squalene monooxygenase [EC:1.14.14.17] | (RefSeq) squalene monooxygenase-like	Steroid biosynthesis (ko00100);; Sesquiterpenoid and triterpenoid biosynthesis (ko00909)	Squalene epoxidase	Squalene monooxygenase SE1 OS=Panax ginseng OX=4054 GN=SQE1 PE=2 SV=1	PREDICTED: squalene monooxygenase-like [Gossypium hirsutum]	biological process: metabolic process (GO:0008152);; biological process: single-organism process (GO:0044699);; molecular function: catalytic activity (GO:0003824);; cellular component: cell (GO:0005623);; cellular component: organelle (GO:0043226);; cellular component: cell part (GO:0044464);; cellular component: membrane (GO:0016020);; cellular component: membrane part (GO:0044425);; molecular …
Gh_A04G157200	325	At1g09660/At1g09670	0.00359167	0.906113	normal	4.232e-07	1.20634	up	0.22339	0.396531	normal	0.121675	0.521269	normal	1.76266e-07	1.15569	up	1.01626e-07	1.19534	up	6.01053e-05	0.852585	normal	8.34513e-06	0.948433	normal		0.818299	-0.16783	normal	0.831939	0.0884918	normal	0.528607	-0.199087	normal	0.248692	0.297709	normal	0.26697	0.286615	normal	Molecular Function: RNA binding (GO:0003723);;	K14945|1.3e-160|gab:108458375|K14945 protein quaking | (RefSeq) KH domain-containing protein At1g09660/At1g09670-like	--	Homodimerisation region of STAR domain protein	KH domain-containing protein At1g09660/At1g09670 OS=Arabidopsis thaliana OX=3702 GN=At1g09660/At1g09670 PE=2 SV=1	PREDICTED: KH domain-containing protein At1g09660/At1g09670-like isoform X2 [Gossypium hirsutum]	molecular function: binding (GO:0005488)
Gh_A04G159600	326	At1g48100	--	--	--	0.70173	-1.22216	normal	0.692875	-0.640219	normal	0.000727349	-9.73256	down	0.125881	0.744203	normal	0.000336177	-2.54876	down	0.0288355	1.74827	up	0.000802801	-3.00892	down		0.788276	-1.03248	normal	9.97738e-14	3.15675	up	--	--	--	0.0950431	1.39125	normal	--	--	--	Molecular Function: polygalacturonase activity (GO:0004650);; Cellular Component: extracellular region (GO:0005576);; Biological Process: carbohydrate metabolic process (GO:0005975);; Biological Process: cell wall organization (GO:0071555);;	K01184|9.9e-122|pper:18782466|K01184 polygalacturonase [EC:3.2.1.15] | (RefSeq) polygalacturonase At1g48100	Pentose and glucuronate interconversions (ko00040)	Glycosyl hydrolases family 28	Polygalacturonase At1g48100 OS=Arabidopsis thaliana OX=3702 GN=At1g48100 PE=2 SV=1	hypothetical protein B456_012G172100 [Gossypium raimondii]	molecular function: catalytic activity (GO:0003824);; cellular component: extracellular region (GO:0005576);; biological process: metabolic process (GO:0008152);; biological process: cellular process (GO:0009987);; biological process: cellular component organization or biogenesis (GO:0071840)
Gh_A04G163000	327	FAOMT	0.145034	0.772523	normal	0.102875	0.761101	normal	0.726233	0.213865	normal	0.304361	0.66828	normal	0.035016	0.732613	normal	0.00948174	-1.19605	down	0.036629	-0.836485	normal	0.00372874	-1.17404	down		0.110961	1.09947	normal	0.00152229	1.06529	up	0.0746368	-0.879453	normal	0.92761	0.0485327	normal	0.157667	-0.723817	normal	Molecular Function: O-methyltransferase activity (GO:0008171);;	K00588|2.5e-127|gab:108458342|K00588 caffeoyl-CoA O-methyltransferase [EC:2.1.1.104] | (RefSeq) flavonoid 3',5'-methyltransferase-like	Phenylpropanoid biosynthesis (ko00940);; Flavonoid biosynthesis (ko00941);; Stilbenoid, diarylheptanoid and gingerol biosynthesis (ko00945)	O-methyltransferase	Flavonoid 3',5'-methyltransferase OS=Vitis vinifera OX=29760 GN=FAOMT PE=1 SV=1	PREDICTED: flavonoid 3',5'-methyltransferase-like isoform X1 [Gossypium hirsutum]	biological process: metabolic process (GO:0008152);; molecular function: catalytic activity (GO:0003824)
Gh_A04G164000	328	ESP3	0.0858544	0.534216	normal	7.13465e-17	1.49281	up	1.03782e-11	1.36729	up	7.99298e-07	1.14401	up	1.43301e-06	1.05116	up	1.78311e-27	2.3871	up	0.000850767	0.769293	normal	1.50456e-13	1.54569	up		0.111542	-0.516027	normal	0.989928	0.00693204	normal	0.199334	0.356933	normal	3.17169e-09	-1.10614	down	0.717294	-0.0887158	normal	Molecular Function: nucleic acid binding (GO:0003676);; Molecular Function: helicase activity (GO:0004386);; Molecular Function: ATP binding (GO:0005524);;	K12813|0.0e+00|gra:105779426|K12813 pre-mRNA-splicing factor ATP-dependent RNA helicase DHX16 [EC:3.6.4.13] | (RefSeq) putative pre-mRNA-splicing factor ATP-dependent RNA helicase DHX16	Spliceosome (ko03040)	Oligonucleotide/oligosaccharide-binding (OB)-fold	Pre-mRNA-splicing factor ATP-dependent RNA helicase DEAH1 OS=Arabidopsis thaliana OX=3702 GN=ESP3 PE=1 SV=1	hypothetical protein GOBAR_AA10098 [Gossypium barbadense]	molecular function: binding (GO:0005488);; molecular function: catalytic activity (GO:0003824)
Gh_A04G164600	329	ITN1	0.1634	-1.71577	normal	0.899891	0.17641	normal	0.773714	-0.227853	normal	5.81971e-10	-11.1664	down	0.986461	0.012417	normal	8.08637e-05	-1.57737	down	0.57191	0.211591	normal	1.51794e-18	-3.28266	down		0.899298	0.409686	normal	2.66611e-08	2.13893	up	0.00553844	-1.36406	down	0.000153178	0.877972	normal	1.57551e-07	8.33527	up	Cellular Component: membrane (GO:0016020);; Cellular Component: integral component of membrane (GO:0016021);;	K15503|3.2e-136|gra:105779167|K15503 serine/threonine-protein phosphatase 6 regulatory ankyrin repeat subunit B | (RefSeq) uncharacterized LOC105779167	--	Ankyrin repeats (3 copies)	--	PREDICTED: ankyrin-3-like [Gossypium hirsutum]	cellular component: membrane (GO:0016020);; cellular component: membrane part (GO:0044425)
Gh_A04G166400	330	SCPL50	--	--	--	--	--	--	--	--	--	--	--	--	0.00798891	-1.11932	down	3.29221e-08	-3.94463	down	1.49698e-07	-1.7965	down	2.70062e-06	-3.91915	down		0.553178	0.616449	normal	--	--	--	--	--	--	--	--	--	--	--	--	Molecular Function: serine-type carboxypeptidase activity (GO:0004185);;	K09645|2.9e-257|gab:108483147|K09645 vitellogenic carboxypeptidase-like protein [EC:3.4.16.-] | (RefSeq) serine carboxypeptidase-like 50	--	Serine carboxypeptidase	Serine carboxypeptidase-like 50 OS=Arabidopsis thaliana OX=3702 GN=SCPL50 PE=2 SV=1	hypothetical protein ES288_A04G189600v1 [Gossypium darwinii]	biological process: metabolic process (GO:0008152);; molecular function: catalytic activity (GO:0003824)
Gh_A04G168600	331	RDR1	--	--	--	0.0335046	1.2151	up	0.175314	0.854216	normal	--	--	--	0.00647674	1.12943	up	0.29333	0.725064	normal	0.0803519	0.765777	normal	--	--	--		--	--	--	0.37825	0.606436	normal	0.732557	0.377295	normal	0.0677442	0.790536	normal	--	--	--	Molecular Function: RNA binding (GO:0003723);; Molecular Function: RNA-directed 5'-3' RNA polymerase activity (GO:0003968);; Biological Process: gene silencing by RNA (GO:0031047);;	K11699|0.0e+00|gab:108481748|K11699 RNA-dependent RNA polymerase [EC:2.7.7.48] | (RefSeq) probable RNA-dependent RNA polymerase 1	--	RNA dependent RNA polymerase	RNA-dependent RNA polymerase 1 OS=Arabidopsis thaliana OX=3702 GN=RDR1 PE=2 SV=1	hypothetical protein ES332_A04G188100v1 [Gossypium tomentosum]	molecular function: binding (GO:0005488);; molecular function: catalytic activity (GO:0003824);; biological process: cellular process (GO:0009987);; biological process: single-organism process (GO:0044699);; biological process: biological regulation (GO:0065007)
Gh_A04G171500	332	CML45	--	--	--	--	--	--	--	--	--	--	--	--	0.0120049	1.72162	up	--	--	--	--	--	--	0.0019757	2.0431	up		--	--	--	1.02115e-07	5.61952	up	--	--	--	--	--	--	3.59796e-06	2.64738	up	Molecular Function: calcium ion binding (GO:0005509);;	K02183|1.8e-84|ghi:107934864|K02183 calmodulin | (RefSeq) probable calcium-binding protein CML45	MAPK signaling pathway - plant (ko04016);; Phosphatidylinositol signaling system (ko04070);; Plant-pathogen interaction (ko04626)	EF hand	Probable calcium-binding protein CML46 OS=Arabidopsis thaliana OX=3702 GN=CML46 PE=1 SV=1	PREDICTED: probable calcium-binding protein CML45 [Gossypium hirsutum]	molecular function: binding (GO:0005488)
Gh_A04G172100	333	CALS7	0.133107	-0.454663	normal	0.00581873	-0.917642	normal	0.00788158	-0.853026	normal	7.97905e-12	-2.55329	down	5.70877e-06	0.946914	normal	0.320762	-0.336996	normal	0.000981432	-0.701054	normal	1.23713e-06	-1.67835	down		0.616315	-0.296711	normal	1.06018e-07	1.10778	up	0.657946	0.26525	normal	0.669522	-0.129634	normal	0.270494	0.606917	normal	Cellular Component: 1,3-beta-D-glucan synthase complex (GO:0000148);; Molecular Function: 1,3-beta-D-glucan synthase activity (GO:0003843);; Biological Process: (1->3)-beta-D-glucan biosynthetic process (GO:0006075);; Cellular Component: integral component of membrane (GO:0016021);;	K11000|0.0e+00|gab:108482780|K11000 callose synthase [EC:2.4.1.-] | (RefSeq) callose synthase 7-like isoform X1	--	1,3-beta-glucan synthase component	Callose synthase 7 OS=Arabidopsis thaliana OX=3702 GN=CALS7 PE=3 SV=3	hypothetical protein ES332_A04G191700v1 [Gossypium tomentosum]	cellular component: cell (GO:0005623);; cellular component: membrane (GO:0016020);; cellular component: macromolecular complex (GO:0032991);; cellular component: membrane part (GO:0044425);; cellular component: cell part (GO:0044464);; molecular function: catalytic activity (GO:0003824);; biological process: metabolic process (GO:0008152);; biological process: cellular process (GO:0009987);; biol…
Gh_A05G003000	334	RPP3A	0.000798467	-0.900442	normal	1.39835e-07	-1.27186	down	0.149905	-0.360939	normal	0.707231	0.11588	normal	4.66951e-10	-1.13297	down	3.63375e-09	-1.34847	down	0.00737622	-0.490651	normal	0.0033881	-0.579664	normal		0.832339	0.168268	normal	0.807358	-0.0596849	normal	0.842245	0.0714936	normal	0.768578	0.0522548	normal	6.19033e-05	-0.497514	normal	Molecular Function: structural constituent of ribosome (GO:0003735);; Cellular Component: ribosome (GO:0005840);; Biological Process: translational elongation (GO:0006414);;	K02942|2.5e-30|gab:108465308|K02942 large subunit ribosomal protein LP1 | (RefSeq) 60S acidic ribosomal protein P3-like	Ribosome (ko03010)	60s Acidic ribosomal protein	60S acidic ribosomal protein P3-1 OS=Arabidopsis thaliana OX=3702 GN=RPP3A PE=3 SV=1	hypothetical protein ES319_A05G003500v1 [Gossypium barbadense]	molecular function: structural molecule activity (GO:0005198);; cellular component: cell (GO:0005623);; cellular component: macromolecular complex (GO:0032991);; cellular component: organelle (GO:0043226);; cellular component: cell part (GO:0044464);; biological process: metabolic process (GO:0008152);; biological process: cellular process (GO:0009987)
Gh_A05G003300	335	Gh_A05G003300	0.208913	0.704656	normal	0.0325094	0.911569	normal	0.831163	-0.101615	normal	0.323665	0.669044	normal	4.86918e-05	1.15298	up	0.865017	0.0952003	normal	0.269214	-0.495343	normal	0.464095	0.315663	normal		0.163748	0.792561	normal	0.00141786	1.24392	up	0.967843	-0.0419013	normal	0.393683	0.413514	normal	0.470721	0.463052	normal	--	--	--	--	--	PREDICTED: uncharacterized protein LOC107907356 isoform X1 [Gossypium hirsutum]	--
Gh_A05G004100	336	At5g57480	0.124709	-0.930296	normal	0.00118955	-0.911924	normal	0.856221	-0.0622071	normal	0.841364	-0.068569	normal	7.40523e-05	-1.08498	down	5.16599e-20	-3.75661	down	3.09945e-05	-1.19894	down	0.000136574	-1.09733	down		0.597272	0.297198	normal	0.867569	0.148794	normal	1.07418e-07	-2.56473	down	0.00512744	-0.832825	normal	0.0417617	-0.705023	normal	Molecular Function: ATP binding (GO:0005524);;	K08900|1.6e-105|hbr:110669304|K08900 mitochondrial chaperone BCS1 | (RefSeq) AAA-ATPase At4g25835-like	--	Domain associated at C-terminal with AAA	AAA-ATPase At5g57480 OS=Arabidopsis thaliana OX=3702 GN=At5g57480 PE=3 SV=1	PREDICTED: AAA-ATPase At5g57480-like [Gossypium hirsutum]	molecular function: binding (GO:0005488)
Gh_A05G004900	337	XTH22	0.736837	-0.391297	normal	0.629929	0.402625	normal	2.67696e-11	3.53758	up	0.0108374	-2.0952	down	2.77511e-23	-3.74503	down	0.0389272	-3.45112	down	4.30906e-05	1.03977	up	1.01239e-06	-1.59216	down		6.75698e-05	2.34076	up	--	--	--	0.587114	-1.52056	normal	0.688188	-0.147738	normal	2.73961e-09	2.87342	up	Molecular Function: hydrolase activity, hydrolyzing O-glycosyl compounds (GO:0004553);; Cellular Component: cell wall (GO:0005618);; Biological Process: xyloglucan metabolic process (GO:0010411);; Molecular Function: xyloglucan:xyloglucosyl transferase activity (GO:0016762);; Biological Process: cell wall biogenesis (GO:0042546);; Cellular Component: apoplast (GO:0048046);; Biological Process: ce…	K14504|1.1e-172|ghi:107941404|K14504 xyloglucan:xyloglucosyl transferase TCH4 [EC:2.4.1.207] | (RefSeq) xyloglucan endotransglucosylase/hydrolase protein 22-like	Plant hormone signal transduction (ko04075)	Glycosyl hydrolases family 16	Probable xyloglucan endotransglucosylase/hydrolase protein 23 OS=Arabidopsis thaliana OX=3702 GN=XTH23 PE=2 SV=1	PREDICTED: xyloglucan endotransglucosylase/hydrolase protein 22-like [Gossypium hirsutum]	molecular function: catalytic activity (GO:0003824);; cellular component: cell (GO:0005623);; cellular component: cell part (GO:0044464);; biological process: metabolic process (GO:0008152);; biological process: cellular process (GO:0009987);; biological process: cellular component organization or biogenesis (GO:0071840);; cellular component: extracellular region (GO:0005576)
Gh_A05G006700	338	SAMDC	--	--	--	--	--	--	--	--	--	--	--	--	0.00169342	1.52014	up	--	--	--	--	--	--	--	--	--		--	--	--	0.0056862	2.38857	up	--	--	--	--	--	--	--	--	--	Molecular Function: adenosylmethionine decarboxylase activity (GO:0004014);; Biological Process: spermine biosynthetic process (GO:0006597);; Biological Process: spermidine biosynthetic process (GO:0008295);;	K01611|2.0e-217|gab:108458373|K01611 S-adenosylmethionine decarboxylase [EC:4.1.1.50] | (RefSeq) S-adenosylmethionine decarboxylase proenzyme-like	Cysteine and methionine metabolism (ko00270);; Arginine and proline metabolism (ko00330)	Adenosylmethionine decarboxylase	S-adenosylmethionine decarboxylase proenzyme OS=Oryza sativa subsp. indica OX=39946 GN=SAMDC PE=2 SV=2	hypothetical protein E1A91_A05G009100v1 [Gossypium mustelinum]	molecular function: catalytic activity (GO:0003824);; biological process: metabolic process (GO:0008152);; biological process: cellular process (GO:0009987)
Gh_A05G008500	339	CYCA2-2	--	--	--	--	--	--	--	--	--	0.000522655	-4.77098	down	1.47612e-06	-2.59164	down	5.26406e-09	-3.421	down	3.19488e-06	-3.29921	down	5.22621e-12	-4.74499	down		0.979399	-0.0822803	normal	--	--	--	--	--	--	--	--	--	--	--	--	Biological Process: regulation of cyclin-dependent protein serine/threonine kinase activity (GO:0000079);; Cellular Component: cyclin-dependent protein kinase holoenzyme complex (GO:0000307);; Cellular Component: nucleus (GO:0005634);; Cellular Component: cytoplasm (GO:0005737);; Molecular Function: cyclin-dependent protein serine/threonine kinase regulator activity (GO:0016538);; Cellular Compon…	K06627|2.4e-273|ghi:107907279|K06627 cyclin-A | (RefSeq) cyclin-A2-2-like	--	Cyclin, N-terminal domain	Cyclin-A2-2 OS=Arabidopsis thaliana OX=3702 GN=CYCA2-2 PE=2 SV=1	PREDICTED: cyclin-A2-2-like [Gossypium hirsutum]	biological process: biological regulation (GO:0065007);; cellular component: cell (GO:0005623);; cellular component: macromolecular complex (GO:0032991);; cellular component: cell part (GO:0044464);; cellular component: organelle (GO:0043226);; molecular function: molecular function regulator (GO:0098772);; cellular component: other organism (GO:0044215);; cellular component: other organism part …
Gh_A05G010900	340	CRCK3	0.0209049	0.68889	normal	5.51071e-08	1.22466	up	3.6406e-07	1.22416	up	0.00114589	-1.03262	down	1.0099e-05	1.04674	up	5.01919e-12	1.74265	up	1.8561e-07	1.46668	up	0.00934737	0.807499	normal		0.337655	0.562771	normal	8.29502e-06	0.926948	normal	4.14732e-15	1.06134	up	6.36684e-05	0.811803	normal	5.32111e-19	2.42675	up	Molecular Function: protein serine/threonine kinase activity (GO:0004674);; Molecular Function: ATP binding (GO:0005524);;	K13430|4.6e-54|gab:108472558|K13430 serine/threonine-protein kinase PBS1 [EC:2.7.11.1] | (RefSeq) serine/threonine-protein kinase CDL1-like	Plant-pathogen interaction (ko04626)	Protein tyrosine and serine/threonine kinase	Calmodulin-binding receptor-like cytoplasmic kinase 3 OS=Arabidopsis thaliana OX=3702 GN=CRCK3 PE=2 SV=1	hypothetical protein ES319_A05G015400v1 [Gossypium barbadense]	biological process: metabolic process (GO:0008152);; biological process: cellular process (GO:0009987);; molecular function: catalytic activity (GO:0003824);; molecular function: binding (GO:0005488)
Gh_A05G011700	341	Ifit2	--	--	--	--	--	--	8.35339e-06	1.75074	up	3.96098e-06	2.33794	up	0.0173105	1.00103	up	0.0214508	1.00842	up	5.77574e-14	2.13994	up	0.00230368	1.21406	up		--	--	--	0.0354697	0.945464	normal	0.24878	0.615994	normal	0.372199	-0.206982	normal	2.12955e-07	-1.70633	down	--	--	--	Tetratricopeptide repeat	--	hypothetical protein ES332_A05G017700v1 [Gossypium tomentosum]	--
Gh_A05G015100	342	CjBAp12	--	--	--	--	--	--	7.48186e-09	1.92039	up	0.0433794	0.964074	normal	0.124522	0.779788	normal	0.0134241	1.15325	up	3.89075e-15	2.7737	up	--	--	--		--	--	--	0.0242134	1.07331	up	0.125771	0.699657	normal	0.0022314	0.795368	normal	0.212133	-0.56986	normal	--	K14771|9.3e-24|egr:104428623|K14771 U3 small nucleolar RNA-associated protein 19 | (RefSeq) uncharacterized protein LOC104428623	--	Lytic transglycolase	--	PREDICTED: EG45-like domain containing protein [Gossypium hirsutum]	--
Gh_A05G016200	343	EFM	0.112706	-0.677591	normal	0.774679	0.113445	normal	0.0260818	-0.696509	normal	0.0318078	-1.56629	down	0.622193	0.158906	normal	0.831827	-0.0695832	normal	0.0496854	-0.619736	normal	0.0338307	-0.667979	normal		0.65069	0.303639	normal	0.000590506	1.14411	up	0.847914	0.100532	normal	0.244606	0.394037	normal	0.0671062	1.23345	normal	Molecular Function: DNA binding (GO:0003677);; Cellular Component: nucleus (GO:0005634);;	K14491|3.9e-10|egr:104436113|K14491 two-component response regulator ARR-B family | (RefSeq) two-component response regulator ORR24	Plant hormone signal transduction (ko04075)	Myb-like DNA-binding domain	Myb family transcription factor EFM OS=Arabidopsis thaliana OX=3702 GN=EFM PE=1 SV=2	PREDICTED: uncharacterized protein LOC107907243 [Gossypium hirsutum]	molecular function: binding (GO:0005488);; cellular component: cell (GO:0005623);; cellular component: organelle (GO:0043226);; cellular component: cell part (GO:0044464)
Gh_A05G020800	344	Gh_A05G020800	0.0027442	-0.959064	normal	0.306179	0.307671	normal	0.00023014	-0.89398	normal	5.52646e-40	-3.05033	down	1.54067e-38	-2.16959	down	4.55168e-07	-1.6778	down	6.83769e-32	-1.69949	down	3.71256e-17	-1.47971	down		3.49915e-06	0.588379	normal	0.105467	-0.620542	normal	0.0011368	-1.4134	down	0.43056	-0.210034	normal	1.01669e-12	2.18312	up	--	--	--	Protein of unknown function (DUF1005)	--	PREDICTED: uncharacterized protein LOC107958723 [Gossypium hirsutum]	--
Gh_A05G020900	345	LRX4	0.0923186	-0.894947	normal	0.585627	-0.295131	normal	0.722898	-0.165277	normal	4.4705e-05	-2.66579	down	0.643142	-0.119462	normal	0.0198274	-0.819351	normal	0.33361	-0.206146	normal	6.90671e-14	-1.76371	down		0.834631	0.233732	normal	0.00188395	1.00737	up	0.64121	-0.307998	normal	0.420509	0.211572	normal	0.0360206	1.16825	up	Molecular Function: protein binding (GO:0005515);;	--	--	Leucine rich repeat	Pollen-specific leucine-rich repeat extensin-like protein 2 OS=Arabidopsis thaliana OX=3702 GN=PEX2 PE=1 SV=1	hypothetical protein B456_009G028700 [Gossypium raimondii]	molecular function: binding (GO:0005488)
Gh_A05G021800	346	RPL31	0.00699613	-0.980636	normal	7.08238e-06	-1.47818	down	6.23539e-05	-1.26221	down	3.2808e-10	-3.31731	down	1.47622e-06	-1.11009	down	3.7929e-09	-1.55022	down	0.00325154	-0.650997	normal	4.82722e-19	-2.32816	down		0.736675	0.286474	normal	0.623504	0.160054	normal	0.619694	0.194325	normal	7.59362e-07	0.914484	normal	0.00884353	1.30667	up	Biological Process: cytoplasmic translation (GO:0002181);; Molecular Function: structural constituent of ribosome (GO:0003735);; Cellular Component: cytosolic large ribosomal subunit (GO:0022625);;	K02910|1.5e-59|ghi:107907160|K02910 large subunit ribosomal protein L31e | (RefSeq) 60S ribosomal protein L31-like	Ribosome (ko03010)	Ribosomal protein L31e	60S ribosomal protein L31 OS=Nicotiana glutinosa OX=35889 GN=RPL31 PE=2 SV=1	PREDICTED: 60S ribosomal protein L31 [Gossypium raimondii]	biological process: metabolic process (GO:0008152);; biological process: cellular process (GO:0009987);; molecular function: structural molecule activity (GO:0005198);; cellular component: cell (GO:0005623);; cellular component: macromolecular complex (GO:0032991);; cellular component: organelle (GO:0043226);; cellular component: organelle part (GO:0044422);; cellular component: cell part (GO:004…
Gh_A05G024100	347	IQM1	0.012473	-0.816744	normal	0.0183844	-0.70038	normal	3.68439e-08	1.3176	up	0.831109	0.0803758	normal	0.897725	0.048963	normal	0.603664	0.212067	normal	0.182216	-0.383872	normal	0.140869	0.489989	normal		0.474808	0.387453	normal	2.53626e-05	1.25965	up	0.00164869	1.27986	up	1.19451e-09	-1.30439	down	0.0361011	0.822036	normal	--	K15015|6.4e-14|aip:107609646|K15015 solute carrier family 32 (vesicular inhibitory amino acid transporter) | (RefSeq) uncharacterized protein LOC107609646 isoform X1	--	--	IQ domain-containing protein IQM4 OS=Arabidopsis thaliana OX=3702 GN=IQM4 PE=2 SV=1	PREDICTED: IQ domain-containing protein IQM1-like [Gossypium hirsutum]	--
Gh_A05G026200	348	ABP20	--	--	--	0.568887	1.2875	normal	0.264341	1.54144	normal	0.00200824	-5.68266	down	0.000103487	-3.06014	down	0.000357258	-2.48415	down	0.00328999	2.38056	up	3.96914e-09	-7.34876	down		0.947704	0.331878	normal	0.102668	4.24522	normal	0.0653224	-3.46237	normal	0.102055	1.20941	normal	--	--	--	Cellular Component: cell wall (GO:0005618);; Molecular Function: manganese ion binding (GO:0030145);; Molecular Function: nutrient reservoir activity (GO:0045735);; Cellular Component: apoplast (GO:0048046);;	--	--	Cupin	Auxin-binding protein ABP19a OS=Prunus persica OX=3760 GN=ABP19A PE=3 SV=1	PREDICTED: auxin-binding protein ABP19a-like [Gossypium hirsutum]	cellular component: cell (GO:0005623);; cellular component: cell part (GO:0044464);; molecular function: binding (GO:0005488);; molecular function: nutrient reservoir activity (GO:0045735);; cellular component: extracellular region (GO:0005576)
Gh_A05G029500	349	ATL4	0.208119	0.595822	normal	0.0214649	-0.923237	normal	0.14532	-0.430512	normal	0.00110806	0.932593	normal	0.150586	-0.548054	normal	0.677483	-0.157994	normal	0.0100356	-0.965087	normal	0.559812	-0.214267	normal		0.999863	-0.000521235	normal	0.00718282	-1.13762	down	0.0781648	0.744557	normal	0.0959822	-0.524693	normal	2.4626e-06	-1.11779	down	Cellular Component: integral component of membrane (GO:0016021);; Biological Process: protein ubiquitination (GO:0016567);; Molecular Function: ubiquitin protein ligase activity (GO:0061630);;	K16281|3.0e-67|dzi:111299223|K16281 RING-H2 zinc finger protein RHA1 | (RefSeq) E3 ubiquitin-protein ligase ATL4-like	--	Ring finger domain	Brassinosteroid-responsive RING protein 1 OS=Arabidopsis thaliana OX=3702 GN=BRH1 PE=2 SV=1	PREDICTED: E3 ubiquitin-protein ligase ATL4-like [Gossypium hirsutum]	cellular component: membrane (GO:0016020);; cellular component: membrane part (GO:0044425);; biological process: metabolic process (GO:0008152);; biological process: cellular process (GO:0009987);; molecular function: catalytic activity (GO:0003824)
Gh_A05G030800	350	MSL10	0.253436	-0.819468	normal	0.521454	-0.465007	normal	0.317585	0.587741	normal	0.0885546	-1.21614	normal	0.0221767	0.73497	normal	0.66644	-0.209472	normal	0.00311522	0.873033	normal	0.835249	-0.0799134	normal		0.99295	0.0193198	normal	1.57763e-05	1.5739	up	0.759457	0.255437	normal	0.325354	0.324581	normal	0.000434667	1.19211	up	Cellular Component: plasma membrane (GO:0005886);; Cellular Component: integral component of membrane (GO:0016021);; Biological Process: transmembrane transport (GO:0055085);;	K22048|0.0e+00|gab:108452496|K22048 mechanosensitive ion channel protein 4/5/6/7/8/9/10 | (RefSeq) mechanosensitive ion channel protein 10-like	--	Mechanosensitive ion channel	Mechanosensitive ion channel protein 10 OS=Arabidopsis thaliana OX=3702 GN=MSL10 PE=1 SV=1	hypothetical protein ES288_A05G041400v1 [Gossypium darwinii]	cellular component: cell (GO:0005623);; cellular component: membrane (GO:0016020);; cellular component: cell part (GO:0044464);; cellular component: membrane part (GO:0044425);; biological process: localization (GO:0051179)
Gh_A05G032400	351	GRXC6	--	--	--	--	--	--	1.05842e-06	2.3493	up	--	--	--	0.000834378	1.72992	up	--	--	--	5.13284e-24	3.32435	up	--	--	--		--	--	--	0.258153	0.826877	normal	0.238495	-0.687284	normal	3.12565e-10	1.28126	up	0.230027	-0.696801	normal	Molecular Function: electron carrier activity (GO:0009055);; Molecular Function: protein disulfide oxidoreductase activity (GO:0015035);;	K03676|2.2e-50|gra:105772269|K03676 glutaredoxin 3 | (RefSeq) glutaredoxin-C6-like	--	Glutaredoxin	Glutaredoxin-C6 OS=Arabidopsis thaliana OX=3702 GN=GRXC6 PE=2 SV=2	PREDICTED: glutaredoxin-C6-like [Gossypium hirsutum]	molecular function: electron carrier activity (GO:0009055);; biological process: metabolic process (GO:0008152);; biological process: single-organism process (GO:0044699);; molecular function: catalytic activity (GO:0003824)
Gh_A05G048100	352	At5g10820	--	--	--	--	--	--	1.16059e-08	5.18407	up	6.67564e-10	6.33094	up	6.77544e-05	2.48435	up	0.00410994	2.04783	up	2.44488e-09	3.40889	up	--	--	--		--	--	--	0.000654431	2.29494	up	0.016171	1.62592	up	1.32337e-05	1.39465	up	0.018924	-1.17379	down	Cellular Component: integral component of membrane (GO:0016021);;	--	--	BT1 family	Probable folate-biopterin transporter 6 OS=Arabidopsis thaliana OX=3702 GN=At5g10820 PE=2 SV=1	PREDICTED: probable folate-biopterin transporter 6 [Gossypium hirsutum]	cellular component: membrane (GO:0016020);; cellular component: membrane part (GO:0044425)
Gh_A05G049000	353	PER18	--	--	--	0.714181	-1.84477	normal	0.612674	-1.11618	normal	0.250465	-2.2666	normal	0.734072	0.261567	normal	--	--	--	--	--	--	--	--	--		0.884704	-0.932485	normal	0.000157479	3.22149	up	--	--	--	0.242157	-1.04893	normal	--	--	--	Molecular Function: peroxidase activity (GO:0004601);; Cellular Component: extracellular region (GO:0005576);; Biological Process: response to oxidative stress (GO:0006979);; Cellular Component: plant-type cell wall (GO:0009505);; Cellular Component: plasmodesma (GO:0009506);; Molecular Function: heme binding (GO:0020037);; Biological Process: hydrogen peroxide catabolic process (GO:0042744);; Mo…	K00430|1.4e-187|gab:108470782|K00430 peroxidase [EC:1.11.1.7] | (RefSeq) peroxidase 46	Phenylpropanoid biosynthesis (ko00940)	Peroxidase	Peroxidase 18 OS=Arabidopsis thaliana OX=3702 GN=PER18 PE=3 SV=1	peroxidase 46-like [Gossypium hirsutum]	biological process: metabolic process (GO:0008152);; biological process: cellular process (GO:0009987);; biological process: single-organism process (GO:0044699);; biological process: response to stimulus (GO:0050896);; biological process: detoxification (GO:0098754);; molecular function: catalytic activity (GO:0003824);; molecular function: antioxidant activity (GO:0016209);; cellular component:…
Gh_A05G051800	354	SELENOH	0.123887	-1.15632	normal	0.00346542	-2.03697	down	0.000191848	-2.43604	down	0.0155168	-2.08488	down	0.000317923	-1.33504	down	1.26383e-07	-2.08761	down	3.56076e-10	-2.81398	down	1.18023e-05	-1.66573	down		0.825157	0.420092	normal	0.624962	0.24301	normal	0.476741	0.349711	normal	0.905617	0.0714801	normal	0.0219727	0.87809	normal	--	--	--	--	--	hypothetical protein ES319_A05G067500v1 [Gossypium barbadense]	--
Gh_A05G054300	355	BHLH122	1.5775e-05	0.844258	normal	1.34913e-07	0.63697	normal	2.41389e-05	-0.591023	normal	0.0132603	-0.404352	normal	2.99622e-26	1.07549	up	7.44504e-18	1.22175	up	0.251897	0.152477	normal	1.40462e-06	0.617793	normal		0.312698	-0.251292	normal	0.962121	-0.0147472	normal	0.0500854	0.312153	normal	1.25676e-06	0.500037	normal	7.08335e-11	0.796353	normal	Molecular Function: protein dimerization activity (GO:0046983);;	K18878|7.8e-10|cann:107866053|K18878 BHLH transcription factor Upa20 | (RefSeq) Upa20; transcription factor bHLH137-like	Plant-pathogen interaction (ko04626)	Helix-loop-helix DNA-binding domain	Transcription factor bHLH122 OS=Arabidopsis thaliana OX=3702 GN=BHLH122 PE=1 SV=1	PREDICTED: transcription factor bHLH122 isoform X1 [Gossypium arboreum]	molecular function: binding (GO:0005488)
Gh_A05G055100	356	BB	0.105786	-1.24684	normal	0.123013	-1.22592	normal	0.430236	-0.578291	normal	0.12076	-1.4688	normal	0.869347	-0.0868658	normal	0.0620217	-0.879786	normal	0.434827	-0.331296	normal	0.0026334	-1.34959	down		0.981418	0.0711218	normal	3.12205e-06	1.22842	up	0.530395	0.396073	normal	0.248066	0.341915	normal	0.686363	0.228208	normal	Molecular Function: ubiquitin-protein transferase activity (GO:0004842);; Molecular Function: ligase activity (GO:0016874);; Molecular Function: ubiquitin conjugating enzyme binding (GO:0031624);; Biological Process: negative regulation of organ growth (GO:0046621);;	K19045|2.0e-146|ghi:107959309|K19045 E3 ubiquitin-protein ligase BIG BROTHER and related proteins [EC:2.3.2.27] | (RefSeq) E3 ubiquitin ligase BIG BROTHER-like	--	Ring finger domain	E3 ubiquitin-protein ligase BIG BROTHER OS=Arabidopsis thaliana OX=3702 GN=BB PE=1 SV=1	PREDICTED: E3 ubiquitin ligase BIG BROTHER-like [Gossypium hirsutum]	molecular function: catalytic activity (GO:0003824);; molecular function: binding (GO:0005488);; biological process: biological regulation (GO:0065007)
Gh_A05G064000	357	KIN12E	--	--	--	--	--	--	0.201578	-1.21472	normal	0.0403945	-2.53582	down	1.4833e-05	-2.76961	down	2.85595e-11	-5.14585	down	4.55333e-05	-2.30607	down	1.63501e-06	-2.51335	down		0.954214	0.194635	normal	--	--	--	--	--	--	0.146166	-0.862339	normal	--	--	--	Molecular Function: microtubule motor activity (GO:0003777);; Molecular Function: ATP binding (GO:0005524);; Biological Process: microtubule-based movement (GO:0007018);; Molecular Function: microtubule binding (GO:0008017);;	K10400|4.6e-130|ghi:107959232|K10400 kinesin family member 15 | (RefSeq) phragmoplast orienting kinesin 2-like	--	--	Kinesin-like protein KIN-12G OS=Oryza sativa subsp. japonica OX=39947 GN=KIN12G PE=3 SV=1	hypothetical protein ES319_A05G080500v1 [Gossypium barbadense]	molecular function: catalytic activity (GO:0003824);; molecular function: binding (GO:0005488);; biological process: cellular process (GO:0009987);; biological process: single-organism process (GO:0044699)
Gh_A05G066800	358	RIN1	0.369105	-0.495826	normal	0.456369	0.36776	normal	1.86515e-08	1.90984	up	0.0117398	1.22688	up	1.22304e-05	-1.05814	down	0.996807	-0.00107223	normal	6.7698e-09	0.947133	normal	0.758543	-0.0772115	normal		0.421218	0.57196	normal	0.982589	0.0142581	normal	0.684717	0.18138	normal	0.0133834	-0.371922	normal	0.00549864	-0.697747	normal	Biological Process: box C/D snoRNP assembly (GO:0000492);; Cellular Component: Swr1 complex (GO:0000812);; Molecular Function: DNA helicase activity (GO:0003678);; Molecular Function: ATP binding (GO:0005524);; Biological Process: chromatin remodeling (GO:0006338);; Biological Process: regulation of transcription from RNA polymerase II promoter (GO:0006357);; Biological Process: histone acetylati…	K04499|2.9e-252|ghi:107959211|K04499 RuvB-like protein 1 (pontin 52) | (RefSeq) ruvB-like protein 1	--	TIP49 P-loop domain	RuvB-like protein 1 OS=Arabidopsis thaliana OX=3702 GN=RIN1 PE=1 SV=1	PREDICTED: ruvB-like protein 1 [Gossypium hirsutum]	biological process: cellular process (GO:0009987);; biological process: cellular component organization or biogenesis (GO:0071840);; cellular component: cell (GO:0005623);; cellular component: membrane-enclosed lumen (GO:0031974);; cellular component: macromolecular complex (GO:0032991);; cellular component: organelle (GO:0043226);; cellular component: organelle part (GO:0044422);; cellular compo…
Gh_A05G068100	359	POLE3	0.848378	-0.111708	normal	0.172184	-0.617244	normal	0.718279	-0.145761	normal	0.43768	-0.410538	normal	0.011475	-1.08303	down	0.00685403	-1.15233	down	0.0752559	-0.672174	normal	0.0231387	-0.866477	normal		0.552159	0.485092	normal	0.415402	-0.480299	normal	--	--	--	0.949494	-0.0270471	normal	0.908623	0.0618856	normal	Cellular Component: nucleus (GO:0005634);; Molecular Function: protein heterodimerization activity (GO:0046982);;	K02326|3.9e-79|gab:108453356|K02326 DNA polymerase epsilon subunit 3 [EC:2.7.7.7] | (RefSeq) DNA polymerase epsilon subunit 3-like	DNA replication (ko03030);; Base excision repair (ko03410);; Nucleotide excision repair (ko03420)	Histone-like transcription factor (CBF/NF-Y) and archaeal histone	--	PREDICTED: DNA polymerase epsilon subunit 3-like [Gossypium arboreum]	cellular component: cell (GO:0005623);; cellular component: organelle (GO:0043226);; cellular component: cell part (GO:0044464);; molecular function: binding (GO:0005488)
Gh_A05G070200	360	POL2A	--	--	--	--	--	--	--	--	--	--	--	--	0.000101578	-3.93685	down	0.00016194	-5.19064	down	0.00115516	-4.82234	down	3.05566e-14	-6.41372	down		0.87297	0.773504	normal	--	--	--	--	--	--	--	--	--	--	--	--	Molecular Function: nucleotide binding (GO:0000166);; Molecular Function: DNA binding (GO:0003677);; Molecular Function: DNA-directed DNA polymerase activity (GO:0003887);; Biological Process: DNA replication (GO:0006260);; Biological Process: DNA repair (GO:0006281);; Molecular Function: zinc ion binding (GO:0008270);; Cellular Component: epsilon DNA polymerase complex (GO:0008622);; Molecular F…	K02324|0.0e+00|ghi:107959376|K02324 DNA polymerase epsilon subunit 1 [EC:2.7.7.7] | (RefSeq) DNA polymerase epsilon catalytic subunit A-like	DNA replication (ko03030);; Base excision repair (ko03410);; Nucleotide excision repair (ko03420)	Domain of unknown function (DUF1744)	DNA polymerase epsilon catalytic subunit A OS=Arabidopsis thaliana OX=3702 GN=POL2A PE=1 SV=1	hypothetical protein ES332_A05G089500v1 [Gossypium tomentosum]	molecular function: binding (GO:0005488);; biological process: metabolic process (GO:0008152);; biological process: cellular process (GO:0009987);; molecular function: catalytic activity (GO:0003824);; biological process: response to stimulus (GO:0050896);; cellular component: cell (GO:0005623);; cellular component: membrane-enclosed lumen (GO:0031974);; cellular component: macromolecular complex…
Gh_A05G073900	361	CAB6A	6.33009e-10	-0.886389	normal	0.878249	0.0419932	normal	4.59482e-105	-4.25601	down	5.48502e-54	-7.71404	down	6.08366e-32	-1.11447	down	0.0633715	-0.251039	normal	3.65162e-175	-4.10846	down	7.20804e-59	-3.78037	down		0.850366	-0.0866737	normal	0.00202049	-0.307765	normal	0.0700108	-0.399986	normal	0.770115	0.066643	normal	1.64466e-07	3.86672	up	Cellular Component: photosystem I (GO:0009522);; Cellular Component: photosystem II (GO:0009523);; Cellular Component: chloroplast thylakoid membrane (GO:0009535);; Biological Process: photosynthesis, light harvesting (GO:0009765);; Cellular Component: integral component of membrane (GO:0016021);; Molecular Function: chlorophyll binding (GO:0016168);; Biological Process: protein-chromophore linka…	K08907|5.9e-143|gab:108489456|K08907 light-harvesting complex I chlorophyll a/b binding protein 1 | (RefSeq) chlorophyll a-b binding protein 6, chloroplastic-like	Photosynthesis - antenna proteins (ko00196)	Chlorophyll A-B binding protein	Chlorophyll a-b binding protein 6, chloroplastic OS=Arabidopsis thaliana OX=3702 GN=LHCA1 PE=1 SV=1	PREDICTED: chlorophyll a-b binding protein 6, chloroplastic-like [Gossypium hirsutum]	cellular component: cell (GO:0005623);; cellular component: membrane (GO:0016020);; cellular component: macromolecular complex (GO:0032991);; cellular component: membrane part (GO:0044425);; cellular component: cell part (GO:0044464);; cellular component: organelle (GO:0043226);; cellular component: organelle part (GO:0044422);; biological process: metabolic process (GO:0008152);; biological proc…
Gh_A05G077100	362	DIVARICATA	0.367418	-0.243486	normal	0.332864	-0.332454	normal	9.05778e-23	-2.45961	down	9.90036e-07	-4.89786	down	4.47688e-05	-1.07951	down	0.571379	-0.20764	normal	2.83175e-17	-2.18116	down	5.08577e-16	-3.22464	down		0.975115	0.0282938	normal	0.00595045	-0.801922	normal	0.84988	0.134413	normal	0.426688	0.317829	normal	--	--	--	Molecular Function: DNA binding (GO:0003677);; Cellular Component: nucleus (GO:0005634);;	K08869|1.6e-33|cre:CHLREDRAFT_165812|K08869 aarF domain-containing kinase | (RefSeq) predicted protein	--	Myb-like DNA-binding domain	Transcription factor DIVARICATA OS=Antirrhinum majus OX=4151 GN=DIVARICATA PE=2 SV=1	PREDICTED: transcription factor DIVARICATA-like [Gossypium hirsutum]	molecular function: binding (GO:0005488);; cellular component: cell (GO:0005623);; cellular component: organelle (GO:0043226);; cellular component: cell part (GO:0044464)
Gh_A05G077200	363	IRX12	0.0621842	-0.733311	normal	0.361863	0.291953	normal	1.55588e-05	-0.997679	normal	7.98407e-08	-2.85935	down	0.0813127	0.409806	normal	0.305113	-0.296386	normal	0.00283441	-0.815593	normal	2.34225e-06	-1.25995	down		0.900182	-0.0924986	normal	0.00177414	1.05498	up	0.0489869	-0.701676	normal	0.767908	0.100319	normal	0.0103056	1.52789	up	Molecular Function: ferroxidase activity (GO:0004322);; Molecular Function: copper ion binding (GO:0005507);; Cellular Component: plasma membrane (GO:0005886);; Biological Process: iron ion transport (GO:0006826);; Biological Process: lignin catabolic process (GO:0046274);; Cellular Component: apoplast (GO:0048046);; Molecular Function: hydroquinone:oxygen oxidoreductase activity (GO:0052716);; B…	K05909|0.0e+00|ghi:107959171|K05909 laccase [EC:1.10.3.2] | (RefSeq) laccase-4-like	--	Multicopper oxidase	Laccase-4 OS=Arabidopsis thaliana OX=3702 GN=IRX12 PE=2 SV=2	PREDICTED: laccase-4-like [Gossypium hirsutum]	biological process: metabolic process (GO:0008152);; biological process: single-organism process (GO:0044699);; molecular function: catalytic activity (GO:0003824);; molecular function: binding (GO:0005488);; cellular component: cell (GO:0005623);; cellular component: membrane (GO:0016020);; cellular component: cell part (GO:0044464);; biological process: localization (GO:0051179);; biological pr…
Gh_A05G078700	364	Gh_A05G078700	--	--	--	0.995867	-0.00458812	normal	0.0325913	1.15134	up	0.227396	-0.998092	normal	6.3615e-06	-1.35381	down	0.297845	-0.433268	normal	0.0373965	0.499624	normal	0.00166466	-0.985146	normal		0.559184	0.654138	normal	0.0154856	1.2692	up	0.79935	0.208016	normal	0.92588	0.026678	normal	0.184148	0.706664	normal	--	--	--	--	--	PREDICTED: uncharacterized protein LOC107959152 isoform X1 [Gossypium hirsutum]	--
Gh_A05G080600	365	ZIP1	--	--	--	--	--	--	--	--	--	--	--	--	0.0572986	0.682486	normal	0.0151385	0.868259	normal	0.0736943	0.679912	normal	0.513678	-0.339128	normal		0.105567	2.57181	normal	1.71219e-18	3.64151	up	0.0145084	1.06436	up	1.16615e-16	3.26162	up	0.00599472	1.93296	up	Cellular Component: integral component of membrane (GO:0016021);; Molecular Function: metal ion transmembrane transporter activity (GO:0046873);;	K14709|1.6e-183|ghi:107959132|K14709 solute carrier family 39 (zinc transporter), member 1/2/3 | (RefSeq) zinc transporter 2-like	--	ZIP Zinc transporter	Zinc transporter 1 OS=Oryza sativa subsp. japonica OX=39947 GN=ZIP1 PE=1 SV=1	PREDICTED: zinc transporter 2-like [Gossypium hirsutum]	cellular component: membrane (GO:0016020);; cellular component: membrane part (GO:0044425);; biological process: localization (GO:0051179);; molecular function: transporter activity (GO:0005215)
Gh_A05G080900	366	ICMT	--	--	--	--	--	--	0.0459008	1.21211	up	0.811198	-0.225026	normal	0.000199883	-1.91732	down	4.9413e-05	-2.15575	down	0.00848972	1.0512	up	0.107954	-0.790717	normal		0.809869	0.474666	normal	--	--	--	--	--	--	0.0664445	0.3366	normal	0.9104	-0.0516687	normal	Cellular Component: integral component of membrane (GO:0016021);;	--	--	Phospholipid methyltransferase	--	PREDICTED: uncharacterized protein LOC107959130 [Gossypium hirsutum]	cellular component: membrane (GO:0016020);; cellular component: membrane part (GO:0044425)
Gh_A05G083700	367	Gh_A05G083700	0.161224	-2.08754	normal	0.111971	-2.26333	normal	0.278276	0.838699	normal	0.15806	1.38132	normal	0.00825543	-1.78278	down	1.82914e-11	-3.76537	down	0.390445	-0.373338	normal	0.184903	-0.689302	normal		0.964083	0.192178	normal	0.636539	0.493326	normal	--	--	--	8.62261e-06	-0.985038	normal	4.60928e-05	-1.83576	down	Cellular Component: extracellular region (GO:0005576);; Biological Process: defense response (GO:0006952);;	K12173|1.3e-25|gmx:100794341|K12173 BRCA1-A complex subunit BRE | (RefSeq) BRISC and BRCA1-A complex member 2	Homologous recombination (ko03440)	Thaumatin family	Osmotin-like protein OS=Solanum lycopersicum OX=4081 PE=1 SV=1	PREDICTED: osmotin-like protein [Gossypium hirsutum]	cellular component: extracellular region (GO:0005576);; biological process: response to stimulus (GO:0050896)
Gh_A05G083800	368	UBC7	0.560553	0.339445	normal	0.784333	0.159961	normal	0.00641328	1.3402	up	2.37327e-16	3.7372	up	--	--	--	0.259349	0.465897	normal	0.0514739	-0.899472	normal	1.93934e-16	2.2799	up		0.997648	0.00552298	normal	0.0425254	-1.01498	down	0.604196	0.289903	normal	7.52393e-09	-2.23008	down	5.03311e-08	-1.42637	down	Biological Process: protein polyubiquitination (GO:0000209);; Molecular Function: ATP binding (GO:0005524);; Biological Process: ubiquitin-dependent protein catabolic process (GO:0006511);; Molecular Function: ubiquitin conjugating enzyme activity (GO:0061631);;	K10575|6.4e-93|ghi:107959094|K10575 ubiquitin-conjugating enzyme E2 G1 [EC:2.3.2.23] | (RefSeq) ubiquitin-conjugating enzyme E2 7-like isoform X1	Ubiquitin mediated proteolysis (ko04120);; Protein processing in endoplasmic reticulum (ko04141)	Ubiquitin-conjugating enzyme	Ubiquitin-conjugating enzyme E2 7 OS=Arabidopsis thaliana OX=3702 GN=UBC7 PE=1 SV=1	PREDICTED: ubiquitin-conjugating enzyme E2 7-like isoform X1 [Gossypium hirsutum]	biological process: metabolic process (GO:0008152);; biological process: cellular process (GO:0009987);; molecular function: binding (GO:0005488);; molecular function: catalytic activity (GO:0003824)
Gh_A05G089700	369	kup	--	--	--	0.465184	-0.805686	normal	0.137165	-1.24969	normal	8.40314e-05	-5.82079	down	0.253332	0.653161	normal	0.289544	-0.715573	normal	0.528728	-0.403132	normal	--	--	--		0.643754	-0.871309	normal	8.27369e-05	1.70968	up	--	--	--	0.996023	0.00317503	normal	--	--	--	Cellular Component: integral component of membrane (GO:0016021);;	--	--	--	--	PREDICTED: uncharacterized protein LOC108452205 [Gossypium arboreum]	cellular component: membrane (GO:0016020);; cellular component: membrane part (GO:0044425)
Gh_A05G092400	370	At5g60760	0.100812	-0.902636	normal	0.422717	-0.736392	normal	0.734758	0.170504	normal	0.00150804	1.83479	up	0.010042	-1.19636	down	0.000241421	-1.71449	down	4.24027e-05	-1.5153	down	0.00237008	-1.15153	down		0.935015	0.149274	normal	0.857073	-0.139673	normal	0.450356	-0.848307	normal	2.50837e-08	-1.51689	down	1.95416e-17	-2.80087	down	Biological Process: alcohol metabolic process (GO:0006066);; Biological Process: phosphorus metabolic process (GO:0006793);; Biological Process: phosphate-containing compound metabolic process (GO:0006796);; Biological Process: biological_process (GO:0008150);; Biological Process: metabolic process (GO:0008152);; Biological Process: biosynthetic process (GO:0009058);; Biological Process: cellular…	--	--	AAA domain	P-loop NTPase domain-containing protein LPA1 homolog 1 OS=Arabidopsis thaliana OX=3702 GN=At5g60760 PE=2 SV=1	hypothetical protein ES319_A05G110500v1 [Gossypium barbadense]	biological process: metabolic process (GO:0008152);; biological process: single-organism process (GO:0044699);; biological process: cellular process (GO:0009987)
Gh_A05G093600	371	SGO2	--	--	--	0.294609	-3.19146	normal	--	--	--	2.03046e-05	-6.17011	down	0.000127337	-2.47919	down	0.000266944	-5.88154	down	0.00730862	-4.07673	down	2.70755e-12	-9.35927	down		0.974205	-0.105583	normal	--	--	--	--	--	--	--	--	--	--	--	--	Cellular Component: chromosome, centromeric region (GO:0000775);; Cellular Component: nucleus (GO:0005634);; Biological Process: meiotic chromosome segregation (GO:0045132);;	--	--	Shugoshin C terminus	SHUGOSHIN 2 OS=Arabidopsis thaliana OX=3702 GN=SGO2 PE=2 SV=1	PREDICTED: shugoshin-1-like [Gossypium hirsutum]	cellular component: cell (GO:0005623);; cellular component: organelle (GO:0043226);; cellular component: organelle part (GO:0044422);; cellular component: cell part (GO:0044464);; biological process: reproduction (GO:0000003);; biological process: cellular process (GO:0009987);; biological process: reproductive process (GO:0022414);; biological process: single-organism process (GO:0044699)
Gh_A05G100800	372	MLO13	--	--	--	--	--	--	--	--	--	--	--	--	0.29189	1.82001	normal	--	--	--	--	--	--	--	--	--		--	--	--	0.00830045	1.16144	up	--	--	--	--	--	--	--	--	--	Molecular Function: calmodulin binding (GO:0005516);; Biological Process: defense response (GO:0006952);; Biological Process: response to biotic stimulus (GO:0009607);; Cellular Component: integral component of membrane (GO:0016021);;	K08472|1.5e-253|gab:108452325|K08472 mlo protein | (RefSeq) MLO-like protein 13	--	Mlo family	MLO-like protein 13 OS=Arabidopsis thaliana OX=3702 GN=MLO13 PE=2 SV=1	hypothetical protein ES332_A05G122900v1 [Gossypium tomentosum]	molecular function: binding (GO:0005488);; biological process: response to stimulus (GO:0050896);; cellular component: membrane (GO:0016020);; cellular component: membrane part (GO:0044425)
Gh_A05G101200	373	CRK2	0.367295	0.512775	normal	0.034099	0.859398	normal	0.0136183	-1.05188	down	0.235499	-0.623216	normal	--	--	--	0.00294137	1.41697	up	--	--	--	0.491399	0.334919	normal		0.150849	-1.00486	normal	0.00262458	-1.43676	down	0.413174	-0.466281	normal	0.191174	-1.23548	normal	0.967169	-0.0219389	normal	Molecular Function: protein kinase activity (GO:0004672);; Molecular Function: ATP binding (GO:0005524);; Cellular Component: integral component of membrane (GO:0016021);;	K13459|4.4e-65|jcu:105634805|K13459 disease resistance protein RPS2 | (RefSeq) probable disease resistance protein At1g12280 isoform X1	Plant-pathogen interaction (ko04626)	Protein kinase domain	Cysteine-rich receptor-like protein kinase 2 OS=Arabidopsis thaliana OX=3702 GN=CRK2 PE=1 SV=1	hypothetical protein ES288_A05G121900v1 [Gossypium darwinii]	biological process: metabolic process (GO:0008152);; biological process: cellular process (GO:0009987);; molecular function: catalytic activity (GO:0003824);; molecular function: binding (GO:0005488);; cellular component: membrane (GO:0016020);; cellular component: membrane part (GO:0044425)
Gh_A05G103000	374	PHL6	0.0267226	-0.6909	normal	2.65916e-05	-1.60087	down	5.2204e-78	-6.78768	down	1.27935e-18	-13.4975	down	1.18329e-16	-1.02366	down	6.28651e-17	-1.6773	down	2.33487e-213	-5.84291	down	8.50349e-39	-1.84281	down		0.94861	-0.0688892	normal	0.00311193	-0.392759	normal	0.773693	-0.163009	normal	0.053864	0.870483	normal	1.17055e-14	11.6076	up	Molecular Function: DNA binding (GO:0003677);; Cellular Component: nucleus (GO:0005634);;	K14491|2.3e-10|thj:104813542|K14491 two-component response regulator ARR-B family | (RefSeq) two-component response regulator ARR18-like	Plant hormone signal transduction (ko04075)	MYB-CC type transfactor, LHEQLE motif	Myb family transcription factor PHL6 OS=Arabidopsis thaliana OX=3702 GN=PHL6 PE=2 SV=1	PREDICTED: uncharacterized protein LOC107958474 [Gossypium hirsutum]	molecular function: binding (GO:0005488);; cellular component: cell (GO:0005623);; cellular component: organelle (GO:0043226);; cellular component: cell part (GO:0044464)
Gh_A05G114100	375	AUX22	0.746254	-0.148322	normal	0.0672306	-0.76381	normal	0.125757	-0.74369	normal	1.80653e-09	-3.5031	down	0.479128	0.238304	normal	8.24022e-14	-2.7357	down	1.71669e-05	-1.19469	down	8.1447e-08	-1.82799	down		0.181383	0.614572	normal	0.00308887	1.00988	up	0.0139829	-1.3692	down	0.732654	0.169105	normal	0.000970256	2.30886	up	Cellular Component: nucleus (GO:0005634);; Biological Process: regulation of transcription, DNA-templated (GO:0006355);; Biological Process: auxin-activated signaling pathway (GO:0009734);;	K14484|2.7e-100|ghi:107940950|K14484 auxin-responsive protein IAA | (RefSeq) auxin-induced protein AUX22-like	Plant hormone signal transduction (ko04075)	AUX/IAA family	Auxin-induced protein AUX22 OS=Glycine max OX=3847 GN=AUX22 PE=2 SV=1	PREDICTED: auxin-induced protein AUX22-like [Gossypium hirsutum]	cellular component: cell (GO:0005623);; cellular component: organelle (GO:0043226);; cellular component: cell part (GO:0044464);; biological process: biological regulation (GO:0065007);; biological process: cellular process (GO:0009987);; biological process: signaling (GO:0023052);; biological process: single-organism process (GO:0044699);; biological process: response to stimulus (GO:0050896)
Gh_A05G115500	376	CES101	--	--	--	--	--	--	0.016814	2.64187	up	--	--	--	0.0152691	1.11889	up	0.00279933	1.28825	up	2.90917e-06	1.6068	up	--	--	--		--	--	--	0.459255	1.61195	normal	2.86071e-06	2.32487	up	0.0138526	0.690826	normal	--	--	--	Molecular Function: protein serine/threonine kinase activity (GO:0004674);; Molecular Function: ATP binding (GO:0005524);; Cellular Component: plasma membrane (GO:0005886);; Biological Process: protein phosphorylation (GO:0006468);; Cellular Component: integral component of membrane (GO:0016021);; Molecular Function: carbohydrate binding (GO:0030246);;	K24104|2.1e-72|thj:104799061|K24104 GPN-loop GTPase | (RefSeq) LOW QUALITY PROTEIN: uncharacterized protein LOC104799061	--	Protein kinase domain	G-type lectin S-receptor-like serine/threonine-protein kinase CES101 OS=Arabidopsis thaliana OX=3702 GN=CES101 PE=2 SV=2	PREDICTED: G-type lectin S-receptor-like serine/threonine-protein kinase CES101 isoform X1 [Gossypium hirsutum]	biological process: metabolic process (GO:0008152);; biological process: cellular process (GO:0009987);; molecular function: catalytic activity (GO:0003824);; molecular function: binding (GO:0005488);; cellular component: cell (GO:0005623);; cellular component: membrane (GO:0016020);; cellular component: cell part (GO:0044464);; cellular component: membrane part (GO:0044425)
Gh_A05G115800	377	OFP17	--	--	--	0.298384	-0.941674	normal	0.104251	-1.24038	normal	6.16647e-05	-5.12125	down	5.51379e-09	-2.73846	down	0.0975063	-2.86008	normal	8.19269e-07	-2.88264	down	1.94999e-13	-5.61568	down		0.933412	0.177051	normal	--	--	--	--	--	--	--	--	--	--	--	--	--	K11273|9.5e-76|dzi:111274528|K11273 chromosome transmission fidelity protein 1 [EC:3.6.4.13] | (RefSeq) LOW QUALITY PROTEIN: ATP-dependent DNA helicase DDX11	--	--	--	hypothetical protein ES319_A05G134700v1 [Gossypium barbadense]	--
Gh_A05G119300	378	IQD14	--	--	--	--	--	--	0.533123	-0.64911	normal	--	--	--	0.00450004	-1.39167	down	0.000215804	-3.39059	down	0.0155433	-1.30886	down	0.000139368	-3.19467	down		0.822078	0.587614	normal	--	--	--	--	--	--	0.955717	-0.036109	normal	--	--	--	Molecular Function: protein binding (GO:0005515);; Cellular Component: cellular_component (GO:0005575);; Cellular Component: intracellular (GO:0005622);; Cellular Component: cell (GO:0005623);; Cellular Component: cytoplasm (GO:0005737);; Cellular Component: cytosol (GO:0005829);; Cellular Component: cytoskeleton (GO:0005856);; Cellular Component: microtubule associated complex (GO:0005875);; Cel…	--	--	Protein of unknown function (DUF4005)	--	PREDICTED: protein IQ-DOMAIN 14-like [Gossypium hirsutum]	molecular function: binding (GO:0005488);; cellular component: cell (GO:0005623);; cellular component: cell part (GO:0044464);; cellular component: organelle (GO:0043226);; cellular component: macromolecular complex (GO:0032991);; cellular component: organelle part (GO:0044422);; cellular component: membrane (GO:0016020)
Gh_A05G122000	379	TMN7	--	--	--	--	--	--	0.0711766	-1.74449	normal	0.295826	1.25101	normal	0.220284	-0.703155	normal	0.00439751	-1.81336	down	0.146677	-0.999495	normal	0.0893416	-1.29309	normal		0.82846	-0.600731	normal	0.00272917	1.62137	up	--	--	--	0.793382	0.183899	normal	8.59116e-06	-3.09562	down	Cellular Component: integral component of membrane (GO:0016021);;	K17086|2.4e-307|gab:108453354|K17086 transmembrane 9 superfamily member 2/4 | (RefSeq) transmembrane 9 superfamily member 7-like	--	Endomembrane protein 70	Transmembrane 9 superfamily member 7 OS=Arabidopsis thaliana OX=3702 GN=TMN7 PE=2 SV=1	hypothetical protein ES332_A05G145100v1 [Gossypium tomentosum]	cellular component: membrane (GO:0016020);; cellular component: membrane part (GO:0044425)
Gh_A05G124000	380	APM1	--	--	--	--	--	--	--	--	--	0.407331	0.499343	normal	0.0119381	-1.56691	down	0.0206319	-4.56102	down	0.000316696	-1.76137	down	0.120796	-1.25505	normal		0.250684	1.00514	normal	--	--	--	--	--	--	--	--	--	0.488326	-0.719479	normal	Molecular Function: aminopeptidase activity (GO:0004177);; Molecular Function: metallopeptidase activity (GO:0008237);; Molecular Function: zinc ion binding (GO:0008270);;	K08776|0.0e+00|gra:105767355|K08776 puromycin-sensitive aminopeptidase [EC:3.4.11.-] | (RefSeq) aminopeptidase M1-like	--	Peptidase family M1 domain	Aminopeptidase M1 OS=Arabidopsis thaliana OX=3702 GN=APM1 PE=1 SV=1	hypothetical protein ES319_A05G143300v1 [Gossypium barbadense]	biological process: metabolic process (GO:0008152);; molecular function: catalytic activity (GO:0003824);; molecular function: binding (GO:0005488)
Gh_A05G124700	381	SAUR50	0.14611	1.04022	normal	1.04103e-25	3.90734	up	0.291519	0.501173	normal	--	--	--	5.13914e-18	-2.41885	down	6.25698e-05	-1.62878	down	2.37445e-14	-2.44965	down	0.00287999	-0.755587	normal		9.46615e-26	2.53807	up	0.217829	-0.932417	normal	4.75695e-11	-3.01595	down	0.431694	-0.405565	normal	1.98801e-05	1.67473	up	Biological Process: response to auxin (GO:0009733);;	--	--	Auxin responsive protein	Auxin-responsive protein SAUR77 OS=Arabidopsis thaliana OX=3702 GN=SAUR77 PE=1 SV=1	PREDICTED: auxin-responsive protein SAUR41-like [Gossypium hirsutum]	biological process: response to stimulus (GO:0050896)
Gh_A05G127000	382	GLIP1	0.733115	0.28766	normal	0.450163	0.565055	normal	0.00349807	1.83895	up	1.98309e-09	4.21274	up	0.885062	0.127507	normal	0.367741	0.454579	normal	0.94211	-0.0714312	normal	1.39592e-10	3.7774	up		0.236658	1.36681	normal	3.22349e-05	1.22408	up	6.89744e-05	1.23849	up	0.490296	-0.542626	normal	1.05634e-06	0.952226	normal	Cellular Component: vacuolar membrane (GO:0005774);; Molecular Function: lipase activity (GO:0016298);;	K00679|3.1e-33|cic:CICLE_v10027727mg|K00679 phospholipid:diacylglycerol acyltransferase [EC:2.3.1.158] | (RefSeq) hypothetical protein	Glycerolipid metabolism (ko00561)	GDSL-like Lipase/Acylhydrolase	GDSL esterase/lipase 1 OS=Arabidopsis thaliana OX=3702 GN=GLIP1 PE=1 SV=1	PREDICTED: GDSL esterase/lipase 1-like [Gossypium hirsutum]	cellular component: cell (GO:0005623);; cellular component: membrane (GO:0016020);; cellular component: organelle (GO:0043226);; cellular component: organelle part (GO:0044422);; cellular component: cell part (GO:0044464);; molecular function: catalytic activity (GO:0003824)
Gh_A05G129000	383	At5g10370	--	--	--	0.000141296	1.83499	up	3.06525e-58	5.37278	up	2.06455e-29	5.80801	up	6.9411e-06	1.4896	up	0.0119346	1.06094	up	0.000170281	1.47254	up	1.25861e-15	2.65278	up		0.00240893	2.06365	up	9.97845e-25	2.58481	up	0.000167483	1.27309	up	9.78833e-15	-1.81948	down	0.000831634	-1.06887	down	Molecular Function: ubiquitin-protein transferase activity (GO:0004842);; Molecular Function: metal ion binding (GO:0046872);;	K11975|1.8e-138|gab:108450927|K11975 E3 ubiquitin-protein ligase RNF144 [EC:2.3.2.31] | (RefSeq) probable E3 ubiquitin-protein ligase RNF144A-B	--	IBR domain, a half RING-finger domain	--	hypothetical protein ES288_A05G152200v1 [Gossypium darwinii]	molecular function: catalytic activity (GO:0003824);; molecular function: binding (GO:0005488)
Gh_A05G132400	384	ARF6	0.196707	0.376402	normal	0.618419	-0.139021	normal	0.850587	0.0472499	normal	4.47998e-05	1.02258	up	6.10078e-11	-1.06589	down	0.758184	-0.0624232	normal	8.37369e-05	-0.500274	normal	0.362008	0.119503	normal		0.808479	-0.118641	normal	9.95731e-12	-1.55487	down	0.882283	-0.0629658	normal	9.23573e-06	-0.66073	normal	6.2809e-11	-0.996249	normal	Molecular Function: DNA binding (GO:0003677);; Cellular Component: nucleus (GO:0005634);; Biological Process: regulation of transcription, DNA-templated (GO:0006355);; Biological Process: auxin-activated signaling pathway (GO:0009734);;	K14486|4.3e-183|nnu:104609299|K14486 auxin response factor | (RefSeq) auxin response factor 7-like	Plant hormone signal transduction (ko04075)	Auxin response factor	Auxin response factor 6 OS=Arabidopsis thaliana OX=3702 GN=ARF6 PE=1 SV=2	PREDICTED: auxin response factor 6-like isoform X1 [Gossypium hirsutum]	molecular function: binding (GO:0005488);; cellular component: cell (GO:0005623);; cellular component: organelle (GO:0043226);; cellular component: cell part (GO:0044464);; biological process: biological regulation (GO:0065007);; biological process: cellular process (GO:0009987);; biological process: signaling (GO:0023052);; biological process: single-organism process (GO:0044699);; biological pr…
Gh_A05G133500	385	Gh_A05G133500	0.0195405	2.16352	up	0.0182291	2.28801	up	--	--	--	0.860855	-0.242221	normal	1.05391e-05	3.64781	up	4.45513e-07	2.90744	up	8.94244e-05	2.52612	up	0.00234197	2.19811	up	1.48429	--	--	--	0.966588	-0.0316604	normal	0.127041	-0.931873	normal	6.42207e-07	2.07772	up	0.182486	0.920595	normal	Cellular Component: integral component of membrane (GO:0016021);;	--	--	Cotton fibre expressed protein	--	PREDICTED: uncharacterized protein LOC107959963 [Gossypium hirsutum]	cellular component: membrane (GO:0016020);; cellular component: membrane part (GO:0044425)
Gh_A05G135200	386	MCM3	--	--	--	--	--	--	--	--	--	--	--	--	3.9156e-11	-3.68653	down	0.00403988	-4.24548	down	0.0257454	-5.19681	down	1.24665e-13	-10.0651	down		0.977365	0.262014	normal	--	--	--	--	--	--	--	--	--	--	--	--	Molecular Function: DNA binding (GO:0003677);; Molecular Function: DNA helicase activity (GO:0003678);; Molecular Function: ATP binding (GO:0005524);; Cellular Component: nucleus (GO:0005634);; Biological Process: DNA replication initiation (GO:0006270);; Cellular Component: MCM complex (GO:0042555);;	K02541|0.0e+00|gab:108450649|K02541 DNA replication licensing factor MCM3 [EC:3.6.4.12] | (RefSeq) DNA replication licensing factor MCM3-like	DNA replication (ko03030)	MCM P-loop domain	DNA replication licensing factor MCM3 OS=Arabidopsis thaliana OX=3702 GN=MCM3 PE=1 SV=1	PREDICTED: DNA replication licensing factor MCM3-like isoform X2 [Gossypium hirsutum]	molecular function: binding (GO:0005488);; molecular function: catalytic activity (GO:0003824);; cellular component: cell (GO:0005623);; cellular component: organelle (GO:0043226);; cellular component: cell part (GO:0044464);; biological process: metabolic process (GO:0008152);; biological process: cellular process (GO:0009987);; cellular component: macromolecular complex (GO:0032991)
Gh_A05G139000	387	BHLH35	--	--	--	0.657709	-1.75184	normal	0.0634012	-3.83916	normal	1.69321e-06	-9.82434	down	1.22597e-05	-2.34684	down	0.0830839	-4.19212	normal	0.0345767	-3.64767	down	1.13591e-12	-9.51263	down		0.883637	-0.585434	normal	--	--	--	--	--	--	--	--	--	--	--	--	--	--	--	--	--	hypothetical protein GOBAR_AA32226 [Gossypium barbadense]	--
Gh_A05G139700	388	NAT2	--	--	--	--	--	--	--	--	--	0.822912	0.295313	normal	0.000404131	-2.30491	down	0.0241302	-3.51295	down	3.48346e-05	-2.02746	down	0.00479131	-5.15707	down		0.794342	0.652276	normal	--	--	--	--	--	--	0.699298	-0.220713	normal	0.0821942	-4.76254	normal	Cellular Component: integral component of membrane (GO:0016021);; Molecular Function: transmembrane transporter activity (GO:0022857);;	K14611|1.1e-175|cann:107862422|K14611 solute carrier family 23 (nucleobase transporter), member 1 | (RefSeq) nucleobase-ascorbate transporter 6	--	Permease family	Nucleobase-ascorbate transporter 2 OS=Arabidopsis thaliana OX=3702 GN=NAT2 PE=2 SV=2	hypothetical protein ES319_A05G160900v1 [Gossypium barbadense]	cellular component: membrane (GO:0016020);; cellular component: membrane part (GO:0044425);; biological process: localization (GO:0051179);; molecular function: transporter activity (GO:0005215)
Gh_A05G141000	389	HIPP28	--	--	--	--	--	--	--	--	--	--	--	--	0.0921533	0.688016	normal	--	--	--	0.213209	-0.562606	normal	0.901198	0.0569568	normal		--	--	--	5.35066e-09	2.53787	up	--	--	--	0.550091	0.304453	normal	0.0308828	1.62382	up	Biological Process: metal ion transport (GO:0030001);; Molecular Function: metal ion binding (GO:0046872);;	K12848|2.5e-08|dzi:111295277|K12848 U4/U6.U5 tri-snRNP component SNU23 | (RefSeq) zinc finger matrin-type protein 2 isoform X1	Spliceosome (ko03040)	Heavy-metal-associated domain	Heavy metal-associated isoprenylated plant protein 28 OS=Arabidopsis thaliana OX=3702 GN=HIPP28 PE=3 SV=1	PREDICTED: heavy metal-associated isoprenylated plant protein 20-like isoform X1 [Gossypium hirsutum]	biological process: localization (GO:0051179);; molecular function: binding (GO:0005488)
Gh_A05G143500	390	PTI5	--	--	--	--	--	--	3.331e-21	5.42548	up	2.05421e-12	5.68722	up	0.00300771	1.83581	up	0.0363902	1.43982	up	0.000642465	2.15523	up	1.92779e-08	3.16549	up		--	--	--	2.42183e-08	2.62501	up	0.029001	1.08647	up	0.00159722	-1.05016	down	0.412292	-0.28384	normal	Molecular Function: DNA binding (GO:0003677);; Molecular Function: transcription factor activity, sequence-specific DNA binding (GO:0003700);; Cellular Component: nucleus (GO:0005634);;	K13433|5.5e-88|gab:108452500|K13433 pathogenesis-related genes transcriptional activator PTI5 | (RefSeq) pathogenesis-related genes transcriptional activator PTI5-like	Plant-pathogen interaction (ko04626)	AP2 domain	Pathogenesis-related genes transcriptional activator PTI5 OS=Solanum lycopersicum OX=4081 GN=PTI5 PE=2 SV=1	PREDICTED: pathogenesis-related genes transcriptional activator PTI5-like [Gossypium arboreum]	molecular function: binding (GO:0005488);; biological process: biological regulation (GO:0065007);; molecular function: nucleic acid binding transcription factor activity (GO:0001071);; cellular component: cell (GO:0005623);; cellular component: organelle (GO:0043226);; cellular component: cell part (GO:0044464)
Gh_A05G144100	391	GRXC9	8.35052e-07	0.88814	normal	1.01545e-08	0.977949	normal	3.42988e-08	1.23027	up	1.40427e-20	2.02055	up	6.1251e-14	1.3126	up	2.67428e-19	1.8562	up	4.4466e-13	1.1816	up	2.02551e-10	1.14868	up		0.855929	-0.119233	normal	0.0672303	0.314235	normal	0.00010176	0.739815	normal	0.401039	-0.162182	normal	2.98236e-09	-0.965604	normal	Molecular Function: electron carrier activity (GO:0009055);; Molecular Function: protein disulfide oxidoreductase activity (GO:0015035);;	K03676|9.4e-56|dzi:111318723|K03676 glutaredoxin 3 | (RefSeq) glutaredoxin-C9	--	Glutaredoxin	Glutaredoxin-C9 OS=Arabidopsis thaliana OX=3702 GN=GRXC9 PE=1 SV=1	PREDICTED: glutaredoxin-C9-like [Gossypium hirsutum]	molecular function: electron carrier activity (GO:0009055);; biological process: metabolic process (GO:0008152);; biological process: single-organism process (GO:0044699);; molecular function: catalytic activity (GO:0003824)
Gh_A05G147600	392	DOF1.7	0.16703	-0.714098	normal	0.00936026	-1.57602	down	5.25787e-05	-2.59831	down	0.00425219	-1.86607	down	3.10149e-07	-1.30078	down	3.26925e-15	-2.09789	down	9.26811e-34	-3.1694	down	1.07973e-08	-1.26735	down		0.306125	0.732437	normal	0.756758	0.155167	normal	0.829516	0.19932	normal	--	--	--	0.000634186	1.35111	up	Molecular Function: DNA binding (GO:0003677);; Cellular Component: nucleus (GO:0005634);; Biological Process: regulation of transcription, DNA-templated (GO:0006355);;	K20043|3.5e-23|aip:107640400|K20043 clathrin coat assembly protein AP180 | (RefSeq) putative clathrin assembly protein At5g35200	--	Dof domain, zinc finger	Dof zinc finger protein DOF1.4 OS=Arabidopsis thaliana OX=3702 GN=DOF1.4 PE=2 SV=1	hypothetical protein ES332_A05G176400v1 [Gossypium tomentosum]	molecular function: binding (GO:0005488);; cellular component: cell (GO:0005623);; cellular component: organelle (GO:0043226);; cellular component: cell part (GO:0044464);; biological process: biological regulation (GO:0065007)
Gh_A05G148800	393	Gh_A05G148800	--	--	--	0.0469589	-2.02087	down	0.0321915	-1.88518	down	1.15586e-05	-5.29235	down	0.000166945	-1.82675	down	3.0119e-09	-3.39845	down	7.82394e-05	-1.71188	down	7.27079e-16	-5.48083	down		0.994939	-0.0217104	normal	--	--	--	--	--	--	0.739471	0.179511	normal	--	--	--	--	--	--	--	--	hypothetical protein ES319_A05G171700v1 [Gossypium barbadense]	--
Gh_A05G150700	394	CBP60B	0.340026	-0.290838	normal	0.664022	-0.166777	normal	0.0401277	-0.402621	normal	4.34466e-13	-2.07555	down	6.45879e-13	1.13806	up	0.00580703	0.685356	normal	0.00758023	0.423671	normal	2.92128e-08	-1.20359	down		0.430709	-0.258272	normal	3.54828e-08	1.17611	up	0.182351	0.574715	normal	0.000476815	0.578047	normal	0.0937296	0.638627	normal	Molecular Function: transcription factor activity, sequence-specific DNA binding (GO:0003700);; Molecular Function: calmodulin binding (GO:0005516);; Cellular Component: nucleus (GO:0005634);; Molecular Function: sequence-specific DNA binding (GO:0043565);; Biological Process: regulation of salicylic acid biosynthetic process (GO:0080142);;	--	--	Calmodulin binding protein-like	Calmodulin-binding protein 60 B OS=Arabidopsis thaliana OX=3702 GN=CBP60B PE=2 SV=1	PREDICTED: calmodulin-binding protein 60 B-like [Gossypium hirsutum]	biological process: biological regulation (GO:0065007);; molecular function: nucleic acid binding transcription factor activity (GO:0001071);; molecular function: binding (GO:0005488);; cellular component: cell (GO:0005623);; cellular component: organelle (GO:0043226);; cellular component: cell part (GO:0044464)
Gh_A05G151800	395	MFT	8.66679e-05	6.88093	up	9.34507e-06	7.42263	up	1.49282e-09	8.89731	up	1.39507e-05	10.2562	up	1.15995e-12	9.69705	up	5.26872e-14	9.85967	up	1.10223e-15	9.97699	up	5.53006e-18	10.844	up	2.81612	--	--	--	0.473766	-0.844655	normal	0.02135	-1.25838	down	1.62485e-30	-2.59257	down	3.40214e-28	-3.07425	down	--	K06910|5.1e-56|bna:106351424|K06910 phosphatidylethanolamine-binding protein | (RefSeq) protein MOTHER of FT and TFL1	--	Phosphatidylethanolamine-binding protein	Protein MOTHER of FT and TFL1 OS=Arabidopsis thaliana OX=3702 GN=MFT PE=1 SV=1	PREDICTED: protein MOTHER of FT and TFL1-like isoform X1 [Gossypium hirsutum]	--
Gh_A05G152100	396	CYCD6-1	--	--	--	0.532833	-2.32028	normal	--	--	--	5.7955e-07	-9.96466	down	3.08203e-06	-2.14251	down	1.08194e-15	-10.3633	down	2.94519e-05	-4.71	down	0.000209088	-6.43575	down		0.965566	0.200975	normal	--	--	--	--	--	--	--	--	--	--	--	--	Biological Process: regulation of cyclin-dependent protein serine/threonine kinase activity (GO:0000079);; Cellular Component: cyclin-dependent protein kinase holoenzyme complex (GO:0000307);; Cellular Component: nucleus (GO:0005634);; Cellular Component: cytoplasm (GO:0005737);; Molecular Function: cyclin-dependent protein serine/threonine kinase regulator activity (GO:0016538);; Cellular Compon…	K18812|3.2e-181|ghi:107938215|K18812 cyclin D6, plant | (RefSeq) putative cyclin-D6-1	--	Cyclin, N-terminal domain	Putative cyclin-D6-1 OS=Arabidopsis thaliana OX=3702 GN=CYCD6-1 PE=3 SV=1	PREDICTED: putative cyclin-D6-1 [Gossypium hirsutum]	biological process: biological regulation (GO:0065007);; cellular component: cell (GO:0005623);; cellular component: macromolecular complex (GO:0032991);; cellular component: cell part (GO:0044464);; cellular component: organelle (GO:0043226);; molecular function: molecular function regulator (GO:0098772);; cellular component: other organism (GO:0044215);; cellular component: other organism part …
Gh_A05G152400	397	RKS1	0.5606	1.2617	normal	0.241717	1.54931	normal	0.609786	0.690514	normal	0.101981	-4.07389	normal	0.00011608	1.78846	up	1.42755e-07	2.63122	up	6.00646e-08	2.13599	up	1.30929e-05	1.81754	up		--	--	--	0.684848	-0.271747	normal	0.74149	0.239973	normal	0.0504867	0.610404	normal	7.90363e-09	5.08198	up	Molecular Function: protein serine/threonine kinase activity (GO:0004674);; Molecular Function: ATP binding (GO:0005524);; Cellular Component: integral component of membrane (GO:0016021);; Biological Process: recognition of pollen (GO:0048544);;	K24104|9.9e-77|thj:104799061|K24104 GPN-loop GTPase | (RefSeq) LOW QUALITY PROTEIN: uncharacterized protein LOC104799061	--	Protein tyrosine and serine/threonine kinase	G-type lectin S-receptor-like serine/threonine-protein kinase At1g11410 OS=Arabidopsis thaliana OX=3702 GN=At1g11410 PE=3 SV=3	uncharacterized protein LOC110424307 [Herrania umbratica]	biological process: metabolic process (GO:0008152);; biological process: cellular process (GO:0009987);; molecular function: catalytic activity (GO:0003824);; molecular function: binding (GO:0005488);; cellular component: membrane (GO:0016020);; cellular component: membrane part (GO:0044425);; biological process: reproduction (GO:0000003);; biological process: reproductive process (GO:0022414);; …
Gh_A05G152700	398	ANR	0.190395	0.698346	normal	3.88032e-08	1.77391	up	0.354724	0.419452	normal	1.06487e-06	-2.97439	down	3.31336e-23	1.59999	up	4.81014e-26	2.07736	up	3.80258e-06	0.983882	normal	3.93582e-22	-2.65902	down		0.0438785	0.83639	normal	0.0026236	1.74052	up	3.50348e-06	1.11801	up	0.0080759	1.41933	up	0.170684	1.17777	normal	Molecular Function: catalytic activity (GO:0003824);;	K08695|1.5e-186|ghi:107938221|K08695 anthocyanidin reductase [EC:1.3.1.77] | (RefSeq) anthocyanidin reductase-like	Flavonoid biosynthesis (ko00941)	NAD dependent epimerase/dehydratase family	Anthocyanidin reductase ((2S)-flavan-3-ol-forming) OS=Vitis vinifera OX=29760 GN=ANR PE=3 SV=1	hypothetical protein GOBAR_AA11355 [Gossypium barbadense]	molecular function: catalytic activity (GO:0003824)
Gh_A05G153000	399	KIN14C	0.0135735	-1.56191	down	0.0202509	-1.54215	down	0.0184157	-1.363	down	0.600557	-0.412479	normal	1.2574e-07	-2.92009	down	1.24386e-06	-3.15309	down	3.47028e-09	-2.84221	down	0.0011921	-1.55991	down	-1.35818	0.937626	-0.188867	normal	0.00899381	-1.53981	down	0.0170648	-1.82096	down	2.14956e-06	-1.63742	down	0.000372012	-1.2943	down	Molecular Function: microtubule motor activity (GO:0003777);; Molecular Function: ATP binding (GO:0005524);; Cellular Component: kinesin complex (GO:0005871);; Cellular Component: microtubule (GO:0005874);; Biological Process: microtubule-based movement (GO:0007018);; Molecular Function: microtubule binding (GO:0008017);; Molecular Function: ATPase activity (GO:0016887);; Biological Process: spin…	K10405|0.0e+00|ghi:107958242|K10405 kinesin family member C1 | (RefSeq) kinesin-1-like	--	Kinesin motor domain	Kinesin-like protein KIN-14C OS=Arabidopsis thaliana OX=3702 GN=KIN14C PE=2 SV=1	PREDICTED: kinesin-1-like [Gossypium hirsutum]	molecular function: catalytic activity (GO:0003824);; molecular function: binding (GO:0005488);; cellular component: cell (GO:0005623);; cellular component: macromolecular complex (GO:0032991);; cellular component: organelle (GO:0043226);; cellular component: organelle part (GO:0044422);; cellular component: cell part (GO:0044464);; cellular component: supramolecular complex (GO:0099080);; biolog…
Gh_A05G159500	400	PUB4	0.00419724	-0.501806	normal	0.269305	-0.258388	normal	7.22687e-08	-0.802587	normal	0.000401592	-0.630232	normal	8.20151e-19	-1.23436	down	2.63283e-34	-1.64084	down	7.37044e-38	-1.56716	down	5.9827e-12	-1.64147	down		1.14141e-05	0.62273	normal	0.720613	-0.103663	normal	0.0004352	-0.777516	normal	0.454411	-0.131547	normal	0.302118	-0.360942	normal	Cellular Component: nucleus (GO:0005634);; Cellular Component: cytoplasm (GO:0005737);;	K08332|1.4e-09|cmos:111463552|K08332 vacuolar protein 8 | (RefSeq) U-box domain-containing protein 4-like	--	Armadillo/beta-catenin-like repeat	U-box domain-containing protein 4 OS=Arabidopsis thaliana OX=3702 GN=PUB4 PE=1 SV=3	PREDICTED: U-box domain-containing protein 4-like [Gossypium hirsutum]	cellular component: cell (GO:0005623);; cellular component: organelle (GO:0043226);; cellular component: cell part (GO:0044464)
Gh_A05G162000	401	PAT21	0.0908958	-2.36506	normal	0.0768815	-1.26461	normal	0.000418077	-1.76694	down	0.000151258	-4.30471	down	0.00298087	-1.34005	down	2.65281e-05	-3.32188	down	0.0227624	-0.851125	normal	0.00269345	-1.39671	down		0.984638	0.0385595	normal	--	--	--	--	--	--	0.0200566	0.968084	normal	--	--	--	Cellular Component: endoplasmic reticulum (GO:0005783);; Cellular Component: Golgi apparatus (GO:0005794);; Biological Process: protein targeting to membrane (GO:0006612);; Cellular Component: integral component of membrane (GO:0016021);; Biological Process: peptidyl-L-cysteine S-palmitoylation (GO:0018230);; Molecular Function: protein-cysteine S-palmitoyltransferase activity (GO:0019706);;	K20027|0.0e+00|ghi:107905754|K20027 palmitoyltransferase ZDHHC1/11 [EC:2.3.1.225] | (RefSeq) protein S-acyltransferase 21	--	DHHC palmitoyltransferase	Protein S-acyltransferase 21 OS=Arabidopsis thaliana OX=3702 GN=PAT21 PE=2 SV=1	PREDICTED: protein S-acyltransferase 21 [Gossypium hirsutum]	cellular component: cell (GO:0005623);; cellular component: organelle (GO:0043226);; cellular component: cell part (GO:0044464);; biological process: localization (GO:0051179);; cellular component: membrane (GO:0016020);; cellular component: membrane part (GO:0044425);; biological process: metabolic process (GO:0008152);; biological process: cellular process (GO:0009987);; molecular function: cat…
Gh_A05G162100	402	GLR3.3	0.0471472	-0.740938	normal	0.930362	0.0428991	normal	0.340772	0.367783	normal	0.162428	0.625646	normal	1.75443e-11	-1.28058	down	0.91708	-0.0239381	normal	0.116039	-0.265409	normal	0.00678271	0.547276	normal		0.92584	-0.108237	normal	0.00540912	-0.638124	normal	0.564048	-0.195495	normal	1.84088e-05	-0.740864	normal	0.491175	-0.165805	normal	Cellular Component: plasma membrane (GO:0005886);; Molecular Function: ligand-gated ion channel activity (GO:0015276);; Cellular Component: integral component of membrane (GO:0016021);; Molecular Function: signaling receptor activity (GO:0038023);;	K05387|0.0e+00|ghi:107905753|K05387 glutamate receptor, ionotropic, plant | (RefSeq) glutamate receptor 3.3-like	--	Receptor family ligand binding region	Glutamate receptor 3.3 OS=Arabidopsis thaliana OX=3702 GN=GLR3.3 PE=1 SV=1	PREDICTED: glutamate receptor 3.3-like [Gossypium hirsutum]	cellular component: cell (GO:0005623);; cellular component: membrane (GO:0016020);; cellular component: cell part (GO:0044464);; biological process: localization (GO:0051179);; molecular function: transporter activity (GO:0005215);; molecular function: molecular transducer activity (GO:0060089);; cellular component: membrane part (GO:0044425);; biological process: cellular process (GO:0009987);; …
Gh_A05G163400	403	ACT	0.1251	0.608044	normal	0.788486	-0.124726	normal	0.210866	-0.604746	normal	4.03815e-05	1.78821	up	3.02447e-05	0.885647	normal	0.190086	0.369983	normal	2.88163e-06	-1.62741	down	1.17619e-07	1.25238	up		0.0894756	0.924349	normal	1.16578e-12	1.21335	up	1.11959e-10	1.39867	up	0.849975	-0.0946167	normal	0.04501	0.412211	normal	Molecular Function: transferase activity, transferring acyl groups other than amino-acyl groups (GO:0016747);;	K13065|9.5e-256|gra:105771067|K13065 shikimate O-hydroxycinnamoyltransferase [EC:2.3.1.133] | (RefSeq) vinorine synthase-like	Phenylpropanoid biosynthesis (ko00940);; Flavonoid biosynthesis (ko00941);; Stilbenoid, diarylheptanoid and gingerol biosynthesis (ko00945)	Transferase family	(13S,14R)-1,13-dihydroxy-N-methylcanadine 13-O-acetyltransferase AT1 OS=Papaver somniferum OX=3469 GN=AT1 PE=1 SV=1	PREDICTED: vinorine synthase-like [Gossypium hirsutum]	molecular function: catalytic activity (GO:0003824)
Gh_A05G167500	404	CAD6	0.998943	0.00066272	normal	1.70685e-17	2.4168	up	0.538607	0.234486	normal	6.66612e-09	-3.41404	down	4.60109e-07	0.992579	normal	1.97419e-08	1.50053	up	1.47705e-05	0.957904	normal	3.77511e-06	-1.05054	down		0.196877	0.636944	normal	3.02594e-10	1.63365	up	0.443904	-0.301302	normal	8.46669e-09	1.3758	up	7.01543e-11	3.02999	up	Molecular Function: zinc ion binding (GO:0008270);; Biological Process: lignin biosynthetic process (GO:0009809);; Molecular Function: oxidoreductase activity, acting on the CH-OH group of donors, NAD or NADP as acceptor (GO:0016616);; Molecular Function: cinnamyl-alcohol dehydrogenase activity (GO:0045551);;	K00083|9.8e-180|ghi:107958204|K00083 cinnamyl-alcohol dehydrogenase [EC:1.1.1.195] | (RefSeq) probable cinnamyl alcohol dehydrogenase 6	Phenylpropanoid biosynthesis (ko00940)	Alcohol dehydrogenase GroES-like domain	Probable cinnamyl alcohol dehydrogenase 6 OS=Oryza sativa subsp. japonica OX=39947 GN=CAD6 PE=2 SV=2	PREDICTED: probable cinnamyl alcohol dehydrogenase 6 [Gossypium hirsutum]	molecular function: binding (GO:0005488);; biological process: metabolic process (GO:0008152);; biological process: cellular process (GO:0009987);; biological process: single-organism process (GO:0044699);; molecular function: catalytic activity (GO:0003824)
Gh_A05G170800	405	SAUR50	--	--	--	--	--	--	--	--	--	--	--	--	0.0115153	-1.16516	down	2.18924e-08	-3.89971	down	1.58257e-05	-2.12509	down	4.0585e-08	-3.53912	down		8.88128e-05	1.71879	up	--	--	--	--	--	--	--	--	--	--	--	--	Biological Process: response to auxin (GO:0009733);;	K14488|1.1e-53|ghi:107958237|K14488 SAUR family protein | (RefSeq) auxin-induced protein 15A-like	Plant hormone signal transduction (ko04075)	Auxin responsive protein	Auxin-responsive protein SAUR50 OS=Arabidopsis thaliana OX=3702 GN=SAUR50 PE=1 SV=1	PREDICTED: auxin-induced protein 15A-like [Gossypium hirsutum]	biological process: response to stimulus (GO:0050896)
Gh_A05G173200	406	BGAL5	0.000703213	-0.875718	normal	0.000203257	-0.902786	normal	1.13598e-06	-1.17487	down	4.09679e-44	-6.32598	down	0.437263	-0.0936744	normal	4.07061e-09	-1.48634	down	0.0199166	-0.314318	normal	3.922e-09	-1.52276	down		0.0180117	0.647209	normal	4.0707e-27	1.43171	up	0.940737	0.0455877	normal	7.55879e-20	1.52267	up	4.22476e-31	5.47846	up	Molecular Function: beta-galactosidase activity (GO:0004565);; Biological Process: carbohydrate metabolic process (GO:0005975);;	K12309|4.9e-278|csat:104711840|K12309 beta-galactosidase [EC:3.2.1.23] | (RefSeq) LOW QUALITY PROTEIN: beta-galactosidase 2	Galactose metabolism (ko00052);; Other glycan degradation (ko00511);; Glycosaminoglycan degradation (ko00531);; Sphingolipid metabolism (ko00600);; Glycosphingolipid biosynthesis - ganglio series (ko00604)	Glycosyl hydrolases family 35	Beta-galactosidase 5 OS=Arabidopsis thaliana OX=3702 GN=BGAL5 PE=2 SV=1	hypothetical protein ES319_A05G198400v1 [Gossypium barbadense]	molecular function: catalytic activity (GO:0003824);; biological process: metabolic process (GO:0008152)
Gh_A05G173400	407	CKX5	0.511418	0.695776	normal	--	--	--	--	--	--	0.495032	0.820166	normal	1.43986e-05	-2.58892	down	0.669984	-0.282854	normal	1.50913e-11	-5.23394	down	0.00228975	-1.96675	down		0.575598	1.06108	normal	2.79777e-05	-2.21538	down	--	--	--	--	--	--	0.0112612	-1.7148	down	Biological Process: cytokinin metabolic process (GO:0009690);; Molecular Function: cytokinin dehydrogenase activity (GO:0019139);; Molecular Function: FAD binding (GO:0071949);;	K00279|0.0e+00|ghi:107957953|K00279 cytokinin dehydrogenase [EC:1.5.99.12] | (RefSeq) cytokinin dehydrogenase 5-like	Zeatin biosynthesis (ko00908)	Cytokinin dehydrogenase 1, FAD and cytokinin binding	Cytokinin dehydrogenase 5 OS=Arabidopsis thaliana OX=3702 GN=CKX5 PE=2 SV=1	PREDICTED: cytokinin dehydrogenase 5-like [Gossypium hirsutum]	biological process: metabolic process (GO:0008152);; biological process: cellular process (GO:0009987);; biological process: biological regulation (GO:0065007);; biological process: single-organism process (GO:0044699);; molecular function: catalytic activity (GO:0003824);; molecular function: binding (GO:0005488)
Gh_A05G174900	408	BBD2	0.00164382	0.686752	normal	1.0224e-27	1.93496	up	8.04019e-32	2.03691	up	2.37587e-35	2.44151	up	1.09572e-08	1.11338	up	3.27009e-41	2.57417	up	4.54617e-42	2.01956	up	7.21202e-19	1.57119	up		0.813605	-0.137635	normal	0.217316	0.292598	normal	0.037066	0.480998	normal	0.367656	-0.143105	normal	1.66242e-08	-0.980648	normal	Molecular Function: nuclease activity (GO:0004518);;	K08999|7.6e-14|ppp:112285264|K08999 uncharacterized protein | (RefSeq) bifunctional nuclease 2-like	--	Domain of unknown function (DUF151)	Bifunctional nuclease 2 OS=Arabidopsis thaliana OX=3702 GN=BBD2 PE=2 SV=1	hypothetical protein ES332_A05G207300v1 [Gossypium tomentosum]	molecular function: catalytic activity (GO:0003824)
Gh_A05G175700	409	AGPS1	0.174486	0.347021	normal	0.156186	0.38168	normal	0.114321	0.376704	normal	0.00313584	0.923822	normal	1.57817e-06	0.814848	normal	0.904026	0.031055	normal	0.0249697	0.461825	normal	0.000348587	0.713093	normal		0.0795378	0.651911	normal	7.6487e-18	1.12765	up	0.266373	0.281501	normal	2.31243e-07	0.741311	normal	0.0244713	0.463155	normal	Molecular Function: ATP binding (GO:0005524);; Biological Process: glycogen biosynthetic process (GO:0005978);; Molecular Function: glucose-1-phosphate adenylyltransferase activity (GO:0008878);; Cellular Component: chloroplast (GO:0009507);; Biological Process: starch biosynthetic process (GO:0019252);;	K00975|7.3e-308|ghi:107957958|K00975 glucose-1-phosphate adenylyltransferase [EC:2.7.7.27] | (RefSeq) glucose-1-phosphate adenylyltransferase large subunit, chloroplastic/amyloplastic-like	Starch and sucrose metabolism (ko00500);; Amino sugar and nucleotide sugar metabolism (ko00520)	Nucleotidyl transferase	Glucose-1-phosphate adenylyltransferase large subunit, chloroplastic/amyloplastic OS=Beta vulgaris OX=161934 GN=AGPS1 PE=2 SV=1	PREDICTED: glucose-1-phosphate adenylyltransferase large subunit, chloroplastic/amyloplastic-like [Gossypium hirsutum]	molecular function: binding (GO:0005488);; biological process: metabolic process (GO:0008152);; biological process: cellular process (GO:0009987);; biological process: single-organism process (GO:0044699);; molecular function: catalytic activity (GO:0003824);; cellular component: cell (GO:0005623);; cellular component: organelle (GO:0043226);; cellular component: cell part (GO:0044464)
Gh_A05G175900	410	DFR	0.904504	0.0803937	normal	0.232838	0.3771	normal	0.000106139	-1.70284	down	1.45961e-37	-4.98902	down	2.71148e-12	0.900812	normal	0.941021	0.0146526	normal	7.39207e-13	-1.16593	down	1.13338e-41	-3.68579	down		0.0100129	0.810181	normal	0.0145809	1.63375	up	0.0830854	0.42601	normal	0.016171	1.36508	up	1.75654e-05	2.14065	up	Biological Process: anthocyanin-containing compound biosynthetic process (GO:0009718);; Molecular Function: oxidoreductase activity (GO:0016491);; Molecular Function: oxidoreductase activity, acting on the CH-OH group of donors, NAD or NADP as acceptor (GO:0016616);; Biological Process: pigmentation (GO:0043473);; Molecular Function: dihydrokaempferol 4-reductase activity (GO:0045552);;	K13082|6.3e-185|ghi:107957957|K13082 bifunctional dihydroflavonol 4-reductase/flavanone 4-reductase [EC:1.1.1.219 1.1.1.234] | (RefSeq) dihydroflavonol-4-reductase-like	Flavonoid biosynthesis (ko00941)	NAD dependent epimerase/dehydratase family	Dihydroflavonol 4-reductase OS=Vitis vinifera OX=29760 GN=DFR PE=1 SV=1	dihydroflavonol 4-reductase [Gossypium hirsutum]	biological process: metabolic process (GO:0008152);; biological process: single-organism process (GO:0044699);; molecular function: catalytic activity (GO:0003824)
Gh_A05G176100	411	slr0537	0.259122	-0.470754	normal	0.0135816	-0.97895	normal	1.03803e-05	-1.67437	down	9.71542e-05	-1.86529	down	0.854992	0.0588385	normal	7.81598e-09	-1.82628	down	1.44388e-05	-1.18616	down	9.29409e-13	-2.13023	down		0.122971	0.749461	normal	7.1645e-07	1.2863	up	0.879365	-0.117049	normal	7.71643e-05	1.24122	up	0.329209	0.504268	normal	Molecular Function: kinase activity (GO:0016301);;	K11883|6.5e-37|boe:106316952|K11883 RNA-binding protein NOB1 | (RefSeq) uncharacterized protein LOC106316952	Ribosome biogenesis in eukaryotes (ko03008)	pfkB family carbohydrate kinase	--	PREDICTED: uncharacterized sugar kinase slr0537-like [Gossypium hirsutum]	molecular function: catalytic activity (GO:0003824)
Gh_A05G180200	412	GATL1	0.0496338	-0.883052	normal	0.127467	-0.532574	normal	0.227547	0.380788	normal	0.0545444	0.700444	normal	0.000137464	-1.36416	down	0.0122509	-0.705816	normal	0.235549	-0.340812	normal	1.39608e-05	-1.56825	down		0.187985	0.546042	normal	0.934098	0.0739712	normal	0.451753	0.351432	normal	0.596461	-0.169651	normal	0.000223784	-1.69836	down	Molecular Function: transferase activity, transferring glycosyl groups (GO:0016757);;	K20893|3.4e-208|ghi:107942012|K20893 probable galacturonosyltransferase-like 1 [EC:2.4.1.-] | (RefSeq) probable galacturonosyltransferase-like 1	--	Glycosyl transferase family 8	Probable galacturonosyltransferase-like 1 OS=Arabidopsis thaliana OX=3702 GN=GATL1 PE=2 SV=1	PREDICTED: probable galacturonosyltransferase-like 1 [Gossypium hirsutum]	molecular function: catalytic activity (GO:0003824)
Gh_A05G182000	413	CYP82A3	--	--	--	0.750537	-1.00134	normal	--	--	--	6.13722e-07	-9.65429	down	0.000394839	-2.21822	down	5.02964e-11	-7.89506	down	0.000111594	-6.48365	down	1.62982e-13	-9.79946	down		0.971221	-0.127038	normal	--	--	--	--	--	--	--	--	--	--	--	--	Molecular Function: iron ion binding (GO:0005506);; Cellular Component: membrane (GO:0016020);; Cellular Component: integral component of membrane (GO:0016021);; Molecular Function: oxidoreductase activity, acting on paired donors, with incorporation or reduction of molecular oxygen, NAD(P)H as one donor, and incorporation of one atom of oxygen (GO:0016709);; Molecular Function: heme binding (GO:…	K23136|6.0e-147|gra:105769156|K23136 fraxetin 5-hydroxylase [EC:1.14.14.164] | (RefSeq) uncharacterized LOC105769156	--	Cytochrome P450	Cytochrome P450 82A3 OS=Glycine max OX=3847 GN=CYP82A3 PE=2 SV=1	PREDICTED: cytochrome P450 CYP82D47-like [Gossypium hirsutum]	molecular function: binding (GO:0005488);; cellular component: membrane (GO:0016020);; cellular component: membrane part (GO:0044425);; biological process: metabolic process (GO:0008152);; biological process: single-organism process (GO:0044699);; molecular function: catalytic activity (GO:0003824);; biological process: response to stimulus (GO:0050896);; biological process: multi-organism proces…
Gh_A05G183500	414	MYB44	0.215711	-0.578809	normal	0.0876983	-0.77645	normal	0.211037	-0.479631	normal	0.000401482	-2.58615	down	3.967e-07	-1.54542	down	8.23005e-06	-1.53888	down	1.00072e-08	-1.86695	down	0.000941559	-1.12571	down		0.608446	0.427304	normal	0.202679	-0.535428	normal	0.555063	-0.355036	normal	0.00244521	-0.943061	normal	0.00281992	1.91463	up	Molecular Function: DNA binding (GO:0003677);; Cellular Component: nucleus (GO:0005634);;	K09422|1.3e-46|ghi:107900510|K09422 transcription factor MYB, plant | (RefSeq) LOW QUALITY PROTEIN: transcription factor MYB44	--	Myb-like DNA-binding domain	Transcription factor MYB73 OS=Arabidopsis thaliana OX=3702 GN=MYB73 PE=1 SV=1	PREDICTED: myb-related protein A-like [Gossypium hirsutum]	molecular function: binding (GO:0005488);; cellular component: cell (GO:0005623);; cellular component: organelle (GO:0043226);; cellular component: cell part (GO:0044464)
Gh_A05G191600	415	AGL104	7.46652e-05	1.29464	up	1.74788e-21	2.85531	up	5.81247e-40	3.87397	up	4.47304e-41	4.76799	up	2.34615e-12	1.94615	up	8.03423e-111	3.69675	up	6.73722e-121	3.6916	up	2.06309e-159	4.17732	up	0.651508	0.339665	-0.573251	normal	0.860519	0.0869135	normal	0.359142	0.248598	normal	1.70186e-06	-0.75186	normal	4.3513e-13	-1.13966	down	Molecular Function: transcription regulatory region sequence-specific DNA binding (GO:0000976);; Molecular Function: RNA polymerase II regulatory region sequence-specific DNA binding (GO:0000977);; Molecular Function: RNA polymerase II transcription factor activity, sequence-specific DNA binding (GO:0000981);; Cellular Component: nucleus (GO:0005634);; Molecular Function: transcription factor bin…	K09264|3.2e-21|pxb:103967616|K09264 MADS-box transcription factor, plant | (RefSeq) agamous-like MADS-box protein AGL11 isoform X1	--	SRF-type transcription factor (DNA-binding and dimerisation domain)	Agamous-like MADS-box protein AGL104 OS=Arabidopsis thaliana OX=3702 GN=AGL104 PE=1 SV=1	PREDICTED: agamous-like MADS-box protein AGL104 isoform X1 [Gossypium hirsutum]	molecular function: binding (GO:0005488);; biological process: biological regulation (GO:0065007);; molecular function: nucleic acid binding transcription factor activity (GO:0001071);; cellular component: cell (GO:0005623);; cellular component: organelle (GO:0043226);; cellular component: cell part (GO:0044464)
Gh_A05G195100	416	Gh_A05G195100	0.0138038	-2.26854	down	0.829836	-0.142067	normal	0.578049	0.221841	normal	0.000803629	-2.47471	down	1.19715e-08	-3.52018	down	0.0828101	-1.47836	normal	0.328607	-0.299685	normal	0.00256643	0.826115	normal	-1.25164	0.997787	-0.00331247	normal	--	--	--	0.279619	-1.35596	normal	0.104111	-0.522652	normal	4.62405e-09	3.31679	up	--	--	--	--	--	hypothetical protein ES288_A05G224700v1 [Gossypium darwinii]	--
Gh_A05G197200	417	GRF1	--	--	--	0.115596	-2.5606	normal	0.831786	0.324297	normal	2.61302e-05	-6.22522	down	1.05013e-09	-2.73032	down	0.0147153	-3.7433	down	0.484589	-0.320685	normal	6.96611e-06	-2.51313	down		0.962403	-0.25495	normal	--	--	--	--	--	--	0.000564543	-0.861209	normal	--	--	--	Molecular Function: ATP binding (GO:0005524);; Cellular Component: nucleus (GO:0005634);; Biological Process: transcription, DNA-templated (GO:0006351);; Biological Process: regulation of transcription, DNA-templated (GO:0006355);; Biological Process: developmental process (GO:0032502);;	K22382|2.0e-11|oeu:111408549|K22382 WD repeat-containing protein 26 | (RefSeq) WD repeat-containing protein 26 homolog	--	WRC	Growth-regulating factor 6 OS=Oryza sativa subsp. japonica OX=39947 GN=GRF6 PE=2 SV=2	PREDICTED: growth-regulating factor 1-like [Gossypium hirsutum]	molecular function: binding (GO:0005488);; cellular component: cell (GO:0005623);; cellular component: organelle (GO:0043226);; cellular component: cell part (GO:0044464);; biological process: metabolic process (GO:0008152);; biological process: cellular process (GO:0009987);; biological process: biological regulation (GO:0065007);; biological process: developmental process (GO:0032502)
Gh_A05G197300	418	CSLC12	0.282571	-0.369521	normal	0.717845	0.076832	normal	0.00202007	0.55124	normal	0.0160995	-0.366215	normal	1.57774e-26	-1.53375	down	1.5572e-18	-1.72845	down	1.13131e-12	-0.987473	normal	7.51291e-12	-1.28229	down		1.64101e-12	1.17895	up	0.966193	0.0212671	normal	0.009721	-0.644168	normal	0.0334008	-0.34925	normal	0.21432	0.291185	normal	Cellular Component: Golgi apparatus (GO:0005794);; Cellular Component: integral component of membrane (GO:0016021);; Molecular Function: transferase activity, transferring glycosyl groups (GO:0016757);;	K20887|3.0e-253|zju:107415449|K20887 xyloglucan glycosyltransferase 4 [EC:2.4.1.-] | (RefSeq) xyloglucan glycosyltransferase 4	--	Glycosyl transferase family group 2	Probable xyloglucan glycosyltransferase 12 OS=Arabidopsis thaliana OX=3702 GN=CSLC12 PE=1 SV=1	PREDICTED: probable xyloglucan glycosyltransferase 12 [Gossypium hirsutum]	cellular component: cell (GO:0005623);; cellular component: organelle (GO:0043226);; cellular component: cell part (GO:0044464);; cellular component: membrane (GO:0016020);; cellular component: membrane part (GO:0044425);; molecular function: catalytic activity (GO:0003824)
[truncated: 2,358 more rows]

## Sheet: 3h-6680
#ID	NO	gene_name	nr_symbol	GP2-00_vs_GP2-05_DESeq2_FDR	GP2-00_vs_GP2-05_DESeq2_log2FC	GP2-00_vs_GP2-05_DESeq2_(FDR_0.05_FC_2)_regulated	GP2-00_vs_GP2-3_DESeq2_FDR	GP2-00_vs_GP2-3_DESeq2_log2FC	GP2-00_vs_GP2-3_DESeq2_(FDR_0.05_FC_2)_regulated	GP2-00_vs_GP2-12_DESeq2_FDR	GP2-00_vs_GP2-12_DESeq2_log2FC	GP2-00_vs_GP2-12_DESeq2_(FDR_0.05_FC_2)_regulated	GP2-00_vs_GP2-24_DESeq2_FDR	GP2-00_vs_GP2-24_DESeq2_log2FC	GP2-00_vs_GP2-24_DESeq2_(FDR_0.05_FC_2)_regulated	NY2-00_vs_NY2-05_DESeq2_FDR	NY2-00_vs_NY2-05_DESeq2_log2FC	NY2-00_vs_NY2-05_DESeq2_(FDR_0.05_FC_2)_regulated	NY2-00_vs_NY2-3_DESeq2_FDR	NY2-00_vs_NY2-3_DESeq2_log2FC	NY2-00_vs_NY2-3_DESeq2_(FDR_0.05_FC_2)_regulated	NY2-00_vs_NY2-12_DESeq2_FDR	NY2-00_vs_NY2-12_DESeq2_log2FC	NY2-00_vs_NY2-12_DESeq2_(FDR_0.05_FC_2)_regulated	NY2-00_vs_NY2-24_DESeq2_FDR	NY2-00_vs_NY2-24_DESeq2_log2FC	NY2-00_vs_NY2-24_DESeq2_(FDR_0.05_FC_2)_regulated	FC	GP2-00_vs_NY2-00_DESeq2_FDR	GP2-00_vs_NY2-00_DESeq2_log2FC	GP2-00_vs_NY2-00_DESeq2_(FDR_0.05_FC_2)_regulated	GP2-05_vs_NY2-05_DESeq2_FDR	GP2-05_vs_NY2-05_DESeq2_log2FC	GP2-05_vs_NY2-05_DESeq2_(FDR_0.05_FC_2)_regulated	GP2-3_vs_NY2-3_DESeq2_FDR	GP2-3_vs_NY2-3_DESeq2_log2FC	GP2-3_vs_NY2-3_DESeq2_(FDR_0.05_FC_2)_regulated	GP2-12_vs_NY2-12_DESeq2_FDR	GP2-12_vs_NY2-12_DESeq2_log2FC	GP2-12_vs_NY2-12_DESeq2_(FDR_0.05_FC_2)_regulated	GP2-24_vs_NY2-24_DESeq2_FDR	GP2-24_vs_NY2-24_DESeq2_log2FC	GP2-24_vs_NY2-24_DESeq2_(FDR_0.05_FC_2)_regulated	GO_annotation	KEGG_annotation	KEGG_pathway_annotation	Pfam_annotation	Swiss_Prot_annotation	NR_annotation
[truncated: 6,680 more rows]
[truncated: 1 more columns]

[truncated: 2 more sheets: 12-4660, 24h-4174]
