# Supplementary material for: Comprehensive Evaluation and Transcriptome Analysis Reveal the Salt Tolerance Mechanism in Semi-Wild Cotton (Gossypium purpurascens)
Source: Int J Mol Sci. 2023 Aug 16;24(16):12853. doi: 10.3390/ijms241612853 (PMC10454576; doi:10.3390/ijms241612853)
Supplement: Supplementary file 1 [file ijms-24-12853-s001.zip › Table S4.xlsx]

## Sheet: TF
ID	GP2-00_vs_-05	NY2-00_vs_-05	GP2-00_vs_-3	NY2-00_vs_-3	GP2-00_vs_-12	NY2-00_vs_-12	GP2-00_vs_-24	NY2-00_vs_-24	ID	Family	Gene Name	Description	Species	Assembly	Chromosome	Start	End	Strand	Length (bp)
Gh_D05G245400::ERF	NaN	NaN	NaN	9.06378	10.4658	12.0748	11.9012	13.2217	Gh_D05G245400	ERF	ERF114	Ethylene-responsive transcription factor ERF114	Gossypium hirsutum	CRI	D05	22874554	22876254	+	1701
Gh_D07G150000::ERF	0.804731	NaN	1.29456	3.28027	4.49291	2.6311	5.55462	5.29504	Gh_D07G150000	ERF	CRF5	Ethylene-responsive transcription factor CRF5	Gossypium hirsutum	CRI	D07	23285665	23287108	-	1444
Gh_A12G108200::ERF	NaN	NaN	NaN	1.60781	2.43019	2.25801	3.92802	3.11015	Gh_A12G108200	ERF	RAP2-4	Ethylene-responsive transcription factor RAP2-4	Gossypium hirsutum	CRI	A12	71751123	71751575	-	453
Gh_A12G239500::ERF	NaN	3.32867	2.42857	4.54216	5.05422	4.5558	4.06186	4.03881	Gh_A12G239500	ERF	ERF1A	Ethylene-responsive transcription factor 1A	Gossypium hirsutum	CRI	A12	99731756	99732523	-	768
Gh_A12G239600::ERF	NaN	NaN	NaN	3.08142	3.59618	3.6684	2.43263	3.42409	Gh_A12G239600	ERF	ERF5	Ethylene-responsive transcription factor 5	Gossypium hirsutum	CRI	A12	99746865	99748000	+	1136
Gh_D12G200500::WRKY	-0.122196	NaN	-0.0493369	3.90017	0.322511	3.28436	1.21086	NaN	Gh_D12G200500	WRKY	WRKY21	Probable WRKY transcription factor 21	Gossypium hirsutum	CRI	D12	53284831	53300580	+	15750
Gh_A10G176800::WRKY	1.08059	0.862779	0.522987	1.76807	3.01832	2.02336	4.13065	3.14703	Gh_A10G176800	WRKY	WRKY48	Probable WRKY transcription factor 48	Gossypium hirsutum	CRI	A10	98809804	98811142	+	1339
Gh_A11G114300::WRKY	NaN	NaN	NaN	NaN	4.29265	8.12021	5.55999	9.52025	Gh_A11G114300	WRKY	WRKY23	Probable WRKY transcription factor 23	Gossypium hirsutum	CRI	A11	11075341	11076645	-	1305
Gh_A11G013100::WRKY	NaN	NaN	NaN	6.51872	7.34901	5.56387	5.61734	NaN	Gh_A11G013100	WRKY	WRKY53	Probable WRKY transcription factor 53	Gossypium hirsutum	CRI	A11	1166275	1167951	-	1677
Gh_D10G039900::WRKY	NaN	NaN	NaN	2.99738	5.07463	4.13304	6.082	4.65056	Gh_D10G039900	WRKY	WRKY28	Probable WRKY transcription factor 28	Gossypium hirsutum	CRI	D10	3436168	3437452	+	1285
Gh_A06G146700::R2R3-MYB	NaN	NaN	NaN	9.5304	6.17933	8.59424	7.19928	8.64089	Gh_A06G146700	R2R3-MYB	MYB102	Transcription factor MYB102	Gossypium hirsutum	CRI	A06	90537102	90538218	-	1117
Gh_D11G263000::R2R3-MYB	NaN	NaN	NaN	2.23608	2.17476	NaN	4.2723	2.27809	Gh_D11G263000	R2R3-MYB	MYB5	Transcription repressor MYB5	Gossypium hirsutum	CRI	D11	52808476	52809708	-	1233
Gh_D05G167500::R2R3-MYB	1.20305	1.29598	1.02332	2.43714	3.30231	1.67169	4.54835	2.16501	Gh_D05G167500	R2R3-MYB	MYB102	Transcription factor MYB102	Gossypium hirsutum	CRI	D05	14687742	14689017	+	1276
Gh_D10G022700::R2R3-MYB	1.98331	1.75798	2.35363	3.66681	4.04474	2.38496	4.20078	2.65938	Gh_D10G022700	R2R3-MYB	MYB102	Transcription factor MYB102	Gossypium hirsutum	CRI	D10	1993239	1994764	+	1526
Gh_D09G108900::R2R3-MYB	2.30207	NaN	NaN	2.08688	3.89774	2.16549	5.55906	3.43988	Gh_D09G108900	R2R3-MYB	SRM1	Transcription factor SRM1	Gossypium hirsutum	CRI	D09	36584986	36588111	+	3126
Gh_D12G156700::bHLH	1.57602	2.69621	2.35369	-0.179691	NaN	2.40349	NaN	-1.94085	Gh_D12G156700	bHLH	BHLH162	Transcription factor bHLH162	Gossypium hirsutum	CRI	D12	46111925	46112941	+	1017
Gh_D07G013400::bHLH	NaN	NaN	NaN	NaN	NaN	NaN	NaN	4.5876	Gh_D07G013400	bHLH	BHLH41	Putative transcription factor bHLH041	Gossypium hirsutum	CRI	D07	1336170	1343345	+	7176
Gh_A11G296400::bHLH	NaN	NaN	NaN	NaN	4.05782	4.55741	NaN	NaN	Gh_A11G296400	bHLH	BHLH94	Transcription factor bHLH94	Gossypium hirsutum	CRI	A11	106731938	106733477	-	1540
Gh_A07G011900::bHLH	NaN	NaN	NaN	NaN	0.350915	NaN	NaN	2.54607	Gh_A07G011900	bHLH	BHLH41	Putative transcription factor bHLH041	Gossypium hirsutum	CRI	A07	1400800	1404648	+	3849
Gh_D07G140900::bHLH	-0.145901	1.04664	-0.636177	1.29897	1.49995	0.57346	2.76635	2.00745	Gh_D07G140900	bHLH	PIF3	Transcription factor PIF3	Gossypium hirsutum	CRI	D07	21253261	21256728	+	3468
Gh_D13G165700::NAC	NaN	NaN	5.77546	9.45639	7.58095	10.0266	9.40877	10.7285	Gh_D13G165700	NAC	NAC056	NAC transcription factor 56	Gossypium hirsutum	CRI	D13	50575359	50576603	-	1245
Gh_D11G071400::NAC	NaN	8.19717	NaN	8.87026	10.6946	8.99165	10.4006	NaN	Gh_D11G071400	NAC	SOG1	SUPPRESSOR OF GAMMA RESPONSE 1	Gossypium hirsutum	CRI	D11	5885951	5887973	-	2023
Gh_A05G389400::NAC	NaN	1.19851	NaN	2.8456	8.59409	3.71707	7.35571	3.84428	Gh_A05G389400	NAC	NAC081	Protein ATAF2	Gossypium hirsutum	CRI	A05	103863756	103865362	+	1607
Gh_A04G030900::NAC	2.47732	1.91694	2.55156	4.10658	5.47651	4.38116	6.28637	5.09082	Gh_A04G030900	NAC	NAC072	NAC domain-containing protein 72	Gossypium hirsutum	CRI	A04	5033455	5035532	-	2078
Gh_A01G066800::NAC	2.49316	2.92714	1.89558	4.66293	4.24554	4.09701	5.43014	5.13644	Gh_A01G066800	NAC	NAC072	NAC domain-containing protein 72	Gossypium hirsutum	CRI	A01	8431831	8433327	+	1497
Gh_D09G076500::bZIP	NaN	NaN	NaN	6.76609	5.80121	7.77448	7.88336	9.37595	Gh_D09G076500	bZIP	BZIP1	Basic leucine zipper 1	Gossypium hirsutum	CRI	D09	30898794	30899264	+	471
Gh_A05G335400::bZIP	NaN	NaN	NaN	3.16038	NaN	0.334094	NaN	1.40999	Gh_A05G335400	bZIP	BZIP19	Basic leucine zipper 19	Gossypium hirsutum	CRI	A05	80677821	80678570	+	750
Gh_D12G126800::bZIP	1.28372	1.11512	0.812708	2.18309	0.984624	0.201684	1.69032	0.772686	Gh_D12G126800	bZIP	GBF3	G-box-binding factor 3	Gossypium hirsutum	CRI	D12	40663968	40667022	+	3055
Gh_A11G134100::bZIP	NaN	1.19017	0.854556	1.69733	4.57297	3.9452	3.93236	1.56412	Gh_A11G134100	bZIP	CPRF2	Light-inducible protein CPRF2	Gossypium hirsutum	CRI	A11	14177917	14181211	+	3295
Gh_D11G135200::bZIP	-0.0576336	0.664975	0.727756	1.19485	3.72412	3.99384	2.83575	1.09311	Gh_D11G135200	bZIP	BZIP25	Basic leucine zipper 25	Gossypium hirsutum	CRI	D11	12666841	12670124	-	3284
Gh_A11G107200::HD-ZIP	4.85052	5.28887	5.71836	8.20685	9.15723	8.44971	10.2965	10.7383	Gh_A11G107200	HD-ZIP	ATHB-7	Homeobox-leucine zipper protein ATHB-7	Gossypium hirsutum	CRI	A11	9868744	9870228	-	1485
Gh_A08G116900::HD-ZIP	NaN	NaN	NaN	NaN	7.85605	10.108	9.45034	11.7482	Gh_A08G116900	HD-ZIP	ATHB-7	Homeobox-leucine zipper protein ATHB-7	Gossypium hirsutum	CRI	A08	71012207	71013525	-	1319
Gh_A12G265000::HD-ZIP	7.25903	6.81293	6.83602	7.93247	5.16046	5.67931	NaN	5.75587	Gh_A12G265000	HD-ZIP	ATHB-7	Homeobox-leucine zipper protein ATHB-7	Gossypium hirsutum	CRI	A12	102336952	102338019	-	1068
Gh_D12G131400::HD-ZIP	4.51815	4.39304	4.14293	6.80576	4.82676	4.0724	6.89386	7.03794	Gh_D12G131400	HD-ZIP	ATHB-7	Homeobox-leucine zipper protein ATHB-7	Gossypium hirsutum	CRI	D12	41569249	41570401	-	1153
Gh_A12G131200::HD-ZIP	4.04045	3.81973	3.7203	6.08068	4.34771	3.41033	5.86282	5.72641	Gh_A12G131200	HD-ZIP	ATHB-7	Homeobox-leucine zipper protein ATHB-7	Gossypium hirsutum	CRI	A12	78742978	78743726	-	749
Gh_A13G161600::GRAS	NaN	NaN	2.28507	5.03383	5.39248	4.94063	8.21086	6.73721	Gh_A13G161600	GRAS	CIGR1	Chitin-inducible gibberellin-responsive protein 1	Gossypium hirsutum	CRI	A13	93363420	93365150	+	1731
Gh_D03G139400::GRAS	0.38597	0.20326	-0.0996586	1.37731	2.63643	0.50405	3.14463	2.19347	Gh_D03G139400	GRAS	SCL14	Scarecrow-like protein 14	Gossypium hirsutum	CRI	D03	45468830	45471915	-	3086
Gh_D03G139300::GRAS	0.42504	-0.0391128	1.00597	2.23445	3.44682	1.20077	3.09413	1.70561	Gh_D03G139300	GRAS	SCL33	Scarecrow-like protein 33	Gossypium hirsutum	CRI	D03	45455398	45458238	-	2841
Gh_A05G081200::GRAS	NaN	NaN	NaN	2.46834	2.56604	2.02926	NaN	1.99663	Gh_A05G081200	GRAS	SCL33	Scarecrow-like protein 33	Gossypium hirsutum	CRI	A05	8776181	8778145	-	1965
Gh_A04G114600::GRAS	NaN	NaN	NaN	NaN	5.26491	8.06132	6.28936	9.25611	Gh_A04G114600	GRAS	NSP2	Nodulation-signaling pathway 2 protein	Gossypium hirsutum	CRI	A04	74853043	74854662	+	1620
Gh_A12G020100::C2H2	5.34316	NaN	5.89967	7.65723	8.93999	6.48372	10.4625	9.86509	Gh_A12G020100	C2H2	ZAT10	Zinc finger protein ZAT10	Gossypium hirsutum	CRI	A12	2681452	2682152	+	701
Gh_A11G056900::C2H2	1.48228	0.90518	0.965938	2.02646	2.46937	1.7841	1.80049	1.56486	Gh_A11G056900	C2H2	Os01g0871200	Zinc finger protein STOP1 homolog	Gossypium hirsutum	CRI	A11	5010671	5011981	-	1311
Gh_D03G016000::C2H2	0.877827	0.627683	1.2626	1.28821	1.8231	1.25711	1.22542	2.32218	Gh_D03G016000	C2H2	IDD1	Protein indeterminate-domain 1	Gossypium hirsutum	CRI	D03	1172704	1175712	+	3009
Gh_A03G211900::C2H2	0.557969	1.58412	-0.222609	2.92224	2.98031	2.73185	4.93186	4.60562	Gh_A03G211900	C2H2	ZAT10	Zinc finger protein ZAT10	Gossypium hirsutum	CRI	A03	107030916	107031734	+	819
Gh_D12G019900::C2H2	4.27404	2.90577	4.11261	5.15994	5.41581	2.73585	6.85891	6.0194	Gh_D12G019900	C2H2	ZAT10	Zinc finger protein ZAT10	Gossypium hirsutum	CRI	D12	2466294	2467358	+	1065
Gh_A06G070600::HSF	NaN	NaN	NaN	3.83034	11.8688	7.72871	10.8586	4.05027	Gh_A06G070600	HSF	HSFC1	Heat stress transcription factor C-1	Gossypium hirsutum	CRI	A06	12942204	12943586	+	1383
Gh_D11G009400::HSF	1.21602	1.20614	0.66038	1.42925	1.41947	0.56971	2.44732	1.62637	Gh_D11G009400	HSF	HSFB2A	Heat stress transcription factor B-2a	Gossypium hirsutum	CRI	D11	909751	911609	-	1859
Gh_A09G226100::HSF	0.788749	0.933532	0.807132	1.5455	1.2287	1.28423	1.64168	1.45269	Gh_A09G226100	HSF	HSFA5	Heat stress transcription factor A-5	Gossypium hirsutum	CRI	A09	79343309	79345351	-	2043
Gh_A02G023200::HSF	0.59001	0.498455	0.767245	1.13975	1.2913	0.670145	2.14161	1.75591	Gh_A02G023200	HSF	HSFA5	Heat stress transcription factor A-5	Gossypium hirsutum	CRI	A02	2252177	2254400	+	2224
Gh_D08G267000::HSF	NaN	NaN	NaN	2.29325	3.21154	3.16609	3.42675	2.45831	Gh_D08G267000	HSF	HSFC1	Heat stress transcription factor C-1	Gossypium hirsutum	CRI	D08	67636927	67638136	+	1210

## Sheet: RLK
ID	GP2-00_vs_-05	NY2-00_vs_-05	GP2-00_vs_-3	NY2-00_vs_-3	GP2-00_vs_-12	NY2-00_vs_-12	GP2-00_vs_-24	NY2-00_vs_-24	ID	Family	Gene Name	Description	Species	Assembly	Chromosome	Start	End	Strand	Length (bp)
Gh_D01G031000::DLSV	NaN	NaN	NaN	10.3984	12.0129	10.2238	12.852	10.9204	Gh_D01G031000	DLSV	At1g11330	G-type lectin S-receptor-like serine/threonine-protein kinase At1g11330	Gossypium hirsutum	CRI	D01	2704313	2709776	+	5464
Gh_D01G042600::DLSV	0.609205	1.88969	1.91046	3.5985	3.64205	4.54884	0.0733007	0.55155	Gh_D01G042600	DLSV	LRR-RLK	Probable leucine-rich repeat receptor-like serine/threonine-protein kinase At3g14840	Gossypium hirsutum	CRI	D01	4487890	4497455	-	9566
Gh_A11G328100::DLSV	-3.13774	-1.91689	-1.45744	1.51135	1.63039	3.22893	-0.967068	-0.473956	Gh_A11G328100	DLSV	LRR-RLK	Probable leucine-rich repeat receptor-like serine/threonine-protein kinase At3g14840	Gossypium hirsutum	CRI	A11	112697886	112706088	+	8203
Gh_D10G017300::DLSV	NaN	NaN	NaN	4.90983	4.44466	NaN	5.83286	6.04536	Gh_D10G017300	DLSV	CRK10	Cysteine-rich receptor-like protein kinase 10	Gossypium hirsutum	CRI	D10	1380443	1388866	+	8424
Gh_D13G213600::DLSV	2.28134	1.84099	2.96662	4.31876	7.68122	5.4134	7.15697	6.29412	Gh_D13G213600	DLSV	CRK31	Putative cysteine-rich receptor-like protein kinase 31	Gossypium hirsutum	CRI	D13	58454263	58462482	+	8220
Gh_A10G191800::LRR-XI-1	NaN	3.19147	NaN	2.25929	NaN	4.23779	NaN	NaN	Gh_A10G191800	LRR-XI-1	At1g35710	Probable leucine-rich repeat receptor-like protein kinase At1g35710	Gossypium hirsutum	CRI	A10	103372766	103376170	-	3405
Gh_D08G237900::LRR-XI-1	NaN	NaN	NaN	NaN	NaN	NaN	6.0915	7.99735	Gh_D08G237900	LRR-XI-1	At5g63930	Probable leucine-rich repeat receptor-like protein kinase At5g63930	Gossypium hirsutum	CRI	D08	64965238	64968655	+	3418
Gh_A09G024200::LRR-XI-1	NaN	2.18359	NaN	NaN	NaN	2.50763	NaN	3.21316	Gh_A09G024200	LRR-XI-1	MIK2	MDIS1-interacting receptor like kinase 2	Gossypium hirsutum	CRI	A09	5893231	5896198	-	2968
Gh_D10G212700::LRR-XI-1	NaN	1.84156	2.03541	2.23316	1.58224	2.41495	NaN	2.59937	Gh_D10G212700	LRR-XI-1	MIK2	MDIS1-interacting receptor like kinase 2	Gossypium hirsutum	CRI	D10	55371525	55374830	+	3306
Gh_A07G025000::LRR-XI-1	0.0499928	0.557529	0.568418	2.05267	2.62229	1.65779	1.81567	1.50267	Gh_A07G025000	LRR-XI-1	HSL1	Receptor-like protein kinase HSL1	Gossypium hirsutum	CRI	A07	2723120	2726717	-	3598
Gh_D13G231600::CrRLK1L-1	-0.611455	0.48985	0.400647	2.25369	2.93102	1.27222	0.953788	1.13528	Gh_D13G231600	CrRLK1L-1	FER	Receptor-like protein kinase FERONIA	Gossypium hirsutum	CRI	D13	60255601	60258326	+	2726
Gh_A07G199900::CrRLK1L-1	NaN	1.10054	NaN	1.583	4.37848	1.60359	5.12297	3.145	Gh_A07G199900	CrRLK1L-1	At5g39000	Putative receptor-like protein kinase At5g39000	Gossypium hirsutum	CRI	A07	81978102	81979346	+	1245
Gh_D11G213900::CrRLK1L-1	NaN	NaN	NaN	NaN	NaN	3.85163	NaN	NaN	Gh_D11G213900	CrRLK1L-1	At5g24010	Probable receptor-like protein kinase At5g24010	Gossypium hirsutum	CRI	D11	26590171	26592705	-	2535
Gh_D11G214000::CrRLK1L-1	NaN	3.41819	NaN	NaN	NaN	3.58327	NaN	NaN	Gh_D11G214000	CrRLK1L-1	At5g24010	Probable receptor-like protein kinase At5g24010	Gossypium hirsutum	CRI	D11	26593273	26595749	-	2477
Gh_D07G198500::CrRLK1L-1	3.07462	2.21519	3.78105	3.65809	5.50081	3.31633	7.51607	4.6516	Gh_D07G198500	CrRLK1L-1	FER	Receptor-like protein kinase FERONIA	Gossypium hirsutum	CRI	D07	47650937	47652188	+	1252
Gh_D10G026800::L-LEC	2.94208	NaN	3.74008	5.90031	7.93996	7.77274	9.73763	9.65231	Gh_D10G026800	L-LEC	LECRK71	L-type lectin-domain containing receptor kinase VII.1	Gossypium hirsutum	CRI	D10	2334888	2336941	+	2054
Gh_D11G330000::L-LEC	0.896957	0.766666	1.79808	3.42376	1.38944	1.99756	1.0119	1.90323	Gh_D11G330000	L-LEC	LRR-RLK	Probable leucine-rich repeat receptor-like serine/threonine-protein kinase At3g14840	Gossypium hirsutum	CRI	D11	65917345	65922234	+	4890
Gh_D11G330900::L-LEC	NaN	NaN	NaN	NaN	NaN	5.18584	NaN	NaN	Gh_D11G330900	L-LEC	LECRK91	L-type lectin-domain containing receptor kinase IX.1	Gossypium hirsutum	CRI	D11	66048111	66049226	+	1116
Gh_A01G248700::L-LEC	NaN	NaN	NaN	NaN	NaN	3.54131	NaN	NaN	Gh_A01G248700	L-LEC	LECRKS4	L-type lectin-domain containing receptor kinase S.4	Gossypium hirsutum	CRI	A01	114989773	114991872	+	2100
Gh_D13G258600::L-LEC	NaN	2.22546	NaN	2.35048	NaN	2.22913	NaN	NaN	Gh_D13G258600	L-LEC	LECRK42	L-type lectin-domain containing receptor kinase IV.2	Gossypium hirsutum	CRI	D13	63233394	63235291	+	1898
Gh_D04G001100::LRK10L-2	1.97463	2.67204	2.40352	4.06389	3.20308	2.36306	2.05306	2.51431	Gh_D04G001100	LRK10L-2	LRK10	Rust resistance kinase Lr10	Gossypium hirsutum	CRI	D04	141657	148638	-	6982
Gh_D04G001300::LRK10L-2	NaN	2.70137	2.10347	5.29897	2.99889	2.19384	NaN	2.25563	Gh_D04G001300	LRK10L-2	LRK10	Rust resistance kinase Lr10	Gossypium hirsutum	CRI	D04	152941	155378	-	2438
Gh_D04G001800::LRK10L-2	1.73018	1.9396	1.91569	4.68469	2.63344	1.63964	NaN	1.8032	Gh_D04G001800	LRK10L-2	LRK10	Rust resistance kinase Lr10	Gossypium hirsutum	CRI	D04	215523	217945	-	2423
Gh_A11G174800::LRK10L-2	NaN	NaN	NaN	2.19818	NaN	1.62522	NaN	2.26164	Gh_A11G174800	LRK10L-2	LRK10L-2.8	LEAF RUST 10 DISEASE-RESISTANCE LOCUS RECEPTOR-LIKE PROTEIN KINASE-like 2.8	Gossypium hirsutum	CRI	A11	21833722	21837288	-	3567
Gh_D11G177200::LRK10L-2	NaN	1.50496	1.9429	2.37509	2.22617	1.46014	2.06833	1.10634	Gh_D11G177200	LRK10L-2	LRK10L-2.4	LEAF RUST 10 DISEASE-RESISTANCE LOCUS RECEPTOR-LIKE PROTEIN KINASE-like 2.4	Gossypium hirsutum	CRI	D11	18628223	18634114	+	5892
Gh_A05G328300::LRR-XII-1	NaN	NaN	NaN	9.02724	9.79227	9.07306	NaN	NaN	Gh_A05G328300	LRR-XII-1	At3g47570	Probable LRR receptor-like serine/threonine-protein kinase At3g47570	Gossypium hirsutum	CRI	A05	76484763	76487978	+	3216
Gh_D10G252400::LRR-XII-1	-0.511405	NaN	-1.58047	NaN	0.175815	6.36321	1.10187	NaN	Gh_D10G252400	LRR-XII-1	At3g47570	Probable LRR receptor-like serine/threonine-protein kinase At3g47570	Gossypium hirsutum	CRI	D10	62161171	62170786	+	9616
Gh_D05G292800::LRR-XII-1	0.594002	2.56276	NaN	2.28884	2.3143	3.67745	2.21627	2.30843	Gh_D05G292800	LRR-XII-1	FLS2	LRR receptor-like serine/threonine-protein kinase FLS2	Gossypium hirsutum	CRI	D05	30123989	30136792	+	12804
Gh_D10G253200::LRR-XII-1	NaN	NaN	NaN	NaN	NaN	3.36854	NaN	3.81713	Gh_D10G253200	LRR-XII-1	At3g47570	Probable LRR receptor-like serine/threonine-protein kinase At3g47570	Gossypium hirsutum	CRI	D10	62320396	62323592	+	3197
Gh_A10G225900::LRR-XII-1	-0.264311	1.30786	1.06369	2.90725	3.14279	2.58848	3.0439	2.10585	Gh_A10G225900	LRR-XII-1	At3g47570	Probable LRR receptor-like serine/threonine-protein kinase At3g47570	Gossypium hirsutum	CRI	A10	111070677	111078086	+	7410
Gh_A05G092000::LysM	NaN	NaN	NaN	NaN	2.88306	1.89774	NaN	2.03997	Gh_A05G092000	LysM	LYK3	LysM domain receptor-like kinase 3	Gossypium hirsutum	CRI	A05	9760991	9763788	+	2798
Gh_D11G049400::LysM	NaN	NaN	NaN	5.93882	9.71745	6.35408	8.59827	5.29984	Gh_D11G049400	LysM	LYK4	LysM domain receptor-like kinase 4	Gossypium hirsutum	CRI	D11	4053330	4055222	+	1893
Gh_A09G247100::LysM	NaN	NaN	NaN	2.55317	4.18888	3.49642	4.13886	2.31825	Gh_A09G247100	LysM	At5g43745	Putative ion channel POLLUX-like 2	Gossypium hirsutum	CRI	A09	81141081	81150159	+	9079
Gh_A11G246500::LysM	0.957291	0.896859	0.851919	1.43512	1.25929	1.11786	0.764808	1.09898	Gh_A11G246500	LysM	LYK5	Protein LYK5	Gossypium hirsutum	CRI	A11	79550318	79553264	-	2947
Gh_D09G238000::LysM	-0.256718	0.435513	0.752597	1.22797	1.83217	2.42493	1.85302	2.4906	Gh_D09G238000	LysM	NFP	Serine/threonine receptor-like kinase NFP	Gossypium hirsutum	CRI	D09	50413368	50416178	+	2811
Gh_A11G195200::RLCK-VIIa-2	-0.271118	10.0933	-0.171989	11.786	-0.686684	10.1837	-1.30358	10.3004	Gh_A11G195200	RLCK-VIIa-2	PBL19	Probable serine/threonine-protein kinase PBL19	Gossypium hirsutum	CRI	A11	26533261	26534041	-	781
Gh_D08G034400::RLCK-VIIa-2	NaN	NaN	NaN	1.95742	3.76128	2.76367	3.87339	3.38729	Gh_D08G034400	RLCK-VIIa-2	PBL19	Probable serine/threonine-protein kinase PBL19	Gossypium hirsutum	CRI	D08	3295794	3298541	-	2748
Gh_D09G117300::RLCK-VIIa-2	0.579272	1.06302	0.504769	1.47791	3.57047	1.56127	4.80089	3.18809	Gh_D09G117300	RLCK-VIIa-2	PBL2	Probable serine/threonine-protein kinase PBL2	Gossypium hirsutum	CRI	D09	37794101	37798287	-	4187
Gh_D02G215200::RLCK-VIIa-2	NaN	0.672217	NaN	1.29228	5.62582	1.16495	NaN	2.0675	Gh_D02G215200	RLCK-VIIa-2	PIX13	Probable serine/threonine-protein kinase PIX13	Gossypium hirsutum	CRI	D02	66831927	66835838	+	3912
Gh_D11G028600::RLCK-VIIa-2	NaN	NaN	NaN	1.70497	1.84175	1.14289	1.78767	2.60858	Gh_D11G028600	RLCK-VIIa-2	PBL19	Probable serine/threonine-protein kinase PBL19	Gossypium hirsutum	CRI	D11	2345190	2347005	+	1816
Gh_D10G199300::SD-2b	NaN	NaN	NaN	NaN	5.71791	8.79853	6.19501	8.34465	Gh_D10G199300	SD-2b	SD25	G-type lectin S-receptor-like serine/threonine-protein kinase SD2-5	Gossypium hirsutum	CRI	D10	52421157	52422332	+	1176
Gh_D10G199200::SD-2b	NaN	NaN	NaN	3.65792	5.74473	4.08662	5.96495	5.00438	Gh_D10G199200	SD-2b	SD25	G-type lectin S-receptor-like serine/threonine-protein kinase SD2-5	Gossypium hirsutum	CRI	D10	52373081	52374566	+	1486
Gh_D04G029500::SD-2b	NaN	0.979076	NaN	1.12422	NaN	1.94308	NaN	2.07983	Gh_D04G029500	SD-2b	LECRK3	G-type lectin S-receptor-like serine/threonine-protein kinase LECRK3	Gossypium hirsutum	CRI	D04	4032443	4033979	+	1537
Gh_D04G029600::SD-2b	NaN	NaN	NaN	NaN	NaN	1.84096	NaN	3.76919	Gh_D04G029600	SD-2b	LECRK1	G-type lectin S-receptor-like serine/threonine-protein kinase LECRK1	Gossypium hirsutum	CRI	D04	4039595	4042316	+	2722
Gh_A05G190500::SD-2b	0.793776	-0.199198	0.64764	1.68057	1.30702	1.12922	1.75405	2.07264	Gh_A05G190500	SD-2b	PK1	Putative receptor protein kinase ZmPK1	Gossypium hirsutum	CRI	A05	20495460	20498345	-	2886
Gh_D11G234200::WAK	NaN	NaN	NaN	NaN	NaN	NaN	NaN	5.0868	Gh_D11G234200	WAK	WAKL2	Wall-associated receptor kinase-like 2	Gossypium hirsutum	CRI	D11	34744308	34745938	+	1631
Gh_D10G214700::WAK	0.907408	NaN	NaN	NaN	-0.201229	NaN	0.78399	3.63567	Gh_D10G214700	WAK	WAK2	Wall-associated receptor kinase 2	Gossypium hirsutum	CRI	D10	55927829	55930961	-	3133
Gh_A05G224400::WAK	0.657119	1.48245	0.556429	0.388833	1.54251	2.8194	-1.30735	-0.517875	Gh_A05G224400	WAK	WAK2	Wall-associated receptor kinase 2	Gossypium hirsutum	CRI	A05	24663633	24666765	+	3133
Gh_D10G214600::WAK	1.14585	1.79168	NaN	1.18388	NaN	2.16591	0.939934	3.24692	Gh_D10G214600	WAK	WAK2	Wall-associated receptor kinase 2	Gossypium hirsutum	CRI	D10	55918086	55921206	-	3121
Gh_A05G224300::WAK	NaN	1.81051	NaN	1.57317	2.77019	2.01467	NaN	1.58654	Gh_A05G224300	WAK	WAK2	Wall-associated receptor kinase 2	Gossypium hirsutum	CRI	A05	24651130	24657818	+	6689

## Sheet: CAZ
ID	GP2-00_vs_-05	NY2-00_vs_-05	GP2-00_vs_-3	NY2-00_vs_-3	GP2-00_vs_-12	NY2-00_vs_-12	GP2-00_vs_-24	NY2-00_vs_-24	ID	Family	Gene Name	Description	Species	Assembly	Chromosome	Start	End	Strand	Length (bp)
Gh_D13G204000::GT8	3.91016	3.15501	4.16321	5.85657	5.12525	2.68803	8.25628	6.8498	Gh_D13G204000	GT8	GOLS2	Galactinol synthase 2	Gossypium hirsutum	CRI	D13	57316811	57318297	+	1487
Gh_D08G093700::GT20	2.35511	2.00901	3.40398	5.00259	6.23625	4.61982	7.58393	6.56951	Gh_D08G093700	GT20	TPS11	Probable alpha,alpha-trehalose-phosphate synthase [UDP-forming] 11	Gossypium hirsutum	CRI	D08	20069831	20073187	-	3357
Gh_D13G213600::GH18	2.28134	1.84099	2.96662	4.31876	7.68122	5.4134	7.15697	6.29412	Gh_D13G213600	GH18	CRK31	Putative cysteine-rich receptor-like protein kinase 31	Gossypium hirsutum	CRI	D13	58454263	58462482	+	8220
Gh_A13G201300::GT8	5.35179	NA	5.84875	7.06644	6.08719	2.66315	8.22075	6.07157	Gh_A13G201300	GT8	GOLS2	Galactinol synthase 2	Gossypium hirsutum	CRI	A13	102234642	102235849	+	1208
Gh_A10G141200::CBM18	NA	1.97373	4.53439	2.43019	8.19007	4.31806	9.97055	5.7097	Gh_A10G141200	CBM18	EP3	Endochitinase EP3	Gossypium hirsutum	CRI	A10	77930216	77931315	-	1100
Gh_D13G179300::GT1	1.02523	1.42179	1.37021	2.67061	5.94679	4.24818	7.06739	4.73771	Gh_D13G179300	GT1	UGT73C3	UDP-glycosyltransferase 73C3	Gossypium hirsutum	CRI	D13	53397689	53399175	-	1487
Gh_A13G128900::GT8	4.00563	2.95051	2.80683	4.44341	3.39997	1.65574	6.13252	4.46813	Gh_A13G128900	GT8	GOLS2	Galactinol synthase 2	Gossypium hirsutum	CRI	A13	78177364	78178470	-	1107
Gh_D06G029900::GT43	NA	NA	NA	3.58548	5.15877	3.45023	6.53605	4.33983	Gh_D06G029900	GT43	RGA3	Putative disease resistance protein RGA3	Gossypium hirsutum	CRI	D06	3184616	3188154	+	3539
Gh_D10G194400::GH3	-2.09132	-1.3439	-2.36516	0.261016	1.36927	0.975072	3.13483	4.3268	Gh_D10G194400	GH3	BXL1	Beta-D-xylosidase 1	Gossypium hirsutum	CRI	D10	51016352	51020622	-	4271
Gh_D10G199000::GH100	-0.0631455	0.35059	-0.231095	1.10343	2.74521	1.14667	5.52499	4.06225	Gh_D10G199000	GH100	INVC	Alkaline/neutral invertase C, mitochondrial	Gossypium hirsutum	CRI	D10	52232571	52235979	-	3409
Gh_D04G183700::GT1	0.230201	0.841593	0.638307	1.76413	3.0145	1.7713	5.08006	3.98955	Gh_D04G183700	GT1	TOGT1	Scopoletin glucosyltransferase	Gossypium hirsutum	CRI	D04	52665377	52667224	-	1848
Gh_A10G178500::GH100	0.77453	0.758852	0.129863	1.55052	3.66383	1.66707	5.86308	3.63581	Gh_A10G178500	GH100	INVC	Alkaline/neutral invertase C, mitochondrial	Gossypium hirsutum	CRI	A10	99183866	99186726	-	2861
Gh_D01G042700::CBM57	-1.37308	NA	-0.0421403	2.90856	3.98175	4.76044	2.97926	3.05215	Gh_D01G042700	CBM57	At1g53430	Probable LRR receptor-like serine/threonine-protein kinase At1g53430	Gossypium hirsutum	CRI	D01	4514239	4522040	+	7802
Gh_D05G134300::GH35	-2.5904	-1.31367	-4.40554	-1.09517	0.111964	1.91233	0.748977	2.99074	Gh_D05G134300	GH35	BGAL1	Beta-galactosidase 1	Gossypium hirsutum	CRI	D05	11565334	11571788	+	6455
Gh_D13G042200::GT10	0.378376	NA	0.907291	3.28849	2.5987	2.54707	2.69813	2.91601	Gh_D13G042200	GT10	FUT12	Putative fucosyltransferase-like protein	Gossypium hirsutum	CRI	D13	4448794	4452765	-	3972
Gh_D09G070100::GH14	2.02055	1.87709	1.26488	2.62745	3.13625	0.000211372	4.66885	2.59328	Gh_D09G070100	GH14	BAM1	Beta-amylase 1, chloroplastic	Gossypium hirsutum	CRI	D09	29529459	29532377	+	2919
Gh_Contig00687G000300::GH14	1.97458	1.75526	1.27227	2.69912	1.39653	-0.350179	3.9877	2.54705	Gh_Contig00687G000300	GH14	BAM1	Beta-amylase 1, chloroplastic	Gossypium hirsutum	CRI	Contig00687	46806	49769	+	2964
Gh_D05G100500::CBM48	0.360535	0.716229	0.810296	1.82865	0.974233	0.971445	2.39678	2.48386	Gh_D05G100500	CBM48	KINB1	SNF1-related protein kinase regulatory subunit beta-1	Gossypium hirsutum	CRI	D05	8450437	8453621	+	3185
Gh_A02G114600::GH37	0.550556	0.485174	0.883846	1.96702	2.64588	1.59501	3.77716	2.43296	Gh_A02G114600	GH37	TRE1	Trehalase	Gossypium hirsutum	CRI	A02	42689158	42691934	+	2777
Gh_D10G176400::GH14	1.54487	1.14027	0.958542	2.13743	1.65695	0.0302686	4.17345	2.29804	Gh_D10G176400	GH14	BAM1	Beta-amylase 1, chloroplastic	Gossypium hirsutum	CRI	D10	45585822	45588886	+	3065
Gh_A12G209500::GH36	-0.98008	-0.562887	-1.64418	0.785455	0.0347026	-0.139032	0.990776	2.29762	Gh_A12G209500	GH36	RFS2	Probable galactinol--sucrose galactosyltransferase 2	Gossypium hirsutum	CRI	A12	95954653	95956298	+	1646
Gh_A09G233100::CBM18	NA	0.100413	NA	0.605288	4.6183	1.10211	NA	2.26489	Gh_A09G233100	CBM18	EP3	Endochitinase EP3	Gossypium hirsutum	CRI	A09	79876946	79878125	-	1180
Gh_D04G074900::GT1	NA	NA	2.52701	2.77735	1.96092	1.76367	NA	2.13992	Gh_D04G074900	GT1	UGT709C2	7-deoxyloganetic acid glucosyltransferase	Gossypium hirsutum	CRI	D04	12066129	12068436	-	2308
Gh_D11G379500::GT1	NA	NA	1.4482	2.23667	NA	0.967509	NA	2.02044	Gh_D11G379500	GT1	UGT73C3	UDP-glycosyltransferase 73C3	Gossypium hirsutum	CRI	D11	71995555	71997027	-	1473
Gh_A05G362500::GH36	4.17692	2.28057	3.23816	4.30238	3.64754	0.477407	5.99121	1.91351	Gh_A05G362500	GH36	RFS5	Probable galactinol--sucrose galactosyltransferase 5	Gossypium hirsutum	CRI	A05	97517724	97521143	-	3420
Gh_A03G214400::GT1	0.409074	0.432337	0.143765	0.0445952	-0.637881	0.924159	0.554971	1.80389	Gh_A03G214400	GT1	UGT84A13	Gallate 1-beta-glucosyltransferase	Gossypium hirsutum	CRI	A03	107294031	107306031	-	12001
Gh_A01G046300::CBM57	-2.37393	-1.44255	-1.66872	1.17612	3.00653	3.06484	0.799308	1.66996	Gh_A01G046300	CBM57	At1g53430	Probable LRR receptor-like serine/threonine-protein kinase At1g53430	Gossypium hirsutum	CRI	A01	5079741	5087819	+	8079
Gh_A10G026700::GT20	0.670054	0.202706	0.191364	1.36817	2.21654	1.06283	3.25829	1.50392	Gh_A10G026700	GT20	TPS7	Probable alpha,alpha-trehalose-phosphate synthase [UDP-forming] 7	Gossypium hirsutum	CRI	A10	2386355	2390402	-	4048
Gh_A13G138000::GH100	-0.18642	-0.241022	-0.138896	1.02996	1.00507	0.200106	2.50752	1.4962	Gh_A13G138000	GH100	CINV2	Alkaline/neutral invertase CINV2	Gossypium hirsutum	CRI	A13	84407291	84412123	-	4833
Gh_D13G188300::GT2	1.01115	0.778399	0.491662	1.59135	-1.15411	-0.580401	0.0790416	1.47549	Gh_D13G188300	GT2	CSLE6	Cellulose synthase-like protein E6	Gossypium hirsutum	CRI	D13	55347465	55352308	-	4844
Gh_D08G008400::GT29	3.57759	1.6747	2.49733	2.17968	2.04019	1.96392	NA	1.35051	Gh_D08G008400	GT29	GALT29A	Beta-1,6-galactosyltransferase GALT29A	Gossypium hirsutum	CRI	D08	709391	710560	+	1170
Gh_D09G037300::GTnc	0.645141	1.30521	-0.0844644	1.39615	-0.193298	0.30655	0.384427	1.25013	Gh_D09G037300	GTnc	RCOM_0530710	Glycosyltransferase family 92 protein RCOM_0530710	Gossypium hirsutum	CRI	D09	10651561	10653788	+	2228
Gh_A08G125600::GT5	2.95219	2.57165	3.11195	2.88969	0.0918188	1.06471	-1.06943	1.18963	Gh_A08G125600	GT5	WAXY	Granule-bound starch synthase 1, chloroplastic/amyloplastic	Gossypium hirsutum	CRI	A08	83305639	83309342	-	3704
Gh_A08G008800::GT29	NA	1.68976	NA	1.54777	NA	1.79775	NA	1.1311	Gh_A08G008800	GT29	GALT29A	Beta-1,6-galactosyltransferase GALT29A	Gossypium hirsutum	CRI	A08	764207	765376	+	1170
Gh_D09G133400::GH28	-0.689578	-0.662968	-1.14569	1.52239	2.21686	-0.273604	1.58039	1.00221	Gh_D09G133400	GH28	NA	Polygalacturonase	Gossypium hirsutum	CRI	D09	40023171	40026018	-	2848
Gh_A01G046200::CBM57	-1.59336	0.214707	-0.0725158	1.54751	3.63532	3.78821	-0.179467	0.86055	Gh_A01G046200	CBM57	LRR-RLK	Probable leucine-rich repeat receptor-like serine/threonine-protein kinase At3g14840	Gossypium hirsutum	CRI	A01	5047752	5057971	-	10220
Gh_A10G031400::GT5	-2.52983	-2.17068	-11.1137	-5.85558	1.79993	3.97502	-0.584897	0.598094	Gh_A10G031400	GT5	SS4	Probable starch synthase 4, chloroplastic/amyloplastic	Gossypium hirsutum	CRI	A10	2776868	2783551	-	6684
Gh_D11G309900::CBM43	NA	NA	NA	1.24673	1.5464	1.66527	NA	0.576969	Gh_D11G309900	CBM43	At1g11820	Glucan endo-1,3-beta-glucosidase 1	Gossypium hirsutum	CRI	D11	62819939	62821816	+	1878
Gh_D01G042600::CBM57	0.609205	1.88969	1.91046	3.5985	3.64205	4.54884	0.0733007	0.55155	Gh_D01G042600	CBM57	LRR-RLK	Probable leucine-rich repeat receptor-like serine/threonine-protein kinase At3g14840	Gossypium hirsutum	CRI	D01	4487890	4497455	-	9566
Gh_A12G070700::GT1	0.636203	2.00809	0.321315	0.991524	0.059339	0.519634	0.57219	0.502749	Gh_A12G070700	GT1	UGT72E1	UDP-glycosyltransferase 72E1	Gossypium hirsutum	CRI	A12	16048625	16050058	-	1434
Gh_D13G089100::GT35	-0.491534	-0.301935	0.534774	0.5848	2.83912	3.89092	-0.180602	0.420027	Gh_D13G089100	GT35	STP-1	Alpha-1,4 glucan phosphorylase L-2 isozyme, chloroplastic/amyloplastic	Gossypium hirsutum	CRI	D13	15655597	15661905	+	6309
Gh_D03G112200::GT1	0.108921	0.492333	0.215546	1.30803	0.113898	0.304322	0.0976359	0.38222	Gh_D03G112200	GT1	UGT89B2	UDP-glycosyltransferase 89B2	Gossypium hirsutum	CRI	D03	38619196	38620602	-	1407
Gh_A13G040000::GT10	0.0892172	0.405314	0.297213	2.1498	2.18888	0.0650967	3.297	0.245277	Gh_A13G040000	GT10	FUT11	Glycoprotein 3-alpha-L-fucosyltransferase A	Gossypium hirsutum	CRI	A13	4869385	4873358	-	3974
Gh_D01G089100::GT2	-0.338578	-0.230745	-0.145555	1.01918	-0.578296	-0.329035	-0.593182	0.0905387	Gh_D01G089100	GT2	CSLE6	Cellulose synthase-like protein E6	Gossypium hirsutum	CRI	D01	11551597	11557327	-	5731
Gh_D03G063200::CBM50	-1.63417	-0.403855	-0.231458	0.810728	0.0186076	1.29031	-1.91664	-0.0155839	Gh_D03G063200	CBM50	LYK3	LysM domain receptor-like kinase 3	Gossypium hirsutum	CRI	D03	11285229	11295523	+	10295
Gh_D01G042400::CBM57	1.22874	1.38094	-0.254148	-0.274306	0.195741	1.64525	-0.581582	-0.133527	Gh_D01G042400	CBM57	LRR-RLK	Probable leucine-rich repeat receptor-like serine/threonine-protein kinase At3g14840	Gossypium hirsutum	CRI	D01	4448666	4461364	-	12699
Gh_D06G001000::GH17	-0.693887	-0.0316829	-0.537144	0.660508	1.01752	2.04406	-1.32479	-0.346665	Gh_D06G001000	GH17	GNS1	Glucan endo-1,3-beta-glucosidase, basic isoform	Gossypium hirsutum	CRI	D06	60976	62966	-	1991
Gh_D12G231600::GH14	-1.28772	-1.13736	-1.93413	-1.18236	0.361039	1.53092	0.787043	-0.399219	Gh_D12G231600	GH14	BAM3	Beta-amylase 3, chloroplastic	Gossypium hirsutum	CRI	D12	56670503	56672889	+	2387
Gh_A04G143000::GH3	NA	1.37157	1.37846	0.252794	0.790631	0.997548	NA	-0.439873	Gh_A04G143000	GH3	BXL5	Probable beta-D-xylosidase 5	Gossypium hirsutum	CRI	A04	81760046	81763506	-	3461
Gh_A11G328100::CBM57	-3.13774	-1.91689	-1.45744	1.51135	1.63039	3.22893	-0.967068	-0.473956	Gh_A11G328100	CBM57	LRR-RLK	Probable leucine-rich repeat receptor-like serine/threonine-protein kinase At3g14840	Gossypium hirsutum	CRI	A11	112697886	112706088	+	8203

## Sheet: Others
ID	GP2-00_vs_-05	NY2-00_vs_-05	GP2-00_vs_-3	NY2-00_vs_-3	GP2-00_vs_-12	NY2-00_vs_-12	GP2-00_vs_-24	NY2-00_vs_-24	ID	Family	Gene Name	Description	Species	Assembly	Chromosome	Start	End	Strand	Length (bp)
Gh_A09G185600::ACX	0.391179	0.353524	0.280566	1.00787	0.870663	0.926892	1.18249	1.44319	Gh_A09G185600	ACX	ACX4	Acyl-coenzyme A oxidase 4, peroxisomal	Gossypium hirsutum	CRI	A09	75262664	75266145	+	3482
Gh_D01G018900::ACX	0.204988	0.599441	0.893289	1.65537	2.47089	1.55466	3.92579	3.81581	Gh_D01G018900	ACX	ACX3	Acyl-coenzyme A oxidase 3, peroxisomal	Gossypium hirsutum	CRI	D01	1555668	1560443	-	4776
Gh_D10G107500::ACX	1.25761	1.34752	2.00348	3.33212	1.2082	1.60333	2.40777	2.31499	Gh_D10G107500	ACX	Acx	Acyl-coenzyme A oxidase, peroxisomal	Gossypium hirsutum	CRI	D10	14854182	14857170	-	2989
Gh_D11G027000::ACX	0.434402	-0.1008	0.973796	1.07541	1.79496	0.725813	3.59196	1.64151	Gh_D11G027000	ACX	ACX1	Peroxisomal acyl-coenzyme A oxidase 1	Gossypium hirsutum	CRI	D11	2222176	2227694	-	5519
Gh_D11G238100::ACX	0.670943	0.63039	0.821172	1.4874	2.69049	1.06171	5.22598	3.28238	Gh_D11G238100	ACX	ACX2	Acyl-coenzyme A oxidase 2, peroxisomal	Gossypium hirsutum	CRI	D11	36731623	36735949	+	4327
Gh_A03G188600::B-BOX	-0.266439	-0.0777194	-0.331902	1.01445	-1.4611	-3.10942	0.476288	1.04627	Gh_A03G188600	B-BOX	MIP1B	B-box domain protein 31	Gossypium hirsutum	CRI	A03	103347770	103349061	-	1292
Gh_D13G070000::B-BOX	-0.332308	0.445844	0.0320855	2.36659	-2.40938	-4.16143	0.397412	1.93132	Gh_D13G070000	B-BOX	MIP1B	B-box domain protein 31	Gossypium hirsutum	CRI	D13	9293877	9295291	+	1415
Gh_A11G259200::Cellulose	NA	NA	NA	NA	6.70789	NA	7.43783	9.43331	Gh_A11G259200	Cellulose	CSLE6	Cellulose synthase-like protein E6	Gossypium hirsutum	CRI	A11	91527061	91536244	-	9184
Gh_D02G048300::Cellulose	2.05086	2.1564	2.65115	5.97545	7.04725	4.99283	6.60827	6.04974	Gh_D02G048300	Cellulose	CSLG2	Cellulose synthase-like protein G2	Gossypium hirsutum	CRI	D02	5190467	5196990	-	6524
Gh_D02G048800::Cellulose	NA	NA	NA	NA	10.4498	11.5874	13.9574	15.367	Gh_D02G048800	Cellulose	CSLG2	Cellulose synthase-like protein G2	Gossypium hirsutum	CRI	D02	5335312	5341384	+	6073
Gh_D11G263600::Cellulose	-0.817425	-0.606964	0.322554	1.32614	3.68004	1.3992	3.75039	1.89228	Gh_D11G263600	Cellulose	CSLE6	Cellulose synthase-like protein E6	Gossypium hirsutum	CRI	D11	53046463	53051119	-	4657
Gh_D13G188300::Cellulose	1.01115	0.778399	0.491662	1.59135	-1.15411	-0.580401	0.0790416	1.47549	Gh_D13G188300	Cellulose	CSLE6	Cellulose synthase-like protein E6	Gossypium hirsutum	CRI	D13	55347465	55352308	-	4844
Gh_A08G118400::CLE-TDIF	NA	NA	NA	NA	NA	NA	NA	5.4475	Gh_A08G118400	CLE-TDIF	CLE14	CLAVATA3/ESR (CLE)-related protein 14	Gossypium hirsutum	CRI	A08	73956287	73956538	-	252
Gh_D08G201100::CLE-TDIF	NA	NA	NA	NA	NA	2.71813	NA	NA	Gh_D08G201100	CLE-TDIF	CLE14	CLAVATA3/ESR (CLE)-related protein 14	Gossypium hirsutum	CRI	D08	59971697	59971954	-	258
Gh_D08G215300::CLE-TDIF	NA	NA	NA	NA	NA	1.22376	NA	0.390227	Gh_D08G215300	CLE-TDIF	TDIF	CLAVATA3/ESR (CLE)-related protein TDIF	Gossypium hirsutum	CRI	D08	61997197	61998140	+	944
Gh_A05G080800::Cyclin	2.74375	1.74304	1.15072	2.81553	NA	NA	2.03567	1.72096	Gh_A05G080800	Cyclin	SMR4	Cyclin-dependent protein kinase inhibitor SMR4	Gossypium hirsutum	CRI	A05	8758760	8758999	-	240
Gh_A06G146200::Cyclin	NA	-0.519174	NA	-1.3968	0.0135476	1.29506	-5.66864	-0.201244	Gh_A06G146200	Cyclin	CYCD6-1	Putative cyclin-D6-1	Gossypium hirsutum	CRI	A06	88667684	88669071	-	1388
Gh_A07G071000::Cyclin	NA	NA	NA	6.03128	NA	NA	NA	NA	Gh_A07G071000	Cyclin	CYCH1-1	Cyclin-H1-1	Gossypium hirsutum	CRI	A07	9070117	9072151	-	2035
Gh_A07G101400::Cyclin	NA	NA	NA	NA	NA	1.71176	NA	2.62735	Gh_A07G101400	Cyclin	CYCC1-2	Cyclin-C1-2	Gossypium hirsutum	CRI	A07	15423444	15427459	-	4016
Gh_D03G030900::Cyclin	-0.509244	NA	-0.374738	NA	-0.713085	1.14464	-3.66638	0.830129	Gh_D03G030900	Cyclin	CYCD1-1	Cyclin-D1-1	Gossypium hirsutum	CRI	D03	2946053	2948419	+	2367
Gh_D04G183400::Cyclin	NA	NA	5.21462	5.50868	6.5292	7.57376	NA	NA	Gh_D04G183400	Cyclin	CYCD3-1	Cyclin-D3-1	Gossypium hirsutum	CRI	D04	52649864	52651972	-	2109
Gh_D05G092200::Cyclin	2.85757	NA	0.998752	2.51767	NA	NA	0.559653	NA	Gh_D05G092200	Cyclin	SMR4	Cyclin-dependent protein kinase inhibitor SMR4	Gossypium hirsutum	CRI	D05	7707626	7707868	-	243
Gh_D12G113000::Cyclin	-1.77501	-1.18552	0.978321	0.943533	-0.0407178	2.60832	-1.42799	0.377523	Gh_D12G113000	Cyclin	CYCU4-1	Cyclin-U4-1	Gossypium hirsutum	CRI	D12	38325757	38327088	+	1332
Gh_A05G167200::EXP	-1.08851	-0.399125	0.252089	-0.855242	0.874256	2.19043	1.12039	0.0611854	Gh_A05G167200	EXP	EXPA1	Expansin-A1	Gossypium hirsutum	CRI	A05	17816692	17817628	+	937
Gh_A06G001700::EXP	NA	NA	NA	NA	NA	8.44185	NA	NA	Gh_A06G001700	EXP	EXPA1	Expansin-A1	Gossypium hirsutum	CRI	A06	87060	88028	+	969
Gh_A10G183700::EXP	NA	NA	NA	NA	NA	2.77335	NA	2.57748	Gh_A10G183700	EXP	EXPA8	Expansin-A8	Gossypium hirsutum	CRI	A10	100572599	100573981	-	1383
Gh_D05G184200::EXP	NA	NA	NA	NA	NA	3.02527	NA	NA	Gh_D05G184200	EXP	EXPA1	Expansin-A1	Gossypium hirsutum	CRI	D05	16137956	16138888	+	933
Gh_D10G258600::EXP	-0.750131	NA	-0.0683156	NA	-0.691117	2.45392	-3.99014	NA	Gh_D10G258600	EXP	EXPA4	Expansin-A4	Gossypium hirsutum	CRI	D10	62915608	62917401	-	1794
Gh_A03G043900::LOG	0.830372	0.336509	0.326123	0.301754	0.141996	1.49555	0.191301	1.96772	Gh_A03G043900	LOG	LOG3	Cytokinin riboside 5'-monophosphate phosphoribohydrolase LOG3	Gossypium hirsutum	CRI	A03	6107490	6111282	+	3793
Gh_A05G164400::LOG	-0.432031	0.219318	1.09229	3.81924	1.27514	2.03225	0.354492	3.09768	Gh_A05G164400	LOG	LOG5	Cytokinin riboside 5'-monophosphate phosphoribohydrolase LOG5	Gossypium hirsutum	CRI	A05	17421789	17423580	-	1792
Gh_D01G108100::LOG	0.954489	NA	1.3656	1.84396	2.82619	1.61012	3.89296	3.94671	Gh_D01G108100	LOG	LOG5	Cytokinin riboside 5'-monophosphate phosphoribohydrolase LOG5	Gossypium hirsutum	CRI	D01	15790130	15791323	-	1194
Gh_D03G153300::LOG	0.627926	-0.110898	-0.488875	-0.956018	0.654141	0.542873	1.64521	2.4486	Gh_D03G153300	LOG	LOG3	Cytokinin riboside 5'-monophosphate phosphoribohydrolase LOG3	Gossypium hirsutum	CRI	D03	48049674	48053567	-	3894
Gh_D05G181500::LOG	1.15999	0.734976	1.29358	3.34079	-0.0362032	-0.0861444	-1.32002	1.67679	Gh_D05G181500	LOG	LOG5	Cytokinin riboside 5'-monophosphate phosphoribohydrolase LOG5	Gossypium hirsutum	CRI	D05	15840484	15842046	-	1563
Gh_A05G196400::PSK	2.365	NA	NA	1.39182	NA	NA	NA	NA	Gh_A05G196400	PSK	PSK3	Phytosulfokines 3	Gossypium hirsutum	CRI	A05	20956598	20957182	-	585
Gh_A06G026300::PSK	NA	NA	NA	NA	1.76662	1.15478	NA	1.71462	Gh_A06G026300	PSK	PSK3	Phytosulfokines 3	Gossypium hirsutum	CRI	A06	2652162	2652490	-	329
Gh_A12G091500::PSK	NA	NA	NA	NA	NA	5.63587	6.51662	NA	Gh_A12G091500	PSK	PSK3	Phytosulfokines 3	Gossypium hirsutum	CRI	A12	42339583	42339921	-	339
Gh_D02G030200::PSK	NA	1.18574	NA	0.355884	NA	-0.498406	NA	1.13229	Gh_D02G030200	PSK	PSKR	Phytosulfokine receptor 1	Gossypium hirsutum	CRI	D02	3121338	3122042	-	705
Gh_D03G153400::CNGC	-0.091335	-0.208037	-0.0483424	1.08932	1.06188	0.247712	1.96911	1.10519	Gh_D03G153400	CNGC	CNGC15C	Protein CNGC15c	Gossypium hirsutum	CRI	D03	48098046	48101188	-	3143
Gh_A12G200600::EXP	-0.21965	0.275993	0.464308	-0.315349	-0.892642	0.0672573	-0.860372	1.2529	Gh_A12G200600	EXP	EXPA1	Expansin-A1	Gossypium hirsutum	CRI	A12	94564404	94565678	-	1275
Gh_A13G008000::IDA	NA	0.982761	NA	1.82483	6.7342	2.27854	5.5187	2.37867	Gh_A13G008000	IDA	IDA	Protein IDA	Gossypium hirsutum	CRI	A13	795139	796089	-	951
Gh_D13G007900::IDA	NA	0.777037	NA	1.11003	5.45673	1.32994	4.62142	1.76436	Gh_D13G007900	IDA	IDA	Protein IDA	Gossypium hirsutum	CRI	D13	681060	681661	-	602
Gh_A08G165800::PAO	NA	NA	NA	2.48974	5.98124	2.72845	6.8418	2.52975	Gh_A08G165800	PAO	PAO1	Polyamine oxidase 1	Gossypium hirsutum	CRI	A08	105987895	106007484	-	19590
Gh_D08G164300::PAO	NA	NA	1.12899	2.18945	4.68834	3.20491	5.74604	2.22766	Gh_D08G164300	PAO	PAO1	Polyamine oxidase 1	Gossypium hirsutum	CRI	D08	52770412	52776532	-	6121
Gh_D13G229000::AKT	1.28799	0.773052	1.77003	2.88161	1.55223	1.55635	2.67726	2.47131	Gh_D13G229000	AKT	AKT1	Potassium channel AKT1	Gossypium hirsutum	CRI	D13	59945025	59950009	-	4985
Gh_A08G063400::CHX	-0.629488	0.993446	0.533203	1.40726	1.49237	1.66345	0.752598	1.85956	Gh_A08G063400	CHX	CHX28	Cation/H(+) antiporter 28	Gossypium hirsutum	CRI	A08	8052851	8055497	-	2647
Gh_D12G011300::CLC	NA	9.94157	NA	9.92965	NA	9.25109	NA	11.1567	Gh_D12G011300	CLC	CLC-E	Chloride channel protein CLC-e	Gossypium hirsutum	CRI	D12	1404439	1407768	+	3330
Gh_D12G008000::NHX	0.934678	1.69258	1.30938	2.05933	2.09143	0.448609	2.3263	1.24503	Gh_D12G008000	NHX	NHX2	Sodium/hydrogen exchanger 2	Gossypium hirsutum	CRI	D12	1006979	1013140	-	6162
Gh_D05G108800::SKOR	0.245415	0.989312	-1.9826	-0.645208	0.0512512	-0.0964592	1.69506	1.51984	Gh_D05G108800	SKOR	SKOR	Potassium channel SKOR	Gossypium hirsutum	CRI	D05	9191473	9203468	-	11996
Gh_A03G220100::Sodium	-0.706906	-0.158005	-0.22854	0.584432	0.89414	1.2215	0.814647	1.59533	Gh_A03G220100	Sodium	scnm1	Sodium channel modifier 1	Gossypium hirsutum	CRI	A03	107950996	107953478	+	2483
Gh_D12G256500::Sodium	NA	NA	NA	NA	NA	0.552755	NA	1.05421	Gh_D12G256500	Sodium	Nalcn	Sodium leak channel non-selective protein	Gossypium hirsutum	CRI	D12	59086332	59087777	-	1446
