# Supplementary material for: Comprehensive Evaluation and Transcriptome Analysis Reveal the Salt Tolerance Mechanism in Semi-Wild Cotton (Gossypium purpurascens)
Source: Int J Mol Sci. 2023 Aug 16;24(16):12853. doi: 10.3390/ijms241612853 (PMC10454576; doi:10.3390/ijms241612853)
Supplement: Supplementary file 1 [file ijms-24-12853-s001.zip › Table S5.xlsx]

## Sheet: A
Source	Target	Type	Weight			Gene ID	Gene Name	Description
MYB4	Gh_A05G175900	undirected	0.101514			Gh_A02G031300	CHS1	Chalcone synthase 1
MYB4	Gh_A05G312100	undirected	0.113025			Gh_A02G098300	CYTB5-E	Cytochrome b5 isoform E
MYB4	Gh_A06G008100	undirected	0.12799			Gh_A02G170000	4CL	4-coumarate--CoA ligase 2
MYB4	Gh_A10G116000	undirected	0.104714			Gh_A03G170000	WAK2	Wall-associated receptor kinase 2
MYB4	Gh_A12G192500	undirected	0.174418			Gh_A04G074100	LWD1	WD repeat-containing protein LWD1
MYB4	Gh_Contig00311G000200	undirected	0.170822			Gh_A04G117100	GSTU18	Glutathione S-transferase U18
MYB4	Gh_D02G036800	undirected	0.16022			Gh_A05G175900	DFR	Dihydroflavonol 4-reductase
MYB4	Gh_D05G193100	undirected	0.11487			Gh_A05G312100	CHS2	Chalcone synthase 2
MYB4	Gh_D05G322000	undirected	0.100398			Gh_A06G008100	DFR	Bifunctional dihydroflavonol 4-reductase/flavanone 4-reductase
MYB4	Gh_D12G188200	undirected	0.111195			Gh_A07G078600	SNL6	Cinnamoyl-CoA reductase-like SNL6
MYB4	Gh_A02G170000	undirected	0.161627			Gh_A07G130000	CYP75A3	Flavonoid 3',5'-hydroxylase 2
MYB4	Gh_D06G006600	undirected	0.126068			Gh_A07G130200	CYP75A3	Flavonoid 3',5'-hydroxylase 2
bHLH162	Gh_D08G120000	undirected	0.126388			Gh_A08G104300	SNL6	Cinnamoyl-CoA reductase-like SNL6
TT2	Gh_A12G192500	undirected	0.106099			Gh_A10G116000	CHS1	Chalcone synthase 1
TT2	Gh_D06G006600	undirected	0.102392			Gh_A12G064100	F3H	Naringenin,2-oxoglutarate 3-dioxygenase
NAC062	Gh_D12G061800	undirected	0.139249			Gh_A12G192500	LAR	Leucoanthocyanidin reductase
NAC062	Gh_A12G064100	undirected	0.13164			Gh_A12G229400	CYP76B6	Geraniol 8-hydroxylase
NAC062	Gh_A12G229400	undirected	0.105069			Gh_A13G061700	GS1-1	Glutamine synthetase cytosolic isozyme 1
NAC062	Gh_D04G157000	undirected	0.112811			Gh_Contig00311G000200	CHS1	Chalcone synthase 1
Gh_D05G010500	WRAK50	undirected	0.100823			Gh_Contig00311G000400	CHS1	Chalcone synthase 1
Gh_A05G175900	NAC062	undirected	0.117325			Gh_Contig01002G001700	CHI	Chalcone--flavonone isomerase
Gh_A10G116000	NAC062	undirected	0.129227			Gh_D01G056900	ispDF	Bifunctional enzyme IspD/IspF
Gh_A02G098300	NAC062	undirected	0.120137			Gh_D01G213500	ACC1	Acetyl-CoA carboxylase 1
Gh_A02G031300	Gh_A05G175900	undirected	0.165461			Gh_D02G036800	CHS1	Chalcone synthase 1
Gh_A02G031300	Gh_A05G312100	undirected	0.114259			Gh_D04G129200	PAL	Phenylalanine ammonia-lyase
Gh_A02G031300	Gh_A07G130200	undirected	0.146424			Gh_D04G157000	GSTU18	Glutathione S-transferase U18
Gh_A02G031300	Gh_A10G116000	undirected	0.179431			Gh_D05G010500	GSO2	LRR receptor-like serine/threonine-protein kinase GSO2
Gh_A02G031300	Gh_A12G192500	undirected	0.164028			Gh_D05G127500	NA	NA
Gh_A02G031300	Gh_Contig00311G000200	undirected	0.146313			Gh_D05G193100	DFR	Dihydroflavonol 4-reductase
Gh_A02G031300	Gh_Contig00311G000400	undirected	0.270258			Gh_D05G322000	CHS2	Chalcone synthase 2
Gh_A02G031300	Gh_Contig01002G001700	undirected	0.170739			Gh_D06G006600	DFR	Bifunctional dihydroflavonol 4-reductase/flavanone 4-reductase
Gh_A02G031300	Gh_D02G036800	undirected	0.163379			Gh_D06G107200	TOM2AH3	Tetraspanin-19
Gh_A02G031300	Gh_D05G193100	undirected	0.126933			Gh_D07G078700	SNL6	Cinnamoyl-CoA reductase-like SNL6
Gh_A02G031300	Gh_D07G128700	undirected	0.125751			Gh_D07G128700	CYP75A3	Flavonoid 3',5'-hydroxylase 2
Gh_A02G031300	Gh_D12G061800	undirected	0.125762			Gh_D08G120000	DLO2	Protein DMR6-LIKE OXYGENASE 2
Gh_A02G031300	Gh_D12G188200	undirected	0.238567			Gh_D08G197600	ANT17	Leucoanthocyanidin dioxygenase
Gh_A02G031300	Gh_D13G022800	undirected	0.12344			Gh_D09G081000	CRK25	Cysteine-rich receptor-like protein kinase 25
Gh_A05G175900	Gh_A05G312100	undirected	0.223581			Gh_D10G245400	BAD1	Ankyrin repeat-containing protein BDA1
Gh_A05G175900	Gh_A06G008100	undirected	0.12879			Gh_D12G061800	AN3	Naringenin,2-oxoglutarate 3-dioxygenase (Fragment)
Gh_A05G175900	Gh_A07G130000	undirected	0.153475			Gh_D12G188200	LAR	Leucoanthocyanidin reductase
Gh_A05G175900	Gh_A07G130200	undirected	0.132515			Gh_D12G223900	CYP76B6	Geraniol 8-hydroxylase
Gh_A05G175900	Gh_A10G116000	undirected	0.379386			Gh_D12G274000	UGT88B1	UDP-glycosyltransferase 88B1
Gh_A05G175900	Gh_A12G192500	undirected	0.272271			Gh_D13G022800	CHI	Chalcone--flavonone isomerase
Gh_A05G175900	Gh_Contig00311G000200	undirected	0.261046			Gh_D13G043200	CCOAOMT1	Caffeoyl-CoA O-methyltransferase 1
Gh_A05G175900	Gh_Contig00311G000400	undirected	0.294149
Gh_A05G175900	Gh_Contig01002G001700	undirected	0.333707
Gh_A05G175900	Gh_D02G036800	undirected	0.302164
Gh_A05G175900	Gh_D05G193100	undirected	0.341016
Gh_A05G175900	Gh_D05G322000	undirected	0.216471
Gh_A05G175900	Gh_D07G128700	undirected	0.29281
Gh_A05G175900	Gh_D08G197600	undirected	0.359251
Gh_A05G175900	Gh_D12G061800	undirected	0.385891
Gh_A05G175900	Gh_D12G188200	undirected	0.334681
Gh_A05G175900	Gh_D13G022800	undirected	0.248644
Gh_A05G312100	Gh_A06G008100	undirected	0.142898
Gh_A05G312100	Gh_A10G116000	undirected	0.215663
Gh_A05G312100	Gh_A12G192500	undirected	0.332817
Gh_A05G312100	Gh_Contig00311G000200	undirected	0.211369
Gh_A05G312100	Gh_Contig00311G000400	undirected	0.192478
Gh_A05G312100	Gh_Contig01002G001700	undirected	0.161768
Gh_A05G312100	Gh_D02G036800	undirected	0.258221
Gh_A05G312100	Gh_D05G193100	undirected	0.210482
Gh_A05G312100	Gh_D05G322000	undirected	0.305765
Gh_A05G312100	Gh_D08G197600	undirected	0.131783
Gh_A05G312100	Gh_D12G061800	undirected	0.185508
Gh_A05G312100	Gh_D12G188200	undirected	0.224
Gh_A06G008100	Gh_A10G116000	undirected	0.126314
Gh_A06G008100	Gh_A12G192500	undirected	0.206677
Gh_A06G008100	Gh_Contig00311G000200	undirected	0.182622
Gh_A06G008100	Gh_Contig00311G000400	undirected	0.103916
Gh_A06G008100	Gh_D02G036800	undirected	0.185735
Gh_A06G008100	Gh_D05G193100	undirected	0.139861
Gh_A06G008100	Gh_D05G322000	undirected	0.12334
Gh_A06G008100	Gh_D12G188200	undirected	0.126574
Gh_A07G130000	Gh_A10G116000	undirected	0.155139
Gh_A07G130000	Gh_A12G192500	undirected	0.131194
Gh_A07G130000	Gh_Contig00311G000400	undirected	0.166702
Gh_A07G130000	Gh_Contig01002G001700	undirected	0.10763
Gh_A07G130000	Gh_D02G036800	undirected	0.119088
Gh_A07G130000	Gh_D05G193100	undirected	0.109699
Gh_A07G130000	Gh_D12G061800	undirected	0.127996
Gh_A07G130000	Gh_D12G188200	undirected	0.168471
Gh_A07G130200	Gh_A10G116000	undirected	0.134296
Gh_A07G130200	Gh_A12G192500	undirected	0.104294
Gh_A07G130200	Gh_Contig00311G000400	undirected	0.173678
Gh_A07G130200	Gh_Contig01002G001700	undirected	0.144953
Gh_A07G130200	Gh_D02G036800	undirected	0.104066
Gh_A07G130200	Gh_D07G128700	undirected	0.103612
Gh_A07G130200	Gh_D12G188200	undirected	0.155726
Gh_A07G130200	Gh_D13G022800	undirected	0.126077
Gh_A10G116000	Gh_A12G192500	undirected	0.267956
Gh_A10G116000	Gh_Contig00311G000200	undirected	0.27084
Gh_A10G116000	Gh_Contig00311G000400	undirected	0.307831
Gh_A10G116000	Gh_Contig01002G001700	undirected	0.335282
Gh_A10G116000	Gh_D02G036800	undirected	0.309224
Gh_A10G116000	Gh_D05G193100	undirected	0.334499
Gh_A10G116000	Gh_D05G322000	undirected	0.2092
Gh_A10G116000	Gh_D07G128700	undirected	0.305704
Gh_A10G116000	Gh_D08G197600	undirected	0.348783
Gh_A10G116000	Gh_D12G061800	undirected	0.393585
Gh_A10G116000	Gh_D12G188200	undirected	0.347155
Gh_A10G116000	Gh_D13G022800	undirected	0.255137
Gh_A12G192500	Gh_Contig00311G000200	undirected	0.309774
Gh_A12G192500	Gh_Contig00311G000400	undirected	0.258875
Gh_A12G192500	Gh_Contig01002G001700	undirected	0.252499
Gh_A12G192500	Gh_D02G036800	undirected	0.323209
Gh_A12G192500	Gh_D05G193100	undirected	0.298595
Gh_A12G192500	Gh_D05G322000	undirected	0.343754
Gh_A12G192500	Gh_D07G128700	undirected	0.164529
Gh_A12G192500	Gh_D08G197600	undirected	0.23548
Gh_A12G192500	Gh_D12G061800	undirected	0.25305
Gh_A12G192500	Gh_D12G188200	undirected	0.290042
Gh_A12G192500	Gh_D13G022800	undirected	0.14167
Gh_Contig00311G000200	Gh_Contig00311G000400	undirected	0.214488
Gh_Contig00311G000200	Gh_Contig01002G001700	undirected	0.198299
Gh_Contig00311G000200	Gh_D02G036800	undirected	0.305142
Gh_Contig00311G000200	Gh_D05G193100	undirected	0.243629
Gh_Contig00311G000200	Gh_D05G322000	undirected	0.213995
Gh_Contig00311G000200	Gh_D07G128700	undirected	0.120917
Gh_Contig00311G000200	Gh_D08G197600	undirected	0.16731
Gh_Contig00311G000200	Gh_D12G061800	undirected	0.208912
Gh_Contig00311G000200	Gh_D12G188200	undirected	0.263758
Gh_Contig00311G000200	Gh_D13G022800	undirected	0.112013
Gh_Contig00311G000400	Gh_Contig01002G001700	undirected	0.268022
Gh_Contig00311G000400	Gh_D02G036800	undirected	0.247823
Gh_Contig00311G000400	Gh_D05G193100	undirected	0.217276
Gh_Contig00311G000400	Gh_D05G322000	undirected	0.193157
Gh_Contig00311G000400	Gh_D07G128700	undirected	0.259218
Gh_Contig00311G000400	Gh_D08G197600	undirected	0.170396
Gh_Contig00311G000400	Gh_D12G061800	undirected	0.254285
Gh_Contig00311G000400	Gh_D12G188200	undirected	0.310501
Gh_Contig00311G000400	Gh_D13G022800	undirected	0.245267
Gh_Contig01002G001700	Gh_D02G036800	undirected	0.252176
Gh_Contig01002G001700	Gh_D05G193100	undirected	0.240876
Gh_Contig01002G001700	Gh_D05G322000	undirected	0.140266
Gh_Contig01002G001700	Gh_D07G128700	undirected	0.221617
Gh_Contig01002G001700	Gh_D08G197600	undirected	0.181399
Gh_Contig01002G001700	Gh_D12G061800	undirected	0.278534
Gh_Contig01002G001700	Gh_D12G188200	undirected	0.303488
Gh_Contig01002G001700	Gh_D13G022800	undirected	0.241396
Gh_D02G036800	Gh_D05G193100	undirected	0.278623
Gh_D02G036800	Gh_D05G322000	undirected	0.262841
Gh_D02G036800	Gh_D07G128700	undirected	0.170477
Gh_D02G036800	Gh_D08G197600	undirected	0.22605
Gh_D02G036800	Gh_D12G061800	undirected	0.253812
Gh_D02G036800	Gh_D12G188200	undirected	0.284289
Gh_D02G036800	Gh_D13G022800	undirected	0.15142
Gh_D05G193100	Gh_D05G322000	undirected	0.208517
Gh_D05G193100	Gh_D07G128700	undirected	0.178985
Gh_D05G193100	Gh_D08G197600	undirected	0.272777
Gh_D05G193100	Gh_D12G061800	undirected	0.294441
Gh_D05G193100	Gh_D12G188200	undirected	0.270719
Gh_D05G193100	Gh_D13G022800	undirected	0.150089
Gh_D05G322000	Gh_D08G197600	undirected	0.116997
Gh_D05G322000	Gh_D12G061800	undirected	0.179132
Gh_D05G322000	Gh_D12G188200	undirected	0.223797
Gh_D07G128700	Gh_D08G197600	undirected	0.150553
Gh_D07G128700	Gh_D12G061800	undirected	0.274535
Gh_D07G128700	Gh_D12G188200	undirected	0.264968
Gh_D07G128700	Gh_D13G022800	undirected	0.223785
Gh_D08G197600	Gh_D12G061800	undirected	0.337361
Gh_D08G197600	Gh_D12G188200	undirected	0.230204
Gh_D08G197600	Gh_D13G022800	undirected	0.110524
Gh_D12G061800	Gh_D12G188200	undirected	0.28913
Gh_D12G061800	Gh_D13G022800	undirected	0.206006
Gh_D12G188200	Gh_D13G022800	undirected	0.246843
Gh_A02G098300	Gh_A05G175900	undirected	0.356191
Gh_A02G098300	Gh_A05G312100	undirected	0.198517
Gh_A02G098300	Gh_A06G008100	undirected	0.111394
Gh_A02G098300	Gh_A07G130000	undirected	0.158087
Gh_A02G098300	Gh_A07G130200	undirected	0.138149
Gh_A02G098300	Gh_A10G116000	undirected	0.360777
Gh_A02G098300	Gh_A12G192500	undirected	0.253249
Gh_A02G098300	Gh_Contig00311G000200	undirected	0.222468
Gh_A02G098300	Gh_Contig00311G000400	undirected	0.283676
Gh_A02G098300	Gh_Contig01002G001700	undirected	0.299799
Gh_A02G098300	Gh_D02G036800	undirected	0.258863
Gh_A02G098300	Gh_D05G193100	undirected	0.293931
Gh_A02G098300	Gh_D05G322000	undirected	0.190277
Gh_A02G098300	Gh_D07G128700	undirected	0.29153
Gh_A02G098300	Gh_D08G197600	undirected	0.30188
Gh_A02G098300	Gh_D12G061800	undirected	0.356135
Gh_A02G098300	Gh_D12G188200	undirected	0.306172
Gh_A02G098300	Gh_D13G022800	undirected	0.243336
Gh_A02G170000	Gh_A05G175900	undirected	0.205615
Gh_A02G170000	Gh_A05G312100	undirected	0.21831
Gh_A02G170000	Gh_A06G008100	undirected	0.22076
Gh_A02G170000	Gh_A10G116000	undirected	0.201156
Gh_A02G170000	Gh_A12G192500	undirected	0.271642
Gh_A02G170000	Gh_Contig00311G000200	undirected	0.241248
Gh_A02G170000	Gh_Contig00311G000400	undirected	0.152413
Gh_A02G170000	Gh_Contig01002G001700	undirected	0.161145
Gh_A02G170000	Gh_D02G036800	undirected	0.242052
Gh_A02G170000	Gh_D05G193100	undirected	0.207975
Gh_A02G170000	Gh_D05G322000	undirected	0.220264
Gh_A02G170000	Gh_D08G197600	undirected	0.154769
Gh_A02G170000	Gh_D12G061800	undirected	0.163942
Gh_A02G170000	Gh_D12G188200	undirected	0.185059
Gh_A03G170000	Gh_A05G175900	undirected	0.117495
Gh_A03G170000	Gh_A10G116000	undirected	0.108856
Gh_A03G170000	Gh_A12G192500	undirected	0.109638
Gh_A03G170000	Gh_D12G061800	undirected	0.106237
Gh_A04G074100	Gh_A05G175900	undirected	0.255969
Gh_A04G074100	Gh_A05G312100	undirected	0.115741
Gh_A04G074100	Gh_A10G116000	undirected	0.256645
Gh_A04G074100	Gh_A12G192500	undirected	0.20353
Gh_A04G074100	Gh_Contig00311G000200	undirected	0.147715
Gh_A04G074100	Gh_Contig00311G000400	undirected	0.137299
Gh_A04G074100	Gh_Contig01002G001700	undirected	0.135153
Gh_A04G074100	Gh_D02G036800	undirected	0.180078
Gh_A04G074100	Gh_D05G193100	undirected	0.205696
Gh_A04G074100	Gh_D05G322000	undirected	0.106062
Gh_A04G074100	Gh_D07G128700	undirected	0.107623
Gh_A04G074100	Gh_D08G197600	undirected	0.19516
Gh_A04G074100	Gh_D12G061800	undirected	0.241927
Gh_A04G074100	Gh_D12G188200	undirected	0.173441
Gh_A04G117100	Gh_A05G175900	undirected	0.323852
Gh_A04G117100	Gh_A05G312100	undirected	0.136809
Gh_A04G117100	Gh_A10G116000	undirected	0.307619
Gh_A04G117100	Gh_A12G192500	undirected	0.226011
Gh_A04G117100	Gh_Contig00311G000200	undirected	0.146028
Gh_A04G117100	Gh_Contig00311G000400	undirected	0.16198
Gh_A04G117100	Gh_Contig01002G001700	undirected	0.181476
Gh_A04G117100	Gh_D02G036800	undirected	0.198089
Gh_A04G117100	Gh_D05G193100	undirected	0.232659
Gh_A04G117100	Gh_D05G322000	undirected	0.12808
Gh_A04G117100	Gh_D07G128700	undirected	0.150011
Gh_A04G117100	Gh_D08G197600	undirected	0.236965
Gh_A04G117100	Gh_D12G061800	undirected	0.30411
Gh_A04G117100	Gh_D12G188200	undirected	0.204245
Gh_A04G117100	Gh_D13G022800	undirected	0.117857
Gh_A07G078600	Gh_A10G116000	undirected	0.210305
Gh_A07G078600	Gh_A12G192500	undirected	0.272216
Gh_A07G078600	Gh_Contig00311G000200	undirected	0.174903
Gh_A07G078600	Gh_Contig00311G000400	undirected	0.165259
Gh_A07G078600	Gh_Contig01002G001700	undirected	0.154373
Gh_A07G078600	Gh_D02G036800	undirected	0.207307
Gh_A07G078600	Gh_D05G193100	undirected	0.193178
Gh_A07G078600	Gh_D05G322000	undirected	0.223536
Gh_A07G078600	Gh_D07G128700	undirected	0.10399
Gh_A07G078600	Gh_D08G197600	undirected	0.141635
Gh_A07G078600	Gh_D12G061800	undirected	0.190573
Gh_A07G078600	Gh_D12G188200	undirected	0.189594
Gh_A08G104300	Gh_A10G116000	undirected	0.251999
Gh_A08G104300	Gh_A12G192500	undirected	0.18647
Gh_A08G104300	Gh_Contig00311G000200	undirected	0.137503
Gh_A08G104300	Gh_Contig00311G000400	undirected	0.304128
Gh_A08G104300	Gh_Contig01002G001700	undirected	0.180497
Gh_A08G104300	Gh_D02G036800	undirected	0.179649
Gh_A08G104300	Gh_D05G193100	undirected	0.154887
Gh_A08G104300	Gh_D05G322000	undirected	0.118333
Gh_A08G104300	Gh_D07G128700	undirected	0.193496
Gh_A08G104300	Gh_D08G197600	undirected	0.104033
Gh_A08G104300	Gh_D12G061800	undirected	0.217898
Gh_A08G104300	Gh_D12G188200	undirected	0.276514
Gh_A08G104300	Gh_D13G022800	undirected	0.130815
Gh_A12G064100	Gh_A12G192500	undirected	0.249786
Gh_A12G064100	Gh_Contig00311G000200	undirected	0.213074
Gh_A12G064100	Gh_Contig00311G000400	undirected	0.2787
Gh_A12G064100	Gh_Contig01002G001700	undirected	0.302503
Gh_A12G064100	Gh_D02G036800	undirected	0.259171
Gh_A12G064100	Gh_D05G193100	undirected	0.296964
Gh_A12G064100	Gh_D05G322000	undirected	0.177611
Gh_A12G064100	Gh_D07G128700	undirected	0.310418
Gh_A12G064100	Gh_D08G197600	undirected	0.332462
Gh_A12G064100	Gh_D12G061800	undirected	0.391725
Gh_A12G064100	Gh_D12G188200	undirected	0.30824
Gh_A12G064100	Gh_D13G022800	undirected	0.243768
Gh_A12G229400	Gh_Contig00311G000200	undirected	0.130964
Gh_A12G229400	Gh_Contig00311G000400	undirected	0.151445
Gh_A12G229400	Gh_Contig01002G001700	undirected	0.143547
Gh_A12G229400	Gh_D02G036800	undirected	0.189035
Gh_A12G229400	Gh_D05G193100	undirected	0.229472
Gh_A12G229400	Gh_D07G128700	undirected	0.115582
Gh_A12G229400	Gh_D08G197600	undirected	0.256468
Gh_A12G229400	Gh_D12G061800	undirected	0.345943
Gh_A12G229400	Gh_D12G188200	undirected	0.201376
Gh_A13G061700	Gh_Contig00311G000400	undirected	0.126983
Gh_A13G061700	Gh_D12G188200	undirected	0.110882
Gh_D01G213500	Gh_D08G197600	undirected	0.101853
Gh_D01G213500	Gh_D12G061800	undirected	0.115868
Gh_D04G129200	Gh_D05G193100	undirected	0.121476
Gh_D04G129200	Gh_D12G061800	undirected	0.135999
Gh_D04G129200	Gh_D12G188200	undirected	0.111841
Gh_D04G157000	Gh_D05G193100	undirected	0.265847
Gh_D04G157000	Gh_D05G322000	undirected	0.153068
Gh_D04G157000	Gh_D07G128700	undirected	0.217024
Gh_D04G157000	Gh_D08G197600	undirected	0.307697
Gh_D04G157000	Gh_D12G061800	undirected	0.346651
Gh_D04G157000	Gh_D12G188200	undirected	0.237144
Gh_D04G157000	Gh_D13G022800	undirected	0.171008
Gh_D05G127500	Gh_D05G193100	undirected	0.104979
Gh_D06G006600	Gh_D12G061800	undirected	0.131348
Gh_D06G006600	Gh_D12G188200	undirected	0.166589
Gh_D06G107200	Gh_D08G197600	undirected	0.116282
Gh_D06G107200	Gh_D12G061800	undirected	0.116744
Gh_D07G078700	Gh_D07G128700	undirected	0.27
Gh_D07G078700	Gh_D08G197600	undirected	0.161292
Gh_D07G078700	Gh_D12G061800	undirected	0.281865
Gh_D07G078700	Gh_D12G188200	undirected	0.274254
Gh_D07G078700	Gh_D13G022800	undirected	0.260048
Gh_D09G081000	Gh_D13G043200	undirected	0.109888
Gh_D10G245400	Gh_D13G043200	undirected	0.1038
Gh_A02G031300	Gh_A02G098300	undirected	0.174232
Gh_A02G031300	Gh_A07G078600	undirected	0.10358
Gh_A02G031300	Gh_A08G104300	undirected	0.106308
Gh_A02G031300	Gh_A12G064100	undirected	0.150287
Gh_A02G031300	Gh_D06G006600	undirected	0.115974
Gh_A02G031300	Gh_D07G078700	undirected	0.173089
Gh_A05G175900	Gh_A07G078600	undirected	0.220844
Gh_A05G175900	Gh_A08G104300	undirected	0.229681
Gh_A05G175900	Gh_A12G064100	undirected	0.387514
Gh_A05G175900	Gh_A12G229400	undirected	0.327407
Gh_A05G175900	Gh_D01G213500	undirected	0.104165
Gh_A05G175900	Gh_D04G129200	undirected	0.139532
Gh_A05G175900	Gh_D04G157000	undirected	0.362891
Gh_A05G175900	Gh_D05G127500	undirected	0.120014
Gh_A05G175900	Gh_D06G006600	undirected	0.170041
Gh_A05G175900	Gh_D06G107200	undirected	0.138261
Gh_A05G175900	Gh_D07G078700	undirected	0.31037
Gh_A05G175900	Gh_D12G223900	undirected	0.158444
Gh_A05G175900	Gossypium_hirsutum_newGene_3014	undirected	0.341867
Gh_A05G312100	Gh_A07G078600	undirected	0.219542
Gh_A05G312100	Gh_A08G104300	undirected	0.135307
Gh_A05G312100	Gh_A12G064100	undirected	0.185273
Gh_A05G312100	Gh_A12G229400	undirected	0.109881
Gh_A05G312100	Gh_D04G157000	undirected	0.161484
Gh_A05G312100	Gh_D06G006600	undirected	0.178834
Gh_A05G312100	Gh_D07G078700	undirected	0.125229
Gh_A05G312100	Gossypium_hirsutum_newGene_3014	undirected	0.126334
Gh_A06G008100	Gh_A07G078600	undirected	0.149741
Gh_A06G008100	Gh_D06G006600	undirected	0.204511
Gh_A07G130000	Gh_A12G064100	undirected	0.141982
Gh_A07G130000	Gh_D04G157000	undirected	0.107845
Gh_A07G130000	Gh_D07G078700	undirected	0.124085
Gh_A07G130200	Gh_A12G064100	undirected	0.116203
Gh_A07G130200	Gh_D07G078700	undirected	0.157556
Gh_A10G116000	Gh_A12G064100	undirected	0.396356
Gh_A10G116000	Gh_A12G229400	undirected	0.330505
Gh_A10G116000	Gh_D01G213500	undirected	0.11238
Gh_A10G116000	Gh_D04G129200	undirected	0.150053
Gh_A10G116000	Gh_D04G157000	undirected	0.353361
Gh_A10G116000	Gh_D05G127500	undirected	0.115145
Gh_A10G116000	Gh_D06G006600	undirected	0.165266
Gh_A10G116000	Gh_D06G107200	undirected	0.126148
Gh_A10G116000	Gh_D07G078700	undirected	0.315612
Gh_A10G116000	Gh_D12G223900	undirected	0.166183
Gh_A10G116000	Gossypium_hirsutum_newGene_3014	undirected	0.355849
Gh_A12G192500	Gh_A12G229400	undirected	0.198122
Gh_A12G192500	Gh_A13G061700	undirected	0.103051
Gh_A12G192500	Gh_D01G056900	undirected	0.118117
Gh_A12G192500	Gh_D04G129200	undirected	0.144219
Gh_A12G192500	Gh_D04G157000	undirected	0.239621
Gh_A12G192500	Gh_D05G127500	undirected	0.119053
Gh_A12G192500	Gh_D06G006600	undirected	0.246101
Gh_A12G192500	Gh_D06G107200	undirected	0.102341
Gh_A12G192500	Gh_D07G078700	undirected	0.201531
Gh_A12G192500	Gh_D12G274000	undirected	0.137138
Gh_A12G192500	Gossypium_hirsutum_newGene_3014	undirected	0.217607
Gh_Contig00311G000200	Gh_D04G129200	undirected	0.110626
Gh_Contig00311G000200	Gh_D04G157000	undirected	0.176321
Gh_Contig00311G000200	Gh_D06G006600	undirected	0.191896
Gh_Contig00311G000200	Gh_D07G078700	undirected	0.14076
Gh_Contig00311G000200	Gh_D12G274000	undirected	0.115377
Gh_Contig00311G000200	Gossypium_hirsutum_newGene_3014	undirected	0.154657
Gh_Contig00311G000400	Gh_D04G157000	undirected	0.200895
Gh_Contig00311G000400	Gh_D06G006600	undirected	0.144846
Gh_Contig00311G000400	Gh_D07G078700	undirected	0.263377
Gh_Contig00311G000400	Gossypium_hirsutum_newGene_3014	undirected	0.228175
Gh_Contig01002G001700	Gh_D04G157000	undirected	0.240639
Gh_Contig01002G001700	Gh_D06G006600	undirected	0.131194
Gh_Contig01002G001700	Gh_D07G078700	undirected	0.230239
Gh_Contig01002G001700	Gossypium_hirsutum_newGene_3014	undirected	0.186627
Gh_D02G036800	Gh_D04G129200	undirected	0.125977
Gh_D02G036800	Gh_D04G157000	undirected	0.216716
Gh_D02G036800	Gh_D05G127500	undirected	0.100508
Gh_D02G036800	Gh_D06G006600	undirected	0.206863
Gh_D02G036800	Gh_D07G078700	undirected	0.190618
Gh_D02G036800	Gh_D12G274000	undirected	0.125271
Gh_D02G036800	Gossypium_hirsutum_newGene_3014	undirected	0.216357
Gh_D05G193100	Gh_D06G006600	undirected	0.167415
Gh_D05G193100	Gh_D06G107200	undirected	0.114151
Gh_D05G193100	Gh_D07G078700	undirected	0.203003
Gh_D05G193100	Gh_D12G223900	undirected	0.101301
Gh_D05G193100	Gossypium_hirsutum_newGene_3014	undirected	0.237265
Gh_D05G322000	Gh_D06G006600	undirected	0.177613
Gh_D05G322000	Gh_D07G078700	undirected	0.107073
Gh_D05G322000	Gossypium_hirsutum_newGene_3014	undirected	0.106224
Gh_D07G128700	Gossypium_hirsutum_newGene_3014	undirected	0.167112
Gh_D08G197600	Gh_D12G223900	undirected	0.143038
Gh_D08G197600	Gossypium_hirsutum_newGene_3014	undirected	0.222009
Gh_D12G061800	Gh_D12G223900	undirected	0.191473
Gh_D12G061800	Gossypium_hirsutum_newGene_3014	undirected	0.343975
Gh_D12G188200	Gossypium_hirsutum_newGene_3014	undirected	0.27528
Gh_D13G022800	Gossypium_hirsutum_newGene_3014	undirected	0.104668

## Sheet: B
Source	Target	Type	Weight		Gene ID	Gene Name	Description
HD-ZIP	Gh_D12G259500	undirected	0.146257		Gh_D12G259500	ATHB-7	Homeobox-leucine zipper protein ATHB-7
BHLH87	Gh_D12G259500	undirected	0.110346		Gh_D04G001100	LRK10	Rust resistance kinase Lr10
SARD1	Gh_D04G001100	undirected	0.106657		Gh_D05G364600	NA	NA
SARD1	Gh_D05G364600	undirected	0.103377		Gh_D11G177200	LRK10L-2.4	LEAF RUST 10 DISEASE-RESISTANCE LOCUS RECEPTOR-LIKE PROTEIN KINASE-like 2.4
SARD1	Gh_D11G177200	undirected	0.115869		Gh_A06G117000	HLB1	Protein HLB1
BZIP19	Gh_A06G117000	undirected	0.545628		Gh_A07G035400	ACA2	Calcium-transporting ATPase 2, plasma membrane-type
BZIP19	Gh_A07G035400	undirected	0.116738		Gh_A07G071000	CYCH1-1	Cyclin-H1-1
BZIP19	Gh_A07G071000	undirected	0.54462		Gh_A09G130600	NA	NA
BZIP19	Gh_A09G130600	undirected	0.512542		Gh_A09G132000	NA	NA
BZIP19	Gh_A09G132000	undirected	0.235763		Gh_A11G130900	RRF	Ribosome-recycling factor, chloroplastic
BZIP19	Gh_A11G130900	undirected	0.497554		Gh_A11G166100	GABA-TP3	Gamma aminobutyrate transaminase 3, chloroplastic
BZIP19	Gh_A11G166100	undirected	0.536614		Gh_A11G192400	NA	NA
BZIP19	Gh_A11G192400	undirected	0.514933		Gh_A11G238000	At5g24010	Probable receptor-like protein kinase At5g24010
BZIP19	Gh_A11G238000	undirected	0.231147		Gh_A11G293500	HIS2A	Histone H2AX
BZIP19	Gh_A11G293500	undirected	0.246944		Gh_A13G170400	NA	NA
BZIP19	Gh_A13G170400	undirected	0.200378		Gh_D01G249600	XBAT35	Putative E3 ubiquitin-protein ligase XBAT35
BZIP19	Gh_D01G249600	undirected	0.274837		Gh_D02G143200	EIF-5A2	Eukaryotic translation initiation factor 5A-2
BZIP19	Gh_D02G143200	undirected	0.591656		Gh_D02G143300	NRP1	Nodulin-related protein 1
BZIP19	Gh_D02G143300	undirected	0.507132		Gh_D02G192300	LRK10L-1.2	LEAF RUST 10 DISEASE-RESISTANCE LOCUS RECEPTOR-LIKE PROTEIN KINASE-like 1.2
BZIP19	Gh_D02G192300	undirected	0.17562		Gh_D04G001300	LRK10	Rust resistance kinase Lr10
BZIP19	Gh_D04G001300	undirected	0.409959		Gh_D04G001800	LRK10	Rust resistance kinase Lr10
BZIP19	Gh_D04G001800	undirected	0.439088		Gh_D04G053100	FTSH6	ATP-dependent zinc metalloprotease FTSH 6, chloroplastic
BZIP19	Gh_D04G053100	undirected	0.224536		Gh_D05G171500	PER42	Peroxidase 42
BZIP19	Gh_D05G171500	undirected	0.131939		Gh_D05G365100	ORF1	DNA polymerase
BZIP19	Gh_D05G365100	undirected	0.110396		Gh_D05G365200	NA	NA
BZIP19	Gh_D05G365200	undirected	0.125037		Gh_D06G083900	EFL3	Protein ELF4-LIKE 3
BZIP19	Gh_D06G083900	undirected	0.111532		Gh_D06G172600	CRK25	Cysteine-rich receptor-like protein kinase 25
BZIP19	Gh_D06G172600	undirected	0.220996		Gh_D07G027400	NA	NA
BZIP19	Gh_D07G027400	undirected	0.565007		Gh_D09G119500	NA	Cysteine proteinase inhibitor
BZIP19	Gh_D09G119500	undirected	0.510204		Gh_D12G217200	NA	NA
BZIP19	Gh_D12G217200	undirected	0.128424		Gh_D13G052300	LECRK91	L-type lectin-domain containing receptor kinase IX.1
BZIP19	Gh_D13G052300	undirected	0.296948		Gh_D13G083600	At3g19950	E3 ubiquitin-protein ligase RING1-like
BZIP19	Gh_D13G083600	undirected	0.203415		Gh_D13G228400	RGA1	Putative disease resistance protein RGA1
BZIP19	Gh_D13G228400	undirected	0.123437		Gh_D13G255500	NA	Metallothionein-like protein 1
BZIP19	Gh_D13G255500	undirected	0.300607
BZIP19	Gossypium_hirsutum_newGene_1213	undirected	0.57538
BZIP19	Gossypium_hirsutum_newGene_13655	undirected	0.437643
BZIP19	Gossypium_hirsutum_newGene_13955	undirected	0.584398
BZIP19	Gossypium_hirsutum_newGene_1786	undirected	0.510532
BZIP19	Gossypium_hirsutum_newGene_2035	undirected	0.35906
BZIP19	Gossypium_hirsutum_newGene_259	undirected	0.583357
BZIP19	Gossypium_hirsutum_newGene_5257	undirected	0.159663

## Sheet: C
Source	Target	Type	Weight		Gene ID	Gene Name	Description
FRS2	Gh_D08G024500	undirected	0.150044		Gh_D07G203100	FRS2	Protein FAR1-RELATED SEQUENCE 2
FRS2	Gh_D08G168100	undirected	0.225768		Gh_D06G130300	SMARCAL1	SWI/SNF-related matrix-associated actin-dependent regulator of chromatin subfamily A-like protein 1
FRS2	Gh_D09G140800	undirected	0.182614		Gh_D05G189200	BBX21	B-box zinc finger protein 21
FRS2	Gh_D09G141300	undirected	0.220577		Gh_A04G064800	F-box	F-box protein At5g06550
FRS2	Gh_D09G181000	undirected	0.217678		Gh_A01G059200	NA	NA
FRS2	Gh_D09G206300	undirected	0.191712		Gh_A01G094500	POLR1C	DNA-directed RNA polymerases I and III subunit RPAC1
FRS2	Gh_D10G046500	undirected	0.224261		Gh_A01G094600	NOP2	Probable 28S rRNA (cytosine(4447)-C(5))-methyltransferase
FRS2	Gh_D10G068500	undirected	0.150406		Gh_A01G102200	ttc27	Tetratricopeptide repeat protein 27 homolog
FRS2	Gh_D10G222800	undirected	0.175041		Gh_A01G208500	ERG	GTP-binding protein ERG
FRS2	Gh_D10G261100	undirected	0.149761		Gh_A02G006700	DBR	2-alkenal reductase (NADP(+)-dependent)
FRS2	Gh_D11G034700	undirected	0.186298		Gh_A02G066100	TIC32	Short-chain dehydrogenase TIC 32, chloroplastic
FRS2	Gh_D11G046000	undirected	0.201052		Gh_A02G157900	NSUN2	tRNA (cytosine(34)-C(5))-methyltransferase
FRS2	Gh_D11G052900	undirected	0.158897		Gh_A02G168800	EMB1270	Pentatricopeptide repeat-containing protein At3g18110, chloroplastic
FRS2	Gh_D11G077000	undirected	0.219738		Gh_A02G184100	Ddb2	DNA damage-binding protein 2
FRS2	Gh_D11G095600	undirected	0.212151		Gh_A03G027000	TUBB1	Tubulin beta-1 chain
FRS2	Gh_D11G111300	undirected	0.181421		Gh_A03G047600	NRPC1	DNA-directed RNA polymerase III subunit 1
FRS2	Gh_D11G116700	undirected	0.174363		Gh_A03G240200	MAA3	Probable helicase MAGATAMA 3
FRS2	Gh_D11G121100	undirected	0.216027		Gh_A04G023200	PDIL5-3	Protein disulfide-isomerase 5-3
FRS2	Gh_D11G138600	undirected	0.271303		Gh_A04G082300	klc-2	Kinesin light chain
FRS2	Gh_D11G169100	undirected	0.1355		Gh_A05G047800	PGR3	Pentatricopeptide repeat-containing protein At4g31850, chloroplastic
FRS2	Gh_D11G171900	undirected	0.218547		Gh_A05G066900	NA	NA
FRS2	Gh_D11G197000	undirected	0.197125		Gh_A05G154900	At4g04670	tRNA wybutosine-synthesizing protein 2/3/4
FRS2	Gh_D11G216400	undirected	0.253703		Gh_A05G155000	THG1	tRNA(His) guanylyltransferase 1
FRS2	Gh_D11G259800	undirected	0.246558		Gh_A05G169500	NA	Tubulin beta-6 chain
FRS2	Gh_D11G273700	undirected	0.263554		Gh_A05G194200	VDAC2	Mitochondrial outer membrane protein porin 2
FRS2	Gh_D11G309300	undirected	0.153129		Gh_A05G207700	ISA3	Isoamylase 3, chloroplastic
FRS2	Gh_D11G318600	undirected	0.275554		Gh_A05G231400	SAMC2	Probable S-adenosylmethionine carrier 2, chloroplastic
FRS2	Gh_D11G321200	undirected	0.218646		Gh_A05G390800	HDA14	Histone deacetylase 14
FRS2	Gh_D12G026000	undirected	0.151916		Gh_A06G012900	NA	NA
FRS2	Gh_D12G113200	undirected	0.146077		Gh_A06G019200	trc	Serine/threonine-protein kinase tricorner
FRS2	Gh_D12G229200	undirected	0.198816		Gh_A06G132100	DPE2	4-alpha-glucanotransferase DPE2
FRS2	Gh_D13G002900	undirected	0.234782		Gh_A06G201600	At3g56030	Pentatricopeptide repeat-containing protein At3g56030
FRS2	Gh_D13G025300	undirected	0.220786		Gh_A06G202600	NA	NA
FRS2	Gh_D13G034800	undirected	0.182712		Gh_A06G219800	MMS19	MMS19 nucleotide excision repair protein homolog
FRS2	Gh_D13G085000	undirected	0.18519		Gh_A07G010300	kansl1l	KAT8 regulatory NSL complex subunit 1-like protein
FRS2	Gh_D13G089100	undirected	0.226892		Gh_A07G039900	NUP205	Nuclear pore complex protein NUP205
FRS2	Gh_D13G119600	undirected	0.219128		Gh_A07G040800	At1g32860	Glucan endo-1,3-beta-glucosidase 11
FRS2	Gh_D13G122500	undirected	0.164127		Gh_A07G091400	Nlrp10	NACHT, LRR and PYD domains-containing protein 10
FRS2	Gh_D13G197800	undirected	0.2049		Gh_A07G153500	At2g25737	Sulfite exporter TauE/SafE family protein 3
FRS2	Gh_D13G219900	undirected	0.143643		Gh_A07G183400	AGO16	Protein argonaute 16
FRS2	Gossypium_hirsutum_newGene_2171	undirected	0.181282		Gh_A07G208000	NA	NA
FRS2	Gossypium_hirsutum_newGene_3481	undirected	0.170163		Gh_A08G169500	Znhit6	Box C/D snoRNA protein 1
FRS2	Gossypium_hirsutum_newGene_4399	undirected	0.151139		Gh_A08G286700	NPF1.2	Protein NRT1/ PTR FAMILY 1.2
FRS2	Gossypium_hirsutum_newGene_518	undirected	0.171825		Gh_A09G001400	At3g26840	Acyltransferase-like protein At3g26840, chloroplastic
FRS2	Gossypium_hirsutum_newGene_9052	undirected	0.164186		Gh_A09G150200	EEF1AKMT1	EEF1A lysine methyltransferase 1
SMARCAL1	Gh_D06G176000	undirected	0.177697		Gh_A09G153500	tex10	Testis-expressed protein 10 homolog
SMARCAL1	Gh_D06G237900	undirected	0.214423		Gh_A09G189600	AAMP	Angio-associated migratory cell protein
SMARCAL1	Gh_D07G068800	undirected	0.167789		Gh_A09G207100	C27H6.8	UPF0160 protein C27H6.8
SMARCAL1	Gh_D07G073400	undirected	0.251448		Gh_A09G273400	WDR74	WD repeat-containing protein 74
SMARCAL1	Gh_D07G090000	undirected	0.205888		Gh_A10G001700	RBCX1	Chaperonin-like RBCX protein 1, chloroplastic
SMARCAL1	Gh_D07G155700	undirected	0.238055		Gh_A10G077100	At4g37920	Uncharacterized protein At4g37920, chloroplastic
SMARCAL1	FRS2	undirected	0.15264		Gh_A11G034600	NRP2	NAP1-related protein 2
SMARCAL1	Gh_D08G024500	undirected	0.207844		Gh_A11G110800	CATHB3	Cathepsin B-like protease 3
SMARCAL1	Gh_D08G168100	undirected	0.209263		Gh_A11G128900	BPG2	GTP-binding protein BRASSINAZOLE INSENSITIVE PALE GREEN 2, chloroplastic
SMARCAL1	Gh_D09G140800	undirected	0.206344		Gh_A11G137700	KLCR1	Protein KINESIN LIGHT CHAIN-RELATED 1
SMARCAL1	Gh_D09G141300	undirected	0.249661		Gh_A11G274900	ILA	Protein ILITYHIA
SMARCAL1	Gh_D09G181000	undirected	0.248618		Gh_A11G277900	DPH6	Diphthine--ammonia ligase
SMARCAL1	Gh_D09G206300	undirected	0.177471		Gh_A11G305300	dnajb6	DnaJ homolog subfamily B member 6
SMARCAL1	Gh_D10G046500	undirected	0.285348		Gh_A11G317400	MORF9	Multiple organellar RNA editing factor 9, chloroplastic
SMARCAL1	Gh_D10G068500	undirected	0.192549		Gh_A12G026900	MEE14	CCG-binding protein 1
SMARCAL1	Gh_D10G222800	undirected	0.176705		Gh_A12G231100	SMN1	Survival motor neuron protein
SMARCAL1	Gh_D10G261100	undirected	0.152395		Gh_A12G234900	At5g46580	Pentatricopeptide repeat-containing protein At5g46580, chloroplastic
SMARCAL1	Gh_D11G034700	undirected	0.262729		Gh_A12G254300	murE	UDP-N-acetylmuramoyl-L-alanyl-D-glutamate--2,6-diaminopimelate ligase
SMARCAL1	Gh_D11G046000	undirected	0.28511		Gh_A12G263200	Mettl17	Methyltransferase-like protein 17, mitochondrial
SMARCAL1	Gh_D11G052900	undirected	0.208003		Gh_A13G033400	NA	Glycine-rich RNA-binding protein
SMARCAL1	Gh_D11G077000	undirected	0.222152		Gh_A13G160700	Mbip	MAP3K12-binding inhibitory protein 1
SMARCAL1	Gh_D11G095600	undirected	0.262102		Gh_A13G183600	RRP6L2	Protein RRP6-like 2
SMARCAL1	Gh_D11G111300	undirected	0.173775		Gh_A13G195100	NOP5-1	Probable nucleolar protein 5-1
SMARCAL1	Gh_D11G116700	undirected	0.155448		Gh_D01G025700	CUL1	Cullin-1
SMARCAL1	Gh_D11G121100	undirected	0.252696		Gh_D01G052900	NA	NA
SMARCAL1	Gh_D11G138600	undirected	0.264296		Gh_D01G090100	POLR1C	DNA-directed RNA polymerases I and III subunit RPAC1
SMARCAL1	Gh_D11G169100	undirected	0.171318		Gh_D01G090200	NOP2	Probable 28S rRNA (cytosine(4447)-C(5))-methyltransferase
SMARCAL1	Gh_D11G171900	undirected	0.222832		Gh_D01G207400	At1g80270	Pentatricopeptide repeat-containing protein At1g80270, mitochondrial
SMARCAL1	Gh_D11G197000	undirected	0.247683		Gh_D02G007300	DBR	2-alkenal reductase (NADP(+)-dependent)
SMARCAL1	Gh_D11G216400	undirected	0.254594		Gh_D02G057400	NHX2	Sodium/hydrogen exchanger 2
SMARCAL1	Gh_D11G259800	undirected	0.273652		Gh_D02G070200	DHRSX	Dehydrogenase/reductase SDR family member on chromosome X
SMARCAL1	Gh_D11G273700	undirected	0.284663		Gh_D02G122700	At3g11710	Lysine--tRNA ligase, cytoplasmic
SMARCAL1	Gh_D11G309300	undirected	0.156176		Gh_D02G133900	NA	NA
SMARCAL1	Gh_D11G318600	undirected	0.273624		Gh_D03G019400	RUS4	Protein root UVB sensitive 4
SMARCAL1	Gh_D11G321200	undirected	0.237613		Gh_D03G041900	NSUN2	tRNA (cytosine(34)-C(5))-methyltransferase
SMARCAL1	Gh_D12G026000	undirected	0.164245		Gh_D03G104800	NRP2	NAP1-related protein 2
SMARCAL1	Gh_D12G113200	undirected	0.175815		Gh_D03G149100	NRPC1	DNA-directed RNA polymerase III subunit 1
SMARCAL1	Gh_D12G229200	undirected	0.299248		Gh_D03G169500	TUBB1	Tubulin beta-1 chain
SMARCAL1	Gh_D13G002900	undirected	0.216261		Gh_D04G034300	HDA14	Histone deacetylase 14
SMARCAL1	Gh_D13G025300	undirected	0.221892		Gh_D04G128800	TSN	Translin
SMARCAL1	Gh_D13G034800	undirected	0.25794		Gh_D05G013800	NA	Uncharacterized protein C19orf47 homolog
SMARCAL1	Gh_D13G085000	undirected	0.189976		Gh_D05G062800	PGR3	Pentatricopeptide repeat-containing protein At4g31850, chloroplastic
SMARCAL1	Gh_D13G089100	undirected	0.283586		Gh_D05G080700	NA	NA
SMARCAL1	Gh_D13G119600	undirected	0.288601		Gh_D05G092900	TRP5	Telomere repeat-binding protein 5
SMARCAL1	Gh_D13G122500	undirected	0.189422		Gh_D05G094300	XBAT31	Putative E3 ubiquitin-protein ligase XBAT31
SMARCAL1	Gh_D13G197800	undirected	0.204384		Gh_D05G171600	At4g04670	tRNA wybutosine-synthesizing protein 2/3/4
SMARCAL1	Gh_D13G219900	undirected	0.194903		Gh_D05G224400	ISA3	Isoamylase 3, chloroplastic
SMARCAL1	Gossypium_hirsutum_newGene_2171	undirected	0.174402		Gh_D05G247600	rplM	50S ribosomal protein L13
SMARCAL1	Gossypium_hirsutum_newGene_3481	undirected	0.171746		Gh_D05G380400	RH32	DEAD-box ATP-dependent RNA helicase 32
SMARCAL1	Gossypium_hirsutum_newGene_4399	undirected	0.179828		Gh_D06G018500	trc	Serine/threonine-protein kinase tricorner
SMARCAL1	Gossypium_hirsutum_newGene_518	undirected	0.166935		Gh_D06G019000	RID3	Protein ROOT INITIATION DEFECTIVE 3
SMARCAL1	Gossypium_hirsutum_newGene_9052	undirected	0.227567		Gh_D06G099400	SHM3	Serine hydroxymethyltransferase 3, chloroplastic
BBX21	Gh_D05G224400	undirected	0.262896		Gh_D06G106700	EMB2001	GTP-binding protein At2g22870
BBX21	Gh_D05G247600	undirected	0.223781		Gh_D06G122000	topA	DNA topoisomerase 1
BBX21	Gh_D05G380400	undirected	0.268		Gh_D06G176000	CLS	Cardiolipin synthase (CMP-forming), mitochondrial
BBX21	Gh_D06G018500	undirected	0.29392		Gh_D06G237900	YOR059C	Putative lipase YOR059C
BBX21	Gh_D06G019000	undirected	0.238616		Gh_D07G068800	NRP2	NAP1-related protein 2
BBX21	Gh_D06G099400	undirected	0.21313		Gh_D07G073400	RBG3	Glycine-rich RNA-binding protein 3, mitochondrial
BBX21	Gh_D06G106700	undirected	0.263412		Gh_D07G090000	Nlrp14	NACHT, LRR and PYD domains-containing protein 14
BBX21	Gh_D06G122000	undirected	0.256073		Gh_D07G155700	At4g31010	CRS2-associated factor 1, mitochondrial
BBX21	SMARCAL1	undirected	0.143131		Gh_D08G024500	NA	NA
BBX21	Gh_D06G176000	undirected	0.127646		Gh_D08G168100	Znhit6	Box C/D snoRNA protein 1
BBX21	Gh_D06G237900	undirected	0.201715		Gh_D09G140800	EEF1AKMT1	EEF1A lysine methyltransferase 1
BBX21	Gh_D07G068800	undirected	0.189975		Gh_D09G141300	EEF1AKMT1	EEF1A lysine methyltransferase 1
BBX21	Gh_D07G073400	undirected	0.250001		Gh_D09G181000	AAMP	Angio-associated migratory cell protein
BBX21	Gh_D07G090000	undirected	0.131253		Gh_D09G206300	tal	Transaldolase
BBX21	Gh_D07G155700	undirected	0.182165		Gh_D10G046500	At2g35130	Pentatricopeptide repeat-containing protein At2g35130
BBX21	FRS2	undirected	0.180504		Gh_D10G068500	SHH1	Protein SAWADEE HOMEODOMAIN HOMOLOG 1
BBX21	Gh_D08G024500	undirected	0.145672		Gh_D10G222800	chmp5	Charged multivesicular body protein 5
BBX21	Gh_D08G168100	undirected	0.238689		Gh_D10G261100	HESO1	Protein HESO1
BBX21	Gh_D09G140800	undirected	0.180702		Gh_D11G034700	NRP2	NAP1-related protein 2
BBX21	Gh_D09G141300	undirected	0.218368		Gh_D11G046000	TAF14B	Transcription initiation factor TFIID subunit 14b
BBX21	Gh_D09G181000	undirected	0.225728		Gh_D11G052900	HD6	Casein kinase II subunit alpha-2
BBX21	Gh_D09G206300	undirected	0.194211		Gh_D11G077000	trmH	tRNA (guanosine(18)-2'-O)-methyltransferase
BBX21	Gh_D10G046500	undirected	0.237806		Gh_D11G095600	AHL9	AT-hook motif nuclear-localized protein 9
BBX21	Gh_D10G068500	undirected	0.156934		Gh_D11G111300	CATHB2	Cathepsin B-like protease 2
BBX21	Gh_D10G222800	undirected	0.163143		Gh_D11G116700	At2g31400	Pentatricopeptide repeat-containing protein At2g31400, chloroplastic
BBX21	Gh_D10G261100	undirected	0.158451		Gh_D11G121100	GATL7	Probable galacturonosyltransferase-like 7
BBX21	Gh_D11G034700	undirected	0.18474		Gh_D11G138600	KLCR1	Protein KINESIN LIGHT CHAIN-RELATED 1
BBX21	Gh_D11G046000	undirected	0.191691		Gh_D11G169100	FER	Receptor-like protein kinase FERONIA
BBX21	Gh_D11G052900	undirected	0.166954		Gh_D11G171900	RPOT2-TOM	DNA-directed RNA polymerase 2B, chloroplastic/mitochondrial
BBX21	Gh_D11G077000	undirected	0.211365		Gh_D11G197000	nol6	Nucleolar protein 6
BBX21	Gh_D11G095600	undirected	0.206387		Gh_D11G216400	ELF3-2	ELF3-like protein 2
BBX21	Gh_D11G111300	undirected	0.202363		Gh_D11G259800	RRP6L2	Protein RRP6-like 2
BBX21	Gh_D11G116700	undirected	0.193887		Gh_D11G273700	ILA	Protein ILITYHIA
BBX21	Gh_D11G121100	undirected	0.228978		Gh_D11G309300	At1g09420	Glucose-6-phosphate 1-dehydrogenase 4, chloroplastic
BBX21	Gh_D11G138600	undirected	0.277911		Gh_D11G318600	MORF9	Multiple organellar RNA editing factor 9, chloroplastic
BBX21	Gh_D11G169100	undirected	0.147777		Gh_D11G321200	BRIX1-1	Ribosome biogenesis protein BRX1 homolog 1
BBX21	Gh_D11G171900	undirected	0.232479		Gh_D12G026000	MEE14	CCG-binding protein 1
BBX21	Gh_D11G197000	undirected	0.205226		Gh_D12G113200	At2g01680	Ankyrin repeat-containing protein At2g01680
BBX21	Gh_D11G216400	undirected	0.263196		Gh_D12G229200	At5g46580	Pentatricopeptide repeat-containing protein At5g46580, chloroplastic
BBX21	Gh_D11G259800	undirected	0.252066		Gh_D13G002900	SEN2	tRNA-splicing endonuclease subunit Sen2-2
BBX21	Gh_D11G273700	undirected	0.259919		Gh_D13G025300	SCPL27	Serine carboxypeptidase-like 27
BBX21	Gh_D11G309300	undirected	0.167424		Gh_D13G034800	NA	Glycine-rich RNA-binding protein
BBX21	Gh_D11G318600	undirected	0.288357		Gh_D13G085000	PUMP3	Mitochondrial uncoupling protein 3
BBX21	Gh_D11G321200	undirected	0.225252		Gh_D13G089100	STP-1	Alpha-1,4 glucan phosphorylase L-2 isozyme, chloroplastic/amyloplastic
BBX21	Gh_D12G026000	undirected	0.195802		Gh_D13G119600	PPR4	Pentatricopeptide repeat-containing protein At5g04810, chloroplastic
BBX21	Gh_D12G113200	undirected	0.15091		Gh_D13G122500	HST1	Protein HASTY 1
BBX21	Gh_D12G229200	undirected	0.201101		Gh_D13G197800	HST1	Protein HASTY 1
BBX21	Gh_D13G002900	undirected	0.246673		Gh_D13G219900	At3g45310	Thiol protease aleurain-like
BBX21	Gh_D13G025300	undirected	0.233883
BBX21	Gh_D13G034800	undirected	0.191446
BBX21	Gh_D13G085000	undirected	0.187926
BBX21	Gh_D13G089100	undirected	0.236006
BBX21	Gh_D13G119600	undirected	0.221074
BBX21	Gh_D13G122500	undirected	0.147877
BBX21	Gh_D13G197800	undirected	0.188274
BBX21	Gh_D13G219900	undirected	0.161962
BBX21	Gossypium_hirsutum_newGene_2171	undirected	0.18438
BBX21	Gossypium_hirsutum_newGene_3481	undirected	0.19062
BBX21	Gossypium_hirsutum_newGene_4399	undirected	0.18389
BBX21	Gossypium_hirsutum_newGene_518	undirected	0.186718
BBX21	Gossypium_hirsutum_newGene_9052	undirected	0.169086
F-box	Gh_A04G082300	undirected	0.209594
F-box	Gh_A05G047800	undirected	0.186345
F-box	Gh_A05G066900	undirected	0.21712
F-box	Gh_A05G154900	undirected	0.233256
F-box	Gh_A05G155000	undirected	0.180578
F-box	Gh_A05G169500	undirected	0.174041
F-box	Gh_A05G194200	undirected	0.284376
F-box	Gh_A05G207700	undirected	0.180952
F-box	Gh_A05G231400	undirected	0.195041
F-box	Gh_A05G390800	undirected	0.256855
F-box	Gh_A06G012900	undirected	0.26439
F-box	Gh_A06G019200	undirected	0.30843
F-box	Gh_A06G132100	undirected	0.234335
F-box	Gh_A06G201600	undirected	0.157313
F-box	Gh_A06G202600	undirected	0.218542
F-box	Gh_A06G219800	undirected	0.171595
F-box	Gh_A07G010300	undirected	0.263239
F-box	Gh_A07G039900	undirected	0.257843
F-box	Gh_A07G040800	undirected	0.149074
F-box	Gh_A07G091400	undirected	0.176835
F-box	Gh_A07G153500	undirected	0.165813
F-box	Gh_A07G183400	undirected	0.164692
F-box	Gh_A07G208000	undirected	0.263638
F-box	Gh_A08G169500	undirected	0.283238
F-box	Gh_A08G286700	undirected	0.154675
F-box	Gh_A09G001400	undirected	0.191945
F-box	Gh_A09G150200	undirected	0.198395
F-box	Gh_A09G153500	undirected	0.208169
F-box	Gh_A09G189600	undirected	0.244014
F-box	Gh_A09G207100	undirected	0.150556
F-box	Gh_A09G273400	undirected	0.204003
F-box	Gh_A10G001700	undirected	0.206303
F-box	Gh_A10G077100	undirected	0.255572
F-box	Gh_A11G034600	undirected	0.266153
F-box	Gh_A11G110800	undirected	0.227235
F-box	Gh_A11G128900	undirected	0.203462
F-box	Gh_A11G137700	undirected	0.276318
F-box	Gh_A11G274900	undirected	0.178497
F-box	Gh_A11G277900	undirected	0.220151
F-box	Gh_A11G305300	undirected	0.173194
F-box	Gh_A11G317400	undirected	0.27538
F-box	Gh_A12G026900	undirected	0.165842
F-box	Gh_A12G231100	undirected	0.182205
F-box	Gh_A12G234900	undirected	0.249285
F-box	Gh_A12G254300	undirected	0.29324
F-box	Gh_A12G263200	undirected	0.22419
F-box	Gh_A13G033400	undirected	0.265745
F-box	Gh_A13G160700	undirected	0.249553
F-box	Gh_A13G183600	undirected	0.208642
F-box	Gh_A13G195100	undirected	0.23746
F-box	Gh_D01G025700	undirected	0.137298
F-box	Gh_D01G052900	undirected	0.254921
F-box	Gh_D01G090100	undirected	0.246596
F-box	Gh_D01G090200	undirected	0.309181
F-box	Gh_D01G207400	undirected	0.241815
F-box	Gh_D02G007300	undirected	0.263069
F-box	Gh_D02G057400	undirected	0.161498
F-box	Gh_D02G070200	undirected	0.242232
F-box	Gh_D02G122700	undirected	0.19002
F-box	Gh_D02G133900	undirected	0.188939
F-box	Gh_D03G019400	undirected	0.201287
F-box	Gh_D03G041900	undirected	0.158159
F-box	Gh_D03G104800	undirected	0.248389
F-box	Gh_D03G149100	undirected	0.204333
F-box	Gh_D03G169500	undirected	0.193663
F-box	Gh_D04G034300	undirected	0.24007
F-box	Gh_D04G128800	undirected	0.198076
F-box	Gh_D05G013800	undirected	0.2553
F-box	Gh_D05G062800	undirected	0.125392
F-box	Gh_D05G080700	undirected	0.199016
F-box	Gh_D05G092900	undirected	0.178647
F-box	Gh_D05G094300	undirected	0.168953
F-box	Gh_D05G171600	undirected	0.257871
F-box	BBX21	undirected	0.133011
F-box	Gh_D05G224400	undirected	0.244207
F-box	Gh_D05G247600	undirected	0.209427
F-box	Gh_D05G380400	undirected	0.234874
F-box	Gh_D06G018500	undirected	0.2673
F-box	Gh_D06G019000	undirected	0.242875
F-box	Gh_D06G099400	undirected	0.235059
F-box	Gh_D06G106700	undirected	0.280689
F-box	Gh_D06G122000	undirected	0.329289
F-box	SMARCAL1	undirected	0.177632
F-box	Gh_D06G176000	undirected	0.191796
F-box	Gh_D06G237900	undirected	0.205506
F-box	Gh_D07G068800	undirected	0.167154
F-box	Gh_D07G073400	undirected	0.260331
F-box	Gh_D07G090000	undirected	0.174534
F-box	Gh_D07G155700	undirected	0.233365
F-box	FRS2	undirected	0.140716
F-box	Gh_D08G024500	undirected	0.211821
F-box	Gh_D08G168100	undirected	0.223177
F-box	Gh_D09G140800	undirected	0.190089
F-box	Gh_D09G141300	undirected	0.229752
F-box	Gh_D09G181000	undirected	0.275219
F-box	Gh_D09G206300	undirected	0.14894
F-box	Gh_D10G046500	undirected	0.282266
F-box	Gh_D10G068500	undirected	0.162925
F-box	Gh_D10G222800	undirected	0.173292
F-box	Gh_D10G261100	undirected	0.152683
F-box	Gh_D11G034700	undirected	0.252372
F-box	Gh_D11G046000	undirected	0.261191
F-box	Gh_D11G052900	undirected	0.19244
F-box	Gh_D11G077000	undirected	0.225629
F-box	Gh_D11G095600	undirected	0.230089
F-box	Gh_D11G111300	undirected	0.166589
F-box	Gh_D11G116700	undirected	0.135127
F-box	Gh_D11G121100	undirected	0.251006
F-box	Gh_D11G138600	undirected	0.277505
F-box	Gh_D11G169100	undirected	0.183155
F-box	Gh_D11G171900	undirected	0.224768
F-box	Gh_D11G197000	undirected	0.272487
F-box	Gh_D11G216400	undirected	0.259265
F-box	Gh_D11G259800	undirected	0.286707
F-box	Gh_D11G273700	undirected	0.279373
F-box	Gh_D11G309300	undirected	0.145186
F-box	Gh_D11G318600	undirected	0.263804
F-box	Gh_D11G321200	undirected	0.258047
F-box	Gh_D12G026000	undirected	0.147741
F-box	Gh_D12G113200	undirected	0.196395
F-box	Gh_D12G229200	undirected	0.273971
F-box	Gh_D13G002900	undirected	0.231231
F-box	Gh_D13G025300	undirected	0.20558
F-box	Gh_D13G034800	undirected	0.242642
F-box	Gh_D13G085000	undirected	0.182854
F-box	Gh_D13G089100	undirected	0.252486
F-box	Gh_D13G119600	undirected	0.285772
F-box	Gh_D13G122500	undirected	0.198661
F-box	Gh_D13G197800	undirected	0.206617
F-box	Gh_D13G219900	undirected	0.180617
F-box	Gossypium_hirsutum_newGene_2171	undirected	0.170409
F-box	Gossypium_hirsutum_newGene_3481	undirected	0.141925
F-box	Gossypium_hirsutum_newGene_4399	undirected	0.139962
F-box	Gossypium_hirsutum_newGene_518	undirected	0.157098
F-box	Gossypium_hirsutum_newGene_9052	undirected	0.202373
Gh_A01G059200	F-box	undirected	0.277137
Gh_A01G094500	F-box	undirected	0.26539
Gh_A01G094600	F-box	undirected	0.294911
Gh_A01G102200	F-box	undirected	0.273383
Gh_A01G208500	F-box	undirected	0.210739
Gh_A02G006700	F-box	undirected	0.258828
Gh_A02G066100	F-box	undirected	0.192574
Gh_A02G157900	F-box	undirected	0.17583
Gh_A02G168800	F-box	undirected	0.150412
Gh_A02G184100	F-box	undirected	0.17908
Gh_A03G027000	F-box	undirected	0.176967
Gh_A03G047600	F-box	undirected	0.166752
Gh_A03G240200	F-box	undirected	0.245368
Gh_A04G023200	F-box	undirected	0.183085
SMARCAL1	FRS2	undirected	0.15264
BBX21	FRS2	undirected	0.180504
F-box	FRS2	undirected	0.140716
Gh_A01G059200	FRS2	undirected	0.218649
Gh_A01G094500	FRS2	undirected	0.235497
Gh_A01G094600	FRS2	undirected	0.248185
Gh_A01G102200	FRS2	undirected	0.273157
Gh_A01G208500	FRS2	undirected	0.24622
Gh_A02G006700	FRS2	undirected	0.192792
Gh_A02G066100	FRS2	undirected	0.128409
Gh_A02G157900	FRS2	undirected	0.161218
Gh_A02G168800	FRS2	undirected	0.124636
Gh_A02G184100	FRS2	undirected	0.103844
Gh_A03G027000	FRS2	undirected	0.144587
Gh_A03G047600	FRS2	undirected	0.124942
Gh_A03G240200	FRS2	undirected	0.208976
Gh_A04G023200	FRS2	undirected	0.187394
Gh_A04G082300	FRS2	undirected	0.175538
Gh_A05G047800	FRS2	undirected	0.25082
Gh_A05G066900	FRS2	undirected	0.240259
Gh_A05G154900	FRS2	undirected	0.261891
Gh_A05G155000	FRS2	undirected	0.189941
Gh_A05G169500	FRS2	undirected	0.137037
Gh_A05G194200	FRS2	undirected	0.219119
Gh_A05G207700	FRS2	undirected	0.218119
Gh_A05G231400	FRS2	undirected	0.19648
Gh_A05G390800	FRS2	undirected	0.200139
Gh_A06G012900	FRS2	undirected	0.194319
Gh_A06G019200	FRS2	undirected	0.263108
Gh_A06G132100	FRS2	undirected	0.216216
Gh_A06G201600	FRS2	undirected	0.172895
Gh_A06G202600	FRS2	undirected	0.186045
Gh_A06G219800	FRS2	undirected	0.134757
Gh_A07G010300	FRS2	undirected	0.21577
Gh_A07G039900	FRS2	undirected	0.259271
Gh_A07G040800	FRS2	undirected	0.153718
Gh_A07G091400	FRS2	undirected	0.132896
Gh_A07G153500	FRS2	undirected	0.128478
Gh_A07G183400	FRS2	undirected	0.174938
Gh_A07G208000	FRS2	undirected	0.255676
Gh_A08G169500	FRS2	undirected	0.237058
Gh_A08G286700	FRS2	undirected	0.150169
Gh_A09G001400	FRS2	undirected	0.147757
Gh_A09G150200	FRS2	undirected	0.224189
Gh_A09G153500	FRS2	undirected	0.260864
Gh_A09G189600	FRS2	undirected	0.188466
Gh_A09G207100	FRS2	undirected	0.140445
Gh_A09G273400	FRS2	undirected	0.201641
Gh_A10G001700	FRS2	undirected	0.204449
Gh_A10G077100	FRS2	undirected	0.234462
Gh_A11G034600	FRS2	undirected	0.254752
Gh_A11G110800	FRS2	undirected	0.170074
Gh_A11G128900	FRS2	undirected	0.194767
Gh_A11G137700	FRS2	undirected	0.248381
Gh_A11G274900	FRS2	undirected	0.184312
Gh_A11G277900	FRS2	undirected	0.193571
Gh_A11G305300	FRS2	undirected	0.24527
Gh_A11G317400	FRS2	undirected	0.273389
Gh_A12G026900	FRS2	undirected	0.190545
Gh_A12G231100	FRS2	undirected	0.175851
Gh_A12G234900	FRS2	undirected	0.196947
Gh_A12G254300	FRS2	undirected	0.213815
Gh_A12G263200	FRS2	undirected	0.23718
Gh_A13G033400	FRS2	undirected	0.217611
Gh_A13G160700	FRS2	undirected	0.240832
Gh_A13G183600	FRS2	undirected	0.199158
Gh_A13G195100	FRS2	undirected	0.202187
Gh_D01G025700	FRS2	undirected	0.111503
Gh_D01G052900	FRS2	undirected	0.186434
Gh_D01G090100	FRS2	undirected	0.210804
Gh_D01G090200	FRS2	undirected	0.279687
Gh_D01G207400	FRS2	undirected	0.22
Gh_D02G007300	FRS2	undirected	0.230013
Gh_D02G057400	FRS2	undirected	0.142443
Gh_D02G070200	FRS2	undirected	0.224363
Gh_D02G122700	FRS2	undirected	0.153981
Gh_D02G133900	FRS2	undirected	0.179859
Gh_D03G019400	FRS2	undirected	0.137251
Gh_D03G041900	FRS2	undirected	0.170869
Gh_D03G104800	FRS2	undirected	0.254145
Gh_D03G149100	FRS2	undirected	0.204656
Gh_D03G169500	FRS2	undirected	0.1589
Gh_D04G034300	FRS2	undirected	0.16883
Gh_D04G128800	FRS2	undirected	0.13463
Gh_D05G013800	FRS2	undirected	0.211079
Gh_D05G062800	FRS2	undirected	0.175872
Gh_D05G080700	FRS2	undirected	0.194603
Gh_D05G092900	FRS2	undirected	0.195376
Gh_D05G094300	FRS2	undirected	0.147958
Gh_D05G171600	FRS2	undirected	0.254824
Gh_D05G224400	FRS2	undirected	0.248343
Gh_D05G247600	FRS2	undirected	0.209907
Gh_D05G380400	FRS2	undirected	0.248097
Gh_D06G018500	FRS2	undirected	0.285194
Gh_D06G019000	FRS2	undirected	0.237554
Gh_D06G099400	FRS2	undirected	0.207215
Gh_D06G106700	FRS2	undirected	0.255951
Gh_D06G122000	FRS2	undirected	0.259364
Gh_D06G176000	FRS2	undirected	0.126302
Gh_D06G237900	FRS2	undirected	0.203449
Gh_D07G068800	FRS2	undirected	0.189603
Gh_D07G073400	FRS2	undirected	0.230191
Gh_D07G090000	FRS2	undirected	0.128652
Gh_D07G155700	FRS2	undirected	0.183196
BBX21	SMARCAL1	undirected	0.143131
F-box	SMARCAL1	undirected	0.177632
Gh_A01G059200	SMARCAL1	undirected	0.293487
Gh_A01G094500	SMARCAL1	undirected	0.2392
Gh_A01G094600	SMARCAL1	undirected	0.274229
Gh_A01G102200	SMARCAL1	undirected	0.256975
Gh_A01G208500	SMARCAL1	undirected	0.201106
Gh_A02G006700	SMARCAL1	undirected	0.265829
Gh_A02G066100	SMARCAL1	undirected	0.164269
Gh_A02G157900	SMARCAL1	undirected	0.199321
Gh_A02G168800	SMARCAL1	undirected	0.200833
Gh_A02G184100	SMARCAL1	undirected	0.171065
Gh_A03G027000	SMARCAL1	undirected	0.209308
Gh_A03G047600	SMARCAL1	undirected	0.184389
Gh_A03G240200	SMARCAL1	undirected	0.253945
Gh_A04G023200	SMARCAL1	undirected	0.19249
Gh_A04G082300	SMARCAL1	undirected	0.194892
Gh_A05G047800	SMARCAL1	undirected	0.201442
Gh_A05G066900	SMARCAL1	undirected	0.247597
Gh_A05G154900	SMARCAL1	undirected	0.240709
Gh_A05G155000	SMARCAL1	undirected	0.185407
Gh_A05G169500	SMARCAL1	undirected	0.196887
Gh_A05G194200	SMARCAL1	undirected	0.278812
Gh_A05G207700	SMARCAL1	undirected	0.192609
Gh_A05G231400	SMARCAL1	undirected	0.203571
Gh_A05G390800	SMARCAL1	undirected	0.259253
Gh_A06G012900	SMARCAL1	undirected	0.238562
Gh_A06G019200	SMARCAL1	undirected	0.314862
Gh_A06G132100	SMARCAL1	undirected	0.259305
Gh_A06G201600	SMARCAL1	undirected	0.184663
Gh_A06G202600	SMARCAL1	undirected	0.219069
Gh_A06G219800	SMARCAL1	undirected	0.187372
Gh_A07G010300	SMARCAL1	undirected	0.259232
Gh_A07G039900	SMARCAL1	undirected	0.249043
Gh_A07G040800	SMARCAL1	undirected	0.151174
Gh_A07G091400	SMARCAL1	undirected	0.209659
Gh_A07G153500	SMARCAL1	undirected	0.202987
Gh_A07G183400	SMARCAL1	undirected	0.169407
Gh_A07G208000	SMARCAL1	undirected	0.25734
Gh_A08G169500	SMARCAL1	undirected	0.282876
Gh_A08G286700	SMARCAL1	undirected	0.187644
Gh_A09G001400	SMARCAL1	undirected	0.174661
Gh_A09G150200	SMARCAL1	undirected	0.204935
Gh_A09G153500	SMARCAL1	undirected	0.197795
Gh_A09G189600	SMARCAL1	undirected	0.252694
Gh_A09G207100	SMARCAL1	undirected	0.176932
Gh_A09G273400	SMARCAL1	undirected	0.19208
Gh_A10G001700	SMARCAL1	undirected	0.229923
Gh_A10G077100	SMARCAL1	undirected	0.264109
Gh_A11G034600	SMARCAL1	undirected	0.260986
Gh_A11G110800	SMARCAL1	undirected	0.226735
Gh_A11G128900	SMARCAL1	undirected	0.213265
Gh_A11G137700	SMARCAL1	undirected	0.272332
Gh_A11G274900	SMARCAL1	undirected	0.180741
Gh_A11G277900	SMARCAL1	undirected	0.226619
Gh_A11G305300	SMARCAL1	undirected	0.185378
Gh_A11G317400	SMARCAL1	undirected	0.283599
Gh_A12G026900	SMARCAL1	undirected	0.182889
Gh_A12G231100	SMARCAL1	undirected	0.182511
Gh_A12G234900	SMARCAL1	undirected	0.282899
Gh_A12G254300	SMARCAL1	undirected	0.284978
Gh_A12G263200	SMARCAL1	undirected	0.216076
Gh_A13G033400	SMARCAL1	undirected	0.27288
Gh_A13G160700	SMARCAL1	undirected	0.246857
Gh_A13G183600	SMARCAL1	undirected	0.217124
Gh_A13G195100	SMARCAL1	undirected	0.210239
Gh_D01G025700	SMARCAL1	undirected	0.173015
Gh_D01G052900	SMARCAL1	undirected	0.252433
Gh_D01G090100	SMARCAL1	undirected	0.223023
Gh_D01G090200	SMARCAL1	undirected	0.294346
Gh_D01G207400	SMARCAL1	undirected	0.223762
Gh_D02G007300	SMARCAL1	undirected	0.270022
Gh_D02G057400	SMARCAL1	undirected	0.184969
Gh_D02G070200	SMARCAL1	undirected	0.226135
Gh_D02G122700	SMARCAL1	undirected	0.179795
Gh_D02G133900	SMARCAL1	undirected	0.196571
Gh_D03G019400	SMARCAL1	undirected	0.190304
Gh_D03G041900	SMARCAL1	undirected	0.162468
Gh_D03G104800	SMARCAL1	undirected	0.241942
Gh_D03G149100	SMARCAL1	undirected	0.223353
Gh_D03G169500	SMARCAL1	undirected	0.219061
Gh_D04G034300	SMARCAL1	undirected	0.238619
Gh_D04G128800	SMARCAL1	undirected	0.200267
Gh_D05G013800	SMARCAL1	undirected	0.251934
Gh_D05G062800	SMARCAL1	undirected	0.147594
Gh_D05G080700	SMARCAL1	undirected	0.245505
Gh_D05G092900	SMARCAL1	undirected	0.18741
Gh_D05G094300	SMARCAL1	undirected	0.207269
Gh_D05G171600	SMARCAL1	undirected	0.261282
Gh_D05G224400	SMARCAL1	undirected	0.26362
Gh_D05G247600	SMARCAL1	undirected	0.195989
Gh_D05G380400	SMARCAL1	undirected	0.228035
Gh_D06G018500	SMARCAL1	undirected	0.269549
Gh_D06G019000	SMARCAL1	undirected	0.243058
Gh_D06G099400	SMARCAL1	undirected	0.227871
Gh_D06G106700	SMARCAL1	undirected	0.274822
Gh_D06G122000	SMARCAL1	undirected	0.319727
F-box	BBX21	undirected	0.133011
Gh_A01G059200	BBX21	undirected	0.227298
Gh_A01G094500	BBX21	undirected	0.251846
Gh_A01G094600	BBX21	undirected	0.254821
Gh_A01G102200	BBX21	undirected	0.284695
Gh_A01G208500	BBX21	undirected	0.252411
Gh_A02G006700	BBX21	undirected	0.199561
Gh_A02G066100	BBX21	undirected	0.141778
Gh_A02G157900	BBX21	undirected	0.160176
Gh_A02G168800	BBX21	undirected	0.144131
Gh_A02G184100	BBX21	undirected	0.123127
Gh_A03G027000	BBX21	undirected	0.153867
Gh_A03G047600	BBX21	undirected	0.130729
Gh_A03G240200	BBX21	undirected	0.216825
Gh_A04G023200	BBX21	undirected	0.175276
Gh_A04G082300	BBX21	undirected	0.177344
Gh_A05G047800	BBX21	undirected	0.263491
Gh_A05G066900	BBX21	undirected	0.258133
Gh_A05G154900	BBX21	undirected	0.277979
Gh_A05G155000	BBX21	undirected	0.183222
Gh_A05G169500	BBX21	undirected	0.153598
Gh_A05G194200	BBX21	undirected	0.220952
Gh_A05G207700	BBX21	undirected	0.231614
Gh_A05G231400	BBX21	undirected	0.202283
Gh_A05G390800	BBX21	undirected	0.208096
Gh_A06G012900	BBX21	undirected	0.200428
Gh_A06G019200	BBX21	undirected	0.268626
Gh_A06G132100	BBX21	undirected	0.219954
Gh_A06G201600	BBX21	undirected	0.182479
Gh_A06G202600	BBX21	undirected	0.181672
Gh_A06G219800	BBX21	undirected	0.148476
Gh_A07G010300	BBX21	undirected	0.21607
Gh_A07G039900	BBX21	undirected	0.266601
Gh_A07G040800	BBX21	undirected	0.189338
Gh_A07G091400	BBX21	undirected	0.123147
Gh_A07G153500	BBX21	undirected	0.120822
Gh_A07G183400	BBX21	undirected	0.175062
Gh_A07G208000	BBX21	undirected	0.277364
Gh_A08G169500	BBX21	undirected	0.246567
Gh_A08G286700	BBX21	undirected	0.183176
Gh_A09G001400	BBX21	undirected	0.141877
Gh_A09G150200	BBX21	undirected	0.226171
Gh_A09G153500	BBX21	undirected	0.277989
Gh_A09G189600	BBX21	undirected	0.182421
Gh_A09G207100	BBX21	undirected	0.144613
Gh_A09G273400	BBX21	undirected	0.207334
Gh_A10G001700	BBX21	undirected	0.222882
Gh_A10G077100	BBX21	undirected	0.241408
Gh_A11G034600	BBX21	undirected	0.265203
Gh_A11G110800	BBX21	undirected	0.173536
Gh_A11G128900	BBX21	undirected	0.194781
Gh_A11G137700	BBX21	undirected	0.2621
Gh_A11G274900	BBX21	undirected	0.167394
Gh_A11G277900	BBX21	undirected	0.179521
Gh_A11G305300	BBX21	undirected	0.269412
Gh_A11G317400	BBX21	undirected	0.294823
Gh_A12G026900	BBX21	undirected	0.208913
Gh_A12G231100	BBX21	undirected	0.182701
Gh_A12G234900	BBX21	undirected	0.20277
Gh_A12G254300	BBX21	undirected	0.219069
Gh_A12G263200	BBX21	undirected	0.247672
Gh_A13G033400	BBX21	undirected	0.229755
Gh_A13G160700	BBX21	undirected	0.265303
Gh_A13G183600	BBX21	undirected	0.186802
Gh_A13G195100	BBX21	undirected	0.190848
Gh_D01G025700	BBX21	undirected	0.126527
Gh_D01G052900	BBX21	undirected	0.193955
Gh_D01G090100	BBX21	undirected	0.221875
Gh_D01G090200	BBX21	undirected	0.288607
Gh_D01G207400	BBX21	undirected	0.220029
Gh_D02G007300	BBX21	undirected	0.246072
Gh_D02G057400	BBX21	undirected	0.178698
Gh_D02G070200	BBX21	undirected	0.221828
Gh_D02G122700	BBX21	undirected	0.143293
Gh_D02G133900	BBX21	undirected	0.169628
Gh_D03G019400	BBX21	undirected	0.139048
Gh_D03G041900	BBX21	undirected	0.179021
Gh_D03G104800	BBX21	undirected	0.259165
Gh_D03G149100	BBX21	undirected	0.198591
Gh_D03G169500	BBX21	undirected	0.16513
Gh_D04G034300	BBX21	undirected	0.174472
Gh_D04G128800	BBX21	undirected	0.130236
Gh_D05G013800	BBX21	undirected	0.2088
Gh_D05G062800	BBX21	undirected	0.194985
Gh_D05G080700	BBX21	undirected	0.199193
Gh_D05G092900	BBX21	undirected	0.207227
Gh_D05G094300	BBX21	undirected	0.158547
Gh_D05G171600	BBX21	undirected	0.26715

## Sheet: D
Source	Target	Type	Weight			Gene ID	Gene Name	Description
Gh_A02G141500	MYB105	undirected	0.172912			Gh_D09G156400	MYB36	Transcription factor MYB36
Gh_A05G127000	MYB105	undirected	0.19531			Gh_A13G181900	MYB105	Transcription factor MYB105
Gh_A05G365600	MYB105	undirected	0.17469			Gh_A07G196600	BZIP43	Basic leucine zipper 43
Gh_A06G198300	MYB105	undirected	0.1014			Gh_A01G011000	PLT5	Polyol transporter 5
Gh_A06G235900	MYB105	undirected	0.125679			Gh_A01G037800	VQ1	VQ motif-containing protein 1
Gh_A07G115100	MYB105	undirected	0.116798			Gh_A01G074000	NA	Putative anthocyanidin reductase
Gh_A07G234500	MYB105	undirected	0.11531			Gh_A01G228900	NA	Secoisolariciresinol dehydrogenase (Fragment)
Gh_A10G035400	MYB105	undirected	0.111366			Gh_A01G229000	NA	Secoisolariciresinol dehydrogenase (Fragment)
Gh_A11G079100	MYB105	undirected	0.111476			Gh_A01G248300	Ankrd11	Ankyrin repeat domain-containing protein 11
Gh_A11G085200	MYB105	undirected	0.186197			Gh_A02G044900	At1g06620	1-aminocyclopropane-1-carboxylate oxidase homolog 1
Gh_A11G347900	MYB105	undirected	0.102229			Gh_A02G107900	PIX13	Probable serine/threonine-protein kinase PIX13
Gh_A13G131300	MYB105	undirected	0.106267			Gh_A02G141500	CWINV1	Beta-fructofuranosidase, insoluble isoenzyme CWINV1
Gh_A02G044900	MYB36	undirected	0.115345			Gh_A03G071600	rsc5	Random slug protein 5
Gh_A02G141500	MYB36	undirected	0.152393			Gh_A03G140500	At1g03400	1-aminocyclopropane-1-carboxylate oxidase homolog 4
Gh_A05G127000	MYB36	undirected	0.187804			Gh_A03G152200	ABCC3	ABC transporter C family member 3
Gh_A05G365600	MYB36	undirected	0.213096			Gh_A03G208200	DUR3	Urea-proton symporter DUR3
Gh_A06G235900	MYB36	undirected	0.148092			Gh_A04G013700	SUMO2	Small ubiquitin-related modifier 2
Gh_A07G115100	MYB36	undirected	0.137953			Gh_A04G105500	GSTU8	Glutathione S-transferase U8
Gh_A07G234500	MYB36	undirected	0.151715			Gh_A04G116800	GSTU18	Glutathione S-transferase U18
Gh_A10G035400	MYB36	undirected	0.145826			Gh_A05G024500	RPS2	Disease resistance protein RPS2
Gh_A11G085200	MYB36	undirected	0.202718			Gh_A05G127000	GLIP1	GDSL esterase/lipase 1
Gh_A13G131300	MYB36	undirected	0.175018			Gh_A05G205000	AED3	Aspartyl protease AED3
Gh_A13G246400	MYB36	undirected	0.142984			Gh_A05G226900	GLTP3	Glycolipid transfer protein 3
Gh_D02G233400	MYB36	undirected	0.114838			Gh_A05G365600	DOX1	Alpha-dioxygenase 1
Gh_D03G061500	MYB36	undirected	0.134542			Gh_A05G390500	NA	NA
Gh_D03G194300	MYB36	undirected	0.194477			Gh_A06G131500	LAC9	Putative laccase-9
Gh_D04G059300	MYB36	undirected	0.251701			Gh_A06G186400	At4g27290	G-type lectin S-receptor-like serine/threonine-protein kinase At4g27290
Gh_D04G059400	MYB36	undirected	0.241085			Gh_A06G198300	MLO6	MLO-like protein 6
Gh_D06G125400	MYB36	undirected	0.101155			Gh_A06G235900	NA	NA
Gh_D07G055400	MYB36	undirected	0.182112			Gh_A07G017300	SS	Sucrose synthase
Gh_D09G100800	MYB36	undirected	0.141904			Gh_A07G115100	ASN1	Asparagine synthetase [glutamine-hydrolyzing] 1
Gh_A01G011000	BZIP43	undirected	0.136475			Gh_A07G231500	PCMP-H91	Pentatricopeptide repeat-containing protein At5g15340, mitochondrial
Gh_A01G037800	BZIP43	undirected	0.129242			Gh_A07G234500	GAUT6	Probable galacturonosyltransferase 6
Gh_A01G248300	BZIP43	undirected	0.169993			Gh_A08G098100	CjBAp12	EG45-like domain containing protein
Gh_A04G105500	BZIP43	undirected	0.170977			Gh_A08G240900	GSH3	Probable glutamate dehydrogenase 3
Gh_A05G205000	BZIP43	undirected	0.119099			Gh_A09G094100	NA	Peroxisomal (S)-2-hydroxy-acid oxidase
Gh_A06G131500	BZIP43	undirected	0.115266			Gh_A09G125100	PBL3	Probable serine/threonine-protein kinase PBL3
Gh_A06G235900	BZIP43	undirected	0.107662			Gh_A09G194100	LRK10L-2.8	LEAF RUST 10 DISEASE-RESISTANCE LOCUS RECEPTOR-LIKE PROTEIN KINASE-like 2.8
Gh_A07G017300	BZIP43	undirected	0.1022			Gh_A10G007700	CRK10	Cysteine-rich receptor-like protein kinase 10
Gh_A07G115100	BZIP43	undirected	0.123717			Gh_A10G019000	NA	Desiccation-related protein PCC3-06
MYB36	Gh_D12G175000	undirected	0.161895			Gh_A10G035400	ALIS2	Putative ALA-interacting subunit 2
MYB36	Gh_D13G049600	undirected	0.134978			Gh_A10G115900	DHAD	Dihydroxy-acid dehydratase, chloroplastic
MYB36	Gh_D13G195900	undirected	0.221138			Gh_A10G173300	BXL1	Beta-D-xylosidase 1
MYB105	Gh_A13G193000	undirected	0.124014			Gh_A10G200400	UBP12	Ubiquitin carboxyl-terminal hydrolase 12
MYB105	Gh_D02G233400	undirected	0.112405			Gh_A10G201700	MNR1	(+)-neomenthol dehydrogenase
MYB105	Gh_D03G061500	undirected	0.102068			Gh_A11G009100	CBDAS2	Cannabidiolic acid synthase-like 1
MYB105	Gh_D04G059300	undirected	0.112301			Gh_A11G069900	MPC1	Mitochondrial pyruvate carrier 1
MYB105	Gh_D04G059400	undirected	0.10611			Gh_A11G079100	TKPR1	Tetraketide alpha-pyrone reductase 1
MYB105	Gh_D07G055400	undirected	0.167918			Gh_A11G085200	At1g63370	Flavin-containing monooxygenase FMO GS-OX-like 5
MYB105	Gh_D11G056100	undirected	0.102016			Gh_A11G237400	CYP81E8	Cytochrome P450 81E8
MYB105	Gh_D12G175000	undirected	0.127851			Gh_A11G322900	GLCAT14B	Beta-glucuronosyltransferase GlcAT14B
MYB105	Gh_D13G049600	undirected	0.19725			Gh_A11G347900	NCS2	S-norcoclaurine synthase 2
MYB105	Gh_D13G195900	undirected	0.222218			Gh_A12G209300	SOT16	Cytosolic sulfotransferase 16
MYB105	Gh_D13G267000	undirected	0.121802			Gh_A12G266800	COMT1	Caffeic acid 3-O-methyltransferase
MYB105	Gh_D13G267100	undirected	0.165823			Gh_A12G266900	NA	Caffeic acid 3-O-methyltransferase
BZIP43	Gh_A10G019000	undirected	0.12259			Gh_A12G267000	COMT1	Caffeic acid 3-O-methyltransferase
BZIP43	Gh_A10G173300	undirected	0.108187			Gh_A13G131300	WSD1	O-acyltransferase WSD1
BZIP43	Gh_A13G246400	undirected	0.108079			Gh_A13G193000	NA	Pathogenesis-related protein P2
BZIP43	Gh_D01G010400	undirected	0.177687			Gh_A13G246400	ephA	Epoxide hydrolase A
BZIP43	Gh_D01G150000	undirected	0.123786			Gh_Contig00027G000300	MIK2	MDIS1-interacting receptor like kinase 2
BZIP43	Gh_D03G061500	undirected	0.114737			Gh_Contig00738G000100	CjBAp12	EG45-like domain containing protein
BZIP43	Gh_D04G059300	undirected	0.112279			Gh_Contig01109G001800	ABCA7	ABC transporter A family member 7
BZIP43	Gh_D04G059400	undirected	0.106364			Gh_D01G010400	PLT5	Polyol transporter 5
BZIP43	Gh_D07G111900	undirected	0.117006			Gh_D01G023200	ECI3	Enoyl-CoA delta isomerase 3
BZIP43	Gh_D08G225100	undirected	0.140522			Gh_D01G035300	VQ1	VQ motif-containing protein 1
BZIP43	Gh_D08G232200	undirected	0.102195			Gh_D01G150000	At2g36630	Sulfite exporter TauE/SafE family protein 4
BZIP43	Gh_D12G175000	undirected	0.118866			Gh_D01G224000	NA	Secoisolariciresinol dehydrogenase (Fragment)
BZIP43	Gossypium_hirsutum_newGene_12262	undirected	0.154045			Gh_D01G224100	NA	Secoisolariciresinol dehydrogenase (Fragment)
BZIP43	Gossypium_hirsutum_newGene_6396	undirected	0.140755			Gh_D01G242500	Ankrd11	Ankyrin repeat domain-containing protein 11
						Gh_D02G233400	WSD1	O-acyltransferase WSD1
						Gh_D03G061500	CWINV1	Beta-fructofuranosidase, insoluble isoenzyme CWINV1
						Gh_D03G098600	Mafg	Transcription factor MafG
						Gh_D03G170100	tlp	Thaumatin-like protein
						Gh_D03G194300	NA	11S globulin subunit beta
						Gh_D04G059300	DOX1	Alpha-dioxygenase 1
						Gh_D04G059400	DOX1	Alpha-dioxygenase 1
						Gh_D04G096200	GLR2.7	Glutamate receptor 2.7
						Gh_D04G124500	UGT73C5	UDP-glycosyltransferase 73C5
						Gh_D04G135500	EXO70A1	Exocyst complex component EXO70A1
						Gh_D04G177100	Lpcat3	Lysophospholipid acyltransferase 5
						Gh_D05G030800	SLC25A16	Graves disease carrier protein
						Gh_D05G032900	RPS2	Disease resistance protein RPS2
						Gh_D05G132000	CHUP1	Protein CHUP1, chloroplastic
						Gh_D05G142700	RNF144A	E3 ubiquitin-protein ligase RNF144A
						Gh_D05G241400	SKP2A	F-box protein SKP2A
						Gh_D06G038000	NA	NA
						Gh_D06G056000	CHIT1B	Basic endochitinase
						Gh_D06G125400	LAC9	Putative laccase-9
						Gh_D07G055400	PDR1	Pleiotropic drug resistance protein 1
						Gh_D07G111900	ASN1	Asparagine synthetase [glutamine-hydrolyzing] 1
						Gh_D08G071600	BH0283	Uncharacterized isomerase BH0283
						Gh_D08G198200	SGR1	Protein STAY-GREEN 1, chloroplastic
						Gh_D08G225100	GPAT3	Probable glycerol-3-phosphate acyltransferase 3
						Gh_D08G232200	GSH3	Probable glutamate dehydrogenase 3
						Gh_D09G058800	RHG1A	Probable E3 ubiquitin-protein ligase RHG1A
						Gh_D09G100800	ASN1	Asparagine synthetase [glutamine-hydrolyzing] 1
						Gh_D09G130900	FLOT1	Flotillin-like protein 1
						Gh_D09G154800	NA	Thaumatin-like protein 1
						Gh_D09G187700	LRK10L-2.1	LEAF RUST 10 DISEASE-RESISTANCE LOCUS RECEPTOR-LIKE PROTEIN KINASE-like 2.1
						Gh_D09G190100	At5g51830	Probable fructokinase-7
						Gh_D09G217900	NA	Cytochrome P450 CYP736A12
						Gh_D09G224100	EP3	Endochitinase EP3
						Gh_D10G017300	CRK10	Cysteine-rich receptor-like protein kinase 10
						Gh_D10G193900	STH-2	Pathogenesis-related protein STH-2
						Gh_D10G194400	BXL1	Beta-D-xylosidase 1
						Gh_D10G207400	WAKL22	Wall-associated receptor kinase-like 22
						Gh_D10G257900	At4g27190	Disease resistance protein At4g27190
						Gh_D11G021500	GSTT1	Glutathione S-transferase T1
						Gh_D11G056100	NA	NA
						Gh_D11G069800	MPC1	Mitochondrial pyruvate carrier 1
						Gh_D11G213300	CAD7	Probable cinnamyl alcohol dehydrogenase 7/8
						Gh_D11G285100	AKR1	Probable aldo-keto reductase 1
						Gh_D12G175000	NA	NA
						Gh_D12G261400	COMT1	Caffeic acid 3-O-methyltransferase
						Gh_D12G281100	ZFWD2	Zinc finger CCCH domain-containing protein 63
						Gh_D13G049600	SP140	Nuclear body protein SP140
						Gh_D13G195900	NA	Pathogenesis-related protein P2
						Gh_D13G267000	ATL73	RING-H2 finger protein ATL73
						Gh_D13G267100	NA	Non-specific lipid-transfer protein
