# Supplementary material for: Comprehensive Evaluation and Transcriptome Analysis Reveal the Salt Tolerance Mechanism in Semi-Wild Cotton (Gossypium purpurascens)
Source: Int J Mol Sci. 2023 Aug 16;24(16):12853. doi: 10.3390/ijms241612853 (PMC10454576; doi:10.3390/ijms241612853)
Supplement: Supplementary file 1 [file ijms-24-12853-s001.zip › Table S6.xlsx]

## Sheet: 18 genes
GeneID	NO.	GP2-00-1_FPKM	GP2-00-2_FPKM	GP2-00-3_FPKM	GP2-05-1_FPKM	GP2-05-2_FPKM	GP2-05-3_FPKM	GP2-3-1_FPKM	GP2-3-2_FPKM	GP2-3-3_FPKM	GP2-12-1_FPKM	GP2-12-2_FPKM	GP2-12-3_FPKM	GP2-24-1_FPKM	GP2-24-2_FPKM	NY2-00-1_FPKM	NY2-00-2_FPKM	NY2-00-3_FPKM	NY2-05-1_FPKM	NY2-05-2_FPKM	NY2-05-3_FPKM	NY2-3-1_FPKM	NY2-3-2_FPKM	NY2-3-3_FPKM	NY2-12-1_FPKM	NY2-12-2_FPKM	NY2-12-3_FPKM	NY2-24-1_FPKM	NY2-24-2_FPKM	NY2-24-3_FPKM	GP2-00_vs_GP2-05_DESeq2_FDR	GP2-00_vs_GP2-05_DESeq2_log2FC	GP2-00_vs_GP2-05_DESeq2_(FDR_0.05_FC_2)_regulated	GP2-00_vs_GP2-3_DESeq2_FDR	GP2-00_vs_GP2-3_DESeq2_log2FC	GP2-00_vs_GP2-3_DESeq2_(FDR_0.05_FC_2)_regulated	GP2-00_vs_GP2-12_DESeq2_FDR	GP2-00_vs_GP2-12_DESeq2_log2FC	GP2-00_vs_GP2-12_DESeq2_(FDR_0.05_FC_2)_regulated	GP2-00_vs_GP2-24_DESeq2_FDR	GP2-00_vs_GP2-24_DESeq2_log2FC	GP2-00_vs_GP2-24_DESeq2_(FDR_0.05_FC_2)_regulated	NY2-00_vs_NY2-05_DESeq2_FDR	NY2-00_vs_NY2-05_DESeq2_log2FC	NY2-00_vs_NY2-05_DESeq2_(FDR_0.05_FC_2)_regulated	NY2-00_vs_NY2-3_DESeq2_FDR	NY2-00_vs_NY2-3_DESeq2_log2FC	NY2-00_vs_NY2-3_DESeq2_(FDR_0.05_FC_2)_regulated	NY2-00_vs_NY2-12_DESeq2_FDR
Gh_D11G074900	G01	16.8131	16.6416	20.104	7.37883	6.30463	7.21149	5.83864	9.82296	6.39166	12.5972	13.977	16.1728	22.3446	23.1434	4.2272	5.08551	3.67212	12.8238	11.9166	12.242	5.27839	6.5016	4.19902	9.59398	11.064	10.8006	25.1463	24.9801	21.428	5.88061e-11	-1.3131	down	3.47132e-07	-1.31527	down	0.00093886	-0.692926	normal	0.00599558	0.656087	normal	7.63393e-27	1.46311	up	0.297216	0.238775	normal	2.50895e-06
Gh_D11G093500	G02	1.71834	2.10485	8.55863	1.74216	1.81826	3.32204	4.64795	4.3973	4.70599	3.28959	5.55899	7.42742	0	0.953164	6.44374	3.74422	4.47268	16.8666	17.242	25.4842	12.8531	13.1162	13.8223	9.26851	9.23926	21.3568	7.60832	10.756	9.92789	0.332435	-0.847461	normal	0.93858	0.0730325	normal	0.961281	-0.0414747	normal	0.0795805	-2.88366	normal	7.72745e-14	1.96511	up	2.5561e-07	1.36925	up	0.0395074
Gh_D05G134300	G03	33.5431	23.6447	24.7237	3.38427	5.22626	4.59227	1.49076	1.63192	0.835471	40.8796	46.6545	24.7564	28.436	46.3835	5.34088	7.6783	6.88364	2.38773	2.76144	3.10751	3.63227	3.33427	2.77724	37.2594	39.8822	34.1837	67.045	64.1552	40.7737	8.96045e-27	-2.5904	down	4.78204e-55	-4.40554	down	0.766218	0.111964	normal	0.0200153	0.748977	normal	1.84785e-14	-1.31367	down	6.60619e-10	-1.09517	down	2.2587e-44
Gh_A01G065700	G04	41.4746	21.5392	46.2285	29.592	16.247	15.3018	43.9428	31.1313	56.6532	32.8175	52.8394	45.7254	9.57859	10.9006	13.4778	10.81	11.6303	11.8486	11.6331	17.9183	16.6204	13.5495	16.4071	95.8907	57.6893	84.6325	20.8551	20.2153	16.5228	0.0804107	-0.807647	normal	0.640118	0.234376	normal	0.780208	-0.122985	normal	0.000569612	-1.55167	down	0.535619	0.153391	normal	0.0919037	0.31075	normal	1.14506e-27
Gh_A10G116000	G05	129.826	223.965	81.836	223.401	89.5341	135.885	172.004	179.252	108.387	36.5545	20.7284	93.3236	2.336	8.25877	218.105	184.528	171.379	505.881	456.058	368.001	224.206	208.771	272.776	191.081	115.507	169.448	37.1623	23.1178	43.2077	0.814558	0.137095	normal	0.84259	0.0892988	normal	0.000186237	-1.87718	down	6.75521e-15	-4.44665	down	2.10104e-19	1.15993	up	0.186601	0.240548	normal	8.38925e-06
Gh_A13G238300	G06	19.6109	14.3764	20.9865	8.21934	16.3695	15.3772	12.2643	11.3409	12.4281	3.05446	2.77688	2.0705	9.4907	7.07204	7.14178	8.55424	9.37932	10.6075	13.6219	12.5722	22.6748	31.1485	27.7271	3.65777	4.18574	3.977	12.8122	9.9956	12.3791	0.276829	-0.429365	normal	0.0164803	-0.642488	normal	6.57722e-25	-3.16422	down	0.0229352	-0.83929	normal	0.00523792	0.501404	normal	1.26397e-18	1.63692	up	4.26627e-20
Gh_D13G188300	G07	33.0155	19.8326	33.9482	66.0119	45.9068	58.9824	42.3652	38.5944	44.3409	17.6567	17.0151	16.0808	24.4544	25.5635	26.4636	20.5661	20.6304	42.7168	38.6331	39.0411	52.3465	74.916	84.8344	21.6531	21.1812	24.7385	61.0962	82.8904	61.5179	0.00184561	1.01115	up	0.132868	0.491662	normal	0.000156424	-1.15411	down	0.848163	0.0790416	normal	6.15725e-10	0.778399	normal	1.87102e-13	1.59135	up	0.000174184
Gh_D05G290300	G08	14.3759	14.7458	13.8594	6.64299	7.94769	7.27272	14.8648	17.8252	13.0498	54.3051	66.9723	71.3095	15.7856	20.0219	6.81539	5.06324	6.25367	8.11815	8.25277	9.65621	11.2884	14.0368	17.7946	52.6634	43.5869	50.7654	28.7295	36.945	33.9982	2.11123e-12	-0.924766	normal	0.717319	0.0652962	normal	4.65172e-32	1.80908	up	8.33588e-05	0.632528	normal	0.00900654	0.465896	normal	4.45544e-07	1.18909	up	9.49478e-52
Gh_D05G138200	G09	12.0274	14.575	10.3517	26.1394	28.631	29.3998	22.7073	22.1466	25.1562	22.9424	18.7478	15.4972	8.1933	10.0805	13.6698	11.6344	10.3541	28.4594	25.1675	26.4468	58.1486	47.8667	52.192	51.7584	63.3672	53.8191	22.5617	31.3537	21.5368	4.39294e-13	1.245	up	1.27689e-06	0.915572	normal	0.282098	0.296419	normal	0.675566	-0.106489	normal	5.60161e-11	1.11139	up	2.98206e-35	2.0818	up	2.0211e-23
Gh_D04G059400	G10	19.2208	7.60052	13.1439	23.6791	9.64869	8.54169	7.42585	6.23524	5.33166	12.0882	20.4191	13.1661	219.791	193.459	4.07051	2.34832	2.61037	7.85724	9.90419	10.7079	9.13903	16.1951	22.3198	4.8221	5.77003	10.0508	283.828	333.476	322.734	0.879139	0.10653	normal	0.00591024	-1.11717	down	0.712018	-0.17959	normal	2.65615e-20	4.24794	up	1.72551e-12	1.60237	up	1.7264e-11	2.34622	up	0.081292
Gh_A04G042800	G11	23.6275	24.072	47.7199	16.0122	19.1756	18.6388	9.99849	12.7307	9.93815	37.1881	31.1548	29.546	34.8516	41.1723	14.494	18.4724	24.4764	14.3913	15.7801	21.8011	58.2462	61.245	56.5975	68.802	58.3509	77.995	36.059	35.9962	35.3912	0.0399455	-0.801987	normal	1.74664e-05	-1.59752	down	0.390989	-0.347196	normal	0.259618	0.537376	normal	0.491593	-0.199429	normal	1.63703e-13	1.54511	up	8.767e-09
Gh_A10G166600	G12	49.54	25.3653	53.451	137.753	122.172	81.6085	319.508	366.461	468.885	538.967	375.74	289.351	359.563	400.004	32.3145	30.5816	31.6357	90.4854	92.4883	106.266	663.871	550.103	683.57	1365.12	1622.9	1530.78	819.292	1195.16	683.091	0.000208455	1.43786	up	2.02519e-18	3.12725	up	4.97504e-13	2.84779	up	1.02092e-15	3.42914	up	1.50028e-46	1.56123	up	8.13648e-214	4.2654	up	0
Gh_D10G188300	G13	9.88699	3.76766	11.6625	52.3862	26.633	23.2754	105.479	146.493	199.564	239.917	174.015	112.897	188.831	161.795	5.60514	4.52253	4.53695	14.6555	13.0794	22.7705	343.297	249.295	451.008	813.964	826.994	863.685	276.971	477.753	194.95	0.00013809	2.03244	up	2.05709e-18	4.09981	up	2.24098e-16	3.98466	up	5.57825e-17	4.65209	up	1.16751e-12	1.73121	up	1.29595e-146	6.09129	up	0
Gh_D08G067800	G14	31.6577	21.3372	27.3276	22.6301	16.6082	20.3825	28.2037	39.2977	34.1802	59.1591	57.4562	50.7096	46.7914	49.5998	12.3064	11.6696	9.85821	17.2527	17.2063	21.1447	35.016	30.7199	30.0004	31.0626	33.0707	33.6761	61.1668	68.7014	58.7944	0.183362	-0.386972	normal	0.276371	0.306604	normal	0.00686727	0.692764	normal	7.99239e-05	1.13847	up	2.62322e-07	0.669843	normal	1.85177e-35	1.43998	up	2.39484e-19
Gh_D11G199400	G15	25.729	18.7404	24.9407	36.8728	23.515	23.1959	34.0558	32.9155	36.8794	18.8999	20.0316	19.0788	8.41023	9.4415	11.3808	12.2945	11.1907	23.748	20.918	22.1323	40.247	38.0308	49.4452	27.2889	23.4176	22.0882	26.556	26.6306	27.9735	0.379249	0.309618	normal	0.0243016	0.551062	normal	0.0109246	-0.627396	normal	0.000253805	-1.0709	down	2.29268e-18	0.887095	normal	2.7199e-31	1.81595	up	4.35068e-05
Gh_A11G351700	G16	6.89211	8.18184	6.6392	4.90593	7.62082	4.87914	15.1613	12.1767	13.9947	13.5674	10.3587	14.126	0.559141	0.900468	7.45391	9.06573	8.89499	6.1565	6.87534	7.83036	14.5141	10.7894	10.2432	40.4126	32.3507	34.5636	3.27612	1.60918	2.55611	0.350625	-0.265207	normal	2.61668e-08	0.919605	normal	0.00330133	0.459462	normal	1.1358e-32	-2.99104	down	0.0516626	-0.332337	normal	0.0246501	0.416658	normal	1.74559e-29
Gh_D07G088800	G17	8.38355	5.93534	10.6142	7.99456	3.94429	8.20816	12.6777	9.85453	12.5768	6.14824	4.99384	6.44516	4.34681	4.75013	8.00309	5.75206	4.98435	8.98044	5.62954	8.24826	10.9792	10.7624	14.668	10.9243	8.5364	12.9012	16.8909	20.8778	19.1187	0.619656	-0.271469	normal	0.24343	0.457029	normal	0.0150552	-0.890484	normal	0.21402	-0.577838	normal	0.498808	0.232628	normal	0.00126628	0.9022	normal	0.490684
Gh_D08G133100	G18	27.8648	14.6397	30.7556	13.9078	14.7725	16.1145	19.9784	12.7831	24.7517	8.77823	8.10175	8.43411	9.67958	9.89651	9.81739	6.20168	8.13344	6.71538	5.2914	6.14514	22.7977	22.461	34.3363	16.8227	15.3465	17.6745	19.9012	25.2303	18.8357	0.070024	-0.685014	normal	0.436227	-0.382815	normal	5.06219e-08	-1.92369	down	0.0228219	-1.03612	down	0.0407358	-0.470785	normal	2.2677e-10	1.66	up	0.0354522
[truncated: 12 more columns]

## Sheet: qRT-PCR primers
Histone-F	TCAAGACTGATTTGCGTTTCCA
Histone-R	GCGCAAAGGTTGGTGTCTTC
Gh_D11G074900-F	GGATGGCTGAGCTTGGTTCT
Gh_D11G074900-R	AAACCCTTTTTGGCCTCCCA
Gh_D11G093500-F	GTCGTCCAGACCGACAGTTT
Gh_D11G093500-R	CCTACCACCTGAGGACTTGC
Gh_D05G134300-F	GTGCCCAAATTTCACGGAAGA
Gh_D05G134300-R	TGAAGCCGTCTCGTCATTG
Gh_A01G065700-F	AGCGCTGAGGTCACTTTCTG
Gh_A01G065700-R	CAAAAACCAGCAGCCGACTC
Gh_A10G116000-F	TAGTCTCAGCAGCCCAAACG
Gh_A10G116000-R	ATTGCTGGACCACCAGGATG
Gh_A13G238300-F	AGCATTCGGACGCCTGTAAA
Gh_A13G238300-R	AAAAGGGTCGATCGGGACAC
Gh_D13G188300-F	TCAGGGTTTGCCCAGCTATG
Gh_D13G188300-R	CCACTGGTTCAGGAGTGGTC
Gh_D05G290300-F	CTGATGCCCTCCATCGAGTC
Gh_D05G290300-R	TCAGAACTTCGGTGCACTCC
Gh_D05G138200-F	ATCATCATCGCCTGCTACCG
Gh_D05G138200-R	AAAATCCCCAGTCGGTGTCC
Gh_D04G059400-F	TCGCCATCTTCACCAGCAAT
Gh_D04G059400-R	CACAACCATGGGATCTGGCT
Gh_A04G042800-F	GTTCTTCCCTCCCTGTGACG
Gh_A04G042800-R	AACCCGAACCGCCAGAAG
Gh_A10G166600-F	CATATCAAGAGGTTACTCAGGTGC
Gh_A10G166600-R	TCCGACGACGACGACTCTTT
Gh_D10G188300-F	CGATGGGGAAAGTGGAACGA
Gh_D10G188300-R	TGTGATTCAACAACATCTCCCG
Gh_D08G067800-F	ATCTTCGTATGCTCCTCCCG
Gh_D08G067800-R	CATGCTATCTCGCCTCGGTT
Gh_D11G199400-F	TGCCTGCATCATTGCCCTTA
Gh_D11G199400-R	TGAAACCGTGTTGCTGGACT
Gh_A11G351700-F	TCGGATTTGCTCCACTGACC
Gh_A11G351700-R	TCTAGGTGGGATGTCGCAGA
Gh_D07G088800-F	ATGTCAAGTCCCACTGATTGGT
Gh_D07G088800-R	GTCGTGGCCTTGTTCGTCG
Gh_D08G133100-F	GTACGGAATCAACAGGCCCA
Gh_D08G133100-R	CGTTCTCGAACACCACCTCA
