# Supplementary figures and images for: Comprehensive Evaluation and Transcriptome Analysis Reveal the Salt Tolerance Mechanism in Semi-Wild Cotton (Gossypium purpurascens)
Source: MDPI journal article supplement (doi:10.3390/ijms241612853), 2023-08-16

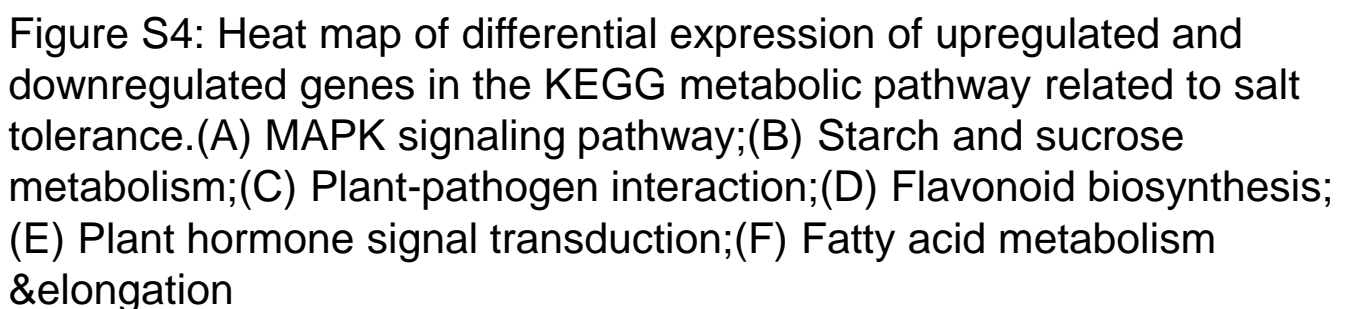

Supplement: s1 [file s1]

05h

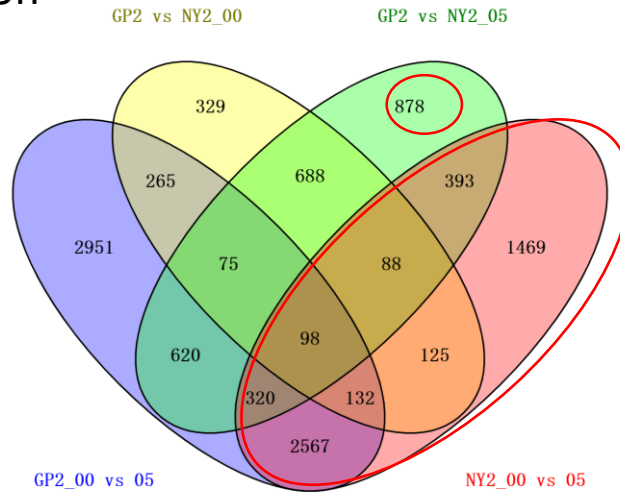

3h

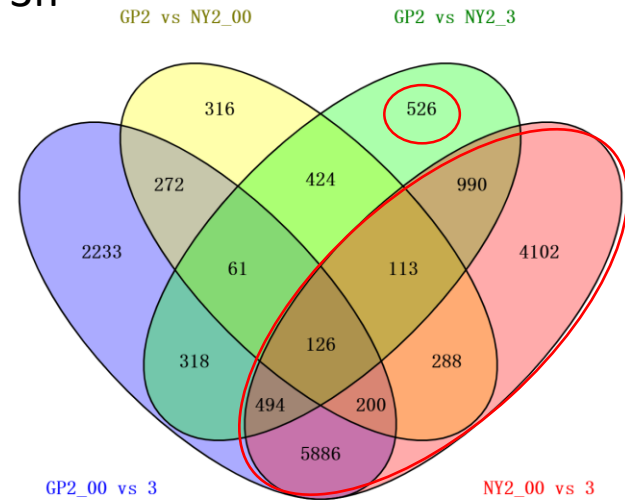

12h

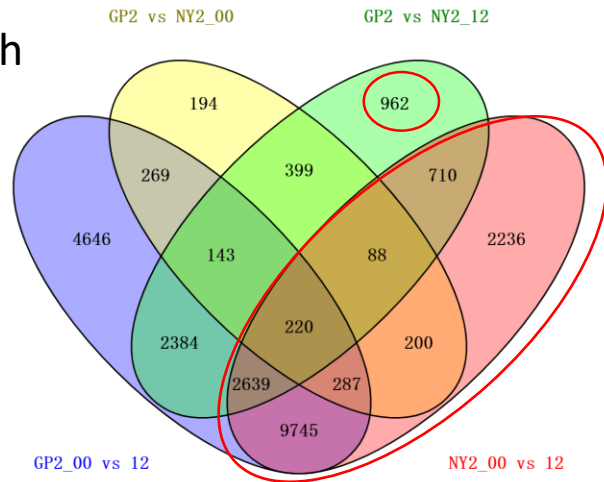

24h

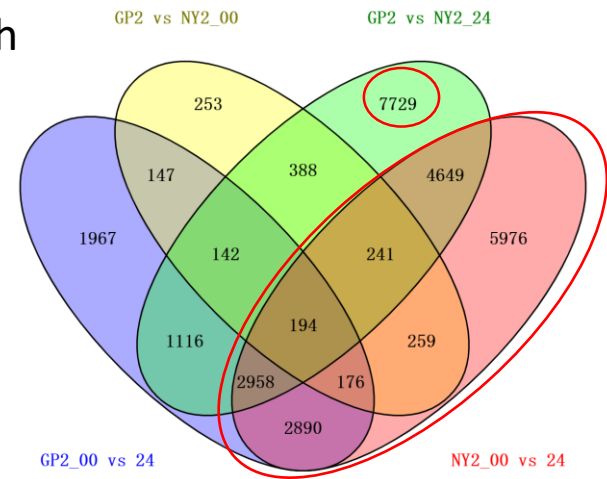

Fig S3: Screening strategy for salt tolerant genes (only selecting NY2 vs GP2 DEG & NY2 CK vs T)

Supplement: s1 [file s1]
